# Supplementary material for: In VitroGlobal Gene Expression Analyses Support the Ethnopharmacological Use ofAchyranthes aspera
Source: Hindawi journal article supplement (doi:10.1155/2013/471739), 2013-01-01
Supplement: f2 [file 471739.f2.pdf]

# METACORE QUICK REFERENCE GUIDE

## USER DATA

|                                                                                                                                                                                                                                                                                                                                                                                                                                                                                                                    |                                                                                                                                                                                                                                                                          |
|--------------------------------------------------------------------------------------------------------------------------------------------------------------------------------------------------------------------------------------------------------------------------------------------------------------------------------------------------------------------------------------------------------------------------------------------------------------------------------------------------------------------|--------------------------------------------------------------------------------------------------------------------------------------------------------------------------------------------------------------------------------------------------------------------------|
| <p><b>NETWORKS</b></p>  <p>Up-regulated (+)<br/>Object has user data with positive value</p>  <p>Down-regulated (-)<br/>Object has user data with negative value</p>  <p>Mixed-signal (+/-)<br/>Object has user data with both positive and negative values</p> | <p><b>MAPS</b></p>    |
|--------------------------------------------------------------------------------------------------------------------------------------------------------------------------------------------------------------------------------------------------------------------------------------------------------------------------------------------------------------------------------------------------------------------------------------------------------------------------------------------------------------------|--------------------------------------------------------------------------------------------------------------------------------------------------------------------------------------------------------------------------------------------------------------------------|

## NETWORK OBJECTS

|                                                                                                                                                                                                                                                                                                                                                                                                                                       |                                                                                                                                                                                                                                                           |
|---------------------------------------------------------------------------------------------------------------------------------------------------------------------------------------------------------------------------------------------------------------------------------------------------------------------------------------------------------------------------------------------------------------------------------------|-----------------------------------------------------------------------------------------------------------------------------------------------------------------------------------------------------------------------------------------------------------|
| <p><b>ENZYMES</b></p> <p>Generic enzyme</p> <p><b>KINASEP</b></p> <p>Generic kinase</p> <p>Protein kinase</p> <p>Lipid kinase</p> <p><b>HOSPHATASE</b></p> <p>Generic phosphatase</p> <p>Protein phosphatase</p> <p>Lipid phosphatase</p> <p><b>PHOSPHOLIPASE</b></p> <p>Generic phospholipase</p> <p><b>PROTEASE</b></p> <p>Generic protease</p> <p>Metalloprotease</p> <p><b>GTPASE</b></p> <p>G-alpha</p> <p>RAS - superfamily</p> | <p><b>GENERIC CLASSES</b></p> <p>Receptor ligand</p> <p>Transcription factor</p> <p>Protein</p> <p>Compound</p> <p>Predicted metabolite or user's structure</p> <p>Inorganic ion</p> <p>Reaction</p> <p>DNA</p> <p>RNA</p> <p>Generic binding protein</p> |
| <p><b>CHANNELS/TRANSPORTERS</b></p> <p>Generic channel</p> <p>Ligand-gated ion channel</p> <p>Voltage-gated ion channel</p> <p>Transporter</p>                                                                                                                                                                                                                                                                                        | <p><b>RECEPTORS</b></p> <p>Generic</p> <p>GPCR</p> <p>Receptors with kinase activity</p>                                                                                                                                                                  |
| <p><b>G PROTEIN ADAPTOR/REGULATORS</b></p> <p>G beta/gamma</p> <p>Regulators (GDI, GAP, GEF, etc.)</p>                                                                                                                                                                                                                                                                                                                                |                                                                                                                                                                                                                                                           |
| <p><b>GROUPS OF OBJECTS</b></p> <p><b>A complex or a group</b><br/>Proteins physically connected into a complex or related as a family</p> <p><b>Logical association</b><br/>Proteins linked by logical relations or physical interactions</p> <p><b>Custom association</b><br/>Group of collapsed objects chosen by user</p>                                                                                                         |                                                                                                                                                                                                                                                           |

## INTERACTIONS BETWEEN OBJECTS

|                                                                                                                                                                                                                                                                                                                                                                                                                                                                                                                                                                                                                                                                                                                                                                                                    |                                                                                                                                                                                                                                                                                                                                                                                                                                                                                                                                                                                                                                                                                                                                                                                                                                                                                                                                                                                                                                                                                                                                                                           |
|----------------------------------------------------------------------------------------------------------------------------------------------------------------------------------------------------------------------------------------------------------------------------------------------------------------------------------------------------------------------------------------------------------------------------------------------------------------------------------------------------------------------------------------------------------------------------------------------------------------------------------------------------------------------------------------------------------------------------------------------------------------------------------------------------|---------------------------------------------------------------------------------------------------------------------------------------------------------------------------------------------------------------------------------------------------------------------------------------------------------------------------------------------------------------------------------------------------------------------------------------------------------------------------------------------------------------------------------------------------------------------------------------------------------------------------------------------------------------------------------------------------------------------------------------------------------------------------------------------------------------------------------------------------------------------------------------------------------------------------------------------------------------------------------------------------------------------------------------------------------------------------------------------------------------------------------------------------------------------------|
| <p><b>EFFECTS</b></p>  <p>Positive / activation</p>  <p>Negative / inhibition</p>  <p>Unspecified</p>                                                                                                                                                                                                                                                                                                                                                                                                                                           | <p><b>MECHANISMS</b></p> <p><b>PHYSICAL INTERACTIONS</b></p> <p><b>B</b> Binding<br/>Compound binds the enzyme or receptor</p> <p><b>C</b> Cleavage<br/>Cleavage of a protein at a specific site yielding distinctive peptide fragments. Proteolytic cleavage can be carried out by both enzymes and compounds</p> <p><b>CM</b> Covalent modifications<br/>Protein activity regulation by covalent binding of a small chemical group to the aminoacids of an active site</p> <p><b>+P</b> Phosphorylation<br/>Protein activity is altered via addition of a phosphate group</p> <p><b>-P</b> Dephosphorylation<br/>Protein activity is altered via removal of a phosphate group</p> <p><b>T</b> Transformation<br/>Protein activity regulation by binding &amp; hydrolysis of GTP</p> <p><b>Tn</b> Transport<br/>Transport of a protein or a compound between organelles</p> <p><b>Z</b> Catalysis<br/>Catalysis of an enzymatic reaction</p> <p><b>Tr</b> Transcription regulation<br/>Physical binding of a transcription factor to target gene's promoter</p> <p><b>M</b> MicroRNA binding<br/>Regulation of gene expression by binding of microRNA to target mRNA</p> |
| <p><b>FUNCTIONAL INTERACTIONS</b></p> <p><b>IE</b> Influence on expression<br/>Compounds change the expression level of target genes indirectly, for instance by binding to upstream receptors</p> <p><b>Cn</b> Competition<br/>Protein activity regulation by competition at the substrate binding site</p> <p><b>?</b> Unspecified interactions<br/>Mechanism is unknown or/and effect is indirect</p> <p><b>PE</b> Drug-Drug interactions. Pharmacological effect<br/>Drugs change pharmacological effects of other drugs, for instance by competing for drug metabolism enzymes or organic transporters</p> <p><b>TE</b> Drug-Drug interactions. Toxic effect<br/>Drugs change toxic effects of other drugs, for instance by competing for drug metabolism enzymes or organic transporters</p> |                                                                                                                                                                                                                                                                                                                                                                                                                                                                                                                                                                                                                                                                                                                                                                                                                                                                                                                                                                                                                                                                                                                                                                           |
| <p><b>LOGICAL RELATIONS</b></p> <p><b>GR</b> Group relation<br/>Object belongs to a generic group of related objects</p> <p><b>CS</b> Complex subunit<br/>Protein is a subunit of a protein complex</p> <p><b>SR</b> Similarity relation<br/>Chemically similar compounds with chosen Tanimoto similarity score</p>                                                                                                                                                                                                                                                                                                                                                                                                                                                                                |                                                                                                                                                                                                                                                                                                                                                                                                                                                                                                                                                                                                                                                                                                                                                                                                                                                                                                                                                                                                                                                                                                                                                                           |

**LINKS ON NETWORKS**

**Incoming interaction**  
When the mouse is over object, yellow link indicates direction to object

**Outgoing interaction**  
Cyan link indicates direction FROM the object

**INTERACTIONS FROM CUSTOM LIST (MetaLink™)**

**Interaction is in the network**  
Interaction is represented by a thin solid line and is highlighted in blue

**Interaction is in the base, but not in network**  
Interaction is highlighted in yellow

**Interaction is in the network**  
Interaction is highlighted in magenta

**CANONICAL PATHWAYS**

**Canonical pathway**  
The link is highlighted in a thick cyan or magenta line

**LINKS ON MAPS**

**Disrupts in disease**

**Weakens in disease**

**Emerges in disease**

**Enhances in disease**

**Species specific interactions**

## OBJECTS ON MAPS

|                                                                                                                                                               |                                                                                                                                                                                     |
|---------------------------------------------------------------------------------------------------------------------------------------------------------------|-------------------------------------------------------------------------------------------------------------------------------------------------------------------------------------|
| <p><b>LOCALIZATION</b></p> <p>Mitochondria</p> <p>EPR</p> <p>Golgi</p> <p>Nucleus</p> <p>Lysosome</p> <p>Peroxisome</p> <p>Cytoplasm</p> <p>Extracellular</p> | <p><b>OTHER MAP OBJECTS</b></p> <p>Note</p> <p>Normal process</p> <p>Pathological process</p> <p>Normal map</p> <p>Disease map</p> <p>Species specific object</p> <p>Path start</p> |
|---------------------------------------------------------------------------------------------------------------------------------------------------------------|-------------------------------------------------------------------------------------------------------------------------------------------------------------------------------------|

## THOMSON REUTERS REGIONAL OFFICES

### North America

Philadelphia +1 800 336 4474  
+1 215 386 0100

### Latin America

+55 11 8370 9845

### Europe, Middle East and Africa

Barcelona +34 93 459 2220  
London +44 20 7433 4000

### Asia Pacific

Singapore +65 6775 5088  
Tokyo +81 3 5218 6500

Contact us to find out more about *MetaCore* or visit [thomsonreuters.com/diseaseinsight](http://thomsonreuters.com/diseaseinsight)

For a complete office list visit: [science.thomsonreuters.com/contact](http://science.thomsonreuters.com/contact)

LS0611235

Copyright © 2012 Thomson Reuters

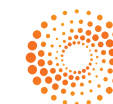

THOMSON REUTERS™
