# Supplementary material for: In Vitro Global Gene Expression Analyses Support the Ethnopharmacological Use of Achyranthes aspera
Source: Evid Based Complement Alternat Med. 2013 Dec 15;2013:471739. doi: 10.1155/2013/471739 (PMC3880711; doi:10.1155/2013/471739)
Supplement: Supplementary file 1 — The gene expression data is deposited with the NCBI's “Gene Expression Omnibus” database repository under the accession number GSE44290. Supplementary data Table S-1 and supplementary Figure SF-1 are available online at http://dx.doi.org/10.1155/2013/471739. The data referred in sections 3.1, 3.2 & 3.3 are included in the supplementary data Table S-1. The legends for the objects in Figure 4 are given in the supplementary Figure SF-1. [file 471739.f1.xls]

## Sheet: spot test
ID	FC24	FDR24	FC48	FDR48	FC72	FDR72
A_24_P23454	-1.00039	0.997458	-1.09849	0.54602	-1.52521	0.016739		**spot test
A_23_P51479	-1.00022	0.996818	-1.04685	0.528469	-1.64447	0.000203493
A_23_P212672	-1.00053	0.996538	1.00889	0.969423	-1.70472	0.0122129
A_32_P203998	-1.0007	0.996538	-1.01979	0.944268	1.54836	0.0658067
A_23_P80027	1.00079	0.996538	1.66256	0.069201	1.40347	0.204249
A_23_P325802	-1.00075	0.996505	1.47292	0.0971893	1.64537	0.0507342
A_23_P104689	-1.00081	0.996421	1.40706	0.0116511	1.63815	0.0390763
A_24_P56363	-1.00147	0.996011	1.05291	0.907123	-1.88207	0.0891488
A_23_P76799	1.00112	0.996011	1.36529	0.0120498	-1.73916	0.0546206
A_24_P685241	-1.00079	0.99515	-1.08208	0.642179	-1.73253	0.00758301
A_23_P127584	-1.00103	0.994968	-1.20911	0.357541	-1.58981	0.0309688
A_23_P25698	-1.0009	0.994912	1.13228	0.433651	1.72221	0.00847319
A_23_P39755	-1.00114	0.994912	1.33225	0.193678	2.07116	0.0103533
A_23_P34345	1.00072	0.994912	-1.38396	0.0264674	1.57072	0.00730473
A_23_P5300	-1.00069	0.994912	1.94875	0.000695942	1.95942	0.000126491
A_24_P917344	1.00111	0.994717	-1.52741	0.0473937	-1.09366	0.656404
A_23_P125815	1.00073	0.994227	-1.02269	0.865527	-1.6067	0.00345982
A_23_P55179	-1.0031	0.99296	-1.21304	0.669795	-2.11961	0.0938779
A_23_P6150	1.00245	0.992764	1.26701	0.419202	2.633	0.0100275
A_32_P89899	1.00097	0.992634	1.10177	0.439522	1.71781	0.00305997
A_24_P808016	1.00148	0.992339	-1.14808	0.455905	1.57518	0.0314034
A_23_P165325	1.00122	0.992176	-1.3524	0.0400894	-1.79629	0.00272049
A_32_P80587	-1.00288	0.991758	-1.11399	0.755069	2.61026	0.0131563
A_24_P145629	1.00133	0.991319	1.01114	0.952943	-1.76767	0.00409207
A_23_P80032	-1.00169	0.991236	1.27514	0.109571	2.20837	0.00948851
A_32_P169774	1.00195	0.990898	-1.70115	0.024292	-1.84199	0.0139254
A_23_P70213	1.00183	0.990069	-2.01011	0.0026055	-1.83909	0.00254082
A_24_P938461	1.00095	0.989829	1.14366	0.105864	1.68749	0.000277503
A_32_P217561	-1.00151	0.989829	2.27925	0.000890456	1.37818	0.0283445
A_23_P302028	1.00699	0.989046	-1.1055	0.89341	-3.21607	0.0790264
A_24_P331150	-1.00126	0.989046	1.17808	0.1246	1.79143	0.000667943
A_23_P27346	1.00106	0.988352	1.79643	0.010767	-2.00396	0.001395
A_23_P96775	-1.00096	0.987605	-1.02095	0.774177	1.56481	0.000382122
A_23_P163787	1.00189	0.987086	-1.34249	0.0532738	1.8453	0.00232508
A_23_P33433	1.00368	0.986825	1.0569	0.866026	-1.62313	0.0942293
A_24_P108242	-1.00131	0.986825	-1.30967	0.0162315	1.57639	0.000969165
A_24_P932016	-1.00233	0.98579	1.50683	0.0276995	1.31689	0.0990578
A_24_P927972	1.00285	0.985777	1.04316	0.849798	-1.89102	0.00977179
A_23_P48936	1.00234	0.984635	1.13151	0.133873	1.51756	0.000674811
A_24_P38572	-1.00297	0.984042	1.5596	0.0375021	-1.223	0.286974
A_23_P16275	1.0058	0.984013	-1.70039	0.155573	-2.14251	0.0628272
A_23_P329573	1.00237	0.983936	1.26449	0.00615807	-1.74475	0.00474784
A_32_P186832	1.00371	0.982672	-1.09384	0.716623	-1.50532	0.0864058
A_24_P773539	-1.00329	0.981926	-1.03795	0.86805	-1.58545	0.0295002
A_23_P130182	-1.00446	0.981234	1.56389	0.0802251	1.50064	0.117056
A_23_P406928	-1.00362	0.981008	-1.10683	0.631538	-1.90048	0.0105058
A_23_P102517	1.00276	0.978387	1.77755	0.0027411	1.38834	0.0154719
A_24_P929441	1.00233	0.97832	1.71761	0.00236079	1.01886	0.867791
A_23_P90280	1.00557	0.977952	1.36325	0.240675	1.6828	0.0710139
A_23_P320862	-1.00253	0.977513	-1.15181	0.251247	1.6591	0.00326365
A_23_P202496	1.00305	0.977513	-1.10091	0.236299	-1.5121	0.000532091
A_32_P123990	-1.0031	0.977474	1.01987	0.907352	1.61488	0.00667624
A_23_P503064	1.0058	0.976998	1.53034	0.0736705	-1.49571	0.0968004
A_23_P412508	1.00449	0.976998	1.56464	0.0466957	1.60637	0.0389746
A_23_P26878	-1.00189	0.976405	1.08474	0.265908	-1.60097	0.000268008
A_24_P854440	1.0051	0.976274	-1.74822	0.0242032	-1.74577	0.0229101
A_23_P26965	-1.00379	0.97603	1.01988	0.927664	2.31168	0.00152879
A_23_P2683	1.00621	0.975889	-1.64327	0.0544867	-1.62434	0.0606652
A_24_P175347	1.00641	0.975186	1.00064	0.998688	-2.2143	0.0132962
A_24_P80152	1.0069	0.974391	1.23559	0.432528	1.62551	0.0906988
A_24_P24453	1.00611	0.974192	-1.55815	0.0492433	-1.87068	0.0150519
A_23_P162822	-1.00471	0.972875	1.00307	0.989467	1.54827	0.027747
A_24_P195544	-1.00385	0.972158	-1.64573	0.00873359	1.35557	0.0492931
A_32_P33034	-1.00545	0.971791	-1.39423	0.103813	-1.90695	0.00895413
A_23_P368773	-1.00369	0.971773	1.1649	0.225557	1.53604	0.00916898
A_23_P124837	1.00239	0.971201	-1.25884	0.0202639	-3.81989	0.001421
A_23_P252062	-1.00683	0.97112	1.14579	0.381164	1.64002	0.00952068
A_23_P132973	1.00396	0.970366	1.31813	0.0490595	1.58651	0.00726407
A_32_P107752	1.00738	0.970137	1.53889	0.0910987	2.29405	0.0096618
A_23_P57577	1.00237	0.970137	1.53605	0.00147154	1.16571	0.0345112
A_23_P84782	-1.00797	0.969208	1.04048	0.893167	-1.55265	0.0900995
A_23_P116765	-1.00289	0.969208	-1.14879	0.107624	-2.01783	0.000172852
A_24_P32692	1.00593	0.968951	1.05542	0.798725	1.92847	0.0072019
A_23_P34460	1.00934	0.96884	-1.22237	0.491196	-2.23653	0.0199457
A_23_P134827	-1.00207	0.968748	1.11765	0.0990579	1.69933	0.000173244
A_23_P422766	1.0039	0.968641	1.58357	0.00760228	-1.16155	0.229287
A_32_P211708	-1.00749	0.96805	1.58976	0.0478893	2.042	0.00922518
A_23_P323872	-1.00509	0.967416	1.10289	0.53544	-1.54792	0.0160649
A_24_P229833	1.00491	0.967169	1.01718	0.930591	1.5825	0.0115271
A_23_P312752	-1.00292	0.967093	-1.2135	0.0269252	-1.84753	0.000139527
A_23_P123732	1.00473	0.966263	1.12424	0.405477	1.68697	0.00617041
A_23_P149398	1.0085	0.965723	1.15437	0.582626	-1.7038	0.0544298
A_32_P166135	1.00724	0.965445	1.51668	0.0579286	1.66106	0.0327609
A_23_P137410	-1.00306	0.965249	-1.19232	0.0362236	-1.98538	0.00010338
A_23_P97473	1.00439	0.965	1.69245	0.004386	1.93775	0.00111457
A_23_P209389	1.00908	0.964897	1.43268	0.00336565	1.63434	0.00036761
A_24_P81841	1.0067	0.964838	1.72324	0.015545	2.27296	0.000227748
A_23_P128940	-1.00516	0.964778	-1.03198	0.849918	1.60802	0.00761015
A_23_P215790	1.00777	0.963809	-1.76444	0.0271942	-3.82554	0.000233729
A_32_P175042	1.0147	0.963425	1.28595	0.53071	2.19013	0.0665277
A_24_P367247	1.00526	0.96322	1.27815	0.0939355	-2.39335	0.000598079
A_23_P23593	-1.00729	0.962911	-1.29103	0.156954	-1.52425	0.0375563
A_23_P115022	-1.00954	0.962911	-1.5064	0.150371	2.20851	0.0140279
A_23_P352684	1.00928	0.962238	-1.15515	0.562823	-1.77609	0.0369095
A_24_P127063	1.00901	0.962238	-1.59166	0.0520213	-1.23166	0.339859
A_24_P401241	1.00529	0.962238	1.56463	0.0113711	1.54354	0.0118571
A_23_P415411	1.00301	0.961825	1.34412	0.00457792	1.91985	9.95537e-05
A_24_P144881	1.00535	0.961779	-2.06847	0.00150834	-2.16457	0.000402271
A_23_P110957	-1.00922	0.960268	1.52355	0.0832202	1.1828	0.462334
A_24_P342020	1.00598	0.960231	1.37417	0.0442543	2.00681	0.00177965
A_32_P160115	-1.00618	0.959431	1.62835	0.0125546	1.00808	0.960382
A_23_P5863	1.00852	0.959156	1.2936	0.236326	1.54071	0.0660346
A_24_P926478	1.01124	0.958586	1.51578	0.130819	1.79673	0.0534137
A_23_P118815	1.00563	0.958521	1.16287	0.279235	-2.90361	0.0224239
A_23_P372925	-1.00647	0.958521	1.42686	0.0261489	1.59975	0.00893375
A_23_P143334	-1.01516	0.958198	-2.10289	0.045184	-2.56274	0.0200216
A_23_P17269	-1.00708	0.957911	-1.46452	0.023169	-1.86203	0.00307643
A_23_P363	-1.00509	0.957136	1.03736	0.791827	2.02293	0.000850097
A_23_P422667	1.00601	0.956758	1.48771	0.0176263	1.5977	0.00705188
A_24_P879729	1.00792	0.956715	1.99524	0.0066731	1.06151	0.749073
A_23_P100263	1.01779	0.956296	-2.05117	0.0683199	-2.53214	0.0320674
A_24_P357950	-1.00465	0.955897	-1.03258	0.817216	1.56726	0.00392691
A_32_P101195	-1.00784	0.95541	-1.15795	0.367222	1.5628	0.0216543
A_23_P201538	1.00331	0.955391	-1.46177	0.0257736	-2.36128	0.000813122
A_32_P213624	1.00538	0.955318	1.58031	0.00760228	1.35543	0.0336015
A_23_P253177	-1.01505	0.954478	1.08046	0.84734	1.8743	0.0812203
A_23_P115743	1.00712	0.954478	1.16789	0.319378	-1.52439	0.0189482
A_23_P387630	1.00758	0.954348	1.69663	0.0132452	1.35621	0.076983
A_24_P342086	-1.01091	0.954303	1.01262	0.96798	-1.62209	0.06066
A_23_P214544	1.00576	0.954303	-1.20445	0.121032	1.66394	0.00324697
A_23_P321452	1.00555	0.954172	1.00683	0.966372	1.68044	0.00309735
A_24_P413920	1.01301	0.953989	1.29966	0.359794	-1.7463	0.0669846
A_24_P937366	1.00507	0.953989	1.23791	0.0573451	1.99486	0.000514303
A_23_P421032	-1.00687	0.95361	1.21764	0.195032	2.5116	0.00071668
A_23_P399116	-1.00764	0.95361	1.42857	0.0408239	1.53016	0.0142086
A_23_P380076	-1.00564	0.953246	-1.0737	0.547383	1.54971	0.00535018
A_23_P315273	-1.00621	0.953181	-1.13561	0.302123	-1.78441	0.00227544
A_23_P55091	1.01364	0.952868	1.0861	0.796814	1.66629	0.0872444
A_23_P131611	-1.01006	0.952778	1.38227	0.118846	2.0641	0.00761312
A_23_P213661	-1.00989	0.952522	-1.69398	0.186999	-1.2477	0.0604466
A_23_P134204	-1.00989	0.952522	1.72807	0.0266614	1.24713	0.303221
A_32_P38623	-1.01007	0.952321	1.16811	0.480227	1.55613	0.0616968
A_23_P65717	1.01355	0.952321	-1.2874	0.368641	1.83645	0.0471222
A_32_P210622	1.0175	0.951996	-1.67304	0.152457	-3.05563	0.0127686
A_24_P181677	-1.00771	0.951489	-1.01424	0.937005	1.56065	0.0125115
A_23_P28886	1.01303	0.951368	1.46887	0.0059972	-1.71414	0.00655845
A_24_P631625	-1.01554	0.9513	1.24314	0.509798	2.83144	0.0114397
A_23_P33816	-1.00773	0.951181	1.28214	0.115444	1.57937	0.012387
A_24_P377775	1.00495	0.95063	1.32673	0.0154447	-1.58876	0.00158804
A_23_P135878	-1.0133	0.950448	1.35421	0.260348	1.72888	0.0623029
A_32_P202719	-1.01086	0.95027	1.00138	0.99658	2.03662	0.0111887
A_24_P151498	-1.00931	0.949969	1.67442	0.0170462	1.59037	0.0264706
A_24_P349151	1.00652	0.949887	-1.13667	0.327505	-1.55268	0.00934832
A_23_P122152	1.00413	0.949848	-1.24266	0.0101868	-2.2459	5.71737e-05
A_32_P214513	1.0088	0.949379	1.50886	0.0368682	1.1567	0.403405
A_23_P400078	1.01868	0.949379	1.19346	0.0229412	-2.07642	7.64922e-05
A_24_P911191	-1.0112	0.949304	-1.03874	0.887905	1.64786	0.045838
A_24_P341938	-1.00447	0.94878	2.04818	0.000695942	-1.04382	0.577506
A_23_P209389	-1.00735	0.948754	1.43268	0.00336565	1.63434	0.00036761
A_24_P931755	-1.0114	0.948367	1.06476	0.813447	-1.69047	0.039401
A_24_P840688	1.01023	0.947867	-1.28654	0.197561	-1.73456	0.0171699
A_23_P64102	-1.00542	0.947363	1.77993	0.00139886	1.34814	0.0122218
A_24_P419017	1.00656	0.946939	1.09208	0.489365	-1.60004	0.00453531
A_24_P697345	1.00983	0.946502	-1.17404	0.362125	-2.06256	0.0039514
A_32_P201792	1.00941	0.946357	1.64814	0.0186357	1.96271	0.00554181
A_23_P144872	-1.00925	0.945296	-1.04102	0.849918	-1.53977	0.0311399
A_24_P162226	-1.01023	0.945225	1.01211	0.958166	1.50619	0.0364931
A_24_P757370	1.01206	0.945225	1.55456	0.0676649	1.88836	0.0207189
A_23_P205686	-1.00799	0.945225	-1.37763	0.0322928	-2.71162	0.000224068
A_24_P414045	-1.00644	0.943658	-1.05157	0.686963	1.92612	0.00076877
A_23_P256676	1.01361	0.943605	1.54774	0.0881333	1.09536	0.726851
A_24_P886040	1.00416	0.943384	1.18706	0.0228174	-2.50318	3.45739e-05
A_24_P314159	-1.00941	0.943027	1.08522	0.509379	1.75318	0.00191096
A_23_P60306	1.02024	0.943027	2.12134	0.00303372	1.4184	0.00482696
A_23_P202156	1.00671	0.943018	-1.13723	0.103116	-1.69931	0.000347768
A_23_P40821	-1.01337	0.942998	1.18847	0.200893	-1.91602	0.0165663
A_24_P387321	1.00681	0.942819	1.26751	0.0671736	1.5048	0.00868592
A_23_P134419	1.00566	0.942531	1.68284	0.00240165	1.39401	0.00977179
A_24_P265376	1.01184	0.941554	1.3086	0.199155	1.81099	0.018642
A_32_P31355	-1.01242	0.941351	-1.32123	0.201556	-1.79485	0.0243203
A_24_P81514	-1.0067	0.941351	1.15926	0.0928925	1.9863	0.000230195
A_23_P97328	1.00921	0.940849	-1.10184	0.550685	1.65563	0.00838022
A_23_P32177	-1.00736	0.939806	-1.10787	0.360568	2.75772	0.000118068
A_23_P214080	-1.01228	0.939775	-1.63078	0.0233113	-2.06425	0.00468011
A_23_P930	-1.00796	0.939517	-1.57713	0.0113353	1.25654	0.0999907
A_32_P4985	-1.00938	0.939516	-1.11706	0.49415	1.5274	0.0168007
A_24_P172293	1.00895	0.938722	1.04251	0.804808	-1.99828	0.00175367
A_23_P320846	-1.00733	0.938412	-1.36356	0.0298786	1.54681	0.00693353
A_24_P802562	-1.01048	0.937934	-1.12739	0.435991	-2.03883	0.00226595
A_32_P114866	-1.00694	0.937866	1.19048	0.103343	-1.70237	0.00126656
A_23_P168651	1.00946	0.937766	-1.17577	0.30719	1.62423	0.0131597
A_23_P168531	1.0092	0.937766	-1.6924	0.00832949	-1.11945	0.429593
A_23_P371777	-1.01648	0.937736	2.11135	0.0384749	2.27596	0.0252497
A_24_P9883	1.01117	0.937736	-1.64229	0.0175411	-1.28666	0.159933
A_24_P247823	1.01837	0.936913	1.198	0.552717	1.96189	0.0428004
A_23_P57306	1.00914	0.936913	1.5388	0.0166826	1.30397	0.0817116
A_24_P279718	1.00741	0.93662	-1.08483	0.496478	1.62424	0.00353638
A_23_P169331	-1.00928	0.93662	1.28317	0.111307	1.63746	0.010868
A_23_P164718	-1.00524	0.936518	1.01701	0.852414	1.5444	0.00080709
A_23_P256855	1.00912	0.936518	1.7095	0.00756554	1.27259	0.121766
A_23_P502750	-1.0117	0.936501	-1.37709	0.101889	-1.90504	0.002343
A_23_P97736	-1.00806	0.936186	-1.0658	0.61944	1.75696	0.00228664
A_23_P4696	1.01402	0.936186	1.21011	0.39409	2.12239	0.00944261
A_23_P128384	-1.01243	0.93606	1.18873	0.349731	-1.51059	0.0412918
A_23_P104335	-1.00943	0.935925	-1.01109	0.946362	-2.78818	0.000224417
A_32_P61729	1.01479	0.93561	1.20748	0.408934	1.65748	0.0432948
A_23_P201538	-1.01466	0.935519	-1.46177	0.0257736	-2.36128	0.000813122
A_23_P362736	1.01219	0.935248	1.18047	0.390413	1.62953	0.0286179
A_23_P77847	1.00884	0.935158	-1.13065	0.337511	1.65025	0.0313582
A_23_P30223	1.0134	0.934923	1.03787	0.885194	-1.67085	0.0354255
A_32_P65371	-1.01441	0.933632	-1.08056	0.747265	-1.50765	0.075221
A_24_P116710	-1.01471	0.933631	1.04074	0.882631	1.73444	0.0326672
A_24_P103686	-1.0136	0.933473	1.35046	0.159275	1.71661	0.0204155
A_23_P5300	-1.0059	0.93341	1.94875	0.000695942	1.95942	0.000126491
A_23_P121851	-1.00748	0.932665	1.02487	0.829504	-1.63224	0.00135855
A_23_P124559	-1.01945	0.931999	-1.14639	0.654033	2.06244	0.0287775
A_23_P87879	-1.00759	0.931515	-1.23147	0.0543521	2.22982	0.00161483
A_23_P250813	1.00782	0.931282	1.25437	0.133392	-1.55175	0.0307553
A_23_P89249	1.01069	0.931282	-1.22468	0.0638672	1.76106	0.00613381
A_32_P118372	1.01554	0.931113	1.02611	0.928199	1.52583	0.0829454
A_23_P39799	-1.01278	0.931051	1.04069	0.849918	-1.64249	0.0181719
A_32_P404549	-1.01771	0.931039	-1.15074	0.599315	1.64219	0.0662446
A_24_P917766	1.00956	0.930394	1.09939	0.513675	1.50554	0.0168809
A_23_P29803	-1.01611	0.930249	1.4705	0.113997	1.53622	0.0822107
A_23_P209389	-1.00686	0.929635	1.43268	0.00336565	1.63434	0.00036761
A_24_P588578	-1.01517	0.928613	-1.05458	0.823185	-1.85866	0.0134881
A_23_P418434	1.01261	0.928157	-1.02417	0.921328	1.54767	0.0305082
A_23_P250800	1.0205	0.927787	1.40061	0.047986	1.59365	0.0144994
A_24_P192183	1.00823	0.927365	1.07695	0.544701	-1.51805	0.00773724
A_24_P116700	1.01406	0.927137	1.29065	0.207998	1.63511	0.0308305
A_24_P179903	1.02344	0.926697	-1.17289	0.655903	-1.8999	0.0732304
A_23_P13772	-1.0101	0.926697	1.10513	0.486018	-1.77311	0.00360659
A_24_P237265	1.00825	0.92656	1.02568	0.844191	1.58883	0.00343387
A_23_P376088	1.01	0.92656	-1.50804	0.00851821	-1.07367	0.553602
A_23_P250813	1.01766	0.926152	1.25437	0.133392	-1.55175	0.0307553
A_23_P89249	1.01755	0.926152	-1.22468	0.0638672	1.76106	0.00613381
A_24_P181101	1.01097	0.926	1.22044	0.17751	2.18921	0.00127659
A_23_P152963	-1.01079	0.925871	-1.03112	0.837199	-1.53258	0.00979357
A_23_P7313	1.01112	0.924322	-1.24027	0.0442807	-2.93718	5.79583e-05
A_24_P152833	1.02204	0.924128	-1.3716	0.244838	-1.69886	0.0747459
A_24_P139761	-1.00956	0.923493	2.47816	0.000709687	-1.18377	0.152336
A_23_P125451	1.00715	0.923445	1.17914	0.0741699	-1.9053	0.0424415
A_23_P210451	-1.01912	0.92234	1.32817	0.265405	1.69962	0.0611727
A_23_P202540	1.01485	0.92234	1.16026	0.0639627	1.66351	0.00293703
A_23_P167723	-1.01445	0.922321	-1.2217	0.286888	-2.23649	0.00342095
A_23_P169470	1.00981	0.922002	1.29038	0.0607833	1.84236	0.031047
A_23_P122782	-1.01216	0.922001	1.53327	0.0189525	2.12706	0.00146779
A_23_P91970	1.00974	0.921996	1.02304	0.88307	-1.52362	0.00801931
A_32_P351936	1.04001	0.921996	1.5462	0.397113	2.8262	0.0636612
A_23_P22013	1.00792	0.921996	1.565	0.00230022	1.8337	0.000404366
A_23_P153320	-1.01327	0.921592	2.16489	0.000404172	3.52436	2.9878e-05
A_32_P125496	1.01339	0.921169	1.6785	0.0178653	-1.02608	0.887831
A_23_P143774	1.01475	0.92074	-1.02214	0.929315	1.51343	0.0547026
A_24_P123658	1.01972	0.920124	-1.34997	0.197344	-2.05017	0.0122299
A_23_P10385	-1.02752	0.919566	1.36051	0.0447369	1.63049	0.000351229
A_24_P944751	1.00704	0.919566	1.28701	0.0150819	1.62976	0.000532091
A_23_P6303	1.01212	0.919471	1.007	0.974217	1.52257	0.0172035
A_23_P78717	-1.01299	0.919138	-1.10797	0.539164	-1.57449	0.0179409
A_23_P425502	-1.02095	0.918821	-1.17972	0.542606	-1.71934	0.0575025
A_23_P423389	1.01068	0.918531	1.17194	0.190643	-1.69244	0.00231799
A_23_P133345	1.03371	0.917495	-2.15869	0.0616912	-2.46837	0.0405365
A_23_P429670	-1.01096	0.917234	1.17197	0.243728	1.74076	0.00425761
A_23_P7313	1.01727	0.917234	-1.24027	0.0442807	-2.93718	5.79583e-05
A_24_P516246	-1.01155	0.915957	-1.30566	0.0643978	-1.68297	0.00489281
A_32_P121483	1.02394	0.915309	-1.11419	0.730404	1.7804	0.0652321
A_23_P207400	-1.01833	0.915045	-1.9609	0.0584614	-2.57221	0.0192656
A_23_P112220	-1.02796	0.914992	1.00597	0.989589	2.06857	0.0479959
A_23_P405282	1.02264	0.91467	-1.22868	0.439522	-1.92587	0.0319866
A_23_P135769	1.0076	0.91467	-2.50401	0.0242963	1.673	0.000472045
A_23_P89431	-1.04531	0.91467	-1.32723	0.00406145	-1.8262	0.000139901
A_24_P286054	1.01684	0.914322	1.5643	0.0493477	1.22675	0.322744
A_23_P131596	-1.01234	0.91386	-1.25551	0.129025	-2.34514	0.000840798
A_23_P12849	1.0118	0.913779	1.02313	0.895778	-1.56682	0.0115825
A_24_P15292	-1.01943	0.912811	1.07673	0.775235	1.90007	0.019117
A_23_P362893	1.02636	0.912337	1.00066	0.998824	-2.15516	0.0311768
A_23_P206359	1.01678	0.912202	-1.58677	0.0224256	-1.98133	0.0044654
A_23_P134854	-1.01213	0.912196	-1.01875	0.91572	1.80171	0.00317499
A_24_P85391	1.01543	0.912196	-1.27023	0.202528	1.62219	0.0210395
A_32_P70759	1.01007	0.912078	1.08289	0.491506	1.99068	0.000645521
A_23_P214821	-1.0155	0.912078	1.3297	0.00850756	2.59844	0.000679085
A_32_P62480	-1.02472	0.910844	-1.08224	0.817225	-1.72996	0.0787948
A_32_P52632	-1.01904	0.910837	1.06961	0.746799	1.57041	0.0332801
A_24_P219418	-1.00906	0.910581	1.56381	0.00344475	1.49166	0.00443057
A_23_P108743	1.01021	0.910284	1.98327	0.00144234	1.09107	0.445147
A_23_P113716	1.02339	0.909446	1.86476	0.00132464	-3.04098	0.000137387
A_24_P359545	-1.01684	0.90937	1.6099	0.0275912	1.09839	0.611337
A_23_P71530	1.02008	0.908255	-1.32969	0.153472	-1.58587	0.000993745
A_32_P193262	1.01603	0.908255	1.57166	0.031968	1.97077	0.00623595
A_32_P129310	1.02459	0.907646	-1.13885	0.65999	-1.7954	0.0558766
A_23_P373079	-1.0205	0.907586	-1.1843	0.463128	-1.54474	0.0747114
A_23_P107653	1.00989	0.90713	-1.67805	0.0820359	1.77039	0.000994246
A_23_P359245	1.02104	0.906749	1.52359	0.0771814	1.66594	0.0452233
A_23_P206441	1.00776	0.906656	-1.16102	0.0457514	-1.61166	0.000326259
A_24_P367864	1.03052	0.906584	-1.22242	0.573265	2.28447	0.0324624
A_32_P375286	-1.01894	0.906584	1.4249	0.0967635	-1.61453	0.0379348
A_24_P726215	-1.02403	0.906218	1.19482	0.505126	-2.37469	0.0102175
A_23_P70213	1.02238	0.906025	-2.01011	0.0026055	-1.83909	0.00254082
A_23_P125253	1.01334	0.905942	-1.20615	0.209437	-1.78175	0.00504431
A_23_P369237	-1.01592	0.905476	-1.26975	0.299254	-1.5335	0.0790489
A_23_P98183	-1.00689	0.905476	-1.09999	0.237937	2.16011	0.00166497
A_23_P167250	-1.02212	0.904599	-1.01819	0.951462	1.53727	0.0806579
A_32_P63630	-1.01085	0.904599	-1.05215	0.695494	1.62087	0.00266666
A_32_P116219	1.025	0.903504	-1.139	0.624454	-2.14265	0.0131342
A_23_P1331	1.01607	0.90345	1.09235	0.382192	1.9228	0.00453768
A_23_P24987	1.03548	0.903308	1.04234	0.933372	2	0.0889069
A_23_P306845	-1.01866	0.903047	1.04014	0.86805	-1.58836	0.0418214
A_24_P196568	1.02085	0.903047	-1.0771	0.755691	-1.59218	0.0465381
A_23_P154849	-1.01931	0.902514	1.59565	0.0378641	1.72195	0.0234074
A_23_P307274	1.01618	0.902435	-1.28683	0.131208	-1.79701	0.00761312
A_32_P108367	-1.01928	0.902172	1.65142	0.029223	1.00072	0.997296
A_24_P945036	1.02338	0.902106	1.67527	0.0556167	1.40415	0.173864
A_32_P197976	-1.03453	0.901545	-1.07179	0.872506	2.32383	0.0408433
A_23_P9255	-1.01397	0.901066	1.42754	0.0654341	1.702	0.0173419
A_32_P189680	1.02608	0.899531	1.19606	0.507158	1.92801	0.0293091
A_24_P345837	-1.0113	0.899427	-1.39425	0.0174699	-1.57608	0.00425111
A_23_P21072	-1.01168	0.89885	1.01167	0.936212	2.00494	0.000652409
A_24_P367965	1.01899	0.89885	-1.11431	0.604115	-1.8238	0.0133365
A_23_P10385	1.02835	0.89885	1.36051	0.0447369	1.63049	0.000351229
A_23_P201538	1.02759	0.89885	-1.46177	0.0257736	-2.36128	0.000813122
A_23_P74081	1.01654	0.89885	1.57703	0.0069368	-1.64889	0.000412445
A_24_P911255	-1.01749	0.898748	-1.00107	0.99697	1.74627	0.0113563
A_23_P162374	1.00921	0.898267	-1.1533	0.0346878	-1.76986	0.000118924
A_32_P22826	1.01516	0.898086	-1.12716	0.433139	1.62106	0.0109695
A_32_P66091	1.0157	0.89802	1.22619	0.156446	1.62375	0.00909877
A_24_P308128	-1.01526	0.897646	-1.01468	0.943024	-1.54904	0.0148848
A_23_P92499	-1.0179	0.897646	1.39349	0.040364	1.77195	0.00479558
A_23_P147296	1.0251	0.897601	1.36156	0.192997	-2.1595	0.0106559
A_23_P52639	-1.00871	0.897421	1.18981	0.0811268	1.51967	0.00155176
A_24_P66249	-1.02205	0.89685	-1.22915	0.325943	-1.60936	0.0407405
A_23_P211488	-1.0191	0.896679	-1.00159	0.99518	-1.59603	0.0284689
A_23_P201376	-1.02207	0.896346	1.41681	0.0995074	1.59274	0.0454578
A_23_P416238	1.01625	0.896178	-1.03874	0.839693	-1.5804	0.0135286
A_24_P4736	1.03083	0.896178	-1.27315	0.448286	-3.23162	0.00532997
A_32_P347617	-1.01278	0.896178	1.52343	0.00837366	1.31382	0.0343829
A_23_P72096	-1.02686	0.895759	1.40709	0.0435314	1.98027	0.0167109
A_23_P28886	-1.01858	0.895418	1.46887	0.0059972	-1.71414	0.00655845
A_23_P315320	-1.02053	0.894524	1.14542	0.508938	1.74034	0.0214721
A_24_P595237	-1.01628	0.894517	1.15745	0.360386	1.55219	0.020273
A_23_P148798	-1.01541	0.894314	-1.39776	0.00390386	-2.08125	7.79259e-05
A_23_P45970	-1.01772	0.89427	1.00652	0.977687	1.64072	0.0160328
A_23_P147578	-1.02289	0.894208	-1.27008	0.237928	-1.86306	0.0128456
A_23_P126735	-1.0085	0.893432	1.63477	0.00223122	1.63241	0.0010312
A_23_P217297	-1.02385	0.893313	1.09683	0.706716	-1.89196	0.0190014
A_23_P97532	1.02181	0.893313	1.50179	0.0612693	-1.03582	0.87371
A_24_P887857	1.01852	0.893313	-1.41764	0.0488342	-1.56624	0.0214144
A_23_P56865	-1.00822	0.893176	1.31884	0.0068933	1.50657	0.000886357
A_23_P146187	1.01606	0.893095	1.28951	0.103343	1.52269	0.0213649
A_23_P204472	-1.00969	0.892883	-1.69736	0.00321975	-1.57583	0.00216338
A_23_P216038	1.02036	0.892703	1.15394	0.437042	1.52895	0.040245
A_23_P112820	1.02452	0.892686	1.20479	0.4068	1.6594	0.045301
A_23_P39898	-1.0193	0.892671	1.73695	0.0143868	1.47504	0.0543603
A_24_P268729	1.02191	0.891748	-1.00484	0.985866	-1.95809	0.010375
A_24_P333216	-1.01028	0.891748	1.11634	0.271547	1.63812	0.00113521
A_24_P187119	1.02241	0.891748	1.56601	0.0575273	1.75476	0.0264733
A_24_P697493	-1.00922	0.891378	1.01643	0.83794	-1.96486	0.00010338
A_23_P389692	-1.02805	0.891323	-1.08329	0.782257	2.47469	0.00713919
A_23_P76291	-1.02533	0.891134	-1.00868	0.977922	-1.67863	0.047165
A_23_P68452	1.01264	0.891134	1.27631	0.0477606	1.69342	0.00211639
A_23_P146146	1.01738	0.891134	-1.6292	0.0186958	1.136	0.401603
A_23_P1331	1.01171	0.890723	1.09235	0.382192	1.9228	0.00453768
A_23_P106145	-1.0213	0.890723	1.25643	0.19756	1.70712	0.0150902
A_23_P36611	1.015	0.890723	1.91659	0.00277576	2.00795	0.00126621
A_24_P187874	-1.01625	0.890599	1.29763	0.0949679	2.35152	0.000913839
A_23_P41114	1.0096	0.890396	1.23428	0.033686	1.68069	0.00059176
A_24_P915117	1.02493	0.890354	1.63733	0.0525493	1.70346	0.040537
A_24_P247106	-1.01839	0.890253	1.83039	0.00656769	1.7441	0.00826199
A_32_P39866	-1.01581	0.889553	-1.40868	0.0384155	-1.8121	0.00402365
A_23_P69791	1.02147	0.887776	-1.29303	0.122737	-1.75132	0.0089016
A_24_P227927	-1.0303	0.887514	1.01226	0.971684	1.64295	0.0701532
A_24_P314597	1.04984	0.887401	2.19896	0.0794512	1.75655	0.1939
A_24_P940666	-1.01203	0.887041	1.12946	0.24003	-2.15907	0.000277174
A_32_P15466	1.01248	0.886977	1.08598	0.448906	1.94122	0.000606382
A_23_P205713	-1.02202	0.886964	1.13714	0.540653	1.58974	0.0401697
A_24_P599396	1.01178	0.886762	1.11758	0.273545	-1.62228	0.00135533
A_23_P57036	1.01742	0.88662	-1.24762	0.0154363	-1.57981	0.00067013
A_23_P111766	1.01931	0.885982	1.22091	0.204662	2.04053	0.00261442
A_23_P98930	-1.01739	0.88596	1.34401	0.0672689	1.79938	0.00467962
A_32_P23810	-1.02726	0.885417	-1.87832	0.0209301	-1.39202	0.160075
A_23_P34510	-1.02077	0.885322	1.15718	0.414763	1.74785	0.0127093
A_24_P384069	1.02181	0.883636	-1.21207	0.312987	1.53752	0.0353353
A_24_P153701	-1.03358	0.882579	-1.17311	0.591095	-1.70849	0.0726221
A_24_P482189	1.01778	0.881611	-1.36056	0.0654139	-1.64345	0.0102537
A_24_P273635	-1.01171	0.881263	1.62447	0.00236079	1.16066	0.140019
A_23_P97161	1.01498	0.881263	-1.98527	0.000785885	-2.28828	0.000143576
A_24_P921986	1.02789	0.880594	-1.04282	0.889295	1.65271	0.0611256
A_24_P101391	-1.02538	0.880258	-1.09717	0.70041	-1.67181	0.0372327
A_23_P159956	1.02303	0.880227	1.53961	0.0476764	1.02478	0.905202
A_32_P101039	-1.01027	0.879741	1.07257	0.359925	1.52776	0.000895139
A_23_P354175	1.02212	0.879274	1.00405	0.98598	1.99882	0.00443057
A_24_P368735	-1.02155	0.878808	1.04382	0.819509	-1.85582	0.00460727
A_23_P256107	1.02137	0.878557	-1.22675	0.263706	1.52026	0.0360018
A_23_P331748	-1.04788	0.878395	-1.33646	0.458425	-2.38542	0.036345
A_32_P147500	1.02363	0.878395	1.23809	0.291585	1.67396	0.0265466
A_23_P202496	1.02276	0.878151	-1.10091	0.236299	-1.5121	0.000532091
A_24_P132039	-1.02251	0.878151	-1.3023	0.174642	-1.9239	0.0076253
A_23_P79518	-1.02957	0.877952	-1.15797	0.1135	-1.65703	0.0139983
A_23_P329573	1.0722	0.877952	1.26449	0.00615807	-1.74475	0.00474784
A_23_P138507	1.02047	0.87703	1.22214	0.235302	1.77703	0.0266087
A_32_P23308	-1.01128	0.87703	-1.17754	0.0854812	1.54298	0.00146319
A_23_P49627	1.02161	0.87686	-1.04277	0.827678	1.70304	0.00856123
A_32_P178503	1.01657	0.87686	-1.25639	0.101116	-2.67891	0.000237446
A_23_P30024	1.01049	0.876452	-1.63492	0.00717345	-1.50794	0.00105159
A_23_P209735	1.02911	0.875757	1.82834	0.0263211	2.24709	0.0084282
A_32_P141257	-1.03707	0.875706	-1.09348	0.801777	-1.71791	0.0979615
A_23_P31810	1.01519	0.875463	1.59554	0.00615963	1.39208	0.0196754
A_32_P5168	1.01396	0.874414	-1.02192	0.878438	-1.60004	0.00383162
A_23_P9255	-1.02864	0.873566	1.42754	0.0654341	1.702	0.0173419
A_24_P1255	-1.0156	0.873379	1.07217	0.605592	-1.87328	0.00141854
A_24_P250815	1.02198	0.873379	1.37101	0.0800654	2.12784	0.00270567
A_23_P371777	1.01832	0.873379	2.11135	0.0384749	2.27596	0.0252497
A_23_P84762	1.02773	0.873237	-1.00822	0.979068	-1.7338	0.0357798
A_24_P665105	-1.01624	0.873237	-1.10665	0.278769	-2.10665	0.000240763
A_23_P110253	-1.02602	0.872122	1.57067	0.00271039	1.65653	0.00091869
A_24_P418357	1.01781	0.871986	1.72093	0.00447277	2.08604	0.000957924
A_23_P388301	-1.01272	0.871572	-1.18674	0.0850343	-1.59132	0.00162003
A_23_P102523	-1.03604	0.871358	1.82927	0.0480149	1.18268	0.558053
A_32_P143700	-1.01868	0.871358	1.70268	0.00643037	1.88086	0.00205805
A_24_P895528	1.0258	0.870911	1.37573	0.121115	1.83034	0.0151937
A_23_P163787	-1.02465	0.870782	-1.34249	0.0532738	1.8453	0.00232508
A_24_P133933	1.03262	0.870401	1.03275	0.921328	1.92164	0.0309688
A_23_P435002	-1.02336	0.870379	1.04033	0.857811	1.70294	0.018642
A_32_P141211	-1.02373	0.87034	-1.18507	0.347473	-1.55988	0.0339001
A_24_P695691	-1.0418	0.87034	-2.13562	0.0296156	-2.642	0.011348
A_23_P379147	-1.01622	0.869642	1.36725	0.0361559	1.98268	0.000994035
A_24_P144084	-1.02152	0.869029	-1.57414	0.0211602	1.54472	0.0224685
A_23_P127727	1.02751	0.86889	-1.05677	0.800466	-2.23466	0.00341552
A_32_P228521	-1.0127	0.86889	-1.13042	0.214329	-1.72334	0.00091733
A_24_P248240	-1.02286	0.867914	1.13661	0.4393	-1.80336	0.00725299
A_23_P162486	-1.01442	0.867914	1.36947	0.223687	-2.06332	0.0134749
A_24_P61029	-1.02397	0.867371	-1.31246	0.10716	-1.81797	0.00695782
A_23_P78092	-1.03321	0.866824	-1.00924	0.978982	-1.69009	0.0640856
A_23_P64070	-1.03359	0.866824	1.12269	0.687456	1.66072	0.0640684
A_32_P153589	1.03036	0.865941	1.1844	0.489385	-1.82605	0.0295954
A_23_P164650	1.01232	0.865898	-1.28961	0.0425487	1.74626	0.000326259
A_23_P145357	1.01641	0.865898	1.44989	0.0140014	2.38996	0.000308448
A_32_P120863	1.03384	0.865775	-1.64022	0.049362	-1.47681	0.102317
A_32_P898690	1.0303	0.865775	-1.66341	0.0317038	-3.01702	0.00130333
A_32_P859499	-1.03571	0.865612	-1.46174	0.157712	-1.66951	0.0765993
A_24_P522267	1.02448	0.865576	1.59397	0.0175706	1.01256	0.941943
A_23_P203645	1.03209	0.865237	1.5947	0.0784891	1.49674	0.124953
A_23_P114221	-1.0191	0.864891	-1.1806	0.229293	-1.8394	0.00231046
A_23_P165727	-1.04604	0.864766	-1.16889	0.675164	-1.97906	0.070336
A_24_P220984	-1.02869	0.86412	-1.16975	0.423913	-1.69961	0.0199477
A_24_P397817	-1.02544	0.863503	-1.37654	0.0485093	-1.84368	0.000489565
A_23_P48637	-1.02444	0.862842	1.63411	0.0018331	1.20887	0.0458189
A_23_P427622	1.03053	0.861976	-1.0249	0.932216	-1.707	0.0400541
A_23_P67042	1.01758	0.861976	-1.03499	0.86223	1.80443	0.00782338
A_24_P941090	1.01781	0.861631	-1.02619	0.875376	-1.67306	0.00566777
A_24_P809567	1.03294	0.861314	-1.59231	0.0504814	-1.87662	0.0133275
A_23_P46819	1.02609	0.859952	1.38259	0.0852189	1.98854	0.00569353
A_23_P21324	1.02156	0.859076	-1.04651	0.806691	1.76259	0.00679144
A_24_P32986	-1.01881	0.856494	-1.03187	0.839493	1.51435	0.0126587
A_24_P85258	-1.02489	0.856494	1.28946	0.114171	1.80375	0.00610337
A_24_P219108	1.02062	0.856034	1.34696	0.0435275	2.48141	0.000449353
A_23_P115838	-1.02448	0.855941	-1.23423	0.223736	-2.74657	0.000712089
A_32_P158019	1.0221	0.855646	1.14483	0.398731	1.55991	0.0169211
A_23_P217258	-1.04291	0.855431	-1.2312	0.486286	-1.86691	0.0559366
A_32_P68443	1.01436	0.855185	1.22131	0.0620447	2.38396	0.000118558
A_23_P63057	1.02257	0.854903	-1.1113	0.537898	1.93698	0.00447831
A_23_P13899	1.03137	0.854506	1.29507	0.231571	1.891	0.016168
A_23_P29555	-1.02475	0.854469	-1.03015	0.892482	-1.63528	0.0222787
A_24_P194714	1.01927	0.854428	-1.04756	0.772346	-1.63786	0.00652816
A_23_P144521	-1.08086	0.854428	-2.01051	0.203436	-3.66358	0.0376519
A_23_P207221	1.02055	0.85382	1.08387	0.5961	1.50897	0.0186435
A_24_P280983	1.03387	0.852994	1.40717	0.156127	1.72927	0.0430347
A_23_P14216	-1.02023	0.852928	1.09433	0.548872	-1.50975	0.0163406
A_24_P205268	1.01174	0.852928	1.47687	0.00232487	1.87291	0.000129955
A_24_P661593	1.0573	0.85287	-2.0994	0.0636696	-2.56769	0.0313309
A_23_P40785	1.02842	0.852847	1.20292	0.330387	1.69534	0.0209994
A_23_P98898	-1.04292	0.852602	-1.49237	0.01056	-1.71627	0.00276809
A_23_P428548	1.02521	0.852319	-1.02342	0.916839	1.5577	0.0280789
A_24_P358302	-1.02921	0.852167	1.3182	0.186119	1.62262	0.0392979
A_24_P127978	1.02697	0.851797	1.61248	0.0337708	-1.30487	0.179617
A_24_P829209	-1.01907	0.851306	1.0205	0.90492	-1.82666	0.00272443
A_23_P206212	1.01571	0.850981	-1.43029	0.00474423	1.71887	0.00453604
A_24_P144556	1.01774	0.84963	1.29854	0.0362291	-1.74173	0.00130237
A_32_P218030	-1.02768	0.849472	1.11941	0.524003	1.62047	0.0199135
A_23_P29067	-1.02103	0.849404	-1.0929	0.543043	1.57591	0.011443
A_23_P40315	-1.01394	0.847436	1.10385	0.253576	1.64517	0.000916924
A_23_P26386	1.01754	0.84676	1.3934	0.0158672	1.89698	0.00077854
A_32_P192430	-1.03014	0.846238	-1.111	0.632768	-1.55281	0.0560311
A_23_P1206	1.03896	0.846238	1.26997	0.353019	-1.81188	0.0410525
A_24_P807248	1.01736	0.84622	-1.04249	0.7603	1.53884	0.00722769
A_24_P362540	1.01341	0.845663	-1.07988	0.311462	-1.61623	0.000459157
A_23_P60120	-1.04346	0.844723	1.15168	0.623085	-1.64271	0.0870266
A_24_P866484	-1.03769	0.844482	1.04687	0.8813	-2.11929	0.0160388
A_24_P415959	1.02705	0.843484	-1.15225	0.454639	2.05333	0.0034126
A_23_P426292	-1.01817	0.843484	-1.29918	0.0501329	1.61955	0.00387197
A_32_P151269	-1.02317	0.843156	-1.6683	0.00966497	1.09531	0.551279
A_23_P24755	-1.02798	0.841148	-1.04186	0.836826	1.61818	0.0196439
A_24_P418044	-1.07105	0.840325	1.51959	0.00240165	2.70041	5.31055e-05
A_23_P26810	1.01991	0.840023	-1.17842	0.0774705	-2.45799	0.000844548
A_24_P240242	1.03104	0.839466	1.25889	0.239549	1.94467	0.00940686
A_32_P69166	-1.05963	0.839264	-1.45622	0.339822	-2.07999	0.0747459
A_32_P164593	-1.02478	0.838542	1.06862	0.697946	1.94485	0.00303575
A_24_P357386	1.03726	0.83804	1.05514	0.850774	-2.00512	0.0166279
A_23_P99837	-1.01545	0.837909	1.0935	0.388095	-2.14496	0.000224499
A_23_P28075	1.01767	0.837887	1.23167	0.0887615	-1.60789	0.0033128
A_32_P28158	1.04752	0.837669	-1.20741	0.559899	-1.84049	0.0720964
A_24_P920748	1.02538	0.837563	1.17678	0.331203	-1.54029	0.0267514
A_24_P170538	1.01916	0.837412	-1.04394	0.715622	-1.54292	0.00433343
A_24_P33595	1.01798	0.837268	-1.04429	0.721566	-1.76669	0.00136499
A_23_P12079	-1.02811	0.837268	-1.15002	0.421765	-3.23631	0.000415433
A_23_P502464	1.0146	0.837268	-1.19496	0.104528	1.64334	0.00148214
A_23_P5551	1.05138	0.836995	1.62579	0.115182	1.80657	0.0735969
A_24_P25698	1.02859	0.83684	-1.04732	0.834649	1.51707	0.0471293
A_32_P171124	1.03642	0.83684	1.42926	0.13928	1.72395	0.0364449
A_24_P323944	1.02456	0.836383	-1.19996	0.185493	2.2245	0.000855972
A_23_P146339	-1.01481	0.835759	1.45613	0.00295023	2.28998	8.02697e-05
A_24_P898945	1.05865	0.834973	-1.05205	0.91145	2.04224	0.060191
A_24_P384569	1.04764	0.834832	1.12746	0.688872	1.9581	0.0344999
A_32_P220523	-1.01643	0.834832	-1.11193	0.232597	-1.87685	0.000315453
A_24_P280868	1.04386	0.834453	-1.01455	0.96967	-1.67756	0.0864157
A_23_P140821	-1.03165	0.834447	-1.241	0.293749	-1.92809	0.00831441
A_24_P386746	-1.03249	0.833977	-1.19403	0.403094	-1.57811	0.0497776
A_23_P120442	-1.02309	0.833406	-1.32342	0.0504985	-1.51687	0.00948333
A_32_P843613	1.03182	0.833335	1.04693	0.835999	-1.87327	0.00977179
A_24_P222165	1.04103	0.832253	-1.00747	0.981134	-1.89745	0.0202575
A_23_P209995	-1.01775	0.831788	-1.02767	0.801899	1.53567	0.00258838
A_23_P26824	1.01971	0.831593	-1.22276	0.0930311	-2.19283	0.00032259
A_32_P179964	1.02824	0.831593	1.49458	0.0325509	-1.59096	0.0185799
A_24_P313397	1.03098	0.831198	1.13529	0.54734	1.57261	0.0416497
A_23_P70849	-1.01785	0.831052	1.53973	0.00378712	-1.95459	0.00146155
A_23_P17724	1.04667	0.830614	-1.00223	0.995632	1.78246	0.0624941
A_23_P74701	-1.03454	0.830521	-1.46276	0.0852834	-1.50603	0.0704361
A_24_P582056	-1.03753	0.830334	-1.97662	0.0157046	-1.44504	0.113901
A_23_P3413	-1.01691	0.829984	1.03515	0.73045	1.5986	0.00143608
A_23_P11262	-1.02796	0.829984	-1.46551	0.024919	-2.19783	0.0011838
A_23_P55738	-1.0289	0.829826	-1.08558	0.672457	-1.68005	0.0159468
A_24_P916182	1.02144	0.829816	1.22416	0.133392	2.11685	0.000674811
A_32_P205973	1.06001	0.829791	-1.07497	0.867473	2.42153	0.0356905
A_23_P19102	1.06239	0.829703	2.01863	0.0747882	1.26407	0.530743
A_32_P45309	-1.01567	0.829467	-1.24224	0.0270673	-2.94373	3.75704e-05
A_23_P207245	-1.0569	0.829294	1.091	0.830551	-2.13295	0.0484096
A_32_P80231	-1.03258	0.829294	-1.32181	0.122517	-1.82253	0.00781327
A_23_P202658	-1.09407	0.829294	-1.51145	0.0138455	1.55219	0.00609779
A_23_P4041	-1.03271	0.8272	1.04319	0.858687	-1.55442	0.0507342
A_23_P329573	1.01446	0.8272	1.26449	0.00615807	-1.74475	0.00474784
A_32_P38404	-1.03865	0.825189	1.12795	0.617286	2.29149	0.00677838
A_24_P324630	1.01436	0.824216	1.42417	0.00412394	1.51696	0.00163666
A_32_P105825	1.02699	0.823951	1.54668	0.0220646	-1.03282	0.852104
A_24_P929279	1.02108	0.822763	1.02237	0.866665	1.66899	0.00240455
A_23_P73801	-1.02794	0.822725	-1.31134	0.120411	1.61669	0.0188385
A_32_P188388	1.01923	0.822725	1.24448	0.0644123	1.6524	0.00267807
A_23_P390157	-1.01371	0.822725	-1.61171	0.000831643	-1.16011	0.0483867
A_24_P101694	1.04162	0.822555	-1.52733	0.0950046	-1.60254	0.078193
A_24_P916992	1.03168	0.822209	1.18575	0.38413	1.5817	0.0368897
A_23_P502142	1.01965	0.82065	1.23822	0.00804238	-1.68467	0.00037205
A_23_P139228	-1.07177	0.819802	-1.53459	0.281102	-2.10877	0.0839938
A_23_P200838	-1.02482	0.819735	1.33882	0.0453233	1.97901	0.00147855
A_23_P74081	1.02287	0.819735	1.57703	0.0069368	-1.64889	0.000412445
A_24_P93111	-1.03511	0.818665	-1.02045	0.933636	1.52727	0.0497521
A_23_P155265	1.01657	0.818187	-1.03204	0.732928	1.72187	0.000511876
A_23_P204801	1.01802	0.817478	2.05459	0.000872203	-1.27479	0.0323206
A_24_P222114	-1.02592	0.817204	1.02487	0.895376	-1.87456	0.00338063
A_23_P391238	-1.04144	0.817204	1.05583	0.843816	-1.7024	0.0405429
A_24_P407373	-1.0359	0.817204	1.04676	0.841098	2.32606	0.00321687
A_24_P288979	1.07328	0.817142	-1.80757	0.127583	-2.50279	0.036984
A_24_P281009	1.02129	0.817107	1.68349	0.00400983	-1.06873	0.577133
A_23_P72096	1.0198	0.817077	1.40709	0.0435314	1.98027	0.0167109
A_24_P642771	1.02461	0.816878	-1.20902	0.212916	-1.91199	0.00246645
A_24_P406525	1.02783	0.816176	-1.01243	0.951619	1.53141	0.0224654
A_24_P59220	-1.02411	0.815939	-1.11225	0.396531	-1.75011	0.00272432
A_24_P161317	-1.02342	0.815733	1.04239	0.788056	-1.73091	0.00372494
A_23_P84475	-1.04834	0.81562	-2.03506	0.0171221	-3.4859	0.00152456
A_24_P250922	-1.01288	0.814865	-1.11384	0.225973	-1.84505	0.000755127
A_24_P814872	1.0245	0.814324	1.01649	0.920861	-1.56232	0.00907311
A_23_P351320	1.02435	0.814324	1.57363	0.0109447	1.23983	0.136141
A_23_P83976	1.03708	0.814307	1.10568	0.673942	1.54128	0.0661221
A_23_P11353	1.03242	0.814237	1.26139	0.204012	1.6107	0.0252143
A_23_P365705	-1.06797	0.813434	-1.67377	0.139166	-2.25949	0.038981
A_24_P930690	-1.02644	0.813142	-1.03459	0.827678	1.5693	0.00812487
A_24_P496034	-1.03152	0.813065	-1.03539	0.86915	1.76373	0.011939
A_24_P324606	1.02309	0.81261	1.73019	0.00406145	1.8135	0.00175081
A_23_P107238	1.02957	0.812326	-1.37381	0.0428987	-2.05554	0.00156841
A_23_P326913	-1.03073	0.811973	1.11744	0.540123	1.6043	0.0214511
A_23_P148194	1.02058	0.811265	1.18117	0.195654	1.53446	0.00554299
A_24_P290046	1.01357	0.810054	1.16839	0.0513563	-1.57641	0.000475444
A_32_P22654	1.02021	0.810027	1.18056	0.146987	1.50074	0.00589074
A_23_P32793	1.01661	0.809966	1.34882	0.0113091	1.5786	0.00164052
A_23_P84705	1.03963	0.809351	-1.60711	0.0501329	1.49859	0.0870255
A_23_P60339	1.03888	0.808392	1.56033	0.0499874	1.62922	0.034992
A_23_P329573	-1.03702	0.807541	1.26449	0.00615807	-1.74475	0.00474784
A_24_P227375	1.05297	0.80688	-1.64976	0.0806833	-2.00127	0.0306667
A_24_P126282	1.01996	0.806794	1.07857	0.440479	1.53284	0.00299408
A_23_P14957	-1.02617	0.806354	1.34288	0.069257	1.65511	0.00798173
A_24_P233995	-1.05137	0.806038	1.31159	0.344033	1.67085	0.089984
A_24_P274270	-1.0205	0.805938	1.14188	0.425661	-2.91666	0.000541946
A_32_P113472	1.0202	0.805938	1.60793	0.00140666	2.39345	8.05128e-05
A_24_P169073	1.04293	0.805782	-1.2996	0.240034	-1.84611	0.0206939
A_23_P136870	-1.03446	0.805325	-1.2437	0.148453	-1.54391	0.015258
A_24_P550924	-1.01658	0.804682	1.0874	0.368641	1.7885	0.000411562
A_23_P206212	-1.01848	0.80451	-1.43029	0.00474423	1.71887	0.00453604
A_24_P303974	1.01988	0.803548	1.0363	0.75008	-1.52568	0.00220569
A_23_P99226	1.02528	0.803548	1.18465	0.226745	1.54737	0.0109892
A_24_P794024	1.03902	0.803548	1.68989	0.0324517	-1.17166	0.462944
A_23_P406889	-1.02047	0.803514	-1.20175	0.053925	-1.98119	0.000264067
A_23_P34527	-1.03468	0.802906	-1.04328	0.84679	-1.60843	0.0283795
A_23_P10385	1.02726	0.801374	1.36051	0.0447369	1.63049	0.000351229
A_23_P121885	-1.05156	0.800703	1.10518	0.7384	1.77221	0.0547026
A_32_P34926	-1.04139	0.800633	-1.00325	0.991278	2.01429	0.0112357
A_23_P72096	1.02998	0.799947	1.40709	0.0435314	1.98027	0.0167109
A_23_P203150	1.06159	0.799427	-2.23249	0.0242065	-2.77729	0.00900469
A_23_P65629	-1.03372	0.799336	-1.5225	0.024919	-1.12505	0.432649
A_23_P31489	-1.03338	0.798105	1.44149	0.0504957	1.87651	0.00634879
A_24_P222599	1.0348	0.797003	-1.72276	0.018428	-1.19671	0.336806
A_23_P114814	1.02574	0.796323	-1.00551	0.976133	1.58844	0.00693353
A_23_P361744	-1.04724	0.796062	-1.03308	0.918387	1.55901	0.0929941
A_23_P201605	-1.02288	0.796041	-1.30754	0.0262386	-1.65037	0.0016429
A_24_P56388	-1.02157	0.795855	-1.57166	0.090773	-1.41224	0.189868
A_24_P287785	1.04346	0.795546	-1.00143	0.996488	-1.6565	0.037198
A_24_P68814	1.03658	0.795494	1.01986	0.928676	-1.51646	0.0359557
A_23_P23356	-1.02858	0.794339	1.23441	0.143298	1.98169	0.00150077
A_24_P825942	1.02995	0.793909	-1.40249	0.0274284	-2.75947	0.000277174
A_24_P56388	-1.04898	0.793697	-1.57166	0.090773	-1.41224	0.189868
A_32_P217128	1.04308	0.792768	-1.29591	0.208152	-2.35993	0.00375939
A_24_P733223	-1.02839	0.792768	1.26436	0.10453	1.76	0.00443756
A_23_P66767	-1.04853	0.792768	1.54709	0.0994344	1.15425	0.577929
A_24_P583972	1.08085	0.792768	-2.08738	0.0706501	-2.55259	0.0356556
A_32_P795513	-1.02976	0.79239	1.04845	0.777862	-2.50398	0.00050611
A_23_P394972	-1.02362	0.792307	1.62693	0.0050164	1.35952	0.0248571
A_23_P321052	1.04605	0.790306	1.04409	0.889917	1.67329	0.0513649
A_23_P83134	-1.05172	0.790202	1.03315	0.92228	-1.93439	0.0296813
A_24_P221770	-1.05947	0.790202	-1.05991	0.863314	1.93514	0.0401519
A_23_P52888	-1.05319	0.790135	-1.17756	0.527401	1.60722	0.0801832
A_23_P211196	-1.02341	0.790066	1.32219	0.0278377	1.7497	0.0012067
A_32_P147790	-1.05587	0.789678	1.91599	0.034247	1.44753	0.18596
A_24_P324644	-1.03235	0.78944	1.10812	0.525068	1.56816	0.018289
A_32_P159334	1.06652	0.788584	-1.06971	0.853189	1.90981	0.0566828
A_23_P69988	1.02199	0.788471	1.0965	0.403173	1.72955	0.00168515
A_24_P297302	1.0196	0.787891	-1.06096	0.585232	1.57054	0.00163173
A_23_P67278	1.02638	0.787865	1.01424	0.932674	1.82934	0.00192029
A_23_P28857	1.05477	0.786922	-1.10694	0.723982	-2.21459	0.0145213
A_24_P709536	1.02416	0.786922	-1.0781	0.548718	2.06187	0.000647557
A_32_P232543	-1.07603	0.786762	-2.01378	0.0522791	-3.02542	0.0100877
A_24_P827738	1.08575	0.785568	-1.4103	0.388325	-2.30533	0.0582671
A_24_P288149	1.0452	0.785151	1.31425	0.201844	1.98508	0.0111798
A_24_P347065	1.0252	0.784401	1.169	0.171064	2.05069	0.000480309
A_23_P69491	1.02641	0.783419	1.35901	0.070306	-1.51804	0.00299968
A_23_P10385	-1.05384	0.783295	1.36051	0.0447369	1.63049	0.000351229
A_23_P350451	-1.07444	0.783272	1.05672	0.899745	-2.19892	0.0493241
A_24_P880143	-1.04254	0.782943	1.00283	0.992276	-1.92838	0.0117887
A_23_P14464	-1.06029	0.78288	-1.32231	0.325861	-1.91379	0.0384116
A_23_P19061	-1.06329	0.782526	1.36612	0.310793	1.78473	0.0827829
A_23_P368251	1.04617	0.782419	1.06176	0.804266	2.03378	0.00915151
A_32_P150891	-1.0295	0.782247	1.50874	0.0233677	1.03791	0.811561
A_24_P241792	1.02216	0.782247	1.44233	0.00804238	1.85898	0.00042398
A_32_P127961	-1.03072	0.78166	1.51292	0.0228763	1.22275	0.174316
A_24_P888941	-1.02417	0.781347	1.16204	0.208633	1.55154	0.00653347
A_24_P365025	1.03335	0.781089	-1.05388	0.780405	-1.85148	0.00516116
A_24_P798431	-1.01703	0.781043	1.13233	0.113016	1.5175	0.000608589
A_23_P139207	-1.02075	0.78034	1.57549	0.00179255	1.67983	0.000532091
A_23_P347632	-1.05034	0.779855	-1.18173	0.475317	-1.5594	0.0762057
A_23_P48637	-1.07642	0.779855	1.63411	0.0018331	1.20887	0.0458189
A_32_P98752	1.05934	0.779247	1.3658	0.279235	-2.17798	0.0239159
A_24_P84498	-1.06832	0.779227	-1.05946	0.882687	-1.76161	0.0978135
A_24_P918266	-1.03158	0.777819	1.10439	0.50843	1.72	0.005741
A_23_P256965	-1.03176	0.777819	-1.12547	0.415664	2.40829	0.00058962
A_24_P148503	-1.02449	0.777792	-1.03087	0.818951	-1.75285	0.00156512
A_23_P333029	1.05228	0.77626	1.00323	0.992075	1.55221	0.0666094
A_24_P93452	1.04724	0.775629	-1.28636	0.213915	-1.76607	0.0170771
A_32_P156531	1.04169	0.775629	-1.59897	0.027402	-1.05433	0.787398
A_24_P281025	-1.02741	0.774127	1.02845	0.853282	-1.51563	0.0099209
A_23_P100595	1.01527	0.773081	1.08803	0.274086	1.60945	0.000411241
A_23_P417753	-1.027	0.772701	-1.68343	0.00345191	-1.67728	0.00282314
A_23_P65757	1.02509	0.77248	1.12886	0.243683	-1.53656	0.00329767
A_23_P251342	-1.03018	0.771122	-1.23675	0.10149	-1.51085	0.001395
A_23_P337242	1.05401	0.77088	-1.09164	0.764346	1.6545	0.0691626
A_23_P135730	1.0297	0.77088	1.16076	0.261415	1.78077	0.00288944
A_23_P41470	1.07068	0.770799	-2.29756	0.0249016	-3.91812	0.00326319
A_24_P290856	-1.04286	0.770545	-1.13639	0.513028	-1.73407	0.0169574
A_23_P405267	1.03476	0.770495	-1.28726	0.111664	-1.60391	0.0145083
A_23_P104464	1.05115	0.770495	1.50795	0.0962612	1.49365	0.114892
A_23_P502750	1.04087	0.770084	-1.37709	0.101889	-1.90504	0.002343
A_23_P77847	-1.14143	0.768956	-1.13065	0.337511	1.65025	0.0313582
A_24_P350457	-1.02284	0.76885	1.03879	0.724603	1.54234	0.00188375
A_23_P161968	-1.02839	0.768037	1.01638	0.922428	-1.67353	0.00450711
A_24_P30034	1.02988	0.768037	1.51167	0.0128669	1.34815	0.0386322
A_24_P936875	-1.05298	0.767134	-2.06914	0.0104828	-3.76459	0.000715478
A_24_P842172	1.02517	0.766401	-1.05267	0.682506	1.55727	0.00512608
A_23_P44235	-1.02645	0.766388	1.5905	0.00704338	-1.01628	0.900123
A_24_P179183	1.10737	0.765595	1.28854	0.6242	3.03858	0.0406486
A_24_P50759	-1.05035	0.763461	1.50576	0.00197762	1.74455	0.000302407
A_24_P37253	1.01911	0.763442	-1.20403	0.0355289	1.50792	0.00136499
A_32_P62211	1.03782	0.763096	1.32769	0.0860644	1.60652	0.0147383
A_23_P215956	-1.05689	0.762926	-1.13048	0.105208	-1.70556	0.000344684
A_32_P135601	-1.049	0.762904	1.2038	0.4075	1.64762	0.0462583
A_24_P32252	-1.02835	0.76185	-1.10511	0.433092	1.558	0.00694713
A_23_P431591	1.08515	0.761576	-1.19198	0.666551	2.03148	0.0766251
A_23_P211522	1.03583	0.761304	1.16873	0.282687	2.2992	0.000933909
A_32_P381957	1.03241	0.761294	1.0157	0.928876	-1.52423	0.0123115
A_23_P15937	1.04118	0.761044	-1.04685	0.827974	-1.82145	0.00211387
A_32_P320247	1.04148	0.760598	-1.15961	0.425711	1.66698	0.0188553
A_23_P171255	-1.06188	0.760457	-1.02104	0.950885	1.79111	0.045368
A_23_P125451	1.07248	0.760457	1.17914	0.0741699	-1.9053	0.0424415
A_24_P934184	1.03056	0.759581	1.53373	0.0113974	1.93756	0.00110555
A_23_P500824	1.0226	0.758808	-1.21943	0.0644123	-1.52978	0.00270829
A_24_P364236	1.0246	0.758691	-1.62738	0.00245617	-2.13224	0.000270122
A_23_P376591	-1.03617	0.758662	1.12854	0.426552	1.73077	0.00689467
A_23_P30122	-1.05049	0.758652	-2.23216	0.00383778	-2.16568	5.31055e-05
A_23_P67042	-1.03866	0.757701	-1.03499	0.86223	1.80443	0.00782338
A_32_P9151	-1.07562	0.757701	-1.19745	0.61117	-2.46198	0.0236037
A_24_P104538	-1.02485	0.757545	1.00207	0.988334	-1.5358	0.00214329
A_24_P383080	1.04712	0.757414	1.03155	0.902147	1.51419	0.0618714
A_23_P50195	1.0418	0.755915	1.17526	0.374208	1.53201	0.0356967
A_32_P148780	1.05937	0.755794	-1.0126	0.972106	1.96948	0.0277283
A_23_P87879	-1.02329	0.755794	-1.23147	0.0543521	2.22982	0.00161483
A_23_P103361	1.05802	0.755122	1.36367	0.0738822	-1.81414	0.0140245
A_23_P66481	1.02359	0.755122	-1.27387	0.0342644	-1.75257	0.000674811
A_23_P33141	-1.03983	0.755061	-1.19524	0.284332	-2.10079	0.00191213
A_23_P215956	-1.09189	0.7546	-1.13048	0.105208	-1.70556	0.000344684
A_24_P646172	-1.05462	0.75455	-1.05776	0.836514	-2.11786	0.0108687
A_23_P417965	1.03047	0.754478	-1.16034	0.21515	-1.66534	0.00346189
A_23_P161152	-1.05638	0.754066	1.04708	0.878412	1.6256	0.0692523
A_24_P217834	1.05159	0.753781	1.09394	0.707414	-1.52534	0.075223
A_23_P218646	1.0295	0.753449	-1.00488	0.975583	1.75416	0.00186543
A_23_P253561	1.04121	0.753449	-1.56992	0.0357564	1.22912	0.229139
A_23_P219105	1.04309	0.753443	-1.0041	0.986638	-1.50405	0.0434146
A_23_P109643	-1.05962	0.753151	-1.32463	0.256343	-1.73293	0.0475029
A_23_P307502	-1.07177	0.75257	-1.3997	0.279425	-2.284	0.0241618
A_24_P161184	-1.03611	0.752378	-1.17889	0.256716	1.9525	0.00180458
A_32_P68350	1.04284	0.752378	1.67678	0.0208863	1.20999	0.310931
A_23_P48637	-1.06032	0.752273	1.63411	0.0018331	1.20887	0.0458189
A_23_P371777	-1.04955	0.75132	2.11135	0.0384749	2.27596	0.0252497
A_24_P414419	-1.07109	0.751207	-2.10502	0.0196642	-3.63625	0.00191325
A_24_P915245	1.0323	0.751115	1.06734	0.654654	1.5181	0.00784188
A_24_P752496	-1.06382	0.750869	-1.51215	0.115031	-1.57928	0.0972131
A_23_P62227	1.0192	0.750277	-1.00316	0.977412	-1.61838	0.000700705
A_24_P277673	-1.01961	0.750277	-1.03863	0.544939	1.62577	0.000231687
A_23_P137865	1.02344	0.750277	-1.42323	0.00543577	-1.69535	0.000792874
A_32_P103508	1.02677	0.750277	2.46501	0.000851347	1.2198	0.0952734
A_23_P331770	1.04688	0.749873	-1.68133	0.032566	1.21277	0.315199
A_23_P250813	-1.04038	0.74978	1.25437	0.133392	-1.55175	0.0307553
A_24_P372223	-1.03859	0.749573	1.22153	0.20739	1.83617	0.00474228
A_23_P335329	1.03549	0.749342	1.56496	0.0115498	1.39128	0.0381082
A_24_P940776	-1.02922	0.748784	-1.27267	0.0755864	-2.12352	0.000730144
A_24_P923510	-1.05748	0.747762	-1.11395	0.679716	-1.82221	0.0318971
A_24_P929570	1.03014	0.74776	1.32516	0.0407675	-1.52826	0.00644428
A_24_P33444	-1.02374	0.747658	-1.25847	0.0283403	-1.51975	0.00149551
A_24_P99679	-1.0808	0.747658	-2.14638	0.00521383	-2.09857	0.00388963
A_24_P23951	1.01882	0.747371	1.01761	0.859072	1.64292	0.000508115
A_23_P250196	1.06688	0.747149	1.22643	0.0215143	-1.51082	0.00226298
A_24_P265003	1.03721	0.747149	1.57107	0.0183189	1.16696	0.319378
A_24_P24256	-1.02349	0.747075	1.56568	0.00342874	1.2148	0.0647053
A_23_P217409	1.0187	0.746635	1.02053	0.805059	1.8783	0.000111258
A_23_P8142	-1.03257	0.746635	1.20147	0.176383	-1.74561	0.0034617
A_23_P204472	-1.03034	0.745774	-1.69736	0.00321975	-1.57583	0.00216338
A_24_P808720	-1.08379	0.744815	1.04602	0.917235	-1.8937	0.0849494
A_23_P98898	-1.06064	0.744244	-1.49237	0.01056	-1.71627	0.00276809
A_23_P60016	1.01969	0.744211	1.54304	0.00150834	1.54123	0.000649477
A_23_P153286	-1.04608	0.743353	1.37552	0.112008	1.53632	0.049744
A_32_P223422	-1.03801	0.743133	-1.0701	0.701707	1.69972	0.00933159
A_23_P151150	1.03099	0.742504	-1.13119	0.31572	1.66418	0.00391326
A_23_P154522	-1.0663	0.74246	-2.08043	0.0113353	-3.57537	0.000978718
A_24_P915095	-1.05507	0.74222	-1.11529	0.636673	-1.72237	0.030766
A_32_P100076	-1.10388	0.74222	-1.78446	0.160352	-3.85214	0.0105265
A_23_P416036	1.05146	0.741082	1.49383	0.077636	2.04325	0.00864074
A_24_P562369	1.02235	0.740671	-1.03807	0.720405	-1.84484	0.000473469
A_23_P146644	1.05507	0.740613	1.65222	0.047179	1.26171	0.31374
A_23_P31348	1.03552	0.740567	-1.02675	0.86785	2.00673	0.00138023
A_23_P387552	1.02561	0.740007	1.54584	0.00501036	1.14448	0.19711
A_23_P408473	1.0453	0.739344	-1.03464	0.868113	-1.51549	0.0363204
A_32_P102750	-1.05131	0.73853	-1.02049	0.936094	2.19661	0.00313055
A_23_P152926	1.02071	0.738258	1.1849	0.0584614	1.51104	0.00143186
A_23_P374695	1.0488	0.73824	1.05704	0.8163	2.28098	0.00406543
A_24_P171058	-1.021	0.73824	1.02259	0.797545	1.7409	0.000240763
A_23_P697	-1.02781	0.737421	1.09577	0.347843	1.64369	0.00123866
A_24_P221414	-1.0305	0.737344	1.09744	0.414447	1.90607	0.00079238
A_23_P215790	-1.08295	0.737344	-1.76444	0.0271942	-3.82554	0.000233729
A_23_P114862	-1.03252	0.737344	-1.5545	0.0066731	-1.11888	0.327982
A_24_P179339	1.0605	0.737236	-1.0624	0.829504	1.70528	0.04421
A_24_P367259	1.05864	0.736811	1.19673	0.440424	2.28191	0.00698562
A_23_P78585	-1.04492	0.736192	-1.20835	0.308334	1.52492	0.0323548
A_32_P933041	-1.06155	0.736043	1.92421	0.0266614	1.28077	0.317363
A_32_P725535	1.02336	0.735689	-1.20095	0.0378505	1.71832	0.000430521
A_24_P938254	1.05214	0.735028	-1.03284	0.899473	1.56631	0.0507342
A_23_P53957	1.04826	0.734882	-1.00864	0.969423	-1.71757	0.011031
A_23_P79816	1.06774	0.73292	1.18351	0.512728	2.13919	0.0107453
A_24_P288424	1.05086	0.73292	1.68223	0.025036	1.38546	0.113999
A_32_P101653	-1.05069	0.731869	-1.20718	0.345944	-1.56322	0.0435134
A_24_P239017	-1.05247	0.731709	1.18161	0.423307	1.95651	0.00688717
A_23_P108734	1.07214	0.731709	-1.31609	0.334244	-2.19203	0.0200381
A_24_P940275	-1.02559	0.730785	-1.29857	0.0191246	-1.82681	0.000321831
A_23_P82402	-1.05271	0.729377	-1.02025	0.937005	-1.59769	0.0356967
A_23_P161386	1.04416	0.728051	2.25289	0.00201356	2.39978	0.000938315
A_32_P118942	1.03138	0.72736	-1.04045	0.768332	1.55751	0.00386488
A_32_P162716	-1.0294	0.727312	1.02323	0.847875	-1.88667	0.00065677
A_23_P124044	1.05477	0.727146	1.59773	0.0505208	1.54863	0.0659665
A_24_P230907	1.0225	0.727138	-1.21211	0.0234066	-1.70388	0.000277389
A_24_P567925	1.09793	0.725225	1.48037	0.300366	2.48402	0.0370577
A_24_P332364	-1.06902	0.724876	1.2795	0.337511	-2.889	0.00367656
A_23_P204721	-1.08472	0.723984	-1.28395	0.437519	-2.46025	0.019775
A_23_P60306	-1.0622	0.723683	2.12134	0.00303372	1.4184	0.00482696
A_24_P928208	-1.04214	0.722538	1.31062	0.0620196	2.11606	0.000954113
A_23_P15937	-1.05622	0.722158	-1.04685	0.827974	-1.82145	0.00211387
A_24_P170247	1.0673	0.721556	-1.06148	0.840726	-1.63869	0.0737731
A_23_P25849	1.07995	0.721423	1.12328	0.723982	1.87362	0.0526992
A_23_P110787	1.0704	0.721423	1.15019	0.601399	1.73879	0.0508523
A_32_P56759	-1.05062	0.720611	-1.09928	0.656617	-1.59326	0.0352869
A_24_P884696	-1.03171	0.72022	1.02268	0.882715	2.00156	0.000771919
A_23_P366983	1.10335	0.720002	-2.10295	0.0594221	-2.47263	0.0339001
A_24_P29641	-1.07222	0.719416	1.26094	0.272723	-1.84191	0.0181254
A_24_P734297	1.04294	0.719416	1.87092	0.0069368	1.59418	0.0207503
A_32_P180185	1.05178	0.719388	1.51361	0.0573451	1.49035	0.0675215
A_24_P761490	1.02863	0.71934	-1.14808	0.205776	1.55256	0.00375432
A_23_P502142	1.05283	0.719321	1.23822	0.00804238	-1.68467	0.00037205
A_23_P413193	1.04436	0.718403	1.52203	0.0110881	-1.27962	0.0780693
A_23_P53126	1.09246	0.71835	-1.26612	0.0467546	-2.20946	0.000256825
A_24_P126873	1.03425	0.718338	1.53319	0.0059972	-1.13127	0.253357
A_24_P332647	1.05387	0.717848	-1.30355	0.138679	-2.04467	0.0040744
A_24_P250922	-1.07503	0.717639	-1.11384	0.225973	-1.84505	0.000755127
A_23_P6252	-1.06568	0.7175	-1.08224	0.777862	-2.10798	0.0146032
A_23_P397285	1.04326	0.717495	1.39902	0.0537127	1.5646	0.0180511
A_32_P6575	1.04281	0.717405	-1.04635	0.810614	-1.50503	0.030701
A_24_P388252	-1.02999	0.71727	1.01486	0.909294	-1.68338	0.00143903
A_24_P565908	-1.0381	0.716558	1.06109	0.723982	1.74189	0.00569353
A_32_P144887	-1.03591	0.714843	1.10228	0.447247	1.711	0.00349616
A_23_P342600	1.02959	0.714601	1.10249	0.396531	1.57582	0.00388262
A_24_P913096	1.04223	0.714487	1.43262	0.0393079	1.78711	0.00633719
A_23_P29939	1.03346	0.714317	1.24935	0.048282	1.50417	0.000614107
A_23_P216429	-1.05326	0.713696	-1.22245	0.292648	-1.64459	0.0276227
A_23_P80508	-1.04772	0.713696	-1.52587	0.0373487	1.10692	0.584039
A_32_P36778	-1.03209	0.713696	-1.32415	0.0259385	-1.64446	0.0016429
A_23_P329573	-1.0355	0.713473	1.26449	0.00615807	-1.74475	0.00474784
A_23_P72961	1.04468	0.713435	1.57679	0.0257182	1.16059	0.386065
A_32_P200600	-1.05067	0.713381	1.5718	0.0246225	-1.41857	0.065109
A_23_P46539	-1.04143	0.712929	1.59844	0.0144459	1.83433	0.00411851
A_23_P30024	-1.03798	0.712686	-1.63492	0.00717345	-1.50794	0.00105159
A_24_P920157	1.04003	0.71265	-1.00579	0.978169	-1.7737	0.00437175
A_24_P917154	-1.05134	0.71265	-1.30369	0.179942	-1.75922	0.0174989
A_23_P213359	1.04969	0.711848	1.0538	0.812471	1.56095	0.0366126
A_23_P250800	-1.06269	0.711348	1.40061	0.047986	1.59365	0.0144994
A_24_P213956	1.04304	0.711239	-1.2519	0.154561	1.50975	0.0240094
A_23_P418493	-1.06072	0.711104	-1.1787	0.372727	-1.89402	0.00830685
A_24_P454931	-1.0615	0.710853	-1.51626	0.0694328	-1.43086	0.110923
A_23_P8558	-1.06651	0.71018	-1.42419	0.130768	-2.6156	0.00378517
A_23_P16573	1.04228	0.71008	1.11487	0.505126	1.58689	0.0124839
A_23_P128868	-1.04831	0.709575	-1.50518	0.0244635	-1.63466	0.0100275
A_24_P217330	-1.07083	0.709478	-1.60775	0.067582	-2.1444	0.0134881
A_23_P112296	1.05251	0.709472	1.59955	0.0344323	1.91092	0.0105353
A_32_P48498	-1.05868	0.709397	-1.22603	0.316715	-1.50421	0.0538142
A_23_P89249	1.03126	0.70928	-1.22468	0.0638672	1.76106	0.00613381
A_23_P90032	-1.02218	0.708912	1.24077	0.0294487	1.56144	0.000940113
A_32_P144342	1.03567	0.708876	1.07421	0.493598	1.68259	0.00158667
A_23_P127948	-1.03908	0.708876	1.16222	0.0610408	1.87796	0.00261564
A_23_P402733	1.03134	0.708401	1.55922	0.00521383	1.42429	0.0112375
A_24_P198178	1.04748	0.707738	-1.10191	0.58911	1.68038	0.0143509
A_23_P379864	-1.07415	0.707051	-1.12675	0.679646	-1.69664	0.0702774
A_24_P935712	1.06515	0.707051	1.74999	0.0358898	1.21707	0.404121
A_24_P752362	-1.11322	0.706988	1.00806	0.987771	2.06912	0.0820381
A_23_P141142	-1.04542	0.705737	1.00142	0.994731	-1.76122	0.0058789
A_23_P114381	-1.10698	0.7056	1.05673	0.899285	2.13013	0.0558669
A_23_P101281	1.03939	0.70551	1.87747	0.00256894	1.40101	0.0233908
A_32_P37704	1.02547	0.70526	1.16217	0.0688746	1.50052	0.00112842
A_23_P250813	-1.0417	0.705178	1.25437	0.133392	-1.55175	0.0307553
A_23_P65983	-1.03548	0.704914	-1.11193	0.413748	-1.53614	0.0100714
A_23_P116376	1.08854	0.703969	1.46878	0.234559	1.80762	0.0860308
A_23_P151975	1.04342	0.703384	-1.13604	0.379557	-1.50766	0.019127
A_24_P279760	1.04051	0.702692	1.11299	0.474245	1.52516	0.0185477
A_23_P214803	1.0667	0.702645	1.16357	0.538826	2.4757	0.00515621
A_24_P261383	1.04817	0.702612	-1.2946	0.139668	-1.8056	0.00692919
A_24_P218509	1.06184	0.70193	-1.02065	0.937834	-2.18398	0.00564314
A_23_P162047	-1.06842	0.701874	-1.53555	0.0859796	1.17884	0.495814
A_23_P45361	-1.04287	0.701874	1.62035	0.0135929	1.77202	0.00596345
A_24_P245767	-1.03014	0.70178	1.01223	0.926773	-1.60497	0.00163816
A_32_P182186	-1.02939	0.701709	-1.24015	0.0347573	-1.77442	0.000484537
A_24_P171268	-1.0799	0.701327	1.11457	0.732855	2.10352	0.0272708
A_23_P4323	-1.06653	0.701327	-1.30064	0.256991	1.83127	0.0247971
A_24_P122524	-1.06925	0.700648	-1.11704	0.64494	1.8613	0.0211601
A_32_P325680	-1.04716	0.700061	1.17732	0.309886	-1.5971	0.0168809
A_32_P94722	1.10164	0.699864	2.59125	0.0247204	1.8429	0.108509
A_23_P95417	-1.03069	0.699763	-1.04521	0.659752	-1.60506	0.00160169
A_32_P87972	-1.07165	0.698269	1.26541	0.307362	2.55396	0.0042309
A_23_P111306	1.04274	0.698221	1.07353	0.669216	-1.78497	0.00480762
A_23_P153120	1.03916	0.696726	1.12101	0.443262	1.90144	0.00239946
A_23_P500271	-1.04206	0.696646	1.51338	0.0150327	1.06435	0.662823
A_23_P122067	1.10149	0.696645	-1.14399	0.724004	-2.73978	0.0173168
A_23_P203558	1.04737	0.696645	-1.17538	0.133284	-1.63321	0.013246
A_23_P412980	-1.04009	0.696645	-1.53201	0.0166879	-1.21532	0.149587
A_23_P75663	-1.06732	0.696573	-1.7099	0.0347861	-2.04389	0.0117384
A_32_P164246	1.0365	0.696572	1.61029	0.0076516	1.13396	0.327811
A_24_P925186	1.03724	0.69612	-1.14081	0.276719	1.78598	0.00171279
A_24_P119141	1.09043	0.695955	1.11272	0.764346	1.85023	0.0704965
A_23_P205686	-1.03023	0.695309	-1.37763	0.0322928	-2.71162	0.000224068
A_23_P163850	1.06335	0.693926	1.6336	0.234572	1.37605	0.0440934
A_23_P209200	-1.05888	0.69374	-1.54788	0.03351	-1.74369	0.0123477
A_23_P92928	-1.07453	0.693168	-1.55328	0.0974854	-1.25001	0.386381
A_32_P134056	1.04506	0.693168	1.45333	0.0415436	1.51861	0.0252574
A_24_P332541	1.02748	0.693015	-1.04541	0.622538	-1.63183	0.000883779
A_23_P113716	1.06186	0.692571	1.86476	0.00132464	-3.04098	0.000137387
A_32_P85880	1.03072	0.692464	1.00164	0.990454	1.85649	0.000710502
A_23_P87879	1.05073	0.691909	-1.23147	0.0543521	2.22982	0.00161483
A_23_P14255	-1.05763	0.691851	1.01709	0.949059	1.952	0.00787203
A_23_P115872	-1.06966	0.691851	-1.07635	0.791007	1.71421	0.0450913
A_32_P194264	1.09792	0.691851	-1.21201	0.597731	1.85933	0.0881221
A_23_P345118	1.06221	0.691851	1.17822	0.441163	-1.56667	0.0522489
A_23_P100196	-1.06724	0.691819	1.18809	0.463888	1.53747	0.0846544
A_32_P91773	1.05533	0.69132	1.00762	0.976083	1.8732	0.0087159
A_24_P263653	-1.07034	0.690564	-1.20528	0.431959	-1.59434	0.0698513
A_32_P106925	-1.02464	0.689622	1.01603	0.833373	-1.52427	0.000538727
A_23_P46894	1.04673	0.689387	1.29025	0.132374	1.75671	0.00781275
A_23_P162486	-1.07976	0.688469	1.36947	0.223687	-2.06332	0.0134749
A_23_P425324	1.07287	0.685879	-1.06389	0.826417	1.56084	0.0877489
A_23_P201538	-1.05326	0.684713	-1.46177	0.0257736	-2.36128	0.000813122
A_23_P11862	-1.07155	0.684031	1.04285	0.886701	1.62975	0.0624941
A_23_P94461	-1.0984	0.683655	1.01487	0.974217	-1.93165	0.0695895
A_23_P104853	1.07248	0.683466	-1.32571	0.237203	-1.77056	0.0309644
A_24_P367496	-1.02401	0.6824	1.07262	0.345756	-1.52079	0.000555461
A_23_P206441	-1.07302	0.682113	-1.16102	0.0457514	-1.61166	0.000326259
A_23_P24688	-1.04818	0.682103	1.04521	0.816402	-1.99962	0.00340877
A_32_P141664	1.03039	0.681771	2.14987	0.000695942	2.44721	8.06e-05
A_23_P30024	-1.06747	0.681353	-1.63492	0.00717345	-1.50794	0.00105159
A_23_P27346	1.01997	0.681223	1.79643	0.010767	-2.00396	0.001395
A_24_P309360	-1.11252	0.681023	1.90109	0.0584609	1.95433	0.0573265
A_23_P62255	-1.09568	0.680953	1.08179	0.820655	1.73207	0.0881221
A_32_P34881	-1.04063	0.680876	1.23582	0.055212	1.67533	0.00162446
A_23_P374226	1.0541	0.680827	1.02396	0.911938	1.50691	0.0336712
A_24_P93736	-1.09028	0.680827	1.09181	0.79756	2.17473	0.0260638
A_23_P129801	-1.02624	0.67998	1.1074	0.254732	1.78646	0.000454259
A_24_P273014	-1.04052	0.679625	-1.07178	0.588415	1.55661	0.00560032
A_23_P126120	-1.05179	0.679403	1.01095	0.961785	-1.62985	0.0169865
A_24_P201353	1.04041	0.67919	1.18494	0.226468	1.50192	0.0162911
A_32_P40375	-1.02462	0.679083	-1.40757	0.00211001	-2.28642	5.06766e-05
A_24_P354496	1.05405	0.678581	1.38627	0.0943332	1.62181	0.0249235
A_24_P289139	-1.10467	0.678347	-1.05232	0.89907	-2.09425	0.0455109
A_23_P83498	1.05617	0.678329	1.48091	0.023169	1.50022	0.0188745
A_23_P125788	1.05804	0.677941	1.52997	0.0440776	1.63331	0.0286518
A_23_P120863	1.0654	0.676631	1.09165	0.685755	1.64537	0.0214074
A_24_P746650	1.03928	0.676386	-1.11312	0.398874	1.68449	0.00392691
A_23_P17269	-1.09138	0.675995	-1.46452	0.023169	-1.86203	0.00307643
A_32_P218482	1.05464	0.675936	1.05683	0.779052	2.14957	0.00286404
A_23_P12911	1.0286	0.675936	1.06275	0.540559	-1.5332	0.00153131
A_23_P315964	-1.04823	0.675615	-1.02274	0.910885	1.69429	0.0107445
A_23_P212475	-1.06836	0.67542	2.23289	0.00811359	1.30582	0.24092
A_23_P60306	-1.06274	0.675244	2.12134	0.00303372	1.4184	0.00482696
A_32_P504673	-1.05286	0.675193	-1.18183	0.356542	1.86048	0.00746066
A_24_P942030	1.04009	0.675144	1.09512	0.513675	1.66682	0.00479045
A_24_P263036	1.03038	0.674703	-1.58148	0.00380102	-1.87149	0.000541141
A_24_P56837	1.08864	0.674061	1.66081	0.0953692	1.84301	0.0585475
A_23_P9255	1.05872	0.67205	1.42754	0.0654341	1.702	0.0173419
A_23_P73530	-1.09706	0.671744	-1.24577	0.49038	-2.259	0.0262166
A_23_P69089	1.08804	0.671744	-1.66659	0.0663666	-2.08654	0.020471
A_23_P427103	-1.0272	0.67116	1.0092	0.925505	1.86286	0.000196731
A_23_P53126	-1.07518	0.671075	-1.26612	0.0467546	-2.20946	0.000256825
A_23_P118815	-1.04032	0.670496	1.16287	0.279235	-2.90361	0.0224239
A_23_P333951	-1.08887	0.670297	-1.06492	0.850622	1.80619	0.0611566
A_24_P800363	1.07788	0.669732	-1.50794	0.091353	1.01609	0.95082
A_23_P114008	-1.02448	0.669732	-1.1684	0.0556794	-1.91121	0.000111754
A_24_P68214	-1.04247	0.669528	1.00171	0.992449	1.99761	0.00130533
A_23_P426292	1.08269	0.669497	-1.29918	0.0501329	1.61955	0.00387197
A_23_P324706	1.02951	0.669401	-1.13983	0.151855	1.81508	0.000354408
A_23_P48513	1.02658	0.668778	-1.39989	0.00447277	-1.61027	0.00335442
A_23_P214658	-1.0335	0.668501	-1.08901	0.396909	-1.72098	0.000835879
A_24_P923095	-1.06122	0.668339	-1.75647	0.0178653	-1.67078	0.0269719
A_24_P134195	1.09673	0.666918	-1.07771	0.835815	-1.70627	0.0993336
A_23_P53826	-1.10656	0.666875	1.33363	0.361002	2.64543	0.0117553
A_23_P310068	-1.10149	0.666856	1.21762	0.547383	1.7931	0.0848833
A_24_P99679	-1.06664	0.666472	-2.14638	0.00521383	-2.09857	0.00388963
A_23_P57248	1.03755	0.665472	-1.08934	0.486868	-1.55789	0.00491225
A_32_P187651	-1.1201	0.66453	1.28034	0.523596	1.96232	0.0949136
A_23_P86064	-1.04578	0.664013	-1.26207	0.101483	-1.94966	0.0018906
A_23_P36445	-1.09245	0.663563	-1.19506	0.550816	-2.01733	0.0308183
A_23_P399146	1.06022	0.663509	1.26048	0.242026	1.7786	0.0136292
A_23_P217498	-1.09926	0.663204	-1.68339	0.0863748	-2.83067	0.00759284
A_23_P308603	-1.13592	0.663168	1.14898	0.150791	-1.83435	0.000476366
A_24_P40907	1.06843	0.662987	-1.51892	0.0562584	1.20192	0.323042
A_24_P344537	1.08376	0.662512	-1.15786	0.602643	-1.86818	0.0387479
A_23_P201279	1.02512	0.662205	1.14544	0.0694295	-1.8921	8.05128e-05
A_23_P217564	1.0312	0.661506	1.30168	0.0168832	1.57375	0.00165768
A_23_P316215	1.0942	0.661204	2.19074	0.0252441	1.67253	0.0992139
A_23_P212126	-1.04771	0.660848	1.05342	0.751829	1.54203	0.0163603
A_32_P315178	-1.05117	0.660691	-1.17516	0.29554	1.66458	0.010682
A_23_P113351	1.09975	0.660428	1.25625	0.456109	2.0775	0.0354404
A_23_P218918	-1.03794	0.659318	-1.3052	0.031629	-2.61287	0.00156759
A_23_P434473	1.12733	0.658783	-2.1755	0.0527463	-2.57777	0.0290379
A_23_P104819	1.05881	0.658204	-1.09126	0.662764	2.02386	0.00511385
A_24_P913178	-1.13312	0.657741	-1.57159	0.247413	-2.07579	0.0764135
A_23_P25873	-1.06248	0.657689	-1.28834	0.00726117	-1.50109	0.000737064
A_23_P155162	1.02868	0.657535	1.26736	0.0303938	2.50869	8.02697e-05
A_23_P9056	1.02751	0.656988	1.2632	0.0116146	2.60358	5.06766e-05
A_24_P71439	1.06237	0.656352	1.08535	0.684704	1.50549	0.0469362
A_23_P305711	1.11123	0.656352	1.17301	0.659557	2.0131	0.0477957
A_23_P69491	-1.02541	0.656207	1.35901	0.070306	-1.51804	0.00299968
A_23_P68824	1.05305	0.65583	1.09175	0.611495	-1.53533	0.0233588
A_23_P2674	1.05807	0.655739	1.01396	0.94982	-1.54597	0.0277777
A_23_P204947	1.03821	0.654512	1.65055	0.00343627	-2.44352	0.00815106
A_24_P8075	1.06097	0.653645	-1.22029	0.307888	-1.74007	0.0161233
A_23_P137797	1.04965	0.653475	1.03374	0.856458	-1.77825	0.00593622
A_24_P574599	1.06194	0.653143	1.05191	0.824848	-1.70542	0.0223047
A_23_P74737	1.03125	0.653143	-1.29002	0.028665	-1.52165	0.00258838
A_23_P202540	-1.02977	0.653124	1.16026	0.0639627	1.66351	0.00293703
A_23_P135417	-1.07489	0.652553	-1.62937	0.0358923	-2.09094	0.00751715
A_32_P453191	1.02503	0.652287	-1.00055	0.996457	-1.99558	0.000110915
A_24_P264063	-1.02618	0.652287	1.55069	0.00126264	1.33463	0.00234916
A_23_P13899	-1.06446	0.651385	1.29507	0.231571	1.891	0.016168
A_23_P202558	-1.10647	0.65135	-1.14586	0.706008	1.74967	0.0979615
A_24_P355145	1.07232	0.651021	1.0716	0.783886	-1.55447	0.0605848
A_24_P155058	1.0302	0.650951	1.12205	0.220306	-1.55212	0.00190713
A_23_P252764	-1.03098	0.650951	-1.32814	0.0157321	1.54882	0.00175658
A_23_P101007	1.04741	0.650634	-1.09156	0.57181	1.75967	0.00484225
A_23_P113026	-1.06366	0.650629	-1.0784	0.686622	1.52377	0.0311337
A_24_P128140	-1.06808	0.650592	1.65695	0.030487	1.34266	0.160014
A_23_P83599	-1.05157	0.650572	1.05665	0.723982	-2.21022	0.000835588
A_24_P306094	1.0783	0.65003	-1.54325	0.0794654	-1.65728	0.0535182
A_23_P211584	1.03854	0.649811	1.24161	0.0868234	2.1303	0.000594311
A_32_P122614	-1.07708	0.649722	1.50888	0.0802251	1.55981	0.0600342
A_23_P55572	-1.07396	0.649646	-1.19356	0.437057	-1.88507	0.0199017
A_24_P161853	-1.05362	0.649593	-1.10358	0.586188	-1.63373	0.0159707
A_32_P47121	1.05997	0.649379	1.10171	0.598226	-1.82195	0.00801416
A_23_P124837	1.10082	0.648558	-1.25884	0.0202639	-3.81989	0.001421
A_23_P160481	-1.08149	0.647593	-1.31443	0.26348	-2.03834	0.0164351
A_32_P48066	-1.08112	0.647593	1.32944	0.221381	-3.94032	0.000704638
A_23_P68910	1.047	0.64703	1.01164	0.951296	-1.90234	0.00255429
A_23_P102364	-1.08423	0.647009	-1.06387	0.837367	-1.58984	0.0916952
A_23_P212579	1.0644	0.646567	1.01106	0.966762	1.53948	0.0446597
A_23_P58967	-1.05941	0.646225	-1.10071	0.588282	-1.88663	0.00588363
A_24_P398016	1.05493	0.645827	1.1711	0.365975	1.87097	0.00609779
A_32_P21916	-1.04002	0.64532	-1.55541	0.00813852	1.26516	0.0734984
A_24_P152566	-1.05608	0.64519	-1.0898	0.645054	-1.84797	0.00738673
A_32_P179239	-1.06393	0.644946	1.31585	0.163099	-1.58837	0.0387836
A_24_P753161	1.08347	0.64472	1.15852	0.57173	1.59026	0.0844765
A_23_P99996	1.07025	0.644454	-1.02581	0.926366	1.65046	0.0405429
A_24_P316489	-1.06015	0.644405	1.45472	0.0600461	1.77748	0.0115872
A_24_P924301	-1.04606	0.644179	1.583	0.0130105	-1.81175	0.00352908
A_32_P16747	-1.05838	0.643006	-2.40157	0.00143141	-2.61954	0.000515382
A_24_P110926	1.0631	0.642697	1.10063	0.642627	1.63242	0.0260531
A_24_P409346	1.02943	0.642191	1.29567	0.0175097	1.50339	0.00141055
A_23_P170088	1.05307	0.64202	-1.16987	0.31518	-1.62646	0.0127119
A_23_P422071	-1.03184	0.641844	-1.04157	0.666968	-2.03221	0.000189328
A_23_P333138	1.07419	0.64107	1.01938	0.946635	-1.70269	0.0328706
A_24_P331711	1.06301	0.640423	-1.26032	0.179194	-2.35318	0.00169398
A_23_P30175	1.06618	0.640178	1.26789	0.24119	1.66164	0.0296897
A_24_P128145	1.02805	0.639124	-1.00421	0.969878	1.67296	0.000606382
A_23_P218608	-1.08589	0.639123	-1.78218	0.0306432	-1.8825	0.00487727
A_24_P401842	1.06103	0.639011	1.08048	0.696387	1.88026	0.00758835
A_24_P359067	-1.05424	0.638535	1.08658	0.620982	1.66112	0.0103557
A_32_P361185	-1.06307	0.638227	1.0303	0.888087	-1.56799	0.0278205
A_23_P98183	-1.05808	0.637735	-1.09999	0.237937	2.16011	0.00166497
A_24_P409661	1.08346	0.637378	1.51732	0.0980795	1.43628	0.149459
A_24_P152649	-1.04311	0.63727	1.45601	0.0165159	1.81828	0.00191325
A_32_P191120	-1.08953	0.636655	-1.18895	0.504078	-2.03526	0.0169035
A_23_P5300	1.05428	0.636457	1.94875	0.000695942	1.95942	0.000126491
A_23_P131289	-1.04483	0.63627	-1.03858	0.819536	1.58564	0.00862772
A_32_P902988	1.08957	0.636233	1.12573	0.673139	2.49797	0.00789032
A_24_P12413	1.08351	0.635543	1.61757	0.0694295	1.15942	0.557181
A_23_P126735	1.02843	0.63553	1.63477	0.00223122	1.63241	0.0010312
A_24_P143032	1.04567	0.634679	1.09358	0.50622	1.59207	0.00716191
A_24_P39195	1.04135	0.634624	1.48053	0.0116947	2.07453	0.000674449
A_23_P134764	-1.04073	0.634624	-1.56869	0.00532564	-1.20694	0.116712
A_23_P136870	1.05819	0.634572	-1.2437	0.148453	-1.54391	0.015258
A_23_P15101	-1.06447	0.634254	1.18907	0.379557	-1.6311	0.0297762
A_32_P164573	1.04685	0.633356	-1.05626	0.714978	-1.65731	0.00542826
A_24_P319088	1.05402	0.633271	1.27582	0.125709	-1.50327	0.0203066
A_23_P399112	1.04454	0.633125	1.41418	0.0247204	1.51654	0.010128
A_23_P82738	1.06601	0.632688	-1.8151	0.042807	-3.10374	0.00347253
A_23_P51278	-1.03302	0.632639	-1.1532	0.102292	-1.88888	0.000270228
A_23_P337689	1.08298	0.631859	-1.29266	0.251039	1.55342	0.0724521
A_23_P38041	1.03657	0.63164	1.15513	0.193437	1.72682	0.00147855
A_23_P126735	-1.07292	0.63134	1.63477	0.00223122	1.63241	0.0010312
A_32_P139898	-1.06165	0.631127	-1.12721	0.510943	-1.70404	0.0131165
A_32_P115162	-1.09874	0.631059	-1.29711	0.375236	1.84292	0.0501133
A_23_P139166	-1.13467	0.631059	-1.44947	0.329473	-2.45594	0.0363204
A_24_P333420	1.06343	0.631041	1.93924	0.00875916	-1.05746	0.777223
A_24_P209571	1.05055	0.630092	-1.01681	0.926366	-1.86117	0.00296213
A_23_P19529	-1.04266	0.630061	-1.50165	0.0144389	-1.35629	0.0299253
A_24_P920484	-1.07077	0.62845	-1.17379	0.429814	-1.75176	0.01841
A_24_P192485	1.04554	0.628412	1.05051	0.728779	1.51945	0.0112072
A_24_P701776	-1.07083	0.628361	-1.14699	0.530665	1.52248	0.0647277
A_24_P251899	1.13555	0.627983	1.19103	0.677858	2.06478	0.0701919
A_24_P235870	-1.0943	0.627901	-2.21279	0.0187019	-1.08173	0.769635
A_23_P139509	1.03494	0.627265	1.31156	0.0214763	-2.38351	0.000131937
A_23_P117424	-1.07103	0.626841	-1.52346	0.0389948	-1.39588	0.0817307
A_32_P157504	1.05356	0.62646	1.96986	0.0030872	1.25092	0.140811
A_32_P171856	-1.06492	0.626251	1.1126	0.566616	-1.53344	0.0349517
A_32_P172755	1.04076	0.626251	1.32788	0.0397377	1.66716	0.00240338
A_32_P167883	-1.08632	0.625875	-1.00772	0.979068	-1.58307	0.0562592
A_23_P141394	1.07721	0.624536	1.50855	0.0638672	1.14488	0.525168
A_23_P127547	-1.03721	0.624255	-1.23765	0.0607621	-1.6304	0.00210158
A_24_P66605	1.0467	0.624249	1.15378	0.279235	1.50923	0.0087159
A_24_P42539	1.08848	0.623156	1.23002	0.402468	1.58247	0.0814207
A_23_P214354	1.07172	0.623156	-1.56083	0.0336352	1.0224	0.910895
A_23_P41948	1.03129	0.623156	1.52692	0.00207115	1.9268	0.000190173
A_24_P490704	-1.03624	0.623072	-1.47801	0.00296891	-2.68814	6.6024e-05
A_24_P7570	1.03725	0.621834	1.01766	0.898279	-1.60594	0.00217768
A_23_P307346	1.05012	0.62145	-1.22617	0.136973	-1.5265	0.00978345
A_23_P2683	-1.06861	0.621265	-1.64327	0.0544867	-1.62434	0.0606652
A_24_P266880	1.05115	0.621229	1.13593	0.139612	2.33038	5.31055e-05
A_32_P140823	1.03114	0.621078	1.38102	0.00349947	1.76716	0.000197475
A_32_P67209	1.03717	0.62059	-1.30608	0.0236115	-2.19034	0.000147239
A_23_P80032	1.08608	0.620485	1.27514	0.109571	2.20837	0.00948851
A_24_P185421	1.05604	0.620356	1.07748	0.64825	-1.50375	0.0179409
A_24_P19268	-1.04239	0.620266	1.45015	0.00830497	1.52132	0.0033089
A_23_P256716	-1.02982	0.620217	1.00738	0.922024	1.77603	0.000115453
A_23_P169756	-1.08971	0.620054	-1.58361	0.0623784	-1.7616	0.0344999
A_23_P254801	1.05138	0.620054	-1.17831	0.0367792	-1.90626	8.06e-05
A_23_P146050	1.06629	0.618931	1.82209	0.0134368	1.21687	0.307727
A_24_P870176	1.04512	0.618288	1.45206	0.016564	1.54335	0.00726407
A_23_P395438	1.06447	0.618105	-1.12748	0.490143	-1.67477	0.0146511
A_23_P415033	-1.06013	0.617114	-1.00043	0.998688	-1.5071	0.0363581
A_24_P942621	-1.04824	0.616695	-1.24487	0.0959464	-1.81754	0.00226101
A_32_P1701	-1.05661	0.615781	1.41758	0.0415748	1.96045	0.00282872
A_23_P126869	-1.07759	0.615681	-1.17577	0.424249	-1.7855	0.0179131
A_23_P21436	-1.11947	0.614717	-1.12017	0.765617	-2.26308	0.0321991
A_32_P98683	1.07144	0.614717	-1.15399	0.45656	-1.79491	0.0138328
A_24_P831309	1.05932	0.614717	-1.1629	0.378844	1.66484	0.0119849
A_23_P258698	-1.07303	0.61422	1.31152	0.197344	1.80608	0.0178797
A_24_P538618	1.06888	0.61291	-1.1227	0.55556	1.69223	0.0195444
A_23_P8763	1.03448	0.61256	-1.07683	0.483185	1.50454	0.00373162
A_23_P157416	1.12134	0.612452	1.35268	0.348706	1.91537	0.0664075
A_23_P89249	-1.1375	0.611876	-1.22468	0.0638672	1.76106	0.00613381
A_23_P502609	1.04096	0.611832	1.5735	0.00484872	1.76746	0.00118958
A_23_P209360	-1.04155	0.611332	1.54381	0.00281837	1.24295	0.037979
A_24_P95154	1.09839	0.610741	1.0196	0.956622	-1.67257	0.0780704
A_23_P77661	1.0552	0.610385	1.08981	0.58765	2.06716	0.00194358
A_24_P462939	1.06142	0.610241	1.05079	0.803644	2.26086	0.00189108
A_23_P206212	-1.0438	0.610194	-1.43029	0.00474423	1.71887	0.00453604
A_32_P154885	-1.06283	0.609967	1.54944	0.0295403	1.195	0.290884
A_23_P5171	1.10992	0.609622	1.20452	0.559602	1.914	0.0531429
A_24_P930799	-1.075	0.60952	-1.11493	0.617756	-1.50564	0.0639179
A_23_P49459	1.08015	0.60952	1.27339	0.267432	2.05043	0.010798
A_24_P108401	-1.03583	0.60952	1.29325	0.0259816	1.59682	0.00183564
A_24_P238896	-1.14393	0.609491	-1.50038	0.253156	-3.79197	0.00611032
A_24_P822869	-1.07765	0.609491	-1.51654	0.0721723	-1.34478	0.175636
A_32_P59990	1.06014	0.609091	-1.15102	0.394703	1.59527	0.0181752
A_24_P95059	1.05672	0.608946	-1.02439	0.899068	1.73778	0.00679421
A_23_P119478	-1.05408	0.608946	1.20814	0.186931	1.58738	0.0114836
A_23_P147431	1.10476	0.608724	-1.28643	0.330183	2.67363	0.00080709
A_24_P928637	1.07174	0.608137	1.24097	0.296684	1.88155	0.0118109
A_23_P209625	1.07686	0.608137	2.05098	0.00862398	1.52797	0.0576925
A_32_P29395	-1.05343	0.607396	-1.08829	0.564292	-1.93779	0.00139306
A_23_P133432	1.04033	0.60739	1.13134	0.259427	1.52576	0.00483785
A_23_P129678	-1.07559	0.606188	-1.15397	0.453858	1.88246	0.00976146
A_24_P350017	-1.0542	0.606129	-1.05536	0.738891	-1.66801	0.00655702
A_23_P55666	-1.02999	0.605902	-1.00761	0.922363	-1.90683	8.38749e-05
A_23_P169766	1.09528	0.605778	1.45974	0.122437	1.71808	0.0465525
A_24_P109854	1.05269	0.605698	1.01646	0.930736	1.56732	0.0135607
A_32_P163814	1.09241	0.605147	1.17128	0.517124	2.26463	0.00875787
A_23_P91350	-1.07392	0.604834	1.00404	0.987771	-1.68546	0.0243964
A_24_P331779	-1.04937	0.604834	1.05045	0.746921	1.5237	0.0116895
A_23_P259333	1.02845	0.604834	-1.0678	0.339725	-1.5276	0.000399368
A_23_P37327	-1.05648	0.604632	1.18225	0.192571	2.31071	0.000528234
A_23_P200443	-1.03509	0.603698	-1.42706	0.0105417	-1.67477	0.000771919
A_24_P563966	-1.05158	0.603366	-1.31419	0.038454	-1.53917	0.00681204
A_23_P147224	-1.05309	0.603131	1.54132	0.0106063	-1.05187	0.713135
A_23_P42724	-1.10592	0.60312	-1.00035	0.99926	-1.6973	0.0767456
A_23_P125639	-1.14126	0.60294	-1.00404	0.993928	-2.21356	0.0536745
A_23_P335486	1.05282	0.60294	1.55189	0.0143658	1.60841	0.0106234
A_24_P914922	1.03198	0.60294	-1.29077	0.0105859	-1.54614	0.000801
A_32_P142635	-1.05349	0.602693	-1.51213	0.0130105	1.17804	0.185632
A_23_P120588	-1.05332	0.602522	1.24142	0.133284	1.62209	0.00780634
A_23_P78762	-1.10099	0.601201	1.1289	0.675772	-1.77544	0.0549148
A_23_P110135	1.09788	0.600452	1.03357	0.920761	2.00252	0.0248725
A_23_P53126	1.03898	0.600181	-1.26612	0.0467546	-2.20946	0.000256825
A_23_P426153	1.06334	0.600155	1.27295	0.163594	1.86159	0.0069522
A_23_P58529	-1.0486	0.599833	-1.06703	0.623384	-1.63699	0.00325785
A_32_P216734	-1.0493	0.599418	1.33673	0.0358601	1.73021	0.00283508
A_32_P26621	1.07848	0.599027	1.06153	0.806929	1.51986	0.0632518
A_23_P143817	1.05896	0.598794	1.11941	0.491504	1.74469	0.00769283
A_23_P127721	1.08599	0.598794	-1.50585	0.0635571	-1.37416	0.137693
A_32_P132169	-1.08595	0.598524	1.61283	0.0418493	1.55547	0.0494527
A_23_P167276	1.03024	0.598388	1.3453	0.00656769	2.26718	7.76388e-05
A_23_P94875	1.10175	0.596345	1.08718	0.779052	1.74676	0.0500261
A_23_P111480	1.08732	0.595923	1.39098	0.171678	3.24883	0.00153131
A_23_P153853	-1.08834	0.595805	1.17339	0.482686	-1.75706	0.0257919
A_23_P90980	-1.07506	0.595597	-1.57002	0.0276995	-1.44595	0.0543522
A_23_P163850	-1.09321	0.595497	1.6336	0.234572	1.37605	0.0440934
A_23_P52569	1.06692	0.594595	1.51489	0.0385392	1.45941	0.0547026
A_24_P693986	-1.06518	0.594085	-1.03178	0.866455	-2.3901	0.000942037
A_24_P248053	-1.06007	0.593975	1.31724	0.0585627	2.1784	0.000916924
A_23_P217049	-1.08583	0.593702	-1.43789	0.101658	-2.15082	0.00678227
A_24_P330303	1.08404	0.593182	-1.47848	0.0518536	-2.02062	0.00569846
A_24_P601576	1.03786	0.592824	1.29883	0.00805212	1.94041	0.000145499
A_23_P13907	1.04194	0.59132	-1.47493	0.00533112	-1.76563	0.00058962
A_23_P87879	-1.10912	0.591283	-1.23147	0.0543521	2.22982	0.00161483
A_24_P945188	1.04699	0.590894	1.5647	0.00849514	1.27371	0.0727746
A_32_P501260	1.04473	0.589565	1.19447	0.0677084	2.27797	0.000147239
A_24_P912941	1.07223	0.589395	-1.00714	0.977281	-1.55844	0.0324347
A_23_P32404	-1.09177	0.58806	-1.18656	0.469868	-1.5771	0.0737731
A_23_P428248	-1.09245	0.587814	-1.19617	0.484444	-2.17678	0.00977179
A_23_P203841	-1.12761	0.585768	-1.26348	0.471256	-2.23653	0.0302409
A_23_P501790	1.09015	0.585768	1.22596	0.38167	1.61294	0.0604737
A_23_P26847	-1.08525	0.584842	-1.16505	0.499806	-1.88792	0.0165835
A_24_P383940	-1.09688	0.584622	-1.15097	0.556869	-1.50511	0.0857382
A_24_P415624	-1.04872	0.583956	1.35508	0.0312267	-3.11009	0.000115873
A_23_P306500	-1.05173	0.583845	1.45381	0.0161068	1.69671	0.00366478
A_24_P92744	1.05946	0.583828	1.24104	0.161381	1.53432	0.0164871
A_23_P165962	1.06675	0.583557	1.53698	0.0254945	1.19857	0.27533
A_23_P47777	-1.06512	0.582796	1.16642	0.380055	1.58966	0.0223087
A_32_P314783	1.12367	0.582748	1.1607	0.64676	1.81377	0.0553334
A_24_P794833	-1.07574	0.582255	1.35823	0.121032	-1.58255	0.0387638
A_24_P161655	1.05209	0.581108	-1.06307	0.663289	1.50989	0.012442
A_23_P55076	-1.05265	0.581108	-1.17326	0.22877	-1.61238	0.00700832
A_32_P230868	1.08507	0.581024	-1.03016	0.912818	2.03333	0.0109235
A_23_P58912	1.0571	0.580261	1.01276	0.950497	1.59747	0.0102286
A_32_P204950	1.10944	0.580261	1.06825	0.826841	2.41904	0.00894827
A_24_P556503	-1.04623	0.580261	-1.21071	0.0942645	-1.93929	0.000656986
A_24_P76898	-1.03527	0.580261	1.25181	0.0191246	-1.87447	0.000197803
A_23_P333852	1.09522	0.579902	1.71787	0.037666	2.21412	0.0083495
A_23_P74081	-1.0773	0.579902	1.57703	0.0069368	-1.64889	0.000412445
A_32_P156373	-1.04353	0.578941	1.47276	0.00618613	1.53315	0.00354411
A_23_P140362	-1.08828	0.578737	1.08568	0.743251	-1.5477	0.0737329
A_23_P144476	1.08276	0.577864	-1.12217	0.608332	1.50082	0.0768474
A_24_P99679	-1.04727	0.577728	-2.14638	0.00521383	-2.09857	0.00388963
A_32_P135972	1.07286	0.577583	-1.27114	0.176749	-1.51336	0.0396655
A_23_P630	1.17894	0.577575	-1.03913	0.945696	-2.60732	0.0475629
A_32_P81657	1.05788	0.577462	1.02126	0.911447	-1.6291	0.00891018
A_23_P102242	1.09064	0.576896	1.51058	0.0860644	2.57278	0.00386669
A_23_P150147	-1.03155	0.576896	2.07385	0.000404172	1.49414	0.000447202
A_23_P312358	-1.0375	0.576789	1.00509	0.96979	-1.75796	0.000778362
A_23_P26836	1.07006	0.576789	-1.05822	0.783494	1.60376	0.0234074
A_23_P69491	-1.11601	0.576789	1.35901	0.070306	-1.51804	0.00299968
A_23_P15511	-1.07583	0.576063	-1.04305	0.849625	-1.70204	0.0157424
A_24_P392351	-1.03694	0.575558	-1.14608	0.0859761	-1.72931	0.000361072
A_24_P692566	1.07683	0.57487	1.32254	0.160788	1.80872	0.0116095
A_32_P195788	-1.05165	0.574795	1.01119	0.948902	-1.51442	0.0129448
A_32_P151782	1.06868	0.574607	1.04795	0.82223	1.84908	0.00781327
A_23_P118815	-1.04814	0.573757	1.16287	0.279235	-2.90361	0.0224239
A_24_P361158	1.05776	0.573757	1.35256	0.0537127	1.77832	0.00343338
A_24_P282210	1.11269	0.57353	-1.14387	0.651882	-1.81956	0.0543132
A_23_P169137	1.06356	0.572849	-1.15173	0.386386	1.63726	0.0139983
A_24_P74828	1.03829	0.572618	1.04394	0.470833	-1.57479	0.000268008
A_32_P126362	-1.06154	0.571824	1.02652	0.890099	-1.83275	0.00474342
A_24_P123833	1.06552	0.57091	1.17859	0.306071	1.53942	0.0243024
A_23_P12884	1.06946	0.570891	1.06302	0.752907	2.09364	0.00333069
A_23_P72252	-1.05136	0.570859	1.3095	0.0471099	2.23296	0.000498542
A_32_P6062	1.04843	0.57015	-1.10003	0.401397	1.62086	0.00336013
A_23_P140792	1.07281	0.569255	-1.05757	0.763353	-1.99414	0.00329659
A_23_P253524	-1.02964	0.568419	-1.60888	0.00193697	-1.40776	0.00347433
A_24_P103893	1.04782	0.567823	1.12072	0.340225	1.51715	0.00668925
A_23_P11372	1.07131	0.567823	1.48409	0.00357753	1.63332	0.000711371
A_24_P293358	1.06481	0.566415	1.03048	0.858186	-2.39501	0.000620713
A_32_P189952	1.11975	0.5664	1.15143	0.655546	1.76008	0.0752902
A_24_P918694	1.07452	0.56629	1.50212	0.0397926	1.54738	0.0298544
A_23_P51580	-1.10969	0.566164	-1.04348	0.893167	-2.10561	0.0176633
A_24_P303199	-1.09429	0.566056	-1.155	0.506073	-1.54378	0.0634848
A_32_P157415	1.06118	0.564818	1.02827	0.873327	-1.90681	0.00270829
A_32_P10116	1.0421	0.564554	1.01193	0.928676	1.72411	0.000969165
A_23_P393531	1.04189	0.564554	1.67906	0.00246911	2.5392	0.000114723
A_32_P86173	-1.03695	0.563947	-1.13868	0.134482	-1.59021	0.000918516
A_24_P150194	1.06899	0.563815	1.09132	0.578304	-2.29481	0.000954113
A_24_P585676	1.08138	0.563597	-1.58627	0.028668	-1.29469	0.149483
A_24_P39919	-1.05922	0.563293	-1.84149	0.00290497	-1.22091	0.129173
A_23_P407203	-1.05986	0.563288	1.14201	0.35129	-2.13375	0.00114182
A_23_P51419	-1.12061	0.563115	-1.03724	0.915251	-1.59912	0.0983359
A_23_P217228	1.06369	0.563087	1.38617	0.0524369	1.64255	0.0108988
A_23_P96872	-1.06147	0.562942	1.06335	0.709472	-2.21345	0.000954006
A_24_P914797	1.03526	0.562894	1.08059	0.321988	-1.55829	0.000601267
A_23_P104318	1.04103	0.562064	1.59541	0.00242262	-1.04886	0.579234
A_23_P213706	-1.06633	0.561922	1.35794	0.0103107	-1.75898	0.00926459
A_23_P213255	1.08995	0.561816	1.1774	0.416791	2.22792	0.00443057
A_23_P164650	-1.08242	0.561816	-1.28961	0.0425487	1.74626	0.000326259
A_23_P105705	1.05685	0.561714	-1.03315	0.838448	2.23803	0.000799701
A_23_P159741	-1.05937	0.561662	-1.20773	0.181829	1.76382	0.00283096
A_23_P99559	-1.06965	0.561605	1.06419	0.732875	-2.47756	0.000897639
A_32_P41858	1.10201	0.561321	-1.55346	0.067582	-2.36686	0.00586386
A_23_P86021	-1.06785	0.561115	-1.25883	0.165905	-1.96214	0.00406543
A_23_P22854	-1.05292	0.561101	1.73137	0.00354918	1.88275	0.00153626
A_23_P112512	-1.0906	0.559876	1.05193	0.834088	-1.74553	0.0226821
A_23_P165090	1.07509	0.559647	-1.43226	0.040095	-1.8056	0.00520825
A_23_P57036	-1.19049	0.559462	-1.24762	0.0154363	-1.57981	0.00067013
A_32_P199551	1.0863	0.558863	1.17964	0.421543	1.92203	0.0109423
A_24_P148762	1.06616	0.558773	1.15619	0.381164	1.51682	0.0214096
A_32_P850175	1.07766	0.558438	1.2047	0.311746	1.57599	0.0249235
A_24_P940921	1.0463	0.558053	1.09966	0.381677	1.68934	0.0011672
A_24_P416301	1.1001	0.556519	1.32045	0.226325	1.66854	0.0480032
A_23_P136909	1.06311	0.556018	-1.27556	0.435407	-1.52846	0.00868592
A_23_P374281	-1.08389	0.555703	1.6283	0.0227912	1.82992	0.00873013
A_32_P101073	-1.15538	0.554293	-1.17911	0.669568	-1.99624	0.0714182
A_32_P497742	-1.06377	0.554077	1.5307	0.0097319	4.04049	7.64922e-05
A_23_P202427	-1.07823	0.553893	1.06413	0.75234	1.67112	0.0158369
A_24_P102636	-1.05569	0.553646	1.01759	0.911938	-1.5231	0.00992587
A_23_P37137	-1.09758	0.553646	-1.63622	0.0391082	-2.2268	0.00488968
A_23_P19556	1.07097	0.553646	1.52477	0.0275912	1.5103	0.0284796
A_23_P79518	1.0731	0.553566	-1.15797	0.1135	-1.65703	0.0139983
A_23_P211080	-1.06495	0.55196	-1.19972	0.193276	-1.9728	0.00159043
A_24_P5750	-1.14171	0.551922	-1.30258	0.417355	1.7998	0.0844135
A_23_P203391	-1.10226	0.551546	-1.01559	0.962494	-1.89423	0.0245712
A_23_P9075	-1.09735	0.551546	-1.05589	0.818668	-1.99511	0.00854423
A_24_P168456	-1.06599	0.551134	1.95652	0.00349947	1.56803	0.0142015
A_23_P57306	-1.0514	0.55105	1.5388	0.0166826	1.30397	0.0817116
A_23_P327551	1.07552	0.550744	1.65059	0.0126789	1.35469	0.0795307
A_24_P572303	1.04612	0.550675	1.63067	0.00406145	-1.08023	0.46219
A_23_P138157	-1.10367	0.550414	1.00729	0.980243	-1.55122	0.0638079
A_23_P86660	-1.07997	0.550124	-1.11734	0.578193	-1.6656	0.0238545
A_24_P655849	1.0462	0.548984	-1.06768	0.562149	-1.85342	0.000933907
A_23_P386561	-1.06942	0.548058	-1.05285	0.774238	-1.52024	0.0227687
A_23_P100220	1.05202	0.548058	1.6465	0.0051208	2.07405	0.000713054
A_32_P61061	-1.03216	0.548058	-2.22147	0.00030273	1.27422	0.00408067
A_23_P149858	1.11135	0.547371	1.18878	0.522335	1.70039	0.0634365
A_32_P194874	-1.08589	0.54646	1.10937	0.617132	-1.70316	0.0205273
A_23_P422204	1.03983	0.54621	1.77745	0.000872203	1.31773	0.00782359
A_23_P99452	1.03697	0.545693	1.38195	0.00805212	1.79184	0.000397111
A_23_P391264	1.06571	0.545671	-1.61765	0.0116511	-1.22346	0.15533
A_23_P411296	-1.07636	0.545578	1.08191	0.323129	2.17309	0.00101302
A_23_P108415	1.09342	0.544864	1.4709	0.0553165	-1.67212	0.0217618
A_32_P157471	1.04431	0.544864	1.63566	0.00277576	1.04962	0.625522
A_32_P100439	-1.10175	0.544428	-1.51262	0.0862366	1.08998	0.712755
A_23_P7194	-1.08979	0.544201	-1.09379	0.69451	-1.74302	0.0224685
A_32_P76865	1.15936	0.543688	-1.79842	0.0980065	-1.28798	0.45073
A_32_P145276	-1.0677	0.543637	-1.24065	0.186085	-1.63184	0.0114365
A_23_P9255	-1.06385	0.543523	1.42754	0.0654341	1.702	0.0173419
A_23_P97584	-1.13642	0.543366	1.18056	0.0268205	-2.27038	0.0259656
A_23_P98183	-1.11066	0.543085	-1.09999	0.237937	2.16011	0.00166497
A_24_P346101	1.0658	0.542617	-1.13217	0.402924	-1.51196	0.0203716
A_23_P211680	1.04096	0.542496	-1.10728	0.176528	1.73392	0.000321831
A_24_P918175	1.0786	0.542496	1.57026	0.0244514	1.32818	0.101869
A_24_P792389	1.09661	0.542277	-2.08407	0.00506821	-2.96614	0.00076877
A_23_P341275	1.03659	0.541355	1.66088	0.000872203	1.3311	0.00536136
A_32_P171921	-1.09967	0.540971	1.32445	0.171938	2.22966	0.0048956
A_23_P124946	1.0629	0.54081	-1.06362	0.695654	1.61027	0.00864074
A_24_P289188	1.04513	0.53923	-1.17216	0.136973	1.66782	0.00138023
A_24_P153542	-1.09331	0.538686	-1.2438	0.297026	-1.54072	0.0596949
A_24_P76635	-1.04596	0.538447	-1.12851	0.264131	-1.61498	0.00293928
A_23_P99027	-1.11911	0.537624	1.32498	0.270017	1.50588	0.00134901
A_23_P147404	1.07494	0.537609	-1.24076	0.197344	1.65814	0.0147507
A_23_P135190	1.06058	0.537483	1.02613	0.879975	-1.57467	0.00815666
A_24_P102650	-1.08584	0.537443	-1.10428	0.607702	1.58105	0.0312145
A_23_P303286	-1.08501	0.537048	-1.14593	0.455913	-2.03559	0.00469505
A_32_P503113	1.07452	0.536457	1.04742	0.817408	1.91079	0.00556041
A_23_P29939	1.05396	0.536359	1.24935	0.048282	1.50417	0.000614107
A_23_P208469	-1.09013	0.536324	-1.03442	0.885382	-1.84754	0.0117775
A_24_P50759	1.07873	0.536324	1.50576	0.00197762	1.74455	0.000302407
A_23_P167194	1.08597	0.535318	-1.22122	0.270009	1.60349	0.0251185
A_23_P114048	-1.07848	0.535215	-1.20898	0.263256	-1.91476	0.00563228
A_32_P169383	-1.06614	0.53479	-1.112	0.460437	-1.94683	0.00223877
A_24_P79529	1.05903	0.53479	1.673	0.00554343	-1.19519	0.173878
A_23_P383688	1.07738	0.534541	1.20989	0.33725	1.60361	0.0246281
A_23_P361381	-1.13898	0.53397	-1.196	0.556267	-1.70524	0.0904909
A_32_P142836	1.05867	0.533346	1.05441	0.708283	-1.81659	0.00143482
A_24_P935829	-1.07588	0.533008	1.24151	0.189761	1.8015	0.00737756
A_23_P74081	-1.04074	0.53261	1.57703	0.0069368	-1.64889	0.000412445
A_32_P96748	1.17108	0.532371	-1.58389	0.183621	-2.26648	0.0386322
A_24_P463517	1.10557	0.532149	-1.13313	0.601556	-1.73885	0.034383
A_24_P266309	1.13966	0.532021	1.82179	0.0654139	1.23747	0.495738
A_23_P77847	1.09663	0.531102	-1.13065	0.337511	1.65025	0.0313582
A_23_P168167	-1.0975	0.530926	-1.09262	0.70684	-1.6377	0.0432948
A_24_P945000	-1.10345	0.530399	-1.36838	0.147254	-1.56025	0.0605599
A_24_P166407	-1.15092	0.52997	-2.09091	0.0307248	-1.77629	0.0768564
A_24_P418044	-1.05175	0.52985	1.51959	0.00240165	2.70041	5.31055e-05
A_24_P773958	1.04152	0.529499	-1.16311	0.121032	1.58506	0.00175864
A_24_P75190	-1.09471	0.529281	1.24907	0.249851	1.61881	0.0327974
A_23_P362770	1.15622	0.5286	1.43595	0.293384	2.3	0.0354629
A_32_P233799	-1.06912	0.528389	-1.25308	0.130127	-1.52915	0.013391
A_23_P430792	-1.0622	0.527017	-1.38131	0.0249469	-2.06787	0.000742819
A_23_P65890	-1.05248	0.526777	1.23858	0.0836353	1.74921	0.00171279
A_32_P156017	1.04577	0.525919	1.05037	0.644303	1.53769	0.00200895
A_23_P64825	1.08915	0.525874	1.1685	0.438561	-1.62878	0.0322051
A_23_P88731	-1.10612	0.524811	1.19095	0.426923	1.59606	0.0530907
A_24_P384200	1.04496	0.523989	1.29262	0.0252592	1.53579	0.00278623
A_32_P305020	-1.07534	0.522948	-1.66867	0.016678	-1.38525	0.0691176
A_23_P202199	1.06268	0.522332	1.68772	0.00415343	1.07383	0.570845
A_23_P121265	-1.13587	0.521551	-1.48498	0.166838	-1.97004	0.0336421
A_23_P392928	1.0889	0.521529	1.54012	0.0430545	1.34633	0.127195
A_23_P162486	1.11422	0.521498	1.36947	0.223687	-2.06332	0.0134749
A_32_P205100	1.14142	0.52128	1.15034	0.650986	2.38549	0.0153498
A_23_P401084	-1.03944	0.52128	-1.05436	0.564292	1.54862	0.00144816
A_24_P358875	1.10607	0.521265	-1.03025	0.918877	1.5234	0.084221
A_24_P247820	-1.089	0.520902	1.7439	0.0192802	1.61084	0.034271
A_32_P27991	1.05966	0.520701	1.14879	0.281432	1.98644	0.00121889
A_23_P63711	-1.11637	0.518931	1.21769	0.452722	1.58926	0.0911965
A_32_P155460	-1.10056	0.518781	-1.11705	0.615785	-1.57483	0.04551
A_24_P934345	-1.07985	0.518266	-1.15103	0.355012	-2.4759	0.000737989
A_23_P83493	1.06468	0.517206	-1.07481	0.592442	-1.95166	0.00135855
A_23_P68846	1.10085	0.516822	1.68979	0.0338567	1.78252	0.0224654
A_23_P92948	1.04014	0.516559	-1.0371	0.682277	1.94622	0.000162367
A_23_P169470	1.11536	0.516462	1.29038	0.0607833	1.84236	0.031047
A_23_P89155	-1.09312	0.51566	-1.03935	0.873327	1.93663	0.00990503
A_23_P59210	-1.22121	0.515497	1.55393	0.00459359	1.852	0.000730144
A_23_P28084	1.07104	0.515223	1.23006	0.190567	1.52739	0.0198857
A_32_P104063	-1.07275	0.515209	-1.01639	0.920491	1.51143	0.0118911
A_23_P6381	-1.10066	0.515209	1.33998	0.162543	2.29904	0.0032877
A_32_P8361	1.05991	0.515163	1.52875	0.0106063	1.30703	0.0602387
A_23_P94128	-1.0993	0.514896	-1.81738	0.0157512	-1.82888	0.0135128
A_32_P9924	1.07474	0.514761	1.25702	0.14636	1.53296	0.0220121
A_24_P362850	-1.06748	0.514568	1.01242	0.939229	-1.54242	0.00693353
A_32_P204740	-1.11521	0.514389	1.60949	0.0636696	1.96622	0.0204236
A_23_P213255	-1.09246	0.514274	1.1774	0.416791	2.22792	0.00443057
A_23_P501183	1.1141	0.51368	1.00467	0.988484	1.63234	0.0641808
A_23_P30122	-1.09894	0.513186	-2.23216	0.00383778	-2.16568	5.31055e-05
A_32_P224638	-1.04702	0.512943	1.03697	0.724228	1.59757	0.00122268
A_24_P592591	1.04369	0.512693	1.62314	0.0022041	-1.4957	0.00268314
A_23_P114662	1.08904	0.512516	-1.18775	0.363244	1.51254	0.0469438
A_32_P28712	-1.0541	0.512249	1.30238	0.0451576	2.03567	0.000612955
A_24_P854896	1.06906	0.511763	1.46844	0.0265605	1.51555	0.018838
A_24_P490911	1.09983	0.510995	1.56754	0.0527656	1.32411	0.189933
A_23_P108501	-1.14529	0.510829	-1.33407	0.334682	-2.98222	0.00680891
A_23_P215720	1.10712	0.509682	1.16408	0.193275	1.59012	0.000526681
A_23_P16409	1.12001	0.50863	1.63495	0.0683256	1.35392	0.230213
A_24_P103434	1.03858	0.50863	1.69664	0.000831643	1.38605	0.00261442
A_23_P315421	1.04631	0.508503	1.16574	0.13163	1.70113	0.00118342
A_23_P124003	1.06381	0.508384	1.12758	0.293262	-1.59762	0.00354915
A_24_P179407	1.07991	0.508075	-1.32771	0.123052	1.69713	0.0143071
A_24_P668333	1.08538	0.507544	1.52404	0.0368663	-1.31975	0.129824
A_23_P165521	-1.09735	0.507075	-1.20501	0.32034	-1.76889	0.0147571
A_23_P250800	1.07667	0.50667	1.40061	0.047986	1.59365	0.0144994
A_23_P129322	-1.06092	0.505893	-1.06842	0.590225	-1.59205	0.00455449
A_24_P40165	-1.10585	0.505248	-1.43876	0.0967068	-1.53498	0.0643218
A_24_P919995	-1.03881	0.503822	1.28691	0.00937886	-1.66735	0.000254913
A_23_P158041	1.101	0.503811	-1.19211	0.416791	1.72955	0.0279333
A_24_P228637	-1.06434	0.503714	1.60587	0.0103533	-1.04729	0.750512
A_23_P209152	-1.14151	0.503562	-1.20559	0.533129	-2.16123	0.023685
A_24_P290764	1.0955	0.503284	1.30726	0.179478	1.73716	0.0209897
A_24_P256626	1.07577	0.50294	-1.02568	0.891193	1.84141	0.00440633
A_32_P3572	-1.10719	0.50294	1.19258	0.4237	1.76867	0.0265883
A_32_P55799	-1.19148	0.500745	1.02423	0.962543	-2.2192	0.0610624
A_23_P81522	1.04456	0.499439	1.26672	0.00506821	1.75343	0.000118068
A_32_P108917	1.08846	0.499378	-1.84163	0.0140738	1.15967	0.404962
A_24_P184305	1.04057	0.498969	2.73872	0.00030273	1.40505	0.00455719
A_23_P400078	-1.09683	0.498518	1.19346	0.0229412	-2.07642	7.64922e-05
A_24_P600622	1.18755	0.498009	-1.3326	0.451667	-2.13405	0.0675625
A_23_P428326	-1.17773	0.497984	1.0141	0.977687	-1.88011	0.0967919
A_32_P209909	-1.05773	0.497875	-1.33053	0.0242225	-1.56976	0.00265539
A_23_P145024	-1.04108	0.497664	1.32641	0.0071206	-2.18155	0.00108015
A_32_P205792	1.03322	0.496894	1.08043	0.273511	1.54047	0.000515921
A_23_P216622	1.06518	0.496894	1.19135	0.15182	-1.51373	0.00775268
A_23_P205875	1.10588	0.496065	1.32217	0.197498	1.95116	0.0137924
A_23_P163850	1.21075	0.49594	1.6336	0.234572	1.37605	0.0440934
A_32_P121978	1.07903	0.495356	1.11473	0.514316	1.58147	0.0181254
A_24_P333445	-1.10849	0.49511	1.09129	0.727103	-3.54402	0.0007908
A_32_P80089	1.09924	0.494881	-1.52699	0.0696017	1.28986	0.205655
A_23_P200843	1.11081	0.49485	-1.04709	0.867094	1.51589	0.0900689
A_23_P89249	-1.05129	0.49485	-1.22468	0.0638672	1.76106	0.00613381
A_23_P16523	1.09069	0.494724	1.17438	0.370825	2.0475	0.00262231
A_23_P309224	-1.06274	0.494447	1.10314	0.415664	-1.81165	0.00127856
A_23_P79518	-1.03831	0.494122	-1.15797	0.1135	-1.65703	0.0139983
A_23_P203558	1.06766	0.49402	-1.17538	0.133284	-1.63321	0.013246
A_24_P95029	1.21611	0.492123	-1.84404	0.14728	-2.0791	0.0986441
A_23_P6535	1.0658	0.491744	1.04491	0.74343	-2.36019	0.000314633
A_24_P169503	-1.16989	0.49156	1.01716	0.972361	-1.87435	0.0857613
A_24_P940831	-1.14951	0.491533	-1.27243	0.433092	-1.85805	0.0600907
A_24_P457304	1.06146	0.491475	1.65821	0.0053564	-1.16946	0.215566
A_24_P237175	1.06783	0.491362	1.43762	0.021991	2.4027	0.000444269
A_23_P74252	1.06206	0.49072	-1.08964	0.50351	-1.50113	0.00954805
A_23_P377909	-1.04641	0.490637	1.40319	0.00592114	-2.61524	7.64922e-05
A_24_P183334	-1.06775	0.490107	-1.00769	0.967732	-1.79175	0.00375703
A_23_P346086	1.06634	0.489902	1.17126	0.257638	1.78061	0.00347253
A_23_P95594	1.04824	0.489582	1.52288	0.00304203	1.58726	0.000954113
A_23_P23765	1.10097	0.489411	1.32212	0.00498473	-1.84185	0.00934832
A_32_P60065	-1.06701	0.489311	1.04171	0.791357	1.54107	0.0105002
A_23_P207999	1.1024	0.488476	-1.39879	0.0357601	-3.96125	0.00283508
A_32_P44775	-1.08862	0.487729	-1.13698	0.48106	-1.70537	0.0158158
A_23_P308763	1.04465	0.487729	1.53558	0.000872203	1.08907	0.190269
A_23_P83159	1.11041	0.487532	1.80908	0.0243892	1.48198	0.0930379
A_23_P144357	1.11437	0.487111	1.76388	0.0362731	2.24897	0.00826184
A_32_P751535	-1.08906	0.486164	-1.60485	0.0266614	1.09188	0.628381
A_23_P127948	1.09344	0.485626	1.16222	0.0610408	1.87796	0.00261564
A_23_P55099	1.08572	0.485087	1.29849	0.00447277	-2.12065	8.70116e-05
A_23_P26810	-1.06795	0.484343	-1.17842	0.0774705	-2.45799	0.000844548
A_24_P58740	-1.11667	0.484155	-1.20322	0.431203	1.61825	0.061763
A_23_P101141	-1.13563	0.48305	-1.12858	0.682996	-1.72274	0.0677721
A_23_P129279	-1.10543	0.482878	-1.44672	0.0687259	-1.67685	0.0238545
A_32_P599	-1.07966	0.482878	1.43843	0.0490155	1.6231	0.0152203
A_32_P155043	1.04461	0.482732	1.72505	0.000890456	1.78946	0.000308448
A_23_P386384	1.0803	0.482621	1.04363	0.80898	-1.69602	0.00853817
A_24_P299685	-1.06417	0.482448	1.11341	0.403416	2.17775	0.000711085
A_32_P99275	-1.09127	0.481946	-1.73864	0.0174035	-1.10546	0.594312
A_32_P35603	-1.05248	0.481449	-1.05302	0.549958	-1.5192	0.00163816
A_23_P133284	-1.09648	0.481439	1.46698	0.00650073	-1.50415	0.0585687
A_24_P316430	-1.15517	0.480953	-1.45229	0.219629	-1.85678	0.0639281
A_32_P114726	-1.12907	0.48005	-1.1232	0.652744	-1.93708	0.0214066
A_24_P417664	-1.09997	0.479923	-1.13255	0.522907	-1.73761	0.017216
A_24_P926044	1.04277	0.479838	1.29258	0.0111425	1.60468	0.000399368
A_23_P207400	-1.08892	0.479011	-1.9609	0.0584614	-2.57221	0.0192656
A_23_P502783	-1.09044	0.478692	1.23099	0.232467	1.76894	0.0109318
A_24_P857669	-1.06651	0.478628	-1.26943	0.0612681	-1.64981	0.00267976
A_23_P89249	1.09625	0.478252	-1.22468	0.0638672	1.76106	0.00613381
A_23_P216739	1.12662	0.478018	1.18885	0.493018	1.6119	0.0768737
A_23_P110253	-1.17081	0.478018	1.57067	0.00271039	1.65653	0.00091869
A_23_P119627	1.06477	0.477694	-1.21652	0.0831206	-1.74216	0.00151829
A_23_P148175	-1.17312	0.47708	-1.08966	0.826841	-1.93506	0.0690858
A_23_P80032	1.07421	0.476643	1.27514	0.109571	2.20837	0.00948851
A_23_P109436	1.07607	0.476643	1.45289	0.0315265	1.51784	0.0225164
A_24_P99152	-1.0717	0.47661	-1.07006	0.621976	-1.81753	0.002343
A_24_P915904	-1.11563	0.47661	1.57035	0.0688502	1.57	0.0737381
A_24_P694998	-1.09624	0.476503	1.00982	0.969615	1.56184	0.03492
A_24_P260134	1.11055	0.475863	-1.08658	0.677374	-1.6586	0.0218108
A_23_P33015	-1.05606	0.475863	1.50135	0.00763628	1.62014	0.00262619
A_23_P254612	-1.2585	0.475771	1.30594	0.0856814	1.98185	0.0025118
A_24_P126262	1.06059	0.475542	1.16623	0.218147	1.86852	0.00121049
A_32_P205596	1.07588	0.475231	1.1413	0.364622	-1.59555	0.00933136
A_23_P252062	1.14033	0.47501	1.14579	0.381164	1.64002	0.00952068
A_24_P558070	1.14461	0.474313	1.17557	0.604054	-1.64489	0.0992353
A_23_P119102	1.08192	0.474014	-1.01379	0.944399	-1.9544	0.00250984
A_24_P927886	-1.07721	0.474014	-1.06458	0.696387	1.66583	0.00827155
A_23_P74022	-1.086	0.473751	1.02834	0.896345	-1.52764	0.0243676
A_23_P212360	-1.11308	0.473751	-1.11428	0.645582	-1.53211	0.0616272
A_24_P288954	1.13152	0.473532	-1.14623	0.614781	-1.84544	0.0361842
A_23_P370588	1.06552	0.473436	2.02752	0.00134321	2.31581	0.000321831
A_24_P73109	-1.14476	0.473205	-1.24165	0.456832	-1.79392	0.0532646
A_24_P680908	1.074	0.472763	1.10973	0.486368	1.78614	0.00433818
A_23_P136013	1.10064	0.472763	1.15543	0.435948	1.62468	0.0254507
A_23_P119583	-1.15121	0.471686	1.12919	0.517124	1.81894	0.0108748
A_23_P217712	1.06277	0.471686	1.34228	0.0356601	1.6536	0.00365195
A_23_P165390	1.08235	0.471437	1.5201	0.0309478	1.53802	0.0261109
A_23_P40455	1.10957	0.471401	1.2139	0.372754	1.62761	0.0428134
A_23_P113728	1.03971	0.470267	1.03028	0.705645	-1.62121	0.000234721
A_24_P320163	1.12231	0.470141	1.01621	0.959181	1.65222	0.0542187
A_32_P114860	1.08989	0.46995	1.25682	0.203549	1.73545	0.0103025
A_23_P132826	-1.12419	0.469793	-1.05158	0.843816	-1.55097	0.0616836
A_23_P65741	-1.0877	0.469563	-1.04263	0.839693	-1.64964	0.0137924
A_24_P340112	1.09698	0.46944	1.22635	0.267368	1.54172	0.0368664
A_24_P887239	1.11693	0.469415	-1.05755	0.832518	1.58675	0.0583421
A_24_P717609	1.05396	0.469011	1.03785	0.756652	1.52529	0.00402365
A_23_P164650	1.07943	0.468774	-1.28961	0.0425487	1.74626	0.000326259
A_23_P81612	1.09809	0.468667	-1.02465	0.921745	2.1063	0.00488802
A_24_P337397	-1.10547	0.46866	-1.03132	0.887255	-1.52825	0.0386631
A_23_P207170	-1.06167	0.468164	-1.29794	0.0334675	-1.62089	0.0018923
A_23_P80129	-1.07566	0.467973	-1.46983	0.0266614	-1.64331	0.00996419
A_24_P219952	-1.06814	0.467874	-1.13015	0.367255	-1.64879	0.00633719
A_23_P101351	1.04592	0.466732	1.86109	0.000872203	1.26318	0.0251854
A_24_P324479	-1.05639	0.466685	1.6198	0.00447277	-1.30138	0.038869
A_24_P82880	1.15704	0.466559	1.31869	0.362125	2.4255	0.0156868
A_23_P337899	-1.18049	0.466388	-1.00011	0.999755	2.0993	0.0457305
A_32_P61708	1.10321	0.466388	-1.11367	0.600503	1.70481	0.0220642
A_23_P6935	1.10157	0.466201	1.04807	0.835999	1.55338	0.0409874
A_24_P560536	-1.16514	0.465251	-1.01801	0.967552	-1.91949	0.0580188
A_23_P133916	-1.1797	0.465251	-1.2964	0.437085	-2.18524	0.0389184
A_23_P74895	1.06621	0.464743	1.38494	0.0285859	1.63481	0.00433343
A_23_P433791	1.09792	0.463818	1.6903	0.0210401	1.35446	0.129988
A_23_P431410	1.06155	0.463602	-1.18515	0.0992254	-2.85735	8.27373e-05
A_23_P252748	1.07306	0.463546	-1.18708	0.244155	1.63971	0.00437645
A_23_P217804	1.12922	0.463546	1.52122	0.0971156	1.42187	0.149864
A_32_P72351	-1.1706	0.462706	-1.41288	0.251476	-2.16745	0.029259
A_23_P156261	1.06421	0.462684	1.06903	0.548489	-2.32103	0.00022159
A_24_P596251	1.11279	0.46266	-1.15397	0.483916	1.89999	0.00810074
A_32_P42684	-1.15365	0.46266	-1.51005	0.160416	-1.80598	0.0651534
A_24_P349788	-1.12711	0.462254	1.16945	0.535556	1.58663	0.080997
A_24_P236445	-1.11941	0.462207	-1.63502	0.0442543	-1.97102	0.0143587
A_23_P38519	1.07333	0.462207	1.83695	0.000831643	1.40369	0.0342916
A_32_P172298	-1.16323	0.462154	-1.26912	0.433092	-2.03322	0.0376857
A_32_P334875	-1.12574	0.461348	-1.56993	0.0688326	-1.79002	0.0307807
A_23_P339098	-1.07006	0.46071	1.12208	0.343861	1.70416	0.00305308
A_23_P215819	1.03751	0.460258	-1.13043	0.115597	1.60859	0.000469756
A_24_P570930	1.10642	0.46023	1.15373	0.478081	1.50092	0.0593048
A_24_P346517	1.18253	0.460188	-1.96803	0.0747374	-1.06712	0.853704
A_32_P179998	-1.09116	0.460127	1.04552	0.807619	-1.57151	0.0133191
A_23_P119583	-1.09484	0.460124	1.12919	0.517124	1.81894	0.0108748
A_23_P44974	-1.08822	0.460124	-1.30293	0.116477	-1.60822	0.0174582
A_24_P566831	1.09735	0.459668	1.73551	0.0134825	2.39996	0.00180998
A_23_P4922	1.04353	0.458783	-1.05929	0.482028	1.61042	0.000765684
A_23_P166154	1.04205	0.458306	-1.00286	0.977922	1.80924	0.000176702
A_23_P217510	1.20359	0.457788	-1.15851	0.70654	-1.88191	0.0965217
A_23_P123448	1.11314	0.456602	-1.05627	0.823981	-1.56745	0.055821
A_24_P930432	1.14522	0.456602	-1.13388	0.651622	-1.59923	0.0841599
A_24_P150361	1.09459	0.456348	1.20906	0.232517	1.76583	0.00726407
A_32_P58913	1.04528	0.456137	1.24941	0.0163149	1.61353	0.000489531
A_23_P109143	-1.10067	0.455967	1.5455	0.0868088	-2.03745	0.000399368
A_23_P259462	-1.10176	0.454876	-1.47333	0.0399906	-2.68518	0.000858719
A_23_P19210	1.09109	0.45433	1.56009	0.0193218	1.30808	0.0999303
A_23_P367899	-1.13036	0.453442	-1.04737	0.86824	1.96355	0.0152232
A_24_P53406	1.15683	0.453442	-2.21377	0.0249543	-1.26864	0.381399
A_23_P166716	-1.06543	0.453442	1.68715	0.00961209	-1.71019	0.00211132
A_24_P81841	-1.09906	0.453337	1.72324	0.015545	2.27296	0.000227748
A_23_P336728	1.14539	0.452802	-1.13041	0.625722	-2.04968	0.0131499
A_32_P98348	1.07069	0.452653	1.61511	0.00687194	-1.17865	0.213391
A_24_P655458	1.1842	0.452229	-1.99236	0.0652819	-1.00659	0.985131
A_23_P218841	-1.06219	0.451505	1.03719	0.772927	2.18574	0.000356727
A_32_P6682	1.1578	0.45114	-1.13736	0.66941	1.66064	0.0877918
A_23_P306655	1.07837	0.450731	-1.11693	0.46516	2.01298	0.00156759
A_23_P123905	-1.09311	0.450391	-1.06921	0.716007	-1.86732	0.00491189
A_23_P135948	1.0695	0.450391	1.11629	0.411635	1.51544	0.00794667
A_32_P5628	-1.06639	0.449676	1.06023	0.61944	-1.61805	0.00313949
A_23_P137543	-1.08963	0.449266	-1.31382	0.104778	-1.94755	0.00356739
A_23_P213706	-1.21969	0.449266	1.35794	0.0103107	-1.75898	0.00926459
A_23_P93122	1.1447	0.449066	-1.3826	0.197527	-2.08317	0.0170491
A_23_P428382	-1.09985	0.449066	1.56639	0.0314683	1.12963	0.513098
A_23_P167444	1.04847	0.448582	-1.89538	0.000872203	1.09245	0.351541
A_23_P65797	-1.15163	0.448398	1.14567	0.633053	2.05406	0.0207431
A_24_P205252	-1.09549	0.447876	-1.06935	0.730604	-1.66836	0.0133475
A_32_P75902	-1.11269	0.447781	1.29114	0.222162	-1.55218	0.0521999
A_32_P5995	-1.0823	0.446555	1.02952	0.871856	1.55138	0.0172665
A_32_P429083	-1.07745	0.446555	-1.35604	0.0452631	-1.56731	0.0102318
A_23_P139260	1.08896	0.446509	1.39325	0.0697461	1.85916	0.00642135
A_23_P343766	-1.15059	0.446006	-1.02485	0.945096	2.00102	0.0309931
A_23_P60248	1.12938	0.445838	1.39456	0.163519	2.02925	0.013875
A_32_P29118	1.06786	0.445724	1.60882	0.00768198	1.85527	0.00160228
A_24_P106057	-1.06214	0.44526	-1.09107	0.424794	-1.53844	0.00387197
A_24_P892367	-1.07192	0.44526	1.53144	0.0106093	1.3994	0.0272652
A_23_P360534	-1.11374	0.444773	-1.12456	0.581057	-1.86283	0.0139462
A_23_P142849	1.10546	0.444741	1.15247	0.152597	1.57483	0.0326581
A_24_P823514	-1.12646	0.444605	1.06765	0.808743	1.76198	0.0343617
A_23_P207213	1.14253	0.442065	1.04014	0.898646	1.68454	0.0600342
A_23_P70849	-1.12056	0.442025	1.53973	0.00378712	-1.95459	0.00146155
A_24_P920646	1.13486	0.441508	1.60494	0.0626371	1.65525	0.057195
A_32_P105228	-1.14371	0.441268	-1.19083	0.521743	-1.70304	0.0646513
A_23_P255126	-1.05926	0.441005	1.07352	0.553178	-1.98171	0.000515382
A_23_P104689	1.11797	0.440616	1.40706	0.0116511	1.63815	0.0390763
A_23_P75509	1.28877	0.44053	-1.54123	0.352961	-2.36407	0.086596
A_23_P413043	-1.09591	0.439827	-1.02991	0.888824	-1.67973	0.0140424
A_32_P211752	-1.18581	0.439827	-1.64317	0.101195	-2.00117	0.0368906
A_24_P42781	-1.28232	0.439703	-1.68686	0.284234	-2.37131	0.0952179
A_23_P151746	1.15345	0.439376	1.61747	0.0862265	1.97462	0.0310249
A_23_P256835	-1.2968	0.43872	-1.12742	0.839213	-2.65768	0.0748907
A_32_P128391	1.05085	0.438304	1.5801	0.00184698	1.76381	0.000482736
A_23_P12572	-1.26363	0.437996	-1.03648	0.952574	-2.42984	0.0735969
A_23_P3014	-1.15557	0.437755	-1.11931	0.697698	-1.69426	0.0694233
A_24_P923554	1.10772	0.436936	-1.6736	0.0276153	1.3434	0.117602
A_23_P309619	1.12915	0.436778	1.08243	0.765519	1.65526	0.0485005
A_24_P538403	-1.12403	0.43582	-1.09638	0.676955	-1.88277	0.0106065
A_23_P323252	1.15075	0.43582	1.79112	0.0507349	1.64707	0.0883035
A_32_P44808	1.05822	0.435045	1.03388	0.781272	-1.59015	0.00263487
A_23_P14508	1.15887	0.434857	1.15262	0.621976	1.82358	0.0348082
A_23_P48826	-1.12066	0.434718	1.07432	0.755495	-1.75061	0.0223047
A_23_P16648	-1.14789	0.433017	-2.00336	0.0121294	-3.41043	0.000985253
A_32_P60076	1.05842	0.432184	-1.50876	0.00153703	-1.79189	0.00023379
A_23_P83347	-1.05419	0.432021	-1.71594	0.00182965	-1.28991	0.0209003
A_23_P353679	-1.06382	0.431947	-1.31995	0.021652	-1.84161	0.000754482
A_32_P125639	1.11295	0.431768	1.14481	0.527236	1.8064	0.0177851
A_23_P30075	-1.08265	0.431256	1.12804	0.47345	1.73053	0.00665668
A_24_P128727	1.13955	0.431192	-1.22915	0.400729	-1.58141	0.0785478
A_32_P86578	1.14899	0.431084	1.56859	0.0999337	-1.22473	0.452294
A_23_P206612	1.04765	0.431075	1.62806	0.000872203	1.45792	0.00111163
A_32_P871061	1.09764	0.431064	-1.02044	0.926625	2.21014	0.00225181
A_24_P139152	1.13029	0.430176	1.1441	0.577727	-1.55462	0.0712814
A_24_P316363	1.09403	0.429669	1.55529	0.0263212	1.70732	0.0120009
A_24_P274270	1.10396	0.429248	1.14188	0.425661	-2.91666	0.000541946
A_24_P250650	-1.17013	0.429228	-1.27862	0.402924	-1.89913	0.0488296
A_23_P71530	-1.10401	0.42912	-1.32969	0.153472	-1.58587	0.000993745
A_23_P47034	-1.10099	0.428997	-1.05169	0.800996	-1.87301	0.0056054
A_32_P203404	1.11855	0.427249	1.10698	0.650955	1.70691	0.0275342
A_23_P92710	1.09544	0.426891	1.34441	0.0963653	1.57554	0.0257573
A_23_P117782	-1.13289	0.426813	-1.25426	0.315701	-1.94826	0.0165046
A_23_P15669	1.14391	0.426346	1.07357	0.807208	-1.71522	0.0518369
A_32_P33083	1.19353	0.426311	-1.8589	0.0934977	1.06164	0.863824
A_24_P178396	1.0924	0.426261	-1.10985	0.469341	1.60395	0.00861001
A_23_P81805	-1.0801	0.426061	1.29346	0.0810479	-1.9242	0.00720422
A_23_P208900	1.11127	0.426061	1.57068	0.0435995	1.65658	0.0290811
A_23_P67411	-1.20368	0.425785	-1.33976	0.384313	-2.18697	0.0309471
A_24_P342171	1.08576	0.425181	1.26423	0.125328	1.59913	0.0118389
A_23_P143867	-1.08407	0.425181	-1.3787	0.0379645	-2.0656	0.00138023
A_24_P24230	1.07351	0.425131	1.02479	0.880186	1.51566	0.0132598
A_23_P72968	-1.09283	0.424961	1.11066	0.53245	1.67556	0.0122207
A_24_P201552	1.09339	0.424961	2.0325	0.00475064	2.86777	0.000532091
A_24_P279938	1.05803	0.424943	1.11087	0.315905	1.78928	0.00101682
A_23_P89727	1.0442	0.424676	1.52822	0.00248478	-1.02462	0.758688
A_32_P67623	1.11388	0.424623	-1.47592	0.0646927	-1.5015	0.0579343
A_23_P215233	1.11398	0.424068	-1.03326	0.89907	1.68666	0.0238784
A_24_P230116	1.13958	0.423606	1.14855	0.571045	1.92581	0.0132202
A_23_P9756	1.08924	0.423445	-1.0579	0.769814	-1.84527	0.00554299
A_32_P735636	-1.07621	0.423351	-2.08748	0.00122537	-2.66213	0.000143576
A_24_P322741	-1.08763	0.42288	-1.03098	0.843563	1.82294	0.00259787
A_24_P918891	-1.08146	0.42247	-1.50701	0.0173983	1.01522	0.917791
A_24_P185186	1.11216	0.42245	1.32495	0.153109	-1.8427	0.0112357
A_32_P210525	1.09236	0.422398	1.22715	0.216394	1.58814	0.0179094
A_32_P138213	-1.13259	0.422361	-1.01581	0.960112	-1.55537	0.0797253
A_24_P927840	1.07118	0.422159	1.06239	0.644989	1.60629	0.00522399
A_24_P889070	-1.11599	0.421832	-1.14665	0.529227	1.51626	0.0557338
A_24_P43959	1.20437	0.4214	1.56908	0.195032	1.9685	0.0715904
A_24_P66125	1.06811	0.421051	-1.19108	0.0721389	-2.04583	0.000266854
A_24_P50937	1.20257	0.419735	-1.11238	0.780819	1.8835	0.0764432
A_23_P120354	1.12362	0.419735	-1.16381	0.491196	1.72622	0.0268406
A_24_P913489	-1.18445	0.418874	-1.32279	0.350758	-2.14328	0.0296271
A_23_P215790	-1.22009	0.418858	-1.76444	0.0271942	-3.82554	0.000233729
A_23_P107206	-1.11087	0.418818	1.34553	0.00687194	1.77676	0.000344684
A_23_P89431	-1.07828	0.418818	-1.32723	0.00406145	-1.8262	0.000139901
A_23_P154585	-1.15153	0.418671	-1.65217	0.0642341	-1.36044	0.225307
A_23_P10127	1.09855	0.418629	-1.03768	0.85688	1.71114	0.0138407
A_23_P13102	-1.07843	0.418629	-1.1053	0.455973	-1.5074	0.0105485
A_23_P26024	-1.14008	0.418565	1.23387	0.344342	1.62572	0.0513426
A_23_P15045	1.05347	0.417987	1.26898	0.0097319	1.92741	0.000129955
A_24_P19752	1.07423	0.417987	1.77069	0.00339131	1.01605	0.903789
A_24_P332971	-1.13369	0.417704	1.08167	0.763353	1.63662	0.0491232
A_24_P932416	1.08074	0.417487	1.03445	0.827139	1.63313	0.00648622
A_24_P343233	1.06097	0.416857	1.17434	0.0387691	-3.16759	0.00381617
A_23_P255016	1.15038	0.416788	1.10736	0.683143	1.58171	0.0688173
A_23_P34942	-1.18993	0.416788	-1.30379	0.395287	-2.12642	0.0330443
A_23_P218918	-1.07289	0.416666	-1.3052	0.031629	-2.61287	0.00156759
A_23_P211233	1.07488	0.416277	1.02505	0.879718	2.80426	0.00017946
A_24_P410627	-1.05829	0.416277	-1.08763	0.310498	-1.61149	0.000913187
A_24_P117029	-1.26447	0.415656	-1.26367	0.605512	-2.12789	0.090442
A_24_P936419	-1.04633	0.415327	-1.03073	0.714138	-1.57522	0.000601267
A_24_P940915	-1.25217	0.415025	-1.32436	0.512979	-2.07116	0.0939582
A_32_P37988	1.14748	0.414781	1.39727	0.131101	1.83984	0.0207754
A_23_P216649	1.08675	0.414502	1.54987	0.0189097	1.85435	0.00345986
A_23_P250735	-1.08763	0.414472	1.02322	0.901444	-2.24334	0.00107491
A_24_P394420	-1.15633	0.414212	-1.20108	0.486018	-2.2019	0.0142805
A_32_P936189	1.06122	0.414195	-1.00605	0.965227	2.09405	0.000308448
A_23_P253464	1.10848	0.414023	1.58003	0.0135995	2.04412	0.00175864
A_23_P301372	-1.11579	0.413471	-1.21392	0.318079	-1.95202	0.00882461
A_32_P24266	1.21729	0.413111	-1.9003	0.0967635	-1.1289	0.733658
A_24_P394368	-1.13636	0.412929	-1.38551	0.130963	-1.51343	0.0672009
A_23_P114134	-1.14186	0.412715	-1.35207	0.20139	-1.60724	0.0675855
A_23_P53137	-1.10179	0.412534	1.22575	0.227625	-1.56576	0.0203399
A_23_P206359	1.09838	0.412065	-1.58677	0.0224256	-1.98133	0.0044654
A_23_P338919	1.10721	0.411891	1.53173	0.0407128	1.32315	0.142548
A_32_P35506	-1.11249	0.411438	-1.00927	0.972384	-1.56921	0.0420116
A_23_P38630	-1.05526	0.411438	-1.3289	0.00349947	-2.31316	5.06766e-05
A_24_P365180	1.07802	0.411192	-1.03752	0.811533	1.51701	0.0115522
A_24_P10214	1.04516	0.410521	1.31167	0.00396472	1.63483	0.000256825
A_24_P922653	-1.11009	0.410349	-1.28589	0.177748	-1.80502	0.0121679
A_23_P56304	1.06405	0.409756	1.74562	0.00236079	1.83794	0.000846635
A_24_P329152	1.08041	0.409266	1.12765	0.415692	1.65406	0.00729198
A_32_P220591	1.16806	0.409012	1.06797	0.841098	1.84091	0.0493754
A_23_P117286	-1.05001	0.408705	-1.09511	0.23065	-1.51109	0.000931906
A_23_P162486	-1.13663	0.408548	1.36947	0.223687	-2.06332	0.0134749
A_24_P181506	1.11772	0.408429	1.09333	0.689217	1.56277	0.0416532
A_24_P312519	1.06964	0.408111	1.08505	0.351551	1.55289	0.00163989
A_32_P37495	1.09023	0.407867	1.02175	0.90492	1.57816	0.0112823
A_23_P77223	-1.09661	0.407123	-1.00086	0.997021	2.50193	0.000683048
A_23_P502142	-1.11449	0.406876	1.23822	0.00804238	-1.68467	0.00037205
A_23_P104798	1.06828	0.406844	-1.62131	0.1758	-2.53001	0.023503
A_23_P150198	1.07835	0.406844	1.93749	0.00303372	1.60973	0.00594171
A_23_P201538	-1.145	0.406586	-1.46177	0.0257736	-2.36128	0.000813122
A_23_P78170	1.08181	0.406218	1.09796	0.495606	1.60278	0.00798405
A_23_P62881	-1.05366	0.405641	1.01406	0.904071	-1.5109	0.0016543
A_24_P50801	1.09796	0.405208	1.09813	0.609367	1.91904	0.00522294
A_32_P139738	-1.19197	0.404828	-1.00473	0.990959	2.51196	0.0150902
A_24_P56884	-1.06476	0.404528	1.40405	0.011177	1.92087	0.00044161
A_23_P5031	-1.11655	0.404404	-1.52067	0.0480212	-1.0713	0.721655
A_32_P99097	-1.08045	0.404332	-1.05373	0.720819	1.57121	0.0092278
A_24_P941930	1.06012	0.404332	1.12019	0.166367	1.56112	0.00111457
A_24_P940633	-1.1319	0.404279	-1.14068	0.555254	-1.74791	0.0272708
A_32_P117804	-1.09071	0.40381	1.38018	0.0454915	1.67906	0.00770825
A_23_P96611	-1.07603	0.403595	-1.33312	0.0359619	-1.91478	0.00109025
A_24_P936589	1.09784	0.403595	1.49664	0.0269252	2.02095	0.00275357
A_24_P321525	1.09817	0.403595	1.72914	0.00768198	1.6815	0.00894467
A_32_P154139	1.13103	0.403352	1.23382	0.359824	1.99924	0.0128156
A_32_P233870	-1.05368	0.403092	-1.08705	0.176606	1.51947	0.000447202
A_23_P311732	1.11695	0.402836	1.16023	0.447326	1.88726	0.0097653
A_24_P373877	-1.10079	0.402836	1.35774	0.0732939	-1.64082	0.0125107
A_23_P34496	1.15236	0.402591	1.3188	0.273493	2.17264	0.0126779
A_23_P20728	1.07872	0.402515	-1.0108	0.949646	1.53195	0.00846817
A_24_P588633	1.08943	0.402515	-1.23857	0.177665	2.08259	0.00205687
A_23_P205273	-1.05099	0.402035	-2.31078	0.00030273	-1.0711	0.327426
A_23_P153360	1.07003	0.402034	1.51275	0.00813852	1.28009	0.0375563
A_24_P261734	-1.10466	0.401512	-1.18399	0.322136	-1.9973	0.00417884
A_23_P380951	-1.11394	0.401512	-1.22946	0.272561	-2.052	0.00563429
A_24_P923215	1.0963	0.400712	1.79734	0.0066731	1.34945	0.077713
A_32_P17484	-1.04585	0.39927	1.595	0.000812519	-1.0757	0.235053
A_23_P145024	1.07772	0.398928	1.32641	0.0071206	-2.18155	0.00108015
A_32_P225129	1.07808	0.39681	-1.07961	0.607702	1.9058	0.00192792
A_32_P231415	-1.07412	0.396545	-1.01083	0.944399	-2.20812	0.000415433
A_23_P76799	-1.17209	0.396545	1.36529	0.0120498	-1.73916	0.0546206
A_23_P209689	1.20734	0.396148	1.64757	0.136782	2.09708	0.047416
A_23_P153236	-1.13186	0.396148	-1.20447	0.378437	-1.90136	0.0142906
A_24_P130952	-1.05209	0.395899	1.32248	0.0126189	-1.61955	0.0010322
A_24_P42633	-1.13761	0.395788	1.1258	0.302638	1.75821	0.0134718
A_24_P104091	1.06022	0.395788	1.33857	0.0170109	2.18937	0.000208045
A_23_P141688	-1.12582	0.395385	-1.61046	0.0450537	-1.03824	0.868668
A_23_P103968	1.15802	0.394947	1.49268	0.127576	2.08236	0.0183923
A_32_P191717	-1.06238	0.394589	-1.0239	0.824541	-1.92693	0.000259836
A_24_P25234	1.05184	0.394083	1.51437	0.000851347	1.20147	0.0139983
A_23_P316239	1.16362	0.394024	1.55116	0.110511	1.7809	0.0498943
A_24_P329424	-1.12465	0.393589	1.24438	0.273958	-4.55704	0.000207202
A_32_P165407	1.09275	0.393562	1.50597	0.0171221	1.75893	0.00365096
A_23_P66844	-1.12381	0.392305	-1.5673	0.0471896	-1.49812	0.061582
A_23_P160968	1.04401	0.392227	-1.05504	0.441524	-1.55017	0.000590515
A_23_P165848	-1.18966	0.392131	1.06163	0.865786	1.89546	0.0484943
A_24_P246573	1.14591	0.39201	1.20619	0.423564	1.88697	0.0195962
A_24_P15083	-1.08987	0.39201	-1.59596	0.0097319	-1.5583	0.011785
A_23_P380834	-1.10709	0.391913	-1.02846	0.903692	-1.76829	0.0118988
A_23_P401098	1.07272	0.391867	1.14393	0.244754	1.55875	0.00381944
A_24_P210406	-1.07805	0.390637	-1.28833	0.0715749	-1.58308	0.00635778
A_23_P203558	1.16032	0.39045	-1.17538	0.133284	-1.63321	0.013246
A_24_P313186	1.14849	0.390294	1.86179	0.027791	1.65466	0.058691
A_23_P41645	1.07458	0.390131	-1.06256	0.631222	1.50641	0.00667624
A_23_P308603	1.09001	0.390131	1.14898	0.150791	-1.83435	0.000476366
A_23_P77328	1.09409	0.389951	1.4092	0.0517685	2.23482	0.00146973
A_23_P25121	1.14638	0.389763	1.07921	0.775003	1.75041	0.0376049
A_23_P106362	-1.07604	0.38962	-1.32812	0.0315759	-1.54193	0.00585515
A_23_P164650	-1.08156	0.389401	-1.28961	0.0425487	1.74626	0.000326259
A_23_P119311	1.05573	0.389401	1.2172	0.0381717	2.32744	7.64922e-05
A_23_P330611	-1.05883	0.388632	1.9611	0.000812519	1.86514	0.000315483
A_24_P408715	-1.12769	0.388601	-1.3167	0.184025	-1.53641	0.0605837
A_32_P71730	1.13835	0.388419	-1.1115	0.650521	1.61641	0.0497532
A_23_P29608	-1.1814	0.38824	-1.2002	0.531242	-1.66439	0.0704965
A_23_P321496	1.10795	0.387638	-1.053	0.799156	2.51813	0.000835879
A_24_P922261	1.10819	0.387638	1.37945	0.0790773	1.68685	0.0144265
A_23_P87216	-1.06563	0.387579	-1.11533	0.309725	-1.7427	0.00147855
A_23_P501795	-1.16973	0.387502	-1.10056	0.75234	-1.63739	0.0772275
A_24_P250922	-1.07575	0.387502	-1.11384	0.225973	-1.84505	0.000755127
A_23_P56913	-1.06538	0.387061	1.01866	0.878389	1.50742	0.00370835
A_24_P353103	1.12145	0.386988	1.37163	0.109218	1.50303	0.0496649
A_23_P325676	1.16015	0.386905	-1.18	0.519963	-1.87855	0.0305945
A_32_P83556	-1.07226	0.386186	1.00947	0.946059	1.62458	0.00239484
A_24_P100664	1.07574	0.385533	1.46365	0.00906941	2.10766	0.000470604
A_24_P403303	1.09228	0.384518	-1.61267	0.0140534	1.10015	0.487631
A_24_P384379	1.20617	0.384295	-1.00791	0.985866	1.93788	0.0649373
A_32_P19294	-1.11193	0.383981	-1.08973	0.624242	-1.59405	0.0196522
A_23_P388851	1.05429	0.383963	-1.19159	0.0569753	1.63558	0.000908595
A_24_P230313	1.10226	0.383763	1.2332	0.177748	1.50363	0.0261716
A_24_P50918	1.12727	0.383763	1.83781	0.013977	1.59758	0.0393086
A_23_P9232	-1.12558	0.383608	-1.41389	0.0925088	-2.39287	0.0025913
A_23_P97947	-1.18654	0.38352	-1.31382	0.306821	-1.65572	0.0827547
A_24_P488352	-1.0665	0.383288	1.12231	0.308029	-1.5514	0.00432692
A_23_P21929	1.13781	0.383015	1.42089	0.121326	1.54282	0.0699045
A_24_P352608	1.11565	0.382552	-1.92754	0.0095108	1.04394	0.815075
A_24_P272254	-1.10878	0.382504	-1.68942	0.00913249	-1.76619	0.00614308
A_23_P412321	1.13062	0.382278	-1.03816	0.763023	-1.88187	0.000894358
A_24_P242688	1.14779	0.382101	-1.13109	0.624334	-1.85119	0.0272768
A_23_P93442	1.13726	0.382101	1.18445	0.434578	2.11874	0.00810921
A_24_P576650	1.064	0.3821	1.2194	0.0637444	1.51697	0.00385016
A_24_P100234	-1.15326	0.382088	-1.0285	0.91206	1.7057	0.0267514
A_23_P38519	1.05721	0.382088	1.83695	0.000831643	1.40369	0.0342916
A_23_P61268	-1.05436	0.382087	1.04843	0.571297	1.68969	0.000313167
A_23_P18903	-1.07091	0.381782	1.6595	0.00430772	1.18193	0.14726
A_23_P383325	1.07332	0.379351	-1.06213	0.623085	1.83405	0.00101354
A_24_P207479	1.05369	0.379112	1.25222	0.0234024	1.62485	0.000700935
A_32_P143824	-1.11025	0.378965	1.42377	0.049709	1.75374	0.00907912
A_24_P917783	-1.14008	0.377936	-1.44889	0.0802214	-1.8796	0.0126152
A_23_P92499	1.07725	0.377936	1.39349	0.040364	1.77195	0.00479558
A_24_P132813	1.0731	0.377936	1.5358	0.00501435	2.34925	0.000162367
A_23_P107087	1.15543	0.377474	-1.45016	0.10912	-2.27389	0.00650655
A_24_P457164	-1.12273	0.377339	-1.67326	0.016116	-1.18608	0.32298
A_23_P351744	1.18678	0.37694	1.28203	0.394222	1.92445	0.0437139
A_23_P167227	1.11452	0.375707	1.08404	0.649258	4.09728	0.000162367
A_23_P71530	1.07921	0.375218	-1.32969	0.153472	-1.58587	0.000993745
A_23_P365248	1.10949	0.375071	-1.07674	0.701596	-1.67028	0.0160871
A_23_P41025	-1.15942	0.374964	-1.02908	0.926166	-1.6007	0.0771421
A_23_P164284	-1.11829	0.374964	1.62847	0.021991	2.61699	0.00107099
A_23_P203201	-1.1225	0.374696	-1.31988	0.130663	-1.6012	0.0196966
A_32_P225472	-1.17204	0.374077	-1.21301	0.473235	-1.99281	0.0274266
A_24_P239538	1.08774	0.373975	1.76383	0.00496981	1.80153	0.00310078
A_24_P927693	1.12518	0.373391	1.17238	0.377243	1.93531	0.00652167
A_23_P383053	1.10772	0.372771	1.32777	0.103343	1.66556	0.0135128
A_23_P17269	1.07969	0.372443	-1.46452	0.023169	-1.86203	0.00307643
A_23_P81859	1.09487	0.37238	1.17167	0.298319	2.56109	0.000636073
A_32_P45087	1.09754	0.37238	1.16407	0.292148	1.56549	0.0111037
A_23_P28886	1.06724	0.37238	1.46887	0.0059972	-1.71414	0.00655845
A_32_P823560	1.07858	0.371528	-1.11401	0.381535	1.56664	0.00430558
A_23_P202156	-1.09742	0.371065	-1.13723	0.103116	-1.69931	0.000347768
A_24_P418138	-1.14379	0.370568	1.04754	0.858721	-1.70064	0.0279412
A_24_P924504	-1.09217	0.370568	1.14993	0.296023	2.10222	0.00106045
A_23_P141520	-1.1008	0.370321	1.38413	0.0630294	2.12819	0.00224272
A_24_P926095	1.10949	0.369657	1.31562	0.120615	1.96187	0.00466602
A_32_P34941	-1.16713	0.369657	1.5931	0.0815487	1.49707	0.127163
A_32_P110699	-1.13199	0.369564	1.18226	0.398814	1.71218	0.0227605
A_23_P218743	-1.16597	0.368956	1.01925	0.954884	-1.95605	0.0269009
A_23_P208198	1.11104	0.368759	-1.05571	0.785025	2.02688	0.00382081
A_24_P539080	-1.16022	0.368351	-1.87043	0.0181409	-1.74185	0.0263697
A_24_P212389	-1.08653	0.36811	-1.03906	0.810643	-1.62838	0.00552447
A_32_P28704	-1.28584	0.367956	-2.02434	0.107407	-2.39821	0.0613042
A_24_P359859	1.16004	0.367665	1.19121	0.43084	-1.57285	0.0622112
A_23_P49865	-1.21812	0.366934	-1.34407	0.332531	-2.69491	0.0112072
A_23_P404045	1.14442	0.366712	-1.16871	0.490143	1.74347	0.0303361
A_24_P227121	-1.06675	0.366712	1.32187	0.0220696	1.59697	0.00222284
A_24_P310667	1.06307	0.366564	1.42783	0.00999575	1.8249	0.000819352
A_24_P305993	-1.16929	0.366311	-1.15819	0.548725	-1.76637	0.0297261
A_23_P77066	-1.24636	0.366311	-1.74465	0.133641	-1.99536	0.0821875
A_24_P298360	-1.09302	0.366123	-1.06783	0.681195	1.79156	0.00471018
A_23_P69491	-1.14287	0.365512	1.35901	0.070306	-1.51804	0.00299968
A_23_P251342	1.06292	0.365343	-1.23675	0.10149	-1.51085	0.001395
A_23_P135769	1.13227	0.365343	-2.50401	0.0242963	1.673	0.000472045
A_24_P823768	1.05265	0.365225	1.1392	0.102027	1.63188	0.000610824
A_23_P253464	1.12401	0.364908	1.58003	0.0135995	2.04412	0.00175864
A_24_P802963	1.14082	0.364632	1.5637	0.0534914	1.08743	0.702916
A_24_P54174	-1.12824	0.364632	-1.46818	0.0417475	-1.67501	0.0148848
A_24_P933108	-1.05728	0.364632	1.23182	0.0266614	1.64807	0.000571084
A_23_P212149	-1.08344	0.364504	1.06129	0.649888	-1.96363	0.000893323
A_24_P20607	1.15358	0.364229	1.2193	0.399346	1.6415	0.0534227
A_23_P369237	1.15704	0.362365	-1.26975	0.299254	-1.5335	0.0790489
A_23_P65963	1.05388	0.3617	1.55988	0.00281837	1.13006	0.157457
A_23_P407115	-1.07371	0.361694	-1.10575	0.325943	-1.70765	0.00123157
A_23_P502750	-1.10317	0.361694	-1.37709	0.101889	-1.90504	0.002343
A_32_P215474	-1.10039	0.361293	1.84502	0.00268013	1.70124	0.00365096
A_32_P232327	-1.15627	0.360946	-1.21902	0.419202	-1.51967	0.0999528
A_24_P557019	-1.16678	0.360946	-1.41284	0.172413	-3.313	0.00173922
A_24_P913956	-1.11536	0.360686	1.02278	0.920566	-1.57299	0.0306667
A_32_P4647	1.06742	0.360686	-1.07802	0.419169	1.50666	0.00283508
A_24_P917123	1.15585	0.360521	1.26249	0.32134	1.5256	0.0880801
A_23_P8513	1.125	0.360521	-1.36145	0.0963653	-1.90039	0.00757073
A_23_P73702	1.08365	0.360512	-1.22649	0.104977	-1.78063	0.00159826
A_24_P918454	-1.10685	0.360213	1.01225	0.953393	-1.57511	0.0185828
A_32_P217543	-1.18841	0.360201	-1.32445	0.321685	-1.6836	0.0787549
A_23_P71064	1.1657	0.360201	1.67291	0.0569214	1.4826	0.136461
A_23_P105423	-1.07075	0.360087	-1.55765	0.00614584	1.29654	0.0351876
A_23_P395418	1.06122	0.359798	1.56499	0.00269975	1.5612	0.00189087
A_23_P46549	-1.28051	0.359348	1.09128	0.847733	2.00692	0.0934143
A_24_P337239	-1.10092	0.358956	-1.04097	0.818668	2.1285	0.00163053
A_24_P333461	-1.11724	0.35878	1.03815	0.840118	1.78433	0.00687704
A_32_P80198	1.10579	0.358602	1.18272	0.290252	1.65518	0.0123257
A_23_P112652	-1.09275	0.358366	1.79326	0.0032307	-1.03739	0.783215
A_23_P200560	1.06024	0.358244	1.16053	0.0972236	1.89222	0.000310558
A_23_P209011	1.10962	0.358162	1.41643	0.0471019	2.06742	0.00255941
A_24_P26114	-1.21961	0.357972	-1.31356	0.400748	-4.88884	0.00162745
A_23_P311020	-1.13696	0.357745	-1.08292	0.732875	-1.54484	0.0495543
A_32_P23096	-1.18257	0.357658	-1.06551	0.847954	-2.04008	0.0277418
A_24_P48898	-1.08092	0.357585	-1.23358	0.0705874	-1.61219	0.00235392
A_24_P538459	-1.0957	0.357411	-1.08611	0.6035	-1.65055	0.00990136
A_24_P12149	-1.09772	0.357338	-1.62707	0.00760144	-1.40259	0.0243676
A_32_P57717	-1.12304	0.357264	-1.14001	0.460437	-2.01058	0.00446127
A_23_P58854	-1.14993	0.357264	-1.5694	0.0632983	1.13555	0.571689
A_32_P129862	1.13514	0.35723	-1.34956	0.144791	-1.59194	0.0381208
A_23_P129717	-1.12947	0.357006	-1.08119	0.688783	-1.95499	0.00544275
A_23_P80832	1.11233	0.356802	-1.56282	0.0175097	-2.9611	0.000321831
A_32_P163805	-1.1302	0.356433	-1.1219	0.576913	-1.74416	0.0194408
A_24_P466102	1.06199	0.354935	-1.12529	0.208928	2.01652	0.00027404
A_23_P89249	1.12076	0.354109	-1.22468	0.0638672	1.76106	0.00613381
A_23_P29939	1.08591	0.354008	1.24935	0.048282	1.50417	0.000614107
A_32_P116271	1.05785	0.353679	1.01488	0.88013	-4.80239	1.78567e-05
A_24_P323628	1.13636	0.353577	1.46378	0.0795857	1.81798	0.0164156
A_23_P165007	-1.09698	0.353261	-1.30317	0.0679422	-1.56327	0.00623595
A_32_P104334	1.12403	0.352842	-1.15451	0.434888	1.74824	0.0134037
A_23_P131924	1.17143	0.35274	1.20949	0.443262	2.01969	0.012512
A_23_P82002	-1.06805	0.352615	-1.12343	0.223838	-1.65787	0.00130533
A_24_P39639	1.0859	0.352324	-1.10186	0.345756	-1.56106	0.00321687
A_24_P843335	1.22037	0.352324	-1.89485	0.072775	-1.17042	0.612627
A_23_P215883	1.08869	0.352088	1.12266	0.387943	1.97243	0.00131062
A_32_P174303	1.11052	0.351899	-1.14097	0.434417	1.50218	0.0302603
A_23_P345175	1.12882	0.351899	1.20135	0.347255	1.51791	0.0474926
A_32_P54442	1.1599	0.351334	-1.03152	0.917235	2.07276	0.0140845
A_24_P345336	1.17603	0.351194	1.48184	0.143444	1.77737	0.0488296
A_24_P81691	1.14602	0.350212	1.63439	0.0397377	1.23235	0.333181
A_24_P114551	-1.21006	0.349676	-1.37362	0.295277	-3.355	0.00406543
A_24_P296274	-1.13396	0.34898	-1.78971	0.00712905	-2.54189	0.00079887
A_23_P52207	-1.08841	0.348687	-1.29017	0.0688684	1.57518	0.00760974
A_24_P102293	-1.13161	0.348687	1.56367	0.039087	1.31115	0.171883
A_24_P303127	1.13557	0.348631	-1.75604	0.0273384	1.13882	0.511578
A_23_P384825	-1.22683	0.34861	-1.32564	0.373937	-2.42404	0.0150291
A_32_P100610	-1.10084	0.347895	-1.06763	0.66941	-1.65426	0.00606527
A_23_P147801	1.07277	0.347847	1.03309	0.75967	1.64728	0.00108814
A_23_P333038	-1.18225	0.347684	-1.1808	0.541685	-2.22388	0.0134616
A_23_P152548	-1.16903	0.347543	-1.64256	0.0452637	-1.39269	0.118571
A_23_P254522	-1.11407	0.347531	-1.44375	0.0583903	-1.69079	0.0147848
A_24_P166645	1.13777	0.347294	1.1117	0.627807	1.71013	0.0265455
A_23_P66011	1.14038	0.346947	1.0744	0.759722	1.66175	0.0298544
A_23_P17053	1.0924	0.346626	1.08335	0.566616	1.97629	0.00144816
A_24_P37355	-1.1446	0.34647	-1.1933	0.377046	-3.08685	0.000969366
A_24_P387437	-1.10082	0.345931	-1.2392	0.116969	-3.18147	0.000145947
A_32_P53538	-1.05534	0.345451	-1.05578	0.407884	1.63659	0.000288763
A_23_P300087	1.11848	0.344787	1.0694	0.720417	1.50163	0.0326062
A_23_P321473	1.19208	0.344645	-1.23006	0.469835	2.06246	0.0279412
A_23_P218569	-1.13869	0.344549	-1.50451	0.0591703	-2.23562	0.00433818
A_24_P250964	1.09779	0.344274	1.03132	0.870659	1.53819	0.0163904
A_24_P914549	-1.32005	0.343959	-1.52422	0.33725	-4.28084	0.00973159
A_24_P105564	1.12538	0.343878	-1.3828	0.0855338	-1.80622	0.00894596
A_32_P134090	-1.15731	0.343334	-1.03629	0.897764	-1.62223	0.0546741
A_24_P143324	-1.05154	0.34327	-1.06572	0.334682	1.67577	0.000209955
A_23_P52266	1.09059	0.34327	1.25328	0.0828652	-1.73173	0.00273265
A_23_P118815	-1.12655	0.342558	1.16287	0.279235	-2.90361	0.0224239
A_24_P274270	-1.116	0.342544	1.14188	0.425661	-2.91666	0.000541946
A_23_P68868	1.10574	0.342517	1.46522	0.0265799	2.49053	0.00067971
A_24_P930276	-1.08121	0.342238	1.57787	0.0071206	1.9868	0.000869231
A_32_P33294	1.05345	0.34218	1.2249	0.0187225	1.94218	7.76388e-05
A_24_P755169	1.20806	0.342094	1.19909	0.568676	1.91632	0.0495441
A_24_P117942	1.10864	0.341415	-1.07707	0.646038	1.94416	0.00278704
A_24_P307714	-1.1379	0.339506	-1.17541	0.348176	-2.80639	0.000751744
A_23_P250813	1.06902	0.339423	1.25437	0.133392	-1.55175	0.0307553
A_23_P59481	1.11832	0.339222	1.03422	0.862178	-1.76596	0.00466906
A_24_P649436	1.11543	0.339101	1.20464	0.263546	1.75925	0.00833821
A_24_P118721	-1.1327	0.339005	-1.24951	0.220311	-3.17158	0.000594311
A_23_P429184	1.15885	0.337613	-1.0612	0.819536	1.99869	0.0138018
A_24_P583330	1.10841	0.337054	-1.21835	0.224232	1.79251	0.0055649
A_23_P407096	1.12786	0.336774	-1.18524	0.373431	-1.67684	0.0213443
A_23_P14716	1.13521	0.336531	1.44338	0.0766612	1.92836	0.00872207
A_23_P169470	1.1799	0.335891	1.29038	0.0607833	1.84236	0.031047
A_24_P118247	1.06199	0.335356	-1.52361	0.00188345	-1.28422	0.0100094
A_32_P44385	1.12359	0.335071	1.20805	0.271187	2.36155	0.00156826
A_24_P94319	-1.06526	0.335002	-1.59573	0.00182965	1.1874	0.0589128
A_24_P307443	1.12805	0.334612	1.33677	0.116464	2.07283	0.00416978
A_24_P176374	-1.08639	0.334196	-1.27579	0.0611284	-2.94662	0.000129955
A_23_P93247	-1.13801	0.334148	-1.54681	0.0498387	-1.01907	0.93096
A_23_P153320	-1.1057	0.334086	2.16489	0.000404172	3.52436	2.9878e-05
A_23_P160869	-1.22017	0.333677	-1.39786	0.274907	-1.68609	0.0953053
A_24_P58549	1.11404	0.333677	1.21672	0.233676	1.96534	0.00343815
A_24_P97257	1.15165	0.333561	1.53983	0.0675217	1.50552	0.0817307
A_24_P285179	1.08876	0.333358	1.51786	0.0120053	1.2625	0.0953339
A_24_P82032	1.07862	0.333093	1.0156	0.921206	1.60193	0.00451675
A_24_P393756	-1.21002	0.333004	-2.63836	0.00813852	-5.03612	0.000730328
A_23_P409449	1.16354	0.33178	1.4881	0.101136	1.5664	0.0704299
A_23_P107283	1.17848	0.331716	1.03995	0.903652	1.75526	0.0458069
A_23_P151595	-1.32734	0.33163	-1.43438	0.399894	-2.22833	0.0725553
A_23_P82859	-1.17149	0.330994	-1.23671	0.379516	1.67337	0.0553712
A_24_P487766	-1.07636	0.330735	-1.06564	0.596217	-1.58446	0.00359328
A_32_P464568	1.09852	0.330735	1.5655	0.0125546	1.67718	0.00556357
A_32_P27636	1.14087	0.330545	1.62843	0.0307248	1.17181	0.423771
A_24_P179816	1.16143	0.330211	1.26141	0.31154	1.58865	0.0616004
A_32_P25204	-1.17881	0.329528	-1.2088	0.466262	-2.13117	0.0155147
A_23_P99320	-1.0764	0.328818	-1.06972	0.469367	-1.52172	0.00220569
A_24_P63827	-1.16853	0.328184	-1.07637	0.780405	-1.58453	0.0659651
A_24_P398950	-1.08522	0.327749	-1.05993	0.620042	-1.61664	0.00229742
A_23_P218918	-1.1474	0.327246	-1.3052	0.031629	-2.61287	0.00156759
A_23_P48807	-1.12574	0.327166	-1.25161	0.229805	-1.85861	0.00924194
A_23_P79518	-1.07137	0.327166	-1.15797	0.1135	-1.65703	0.0139983
A_24_P319942	-1.2382	0.327077	-1.33829	0.375084	-1.83514	0.0862623
A_23_P212649	-1.13706	0.327054	1.32452	0.146414	1.55155	0.0396765
A_23_P69491	-1.06969	0.327054	1.35901	0.070306	-1.51804	0.00299968
A_32_P28078	1.14755	0.32477	1.95602	0.00862398	1.71167	0.0201492
A_24_P256674	1.13315	0.324155	1.61619	0.0309713	1.2621	0.234874
A_23_P420417	-1.15817	0.324084	-1.33122	0.170061	-1.92407	0.0107973
A_23_P129614	1.18233	0.323588	-1.01698	0.960412	2.01387	0.022309
A_32_P30891	-1.17085	0.323588	-1.06987	0.811079	-4.02375	0.000775357
A_24_P238499	-1.07176	0.323148	-1.23614	0.0384429	1.81915	0.000413896
A_23_P209176	-1.21624	0.322204	1.13981	0.664846	1.74502	0.0697143
A_23_P256223	1.15226	0.321944	1.13316	0.585122	1.62942	0.0438195
A_32_P116881	-1.05181	0.321603	-1.00975	0.917235	-1.7355	0.00025875
A_24_P934401	1.14704	0.320869	1.3878	0.124905	1.5292	0.0620451
A_23_P105562	-1.23631	0.32084	-1.91399	0.00308925	-3.06371	0.000212463
A_24_P911420	-1.14793	0.320498	1.28891	0.217664	1.78692	0.0197892
A_23_P402908	-1.05939	0.320498	1.14355	0.10716	1.85375	0.000190087
A_24_P230869	-1.13569	0.320397	-1.17926	0.373431	-1.57589	0.0336153
A_23_P254612	-1.10467	0.320397	1.30594	0.0856814	1.98185	0.0025118
A_32_P112623	-1.08288	0.320121	-1.25945	0.0699335	-1.53485	0.00665876
A_32_P32722	-1.26446	0.320059	-1.28291	0.4573	-2.74245	0.0146083
A_23_P14876	1.13226	0.320059	-1.79964	0.0153077	1.27485	0.17336
A_23_P60499	-1.16538	0.319253	-1.37905	0.134691	-1.53251	0.0620956
A_23_P434900	1.13589	0.319004	1.16893	0.413748	1.61441	0.0249752
A_23_P402899	-1.05725	0.318434	1.27942	0.00805212	-1.73363	0.000208045
A_23_P147098	1.0989	0.317849	-1.15514	0.314914	1.6439	0.00763826
A_24_P280933	-1.20832	0.317716	-1.33462	0.276903	-1.98263	0.028595
A_23_P103361	-1.16315	0.317455	1.36367	0.0738822	-1.81414	0.0140245
A_24_P160969	1.16199	0.316315	1.30439	0.244268	1.9658	0.0157701
A_23_P87653	-1.06036	0.3161	1.04485	0.559762	-1.50715	0.00083309
A_23_P117694	-1.10364	0.315836	-1.23114	0.170922	1.81428	0.0042309
A_24_P344961	1.15683	0.315153	1.50205	0.0812652	1.80733	0.0235804
A_32_P725970	1.07061	0.314572	-1.01703	0.875131	1.83641	0.000334027
A_23_P101950	-1.21513	0.314155	1.07409	0.832688	1.66263	0.0970868
A_24_P41811	1.17531	0.314155	1.61356	0.068016	1.47607	0.129173
A_32_P216809	-1.08061	0.313941	-1.13978	0.224232	-1.52384	0.0030165
[truncated: 4,016 more rows]

## Sheet: 24hFDR001
ID	FC24	FDR24						**FDR < 1%
A_23_P217554	-1.31547	0.00998744
A_23_P152873	-1.46137	0.00995236
A_24_P110601	-1.41869	0.00995236
A_24_P116571	1.4237	0.00995236
A_23_P145657	1.54544	0.00990884
A_23_P29939	1.21339	0.0098935
A_32_P92101	-1.40221	0.0098457
A_23_P115021	-1.34478	0.00978617
A_23_P118038	1.20776	0.00973646
A_24_P818005	1.55733	0.00972197
A_24_P809786	-1.23126	0.00972179
A_32_P158496	1.27401	0.00972179
A_24_P108301	-1.35061	0.00972122
A_32_P160025	1.18249	0.00972122
A_24_P301629	1.27982	0.00972122
A_23_P129382	1.35101	0.00972122
A_24_P153803	-1.28364	0.00957937
A_23_P16197	-1.66715	0.00953119
A_24_P153880	-1.59433	0.00953119
A_24_P37665	-1.30916	0.00953119
A_24_P246278	-1.27019	0.00953112
A_23_P136986	-1.45236	0.00952707
A_24_P288612	1.29042	0.00952707
A_23_P166400	-1.43942	0.00950939
A_32_P94521	1.26743	0.00950939
A_23_P142606	1.31419	0.00945996
A_23_P370162	-1.34107	0.0094502
A_23_P146294	-1.49739	0.00944452
A_32_P25357	1.24497	0.00939671
A_23_P396804	-1.17708	0.0093626
A_24_P131880	-1.94858	0.00932034
A_24_P67096	-1.22679	0.00930237
A_23_P59167	1.38253	0.00927736
A_23_P160920	1.71945	0.00927736
A_24_P272917	-1.3035	0.00927632
A_23_P165608	-1.22869	0.00927338
A_24_P375962	-1.20404	0.00927338
A_24_P723655	1.28444	0.00927338
A_32_P137883	1.36641	0.00927338
A_32_P168853	1.40561	0.00927338
A_23_P66635	1.7074	0.00927338
A_32_P159073	1.52725	0.00925956
A_23_P86133	-1.23196	0.00925935
A_23_P208812	-1.39309	0.00924632
A_24_P203284	-1.2553	0.00924039
A_24_P388622	-1.30811	0.00924035
A_24_P588235	1.30365	0.00920845
A_24_P204257	-1.6533	0.00920475
A_24_P392480	1.43465	0.00915586
A_32_P80523	-1.33135	0.00910666
A_23_P55802	-1.53846	0.0090814
A_32_P181603	-1.44802	0.00907057
A_23_P414855	1.34076	0.00907057
A_23_P84670	-1.29938	0.0090677
A_32_P30926	-1.76471	0.00906542
A_23_P170839	-1.2564	0.00905655
A_32_P183765	-1.24471	0.00905655
A_23_P146066	1.80691	0.00905655
A_23_P303891	-1.28753	0.0090518
A_23_P218918	-1.68342	0.00904413
A_23_P313512	-1.6185	0.00904413
A_24_P65779	-1.24128	0.00904413
A_23_P150818	1.23865	0.00904413
A_23_P201940	-1.6831	0.00901477
A_24_P226867	-1.36077	0.00901477
A_32_P196615	-1.40341	0.00900494
A_24_P712882	1.27757	0.00900494
A_23_P153301	1.2613	0.00899943
A_23_P20480	-1.30233	0.00897415
A_23_P10947	1.3814	0.00897415
A_32_P18147	-1.64024	0.00897218
A_23_P360387	-1.27093	0.00897218
A_24_P628683	-1.36857	0.00895896
A_32_P63848	-1.21668	0.00893416
A_23_P166023	-1.55907	0.00893383
A_23_P325862	-1.42462	0.00891703
A_24_P1731	1.27806	0.00890396
A_32_P157580	-1.78825	0.00884814
A_32_P64936	1.29303	0.00884055
A_23_P105833	-1.28947	0.00883903
A_23_P160809	1.51261	0.00883903
A_23_P10591	1.28383	0.00883897
A_23_P156748	1.59638	0.00883897
A_24_P213206	-1.55303	0.00880068
A_32_P92325	1.39004	0.00880068
A_23_P214727	1.23566	0.00875091
A_23_P132444	-1.37721	0.00873874
A_23_P67332	1.36389	0.00873874
A_24_P867342	-1.33635	0.00870272
A_23_P60793	1.4178	0.00870272
A_32_P161105	1.72584	0.00870272
A_32_P71352	1.24847	0.00868043
A_23_P154801	-1.58138	0.00867927
A_23_P307042	-1.35719	0.00867927
A_24_P260122	-1.24664	0.00867927
A_24_P314962	-1.24498	0.00867927
A_24_P935575	1.23884	0.00867927
A_23_P352365	-1.30604	0.00858794
A_23_P211572	1.32596	0.00849287
A_23_P202104	-1.65044	0.00846005
A_23_P426292	1.21013	0.00846005
A_32_P129894	1.1881	0.00841993
A_24_P141629	1.29391	0.00841011
A_32_P83047	-1.96682	0.00840514
A_23_P385427	-1.96923	0.00838064
A_24_P920381	1.34569	0.00836032
A_23_P306987	-1.50634	0.0083381
A_23_P22625	-1.44582	0.0083381
A_23_P133293	1.24217	0.0083381
A_24_P135862	-1.65893	0.0083305
A_24_P772147	-1.42793	0.00828843
A_23_P388170	-1.32001	0.00823918
A_24_P92411	-1.34147	0.00823531
A_23_P312179	1.57216	0.00823531
A_23_P67127	-1.51058	0.00823211
A_24_P78590	-1.40235	0.00823211
A_23_P253046	1.26391	0.00823211
A_32_P226149	-1.49539	0.00820811
A_24_P202769	-1.25182	0.00819055
A_23_P9086	1.23182	0.00819055
A_23_P376735	1.25503	0.00819055
A_23_P17438	1.52112	0.00819055
A_23_P135257	1.19278	0.00818784
A_23_P78888	-1.91064	0.00815512
A_23_P394567	-1.66994	0.00815162
A_23_P373645	-1.22071	0.00815004
A_23_P56010	-1.58393	0.0081239
A_23_P60330	1.22411	0.0081239
A_24_P343233	-1.24232	0.00806553
A_23_P25873	-1.20096	0.00806553
A_24_P153732	1.17823	0.00806553
A_23_P218215	-1.30988	0.00804884
A_23_P120776	-1.28425	0.00804884
A_24_P332953	1.49357	0.0080067
A_23_P135990	1.55758	0.0080067
A_24_P32118	-1.95202	0.00800606
A_24_P479682	-1.37648	0.00800606
A_24_P911648	-1.23101	0.00789518
A_24_P194508	-1.58049	0.00788241
A_23_P109382	-2.26017	0.00787309
A_23_P145437	-1.78755	0.00787309
A_23_P57036	-1.25685	0.00781377
A_23_P214121	1.25379	0.00779005
A_23_P134347	1.34013	0.00778723
A_24_P359117	-1.38845	0.00777996
A_24_P219266	1.50016	0.00775121
A_32_P104617	-1.32475	0.00770802
A_32_P30717	1.51415	0.00770412
A_32_P43415	-1.63742	0.0077024
A_23_P56150	-1.2544	0.0076533
A_23_P212977	-1.6724	0.0076079
A_23_P23048	-1.30424	0.00760254
A_23_P304304	-1.36515	0.00759071
A_32_P221991	-1.30538	0.00759071
A_24_P829541	1.18145	0.00759071
A_24_P17302	1.65347	0.00759071
A_24_P265135	1.72462	0.00759071
A_32_P235753	-1.56928	0.0075713
A_32_P162494	-1.26233	0.0075713
A_24_P317708	1.2841	0.00756793
A_23_P40956	-1.65207	0.00752809
A_23_P119611	-1.51415	0.00752809
A_23_P121037	-1.35776	0.00752809
A_32_P184417	1.31627	0.00752809
A_32_P94976	-1.65505	0.00749707
A_23_P132536	-1.41748	0.00748835
A_24_P325533	-1.4843	0.00748772
A_24_P923553	1.57876	0.00748772
A_23_P48513	-1.42405	0.00746156
A_24_P128354	1.52976	0.00746156
A_23_P350249	-1.41307	0.00740696
A_23_P163278	-1.22288	0.00738241
A_23_P312246	-1.50954	0.00736806
A_23_P339954	-1.27794	0.00736806
A_24_P4661	-1.29311	0.00726235
A_24_P481431	-1.23149	0.00726235
A_23_P152505	-1.46476	0.00723397
A_23_P21234	1.28691	0.00718578
A_23_P502174	1.21276	0.00716365
A_24_P242036	1.18288	0.00715394
A_23_P92860	-1.50181	0.00710676
A_24_P919168	-1.25965	0.00699454
A_23_P156209	-1.34376	0.00698646
A_24_P69274	1.20826	0.00696758
A_23_P108948	1.55041	0.00695086
A_23_P427075	-1.58596	0.00691224
A_32_P494790	-1.43793	0.00691224
A_23_P14340	-1.58123	0.0068952
A_24_P174641	-1.60355	0.00688105
A_23_P35645	-1.53995	0.00688105
A_23_P166353	1.39504	0.00685623
A_23_P163353	1.46186	0.00685623
A_23_P206484	-1.68055	0.00682279
A_24_P920333	-1.55283	0.00681575
A_24_P937084	1.26306	0.00680861
A_32_P178696	-1.86843	0.00672875
A_24_P926189	-1.49312	0.00672875
A_24_P461547	1.23142	0.00671471
A_23_P119395	-1.59569	0.00669317
A_24_P211351	-1.60209	0.00668262
A_23_P142688	-1.32891	0.00665812
A_23_P360874	1.34459	0.00665812
A_24_P810828	-1.37278	0.00659727
A_23_P214059	1.2378	0.00659727
A_23_P128067	-1.50908	0.0065953
A_23_P256279	1.81711	0.0065953
A_23_P117387	-1.50532	0.00658712
A_32_P540407	-1.81519	0.00658001
A_23_P22473	-1.7577	0.00658001
A_24_P204675	1.58858	0.00657142
A_23_P22224	1.3578	0.0065687
A_23_P138271	-1.99573	0.0065605
A_23_P104199	-1.37293	0.0065605
A_23_P43150	-2.06698	0.00655658
A_32_P123527	1.26999	0.00654968
A_23_P98183	-1.64282	0.00652606
A_24_P141688	-1.38434	0.00652606
A_23_P26154	-1.22083	0.00652606
A_23_P502142	1.25672	0.00652606
A_23_P62840	1.27148	0.00652606
A_24_P350136	1.27673	0.00651252
A_24_P110831	-1.68954	0.00646582
A_23_P81463	-1.59373	0.00646503
A_24_P929762	-1.32332	0.00646503
A_24_P699252	-1.25298	0.00646503
A_23_P41948	1.22013	0.00646503
A_32_P122468	1.52994	0.00644869
A_23_P36458	-1.90339	0.00643823
A_23_P153070	-1.4942	0.00643457
A_24_P914513	1.65856	0.00642162
A_23_P409462	-1.52212	0.00641916
A_24_P272073	1.28654	0.00641916
A_24_P843552	-1.54379	0.0064159
A_23_P120883	1.30114	0.0064159
A_23_P156852	-1.40446	0.00641104
A_23_P131111	-1.38028	0.00638415
A_23_P363203	-1.25084	0.00638415
A_23_P27247	-1.56411	0.00636623
A_23_P106016	-1.36332	0.00635832
A_24_P250922	-1.26517	0.00634948
A_32_P166031	1.4055	0.00633053
A_23_P421513	1.19822	0.00628929
A_23_P372151	1.33462	0.00627545
A_24_P920409	-1.47435	0.00627195
A_23_P50374	-1.70995	0.0062434
A_23_P419192	-1.5528	0.0062434
A_24_P756494	1.24243	0.0062434
A_23_P421638	1.26554	0.00623597
A_23_P394154	1.37928	0.00621351
A_23_P165372	1.39692	0.00621351
A_32_P221624	-1.45504	0.00621143
A_32_P217390	-1.33006	0.00621143
A_24_P25285	1.23258	0.00621143
A_24_P456723	1.35057	0.00621143
A_32_P98391	-1.5349	0.00620398
A_23_P36120	-1.68165	0.00615473
A_23_P214156	-2.52212	0.00614815
A_32_P174130	-1.34316	0.00614815
A_24_P678034	1.3089	0.00614815
A_32_P17343	-1.23073	0.00613496
A_32_P420520	-1.34923	0.00612472
A_23_P135966	-1.47997	0.00608874
A_24_P71468	-1.33238	0.00608874
A_23_P213706	-1.31287	0.00608874
A_23_P83835	-1.26627	0.00608874
A_23_P149613	-1.34852	0.0060471
A_23_P8328	1.54612	0.006045
A_32_P82515	-1.22489	0.0060374
A_24_P346644	1.65984	0.0060374
A_32_P124580	1.78389	0.0060374
A_32_P45462	-1.34797	0.00602486
A_32_P94	-1.54384	0.00598535
A_23_P7313	-1.33867	0.00597968
A_23_P358564	-1.2772	0.00595849
A_23_P36129	1.28956	0.0059425
A_32_P48466	-1.28536	0.00592057
A_23_P54736	-1.6114	0.00586305
A_24_P938597	-1.34038	0.00586305
A_23_P117580	-1.51062	0.0058585
A_23_P107247	-1.32794	0.0058585
A_24_P98251	-1.29011	0.0058585
A_24_P336759	1.18802	0.0058585
A_23_P37375	1.22616	0.0058585
A_23_P334664	1.30056	0.0058585
A_23_P93739	1.32994	0.0058585
A_24_P936911	-1.37324	0.00585656
A_24_P935243	-1.43672	0.00584766
A_23_P79416	-1.30189	0.00584766
A_23_P402000	-1.63975	0.00584687
A_23_P167093	-1.57022	0.00584687
A_24_P287974	-1.4233	0.00584687
A_24_P126892	-1.39243	0.00584687
A_24_P408206	1.22611	0.00584687
A_23_P215720	1.33376	0.00584687
A_23_P137073	1.41777	0.00584355
A_24_P548264	-1.38161	0.00583632
A_23_P57492	-1.26657	0.00583479
A_23_P392544	-1.33167	0.00583398
A_24_P503866	-1.41379	0.00578403
A_24_P360722	-1.90592	0.00574353
A_24_P263524	1.29532	0.00572685
A_32_P131940	-1.98258	0.00571613
A_32_P126928	1.2998	0.00571613
A_32_P30630	-1.38499	0.00562351
A_23_P51410	-1.58305	0.00561572
A_24_P255384	-1.57193	0.00557561
A_23_P120504	-1.43782	0.00555922
A_23_P253524	-1.31835	0.00550696
A_23_P70328	1.54171	0.00550696
A_32_P30693	-1.26197	0.00549213
A_32_P25889	-1.46164	0.00547009
A_23_P213661	-1.27715	0.00547009
A_24_P608268	1.25301	0.00541389
A_23_P103897	1.29468	0.00539276
A_24_P349728	-1.4083	0.00534373
A_24_P375819	-1.25501	0.00533853
A_24_P603453	-1.32332	0.00532238
A_23_P318348	-1.40619	0.00531783
A_24_P282363	1.51855	0.00531606
A_24_P4678	1.31167	0.00530986
A_32_P11526	1.65801	0.00530986
A_24_P298334	-1.65771	0.00528303
A_24_P83846	-1.3177	0.00528303
A_23_P151565	-1.24373	0.00528303
A_24_P244100	1.5945	0.00528303
A_24_P150149	-1.4689	0.00527616
A_23_P96432	1.29709	0.00527616
A_24_P280762	1.6161	0.00527616
A_24_P266880	-1.25927	0.00525112
A_23_P301896	1.29494	0.00525112
A_32_P427222	-1.87452	0.00524126
A_23_P407080	-1.46391	0.00522369
A_23_P215720	1.26026	0.0052226
A_23_P9362	-1.93373	0.0052184
A_24_P623768	1.54289	0.00521386
A_23_P4944	-1.3201	0.00520702
A_23_P37244	-1.48969	0.00517902
A_32_P29784	1.5404	0.00516619
A_24_P341006	-1.4754	0.00515871
A_23_P9186	1.42621	0.00515722
A_32_P14737	1.33145	0.00512305
A_23_P368691	-1.47154	0.0051096
A_23_P256735	1.44908	0.0050804
A_23_P109143	-1.33667	0.00505149
A_23_P202156	-1.39457	0.00499976
A_23_P126735	1.30703	0.00498229
A_23_P205046	-1.49485	0.00495101
A_23_P381368	1.39205	0.00495101
A_24_P127543	1.50508	0.00492876
A_23_P127446	-1.3336	0.00489896
A_32_P185718	-1.48024	0.00489215
A_24_P926507	1.42191	0.00488937
A_23_P34788	-1.56915	0.00488498
A_23_P126613	-1.63306	0.00486317
A_24_P409042	-1.63401	0.00484477
A_23_P211056	-1.44695	0.00483443
A_32_P36046	-1.27446	0.0048319
A_32_P105539	1.23928	0.00481082
A_24_P113264	-1.48309	0.00479341
A_32_P41065	-1.34827	0.00477671
A_24_P891276	-1.24156	0.00473397
A_23_P215051	1.38957	0.00473397
A_24_P278273	-1.65722	0.00472661
A_23_P45496	-2.00407	0.0047237
A_32_P229329	-1.29226	0.00470138
A_23_P48637	1.28266	0.00470138
A_23_P500614	-1.33785	0.00464796
A_32_P111362	1.29507	0.00464246
A_23_P2857	-1.59665	0.00460189
A_24_P585838	1.41253	0.00459774
A_24_P331373	1.64861	0.00459774
A_24_P497235	-1.31715	0.00457695
A_23_P343843	-1.64642	0.00455885
A_24_P408981	-1.68839	0.00453143
A_24_P926155	-1.42435	0.00453143
A_23_P169050	1.37726	0.00452645
A_23_P354341	-1.53675	0.0045179
A_23_P20970	-1.82747	0.00449362
A_24_P264004	-1.71578	0.00449362
A_32_P306678	-1.2561	0.00447575
A_23_P166716	-1.37142	0.00443988
A_24_P418044	1.30005	0.00439417
A_32_P51707	1.50549	0.00439417
A_23_P75310	-1.50071	0.00438641
A_24_P935093	1.3062	0.0043666
A_32_P216030	-1.42104	0.00436363
A_23_P92967	-1.59352	0.00435819
A_23_P157007	1.6622	0.00434999
A_32_P72927	-1.55687	0.00434835
A_23_P99452	1.33488	0.00434835
A_32_P228455	-1.5177	0.00433532
A_24_P937931	1.28335	0.00433532
A_32_P153244	-1.31849	0.0043331
A_23_P56865	1.26352	0.0043331
A_24_P710090	-2.1364	0.00432796
A_23_P105184	-1.79898	0.00431947
A_32_P187349	-1.2879	0.00431254
A_23_P157895	-1.34187	0.00430779
A_24_P93896	1.29408	0.00429166
A_24_P225518	-1.734	0.00428314
A_23_P424710	-1.32244	0.00428314
A_24_P930707	1.34248	0.00427982
A_24_P924791	1.31377	0.00426034
A_24_P815091	-1.79144	0.00424527
A_32_P129621	-1.49586	0.00424527
A_24_P65910	1.54599	0.00424527
A_23_P316172	-1.54625	0.00421919
A_32_P528311	1.43317	0.00421919
A_32_P105549	-1.34587	0.00418047
A_24_P170295	-1.36554	0.0041673
A_24_P7600	1.30273	0.0041673
A_23_P11729	-1.23758	0.00414795
A_23_P434347	-1.69496	0.00408364
A_32_P121834	-1.32797	0.00408364
A_23_P431890	-1.66378	0.00408089
A_23_P77731	-1.36757	0.00407775
A_24_P838483	1.44897	0.00406609
A_24_P99679	-1.71942	0.00405083
A_23_P415652	-1.54076	0.00405083
A_23_P201687	-1.26935	0.00405083
A_23_P396981	1.25907	0.00405083
A_32_P215318	1.38497	0.00405083
A_23_P131785	-1.22557	0.00404138
A_24_P46725	-1.30751	0.0040011
A_24_P8304	-1.67166	0.00398378
A_23_P362637	-1.42644	0.00398378
A_23_P201918	1.43881	0.00398179
A_23_P60856	-1.42819	0.00392838
A_24_P928901	1.27559	0.00390198
A_23_P134991	-1.61278	0.00385742
A_24_P944054	1.65061	0.00383011
A_23_P127879	-1.61678	0.00381807
A_32_P54289	1.4255	0.00380802
A_32_P35256	-1.50507	0.00379248
A_32_P29451	1.2873	0.00378206
A_24_P156886	-1.325	0.00377495
A_24_P149766	-1.25767	0.00375508
A_23_P383009	1.70229	0.00374576
A_23_P165984	-1.75358	0.00371269
A_24_P136029	-1.61347	0.00371229
A_32_P157228	1.54331	0.0036988
A_24_P332292	1.44341	0.00369472
A_23_P7873	1.54516	0.00367435
A_32_P23731	1.33139	0.00367237
A_24_P170544	-1.4587	0.00366429
A_24_P50759	1.25643	0.00366429
A_24_P196774	-1.43254	0.00359544
A_23_P409648	1.2844	0.00359544
A_23_P48936	1.39489	0.00359404
A_23_P62406	-1.49845	0.0035754
A_23_P373028	1.37672	0.00357122
A_32_P87769	1.39209	0.00355426
A_23_P152181	-1.72741	0.00354028
A_24_P17710	-1.36788	0.0035301
A_23_P68198	1.28256	0.0035301
A_24_P164815	1.49092	0.00352986
A_23_P208369	-1.82288	0.00347739
A_32_P139260	-1.54278	0.00344775
A_23_P212284	-1.56125	0.00344203
A_23_P74081	-1.26937	0.00344203
A_23_P94998	1.69672	0.00344203
A_23_P58579	-1.53901	0.00343369
A_32_P233091	-1.44297	0.00343369
A_23_P377629	-1.31513	0.00341659
A_23_P46045	1.37673	0.00340105
A_24_P917384	-1.30449	0.00339088
A_24_P911612	-1.59288	0.00338212
A_32_P50846	-1.45816	0.00338196
A_23_P250196	1.846	0.00338196
A_23_P342185	1.78528	0.00335443
A_23_P55099	-1.30971	0.00335375
A_23_P41395	2.10376	0.00335321
A_24_P187948	-1.52	0.00327394
A_23_P250353	1.33981	0.00325843
A_23_P395534	1.26496	0.00325026
A_32_P360193	-1.29947	0.00324058
A_23_P376870	-1.54873	0.0032114
A_23_P91019	-1.55642	0.00320482
A_23_P254801	-1.27254	0.00320482
A_23_P257895	-1.75442	0.00318596
A_24_P936809	1.3668	0.00318596
A_24_P417996	1.56597	0.00318266
A_23_P125265	1.38713	0.00315034
A_23_P349147	-1.57011	0.00314827
A_24_P50368	1.41888	0.00314707
A_32_P12169	1.33411	0.00314385
A_24_P921584	-1.45607	0.0031326
A_23_P252362	1.35616	0.00312503
A_24_P247774	-1.58566	0.00309426
A_23_P310492	-1.30613	0.00308983
A_23_P391938	-1.5815	0.00308172
A_32_P210407	-1.53339	0.00308172
A_23_P139265	-1.53829	0.00303256
A_32_P201041	-1.28502	0.00303038
A_24_P913819	-1.70286	0.0029977
A_32_P222149	-2.03609	0.00297477
A_24_P849512	1.2581	0.00297477
A_24_P759747	1.32526	0.00297477
A_24_P862886	1.58616	0.00297477
A_24_P202558	-1.42896	0.00297273
A_24_P935310	-1.60497	0.00294809
A_23_P162322	-1.44521	0.00292758
A_23_P431776	-1.30918	0.00292758
A_24_P722068	1.4066	0.00292758
A_23_P69058	1.29287	0.00291807
A_23_P63668	-1.79679	0.00288768
A_24_P101480	-1.63694	0.00288768
A_24_P16470	-1.39484	0.00288768
A_24_P193961	-1.33473	0.00288768
A_23_P329727	-1.29033	0.00288768
A_24_P364838	1.24785	0.00288768
A_23_P353005	1.30731	0.00288768
A_24_P74160	1.466	0.00288768
A_24_P261083	-1.70339	0.00287411
A_24_P290751	-1.62711	0.00287411
A_24_P398147	-1.58441	0.00286908
A_23_P2683	-2.07372	0.00286336
A_24_P185018	-1.53043	0.00285862
A_23_P375524	-1.75011	0.00284927
A_23_P201193	-1.48001	0.00284927
A_32_P170178	-1.38542	0.00284927
A_24_P398092	-1.33793	0.00284296
A_24_P48403	1.56813	0.00284296
A_32_P215100	-1.31023	0.0028363
A_24_P322474	-1.29571	0.00282682
A_23_P368101	-1.30598	0.0028033
A_23_P152858	1.50152	0.00278525
A_23_P117068	-1.53313	0.00277218
A_32_P195756	-1.53243	0.00277218
A_23_P112531	-1.49005	0.0027394
A_23_P400945	-1.80099	0.0027356
A_23_P35467	-1.37601	0.0027356
A_24_P339416	-1.32496	0.0027356
A_32_P116556	-1.2269	0.0027356
A_23_P145584	-1.68557	0.00268818
A_32_P50603	-1.60346	0.00268818
A_23_P352291	-1.37413	0.00268818
A_23_P27936	1.34872	0.00268818
A_32_P101264	1.39559	0.00268818
A_24_P306964	1.6424	0.00268818
A_32_P148672	1.70136	0.00268818
A_24_P714707	-1.87689	0.0026499
A_24_P630039	-1.57517	0.00264701
A_24_P270829	-1.29107	0.00264701
A_23_P144165	-1.54374	0.00264372
A_23_P141180	-1.82369	0.00262568
A_23_P328545	-1.56853	0.00262568
A_23_P131036	1.29395	0.00262568
A_23_P161352	1.60945	0.00262568
A_23_P61487	-1.60316	0.0025891
A_24_P457345	1.44229	0.00257955
A_32_P5666	-1.55641	0.0025723
A_23_P125042	-1.60201	0.00256019
A_23_P7074	-1.56943	0.00256019
A_24_P366535	-1.54683	0.00256019
A_32_P2452	-1.31764	0.00255004
A_23_P156807	-1.41291	0.00253446
A_23_P109254	1.3051	0.00248483
A_23_P250767	-1.61414	0.00246129
A_23_P311875	-1.4058	0.00246129
A_23_P502142	-1.35444	0.00246129
A_23_P10194	1.62639	0.00246129
A_23_P43690	-1.49597	0.00245253
A_23_P31765	-1.9005	0.0024332
A_23_P34804	-1.53626	0.0024332
A_23_P135742	-1.50949	0.0024332
A_24_P816073	-1.60887	0.00239347
A_23_P87727	-1.5873	0.00238802
A_32_P197340	1.27939	0.00238382
A_23_P1056	-1.53555	0.00237999
A_23_P49254	-1.31646	0.00236419
A_23_P49052	1.43123	0.00234807
A_23_P48295	-1.59859	0.00232573
A_24_P923629	-1.44547	0.00232422
A_24_P15388	1.98512	0.00231676
A_24_P279520	-1.49774	0.00231593
A_32_P169179	-1.33375	0.00231593
A_24_P11142	-1.36202	0.00231355
A_24_P203882	1.59283	0.00230391
A_23_P112921	-1.77433	0.00229853
A_23_P81298	-1.46796	0.00229853
A_23_P127948	-1.27745	0.00229853
A_23_P24365	1.48541	0.00229853
A_24_P256018	-1.67511	0.00229555
A_24_P723735	-1.66647	0.00229161
A_23_P305120	-1.48179	0.00229161
A_23_P218584	-1.40789	0.00229161
A_24_P482592	-1.27183	0.00229161
A_24_P365526	1.49139	0.00229161
A_24_P76546	-1.40162	0.00229099
A_24_P234822	-1.42257	0.00227516
A_23_P48513	-1.31085	0.00225535
A_24_P566916	-1.53858	0.00222599
A_23_P17269	-1.44639	0.00220538
A_32_P58361	-1.32664	0.0022008
A_32_P230537	-1.38293	0.00219311
A_23_P170761	1.32899	0.00219311
A_23_P420551	1.34485	0.00219311
A_23_P345799	-1.33224	0.00217597
A_23_P111481	-1.35564	0.00215815
A_24_P366033	-1.85788	0.00215633
A_32_P96245	1.63244	0.0021553
A_23_P130648	1.68815	0.00215083
A_23_P100092	-1.72008	0.00212997
A_23_P29851	-1.71196	0.00212997
A_24_P696133	-1.3384	0.00212747
A_23_P365081	-1.46298	0.00210277
A_24_P43391	1.62456	0.00209585
A_24_P239419	-1.62776	0.00209436
A_23_P165162	-1.81789	0.00207026
A_23_P205686	-1.80949	0.00204645
A_32_P12202	-1.61665	0.00204531
A_23_P348737	-1.52455	0.00204111
A_23_P253464	1.64417	0.00201599
A_23_P376211	-2.11539	0.00201191
A_23_P60283	-1.93857	0.00201191
A_24_P143888	1.36581	0.00198616
A_24_P917044	1.83475	0.00198616
A_32_P97506	-1.37336	0.00198166
A_23_P159476	1.84529	0.00198166
A_23_P202448	-1.63827	0.00197332
A_23_P310086	-1.33708	0.00197332
A_23_P107206	1.35091	0.00197313
A_23_P47527	-1.57643	0.00197003
A_24_P912490	-1.31658	0.00192917
A_23_P251342	-1.35493	0.00192103
A_23_P147431	-1.40298	0.00191555
A_23_P129332	1.32389	0.00191425
A_23_P370684	-1.82282	0.00190024
A_32_P69536	-1.75269	0.00190024
A_24_P273043	1.3093	0.00189932
A_23_P258972	1.499	0.00189375
A_23_P404536	-1.51573	0.00188027
A_23_P8640	1.5774	0.00187813
A_32_P183652	1.6079	0.00185027
A_23_P102192	-1.335	0.00184699
A_24_P119617	-1.93611	0.00184588
A_24_P916559	-1.89547	0.00184588
A_24_P399980	-1.58359	0.00184588
A_32_P102224	1.75611	0.00181892
A_23_P24433	-1.34642	0.00181838
A_23_P83414	1.48278	0.00181838
A_32_P444104	1.54979	0.00181838
A_24_P945165	-1.56952	0.00181602
A_23_P418015	-1.61492	0.00179553
A_24_P56281	-1.94834	0.00178506
A_23_P82795	-1.70444	0.00178506
A_24_P195785	-1.45138	0.00178506
A_23_P386356	1.55855	0.00178506
A_24_P247039	-1.53122	0.00173222
A_23_P148798	-1.34657	0.00172569
A_23_P35989	-1.3235	0.00172569
A_24_P702871	1.47813	0.00172569
A_24_P818378	-1.56741	0.00171238
A_23_P748	-2.05859	0.00171111
A_32_P93517	1.27697	0.00171111
A_32_P58699	1.53088	0.00171111
A_24_P916435	-1.75065	0.0016838
A_32_P80255	1.34367	0.00167582
A_32_P137336	1.55915	0.00167582
A_23_P20196	1.33845	0.00166092
A_23_P165201	-1.98672	0.00165544
A_24_P84668	-1.63202	0.00165544
A_23_P6433	1.46315	0.00165544
A_23_P201047	1.86376	0.0016475
A_24_P113824	-1.60616	0.00162276
A_24_P276583	1.58479	0.0016089
A_23_P99452	1.44203	0.00160593
A_23_P253982	-1.58705	0.00154219
A_24_P269327	-2.23169	0.0015308
A_23_P17606	-1.65894	0.0015308
A_24_P83455	-1.65447	0.0015308
A_23_P18871	-1.64572	0.0015308
A_23_P69329	-1.64566	0.0015308
A_32_P96933	-1.57105	0.0015308
A_32_P79763	-1.52898	0.0015308
A_23_P40926	-1.50723	0.0015308
A_32_P79610	-1.39254	0.0015308
A_24_P102080	-1.36322	0.0015308
A_24_P409390	1.3185	0.0015308
A_24_P829789	1.45705	0.0015308
A_24_P115450	-1.6448	0.00152735
A_24_P788878	-2.397	0.00152691
A_23_P159764	-1.48191	0.00152691
A_32_P177595	1.61217	0.00151009
A_23_P203498	-2.50943	0.00147945
A_24_P923789	1.53337	0.00147945
A_24_P817223	-1.61541	0.0014609
A_32_P127368	-1.55949	0.0014609
A_23_P306352	-1.53393	0.0014609
A_23_P24870	-1.48478	0.0014609
A_24_P1873	-1.38228	0.0014609
A_24_P461881	1.29552	0.0014609
A_23_P256682	-1.86828	0.00145504
A_32_P187320	1.59824	0.00145504
A_24_P252310	-1.61436	0.0014532
A_24_P681563	-1.50263	0.0014389
A_23_P49041	-1.37834	0.0014389
A_23_P87879	1.42964	0.0014389
A_23_P315571	1.38598	0.00143339
A_32_P156786	1.57136	0.00142777
A_32_P36412	1.64386	0.00142713
A_23_P46903	-1.43172	0.00141625
A_23_P327519	1.56204	0.00141247
A_23_P109442	-1.5718	0.00141126
A_23_P139050	-1.6128	0.00137852
A_32_P52785	1.56966	0.00137852
A_23_P7582	-1.57916	0.00137204
A_32_P162862	1.37578	0.00136127
A_24_P18270	-1.64938	0.00135386
A_23_P24104	-1.78819	0.00134474
A_24_P384636	1.47737	0.00134019
A_24_P333532	1.35936	0.00133918
A_23_P209389	1.37529	0.00133893
A_23_P502241	1.43214	0.00131783
A_23_P138058	-1.60472	0.0012915
A_24_P940375	1.39459	0.0012915
A_32_P200697	-1.74034	0.00127992
A_24_P873659	-1.67084	0.00127992
A_32_P211188	-1.55116	0.00127992
A_23_P215956	-1.38778	0.00127992
A_32_P190294	1.3977	0.00127992
A_24_P185909	1.51131	0.00127992
A_23_P57626	-1.557	0.0012733
A_23_P204472	1.4965	0.00127287
A_32_P229132	1.41619	0.00127276
A_24_P457912	-1.76607	0.00127056
A_23_P26367	-1.3981	0.00126516
A_23_P144911	-1.79104	0.00126062
A_23_P97749	-1.97985	0.00124244
A_32_P22622	1.6457	0.00124244
A_24_P49298	-1.58731	0.00123161
A_23_P206441	1.32701	0.00123161
A_23_P87323	1.35424	0.00122669
A_24_P222860	1.60941	0.00122174
A_32_P98732	-2.0639	0.00120486
A_24_P48187	1.35541	0.00119385
A_23_P12053	1.84353	0.00119385
A_23_P210886	-1.51745	0.00117489
A_24_P98555	-1.35007	0.00117489
A_24_P349636	1.52977	0.00117489
A_32_P128773	-1.74152	0.00117443
A_23_P379736	-1.42997	0.00117253
A_24_P399490	-1.51923	0.00116254
A_24_P163632	-1.72732	0.00113327
A_24_P87931	1.35173	0.00112283
A_23_P79703	-1.42185	0.00109774
A_24_P772061	-1.53531	0.00108218
A_24_P742954	1.64939	0.00108218
A_23_P118334	-1.581	0.00107569
A_23_P125990	-2.21224	0.00105421
A_32_P4071	-1.58436	0.00105421
A_23_P18078	-1.57029	0.00105421
A_23_P30736	-1.5422	0.00105421
A_23_P55716	-1.52983	0.00102159
A_24_P250666	-1.51234	0.00102159
A_23_P34644	1.66669	0.00102159
A_32_P56037	2.19625	0.00102159
A_23_P502470	-1.45103	0.0010126
A_24_P237117	-1.78536	0.000996892
A_23_P153586	-1.58418	0.000996892
A_32_P30320	-1.48177	0.00099479
A_23_P146526	-1.65207	0.000937473
A_32_P98496	-1.39536	0.000918238
A_23_P329271	-1.76179	0.000903876
A_23_P113716	-1.59281	0.000903876
A_23_P75741	-1.51536	0.000903876
A_23_P94009	1.79594	0.000903472
A_23_P99540	-1.38966	0.000886249
A_23_P97283	-1.57508	0.000883222
A_23_P431430	-1.44743	0.000883222
A_32_P84049	1.42123	0.000883222
A_24_P282031	-1.44893	0.00087721
A_23_P317082	-1.85806	0.000862305
A_23_P359015	-1.58255	0.000862305
A_32_P26443	-1.5562	0.000862305
A_23_P324633	-1.51528	0.000862305
A_23_P105307	-1.60037	0.000825715
A_23_P142497	1.72525	0.000824326
A_24_P83968	-1.68178	0.000821429
A_32_P4700	1.42623	0.000821429
A_24_P126246	1.64052	0.000821429
A_24_P144773	-1.5427	0.000819865
A_24_P935114	-1.43821	0.000819865
A_23_P70509	-1.57853	0.00079439
A_23_P102694	1.45045	0.000766692
A_23_P65230	1.56149	0.000766692
A_23_P212522	-2.45705	0.000765939
A_32_P136662	-1.89363	0.000757461
A_24_P109417	-1.49963	0.000749531
A_23_P167349	-1.76392	0.000747233
A_24_P943815	-1.46554	0.000717373
A_23_P30755	-1.55681	0.00071698
A_23_P153256	-1.44036	0.00071698
A_23_P403466	-1.62195	0.00071202
A_23_P314101	-1.66697	0.000698705
A_24_P188447	-1.66263	0.000698705
A_23_P91423	1.44022	0.000698705
A_24_P11640	1.47453	0.000698705
A_23_P337292	1.56859	0.000698705
A_24_P367329	1.68404	0.000698705
A_23_P144944	1.77961	0.000698705
A_23_P312837	2.0765	0.000698705
A_23_P82738	2.09283	0.000698705
A_24_P20753	2.47014	0.000695132
A_23_P34888	-2.41923	0.000693385
A_24_P367645	-1.63314	0.000693385
A_23_P378588	-1.4666	0.000693385
A_23_P48339	-1.43712	0.000693385
A_32_P76122	1.35864	0.000693385
A_23_P7087	1.37328	0.000693385
A_32_P709998	-1.64684	0.000688712
A_24_P920904	1.51603	0.000688712
A_23_P132684	-1.55376	0.000682291
A_32_P46899	-1.57595	0.000668761
A_24_P918792	-1.63688	0.000664453
A_23_P98282	-1.63063	0.000660102
A_32_P35575	-1.60099	0.000659463
A_24_P579780	-1.64361	0.000658853
A_23_P38618	1.6105	0.000649011
A_24_P83799	-1.87021	0.000636933
A_24_P870921	-1.85789	0.000633724
A_23_P126393	-1.39098	0.000633724
A_23_P128609	-1.63046	0.000620587
A_24_P25679	-2.29046	0.000619145
A_23_P123060	-1.53959	0.000619145
A_23_P55376	1.82863	0.000619145
A_32_P159192	-2.14225	0.000614704
A_23_P314666	-1.58288	0.000614704
A_24_P917886	-1.5213	0.000614704
A_23_P133216	-1.42108	0.000614704
A_24_P776036	2.01796	0.000614704
A_23_P119562	1.45937	0.000601048
A_24_P306925	-1.60716	0.000597614
A_32_P496893	1.64553	0.000597614
A_23_P426511	1.93411	0.000597614
A_23_P202316	-1.73446	0.000587603
A_24_P74932	1.51796	0.00057764
A_23_P204810	-2.60544	0.000568644
A_23_P39294	-1.68367	0.000564157
A_23_P77174	-1.65913	0.000564157
A_24_P890995	-1.59042	0.000564157
A_24_P665504	-1.52867	0.000564157
A_32_P49654	-1.50133	0.000564157
A_23_P250196	-1.46066	0.000564157
A_24_P555791	-1.38263	0.000564157
A_23_P19313	2.11265	0.000564157
A_24_P58647	-1.69175	0.000558757
A_23_P200443	-1.75397	0.000554253
A_23_P63896	-1.68375	0.000553621
A_23_P259521	-1.61574	0.000530834
A_24_P786025	-1.43298	0.000530834
A_24_P923142	1.55328	0.000530834
A_24_P144377	1.70919	0.000530834
A_32_P228290	-1.53557	0.000527142
A_23_P157196	2.25753	0.000527142
A_23_P113716	-1.92953	0.000512734
A_23_P218131	-1.77769	0.000512734
A_32_P26330	-1.67615	0.000511992
A_23_P106024	2.24777	0.000510328
A_23_P377882	1.38658	0.000486728
A_23_P111321	-2.00251	0.000479817
A_23_P96209	-1.5046	0.000479817
A_24_P418044	-1.5349	0.000471985
A_24_P385000	1.53647	0.000468991
A_23_P16866	-1.51441	0.000466957
A_32_P152882	-1.72817	0.00046679
A_24_P913227	-1.67962	0.00046679
A_32_P67769	-1.79162	0.000462606
A_23_P103522	-1.77269	0.000462606
A_23_P398172	-1.60285	0.000462606
A_23_P140716	-1.54721	0.000462606
A_24_P115424	-1.52003	0.000462606
A_23_P375549	1.73969	0.000462606
A_24_P114496	2.04858	0.000462606
A_23_P319466	-2.0559	0.000462334
A_24_P111044	-1.83062	0.000462334
A_23_P400515	-1.7024	0.000462334
A_23_P214821	-1.64496	0.000462334
A_23_P79221	-1.64187	0.000462334
A_23_P106056	1.81173	0.000462334
A_32_P627	2.20013	0.000462334
A_32_P230192	2.26508	0.000462334
A_23_P105562	-2.22796	0.000457254
A_32_P84333	-2.05636	0.000457254
A_23_P114075	-1.89369	0.000457254
A_24_P239578	-1.8169	0.000457254
A_23_P96568	-1.54211	0.000457254
A_23_P11362	1.48274	0.000457254
A_32_P70483	1.60381	0.000457254
A_32_P235796	2.19824	0.000457254
A_23_P65254	-1.91744	0.000451469
A_32_P210572	-1.89103	0.000451469
A_24_P363609	-1.83969	0.000451469
A_32_P38436	-1.68479	0.000451469
A_23_P255194	-1.64114	0.000451469
A_24_P290833	-1.58195	0.000451469
A_32_P23145	1.53594	0.000451469
A_23_P37441	1.71985	0.000451469
A_32_P201579	1.94364	0.000451469
A_24_P295452	-1.924	0.000447748
A_32_P105465	-1.81344	0.000446773
A_24_P937582	-2.07585	0.000443997
A_32_P133005	-1.829	0.000443997
A_23_P344568	-1.75046	0.000426301
A_32_P175934	-1.48284	0.000426301
A_32_P155588	-1.86851	0.000422031
A_24_P478726	-1.75512	0.000411017
A_23_P411277	-1.76683	0.000377962
A_24_P510081	2.2411	0.000350119
A_23_P216915	-2.39586	0.000342676
A_23_P171409	-2.11006	0.000342676
A_24_P173754	-1.62121	0.000342676
A_32_P177522	-1.60374	0.000342676
A_24_P246229	-1.55505	0.000342676
A_24_P144487	1.79398	0.000342676
A_24_P539226	-2.17749	0.000330184
A_24_P925709	-1.59644	0.000330184
A_23_P42802	-1.69609	0.000321551
A_23_P376096	-1.66663	0.000321551
A_24_P33705	1.59196	0.000321551
A_24_P393582	1.76681	0.000315331
A_24_P281101	-1.63002	0.000307238
A_23_P80040	1.54141	0.000301033
A_23_P140907	2.31146	0.000301033
A_23_P212983	-2.12159	0.000294133
A_23_P133606	-2.00649	0.000294133
A_23_P67648	-1.8903	0.000294133
A_23_P116173	-1.72151	0.000281385
A_32_P224157	-1.71636	0.000281385
A_24_P935585	-1.70048	0.000281385
A_23_P393144	-1.59792	0.000271045
A_24_P315769	-1.85587	0.000256997
A_23_P400078	-1.77433	0.000256997
A_24_P42624	-1.72961	0.000256997
A_23_P323924	1.7357	0.000256997
A_23_P99693	1.7518	0.000256997
A_32_P187817	2.02076	0.000256997
A_24_P352445	2.6126	0.000256997
A_23_P121253	-2.07732	0.000241192
A_32_P780623	-2.05763	0.000241192
A_32_P136982	-1.91632	0.000241192
A_24_P916195	-1.83988	0.000241192
A_24_P876352	-1.85033	0.000220277
A_24_P849319	-1.80376	0.000218907
A_23_P212554	1.94407	0.000218907
A_24_P333630	2.27579	0.000218907
A_23_P254594	2.75447	0.000218907
A_24_P943180	-2.15859	0.000210714
A_23_P63829	-1.80983	0.00020889
A_23_P24104	-1.6198	0.000205557
A_23_P208579	-1.59368	0.000205557
A_24_P189739	-2.4405	0.00020081
A_32_P27878	-1.92092	0.00020081
A_23_P318300	-1.90312	0.00020081
A_23_P103424	-1.78431	0.00020081
A_24_P496839	-1.73125	0.00020081
A_24_P265346	-1.68772	0.00020081
A_23_P86975	2.26249	0.00020081
A_24_P407439	2.44675	0.00020081
A_23_P153320	2.20472	0.000199633
A_23_P2973	-2.27011	0.000194406
A_32_P5976	-1.94554	0.000149238
A_32_P192586	-2.00954	0.000141488
A_23_P93623	-1.70753	0.000141488
A_24_P325107	2.4543	0.000141488
A_23_P203983	-1.89936	0.000136335
A_32_P103162	-2.20591	0.000111551
A_24_P916141	-2.01971	9.34e-05
A_23_P30122	-1.90205	9.34e-05
A_23_P375147	-2.37243	7.6e-05
A_23_P369447	-2.13217	5.58e-05
A_23_P44586	-2.91459	4.26e-05
A_32_P43349	-2.56874	3.92e-05
A_24_P167825	-2.56475	3.92e-05
A_32_P144133	-2.29465	3.92e-05
A_23_P114210	-2.22785	3.92e-05
A_23_P43317	-2.20397	3.92e-05
A_32_P84933	2.52032	3.92e-05

## Sheet: 48hFDR001
ID	FC48	FDR48							**1 percent FDR
A_23_P108948	-3.25488	0.000785885
A_32_P170621	-3.18188	0.00610636
A_24_P393756	-2.63836	0.00813852
A_23_P204810	-2.62044	0.00256894
A_24_P849319	-2.45422	0.00030273
A_24_P943180	-2.41045	0.000695942
A_32_P16747	-2.40157	0.00143141
A_23_P47527	-2.37095	0.00081775
A_23_P394323	-2.36771	0.000440367
A_24_P8130	-2.36524	0.00652453
A_23_P145480	-2.32703	0.00506821
A_23_P129903	-2.32263	0.00426461
A_32_P131940	-2.31707	0.00835975
A_23_P118042	-2.31276	0.00650047
A_23_P205273	-2.31078	0.00030273
A_23_P201628	-2.30581	0.00371751
A_32_P134772	-2.30414	0.00345191
A_23_P357966	-2.29088	0.00643037
A_23_P107911	-2.28739	0.00757638
A_23_P35330	-2.28322	0.00290488
A_23_P37275	-2.27018	0.00410979
A_23_P37244	-2.26587	0.000944867
A_32_P119616	-2.24539	0.00304203
A_23_P30122	-2.23216	0.00383778
A_23_P30122	-2.23216	0.00383778
A_23_P30122	-2.23216	0.00383778
A_23_P139265	-2.22491	0.000872203
A_32_P61061	-2.22147	0.00030273
A_23_P11713	-2.21037	0.0085963
A_23_P115021	-2.20891	0.00120661
A_23_P124022	-2.20499	0.00836166
A_23_P69329	-2.1987	0.00120661
A_24_P408981	-2.18151	0.00345191
A_23_P87727	-2.17694	0.00134321
A_23_P97749	-2.15833	0.00447277
A_24_P248167	-2.15658	0.00757638
A_24_P99679	-2.14638	0.00521383
A_24_P99679	-2.14638	0.00521383
A_24_P99679	-2.14638	0.00521383
A_24_P99679	-2.14638	0.00521383
A_24_P99679	-2.14638	0.00521383
A_24_P99679	-2.14638	0.00521383
A_23_P8363	-2.09222	0.00240962
A_32_P735636	-2.08748	0.00122537
A_23_P156687	-2.08628	0.00342874
A_24_P792389	-2.08407	0.00506821
A_32_P235753	-2.08211	0.00436993
A_24_P144881	-2.06847	0.00150834
A_24_P79054	-2.04676	0.00968012
A_23_P393144	-2.02738	0.000440367
A_24_P273114	-2.02255	0.000897531
A_23_P90311	-2.02246	0.0056044
A_23_P407551	-2.01932	0.00241435
A_23_P86550	-2.0185	0.0066731
A_23_P313938	-2.01425	0.000695942
A_32_P69536	-2.01157	0.00373108
A_23_P70213	-2.01011	0.0026055
A_23_P70213	-2.01011	0.0026055
A_23_P70213	-2.01011	0.0026055
A_23_P137573	-2.0043	0.00184698
A_32_P30630	-1.99508	0.00168551
A_23_P97161	-1.98527	0.000785885
A_23_P141389	-1.96899	0.00415343
A_23_P161595	-1.96723	0.00879915
A_23_P391443	-1.96701	0.00129009
A_23_P141180	-1.96516	0.00618998
A_24_P83799	-1.96336	0.00220727
A_23_P365081	-1.94001	0.00139886
A_32_P136982	-1.9324	0.000904418
A_23_P144726	-1.92924	0.00283233
A_24_P352608	-1.92754	0.0095108
A_23_P319466	-1.92374	0.00282037
A_23_P154801	-1.92107	0.00948186
A_23_P105562	-1.91399	0.00308925
A_23_P105562	-1.91399	0.00308925
A_23_P105562	-1.91399	0.00308925
A_23_P105562	-1.91399	0.00308925
A_23_P105562	-1.91399	0.00308925
A_23_P105562	-1.91399	0.00308925
A_32_P228438	-1.91092	0.00851917
A_32_P221624	-1.90546	0.00253307
A_32_P192586	-1.90409	0.000827201
A_23_P114689	-1.90297	0.00263556
A_23_P114649	-1.90215	0.0095108
A_24_P264004	-1.89646	0.00937886
A_23_P167444	-1.89538	0.000872203
A_32_P103162	-1.89407	0.000890456
A_23_P54736	-1.8932	0.00827308
A_23_P157628	-1.88899	0.00672838
A_32_P92101	-1.88145	0.0027475
A_24_P363609	-1.8803	0.00141405
A_24_P11384	-1.87727	0.00157639
A_23_P375524	-1.86771	0.0081085
A_23_P144911	-1.86647	0.00411238
A_23_P774	-1.86008	0.00349947
A_24_P457912	-1.84505	0.00447277
A_24_P39919	-1.84149	0.00290497
A_23_P369447	-1.83389	0.000695942
A_32_P198584	-1.83338	0.00282037
A_23_P61487	-1.82485	0.00412071
A_23_P317082	-1.81699	0.00521383
A_24_P457345	-1.81601	0.00230022
A_23_P27381	-1.81501	0.00650047
A_32_P128773	-1.79907	0.00281837
A_23_P374294	-1.79705	0.000695942
A_24_P296274	-1.78971	0.00712905
A_24_P332292	-1.78575	0.00188345
A_23_P356021	-1.7849	0.00846988
A_23_P54144	-1.78405	0.00156676
A_23_P352648	-1.77971	0.00670888
A_32_P5666	-1.77781	0.00310734
A_32_P229699	-1.77117	0.00308631
A_32_P50603	-1.75804	0.00444677
A_24_P295452	-1.7562	0.00339131
A_23_P346309	-1.75239	0.00457792
A_23_P315364	-1.75161	0.00469675
A_32_P98496	-1.75135	0.000831643
A_23_P369994	-1.74038	0.00496531
A_24_P920409	-1.73804	0.00710073
A_23_P134650	-1.73545	0.0069368
A_32_P494790	-1.73198	0.00684712
A_23_P137751	-1.72783	0.00879915
A_24_P279520	-1.72445	0.00371886
A_32_P200697	-1.723	0.00357613
A_23_P106174	-1.72107	0.00665837
A_32_P177522	-1.71894	0.000890456
A_23_P83347	-1.71594	0.00182965
A_23_P256131	-1.711	0.00100094
A_23_P152873	-1.70255	0.00650073
A_23_P8497	-1.70098	0.00305787
A_24_P243278	-1.69963	0.00250144
A_23_P204472	-1.69736	0.00321975
A_23_P204472	-1.69736	0.00321975
A_23_P204472	-1.69736	0.00321975
A_32_P211188	-1.69518	0.00207115
A_23_P168531	-1.6924	0.00832949
A_23_P74887	-1.69232	0.0068933
A_24_P642328	-1.69082	0.00204897
A_24_P272254	-1.68942	0.00913249
A_32_P187851	-1.6876	0.0067051
A_23_P218215	-1.68673	0.00249647
A_32_P210407	-1.68445	0.0035589
A_23_P417753	-1.68343	0.00345191
A_24_P589001	-1.68185	0.00913249
A_32_P158355	-1.67873	0.00245617
A_32_P56037	-1.67635	0.00756554
A_32_P437227	-1.67346	0.00129009
A_24_P84668	-1.67249	0.00252472
A_32_P210572	-1.6712	0.00282037
A_23_P163955	-1.66925	0.00744568
A_32_P151269	-1.6683	0.00966497
A_23_P167711	-1.66804	0.00406145
A_24_P926189	-1.66264	0.00818551
A_24_P633283	-1.65954	0.000831643
A_32_P224157	-1.65766	0.00116081
A_24_P357933	-1.65667	0.000695942
A_32_P228124	-1.65505	0.00937886
A_32_P170178	-1.64858	0.00198073
A_24_P195544	-1.64573	0.00873359
A_23_P149613	-1.64555	0.00291477
A_23_P85682	-1.64131	0.00784821
A_23_P329727	-1.64027	0.00137906
A_23_P94216	-1.63662	0.00152372
A_23_P30024	-1.63492	0.00717345
A_23_P30024	-1.63492	0.00717345
A_23_P30024	-1.63492	0.00717345
A_23_P30024	-1.63492	0.00717345
A_23_P30024	-1.63492	0.00717345
A_24_P937931	-1.63221	0.00182838
A_23_P114075	-1.63035	0.00220727
A_24_P364236	-1.62738	0.00245617
A_24_P12149	-1.62707	0.00760144
A_32_P232523	-1.62692	0.00349947
A_24_P196774	-1.62648	0.0044136
A_23_P212284	-1.625	0.00632756
A_23_P46903	-1.62235	0.000695942
A_23_P67072	-1.62174	0.00148504
A_32_P13565	-1.62164	0.00240962
A_32_P138260	-1.6172	0.00115374
A_24_P182182	-1.61605	0.00258055
A_32_P215714	-1.61271	0.00818322
A_23_P363149	-1.612	0.00746526
A_23_P390157	-1.61171	0.000831643
A_23_P253524	-1.60888	0.00193697
A_23_P253524	-1.60888	0.00193697
A_24_P542375	-1.60768	0.0074551
A_24_P306994	-1.60655	0.00217154
A_23_P82588	-1.60046	0.00210599
A_24_P867342	-1.60038	0.00797786
A_23_P412186	-1.59961	0.00139886
A_24_P15083	-1.59596	0.0097319
A_24_P94319	-1.59573	0.00182965
A_24_P892542	-1.59244	0.00477798
A_32_P176344	-1.584	0.00525827
A_24_P263036	-1.58148	0.00380102
A_32_P176790	-1.58047	0.00342874
A_23_P321160	-1.57985	0.00830497
A_24_P608330	-1.57549	0.00201612
A_24_P903460	-1.57196	0.00768198
A_24_P239578	-1.56946	0.00642071
A_23_P41541	-1.56933	0.00705777
A_23_P123133	-1.56925	0.00112132
A_23_P134764	-1.56869	0.00532564
A_24_P579482	-1.56389	0.0032307
A_24_P918792	-1.56283	0.00460159
A_23_P392544	-1.5626	0.00354918
A_23_P125265	-1.56177	0.00383746
A_23_P117238	-1.56161	0.005163
A_24_P925709	-1.56122	0.00180365
A_23_P156209	-1.56069	0.00502846
A_24_P348173	-1.55907	0.00129009
A_23_P105423	-1.55765	0.00614584
A_24_P523530	-1.55627	0.00304203
A_32_P21916	-1.55541	0.00813852
A_23_P114862	-1.5545	0.0066731
A_24_P481411	-1.55363	0.00760228
A_23_P360387	-1.55204	0.00461592
A_32_P184518	-1.55089	0.00323839
A_24_P665504	-1.54529	0.00155624
A_23_P210872	-1.54217	0.00696412
A_23_P396804	-1.53923	0.00139886
A_24_P218074	-1.53868	0.00308689
A_23_P388780	-1.53727	0.00230022
A_24_P940952	-1.53396	0.0018342
A_23_P69663	-1.53373	0.004386
A_23_P58337	-1.52626	0.00846988
A_24_P630875	-1.52618	0.00466298
A_23_P423695	-1.52594	0.00283233
A_24_P556883	-1.52589	0.00558586
A_24_P817223	-1.52477	0.00934779
A_24_P118247	-1.52361	0.00188345
A_32_P90709	-1.51276	0.00457535
A_24_P938597	-1.51176	0.00760228
A_32_P104617	-1.50935	0.00847513
A_32_P60076	-1.50876	0.00153703
A_23_P376088	-1.50804	0.00851821
A_23_P128609	-1.50726	0.00407468
A_24_P82848	-1.50487	0.00682853
A_24_P917384	-1.50427	0.00223122
A_23_P86133	-1.50039	0.0035589
A_23_P30736	-1.49524	0.00354918
A_23_P379736	-1.49516	0.00263556
A_24_P206305	-1.4939	0.00889402
A_32_P133005	-1.49255	0.00875511
A_24_P385205	-1.48718	0.00850756
A_24_P282031	-1.48117	0.00115374
A_24_P490704	-1.47801	0.00296891
A_24_P818378	-1.47757	0.00844256
A_24_P53778	-1.47602	0.00296009
A_23_P216610	-1.47544	0.0096262
A_23_P13907	-1.47493	0.00533112
A_23_P13907	-1.47493	0.00533112
A_23_P13907	-1.47493	0.00533112
A_23_P43690	-1.47189	0.00805212
A_24_P290833	-1.45923	0.00407009
A_23_P132863	-1.4551	0.00236079
A_23_P24870	-1.45237	0.00659829
A_23_P24870	-1.45237	0.00659829
A_23_P24870	-1.45237	0.00659829
A_23_P24870	-1.45237	0.00659829
A_23_P363163	-1.44268	0.00351578
A_23_P79703	-1.44167	0.00308631
A_32_P217390	-1.44073	0.00746526
A_24_P153803	-1.43938	0.00785032
A_23_P140716	-1.43732	0.00282037
A_23_P208579	-1.43707	0.00249647
A_24_P265346	-1.4311	0.00236079
A_23_P206212	-1.43029	0.00474423
A_23_P206212	-1.43029	0.00474423
A_23_P206212	-1.43029	0.00474423
A_23_P206212	-1.43029	0.00474423
A_23_P206212	-1.43029	0.00474423
A_23_P44586	-1.43007	0.00355497
A_23_P424710	-1.42521	0.0068933
A_23_P137865	-1.42323	0.00543577
A_23_P55716	-1.41909	0.0067051
A_23_P303891	-1.41316	0.0095108
A_24_P58647	-1.40856	0.00383778
A_23_P115563	-1.40828	0.00459359
A_23_P37311	-1.40817	0.0071206
A_32_P40375	-1.40757	0.00211001
A_23_P340312	-1.40243	0.00696412
A_23_P48513	-1.39989	0.00447277
A_23_P48513	-1.39989	0.00447277
A_23_P48513	-1.39989	0.00447277
A_23_P417100	-1.39884	0.00804104
A_23_P148798	-1.39776	0.00390386
A_23_P148798	-1.39776	0.00390386
A_23_P148798	-1.39776	0.00390386
A_23_P148798	-1.39776	0.00390386
A_23_P148798	-1.39776	0.00390386
A_23_P148798	-1.39776	0.00390386
A_32_P49654	-1.39337	0.00672838
A_23_P368101	-1.38773	0.00249647
A_23_P311875	-1.38613	0.0060045
A_32_P79610	-1.38345	0.00663013
A_24_P52801	-1.37676	0.00349947
A_24_P314962	-1.37531	0.00594813
A_23_P141092	-1.37435	0.00558586
A_23_P79221	-1.36555	0.00924531
A_24_P93896	-1.35876	0.0085019
A_24_P786025	-1.35842	0.00447277
A_24_P141629	-1.35097	0.00983481
A_24_P891276	-1.34605	0.0067792
A_32_P171903	-1.34241	0.00496531
A_23_P63829	-1.34226	0.00459359
A_24_P699252	-1.34102	0.00811359
A_24_P247978	-1.33176	0.00469675
A_23_P38630	-1.3289	0.00349947
A_23_P89431	-1.32723	0.00406145
A_23_P89431	-1.32723	0.00406145
A_23_P89431	-1.32723	0.00406145
A_24_P347411	-1.32456	0.00471729
A_23_P33759	-1.32452	0.00973142
A_24_P920826	-1.32297	0.00478794
A_23_P133216	-1.31018	0.00616071
A_32_P187349	-1.31005	0.00906579
A_24_P943815	-1.30863	0.0097319
A_32_P2452	-1.29725	0.0077993
A_23_P25873	-1.28834	0.00726117
A_23_P25873	-1.28834	0.00726117
A_23_P25873	-1.28834	0.00726117
A_32_P9737	-1.27933	0.00620126
A_32_P27878	-1.27398	0.00585409
A_24_P375819	-1.27329	0.00797786
A_23_P502142	1.23822	0.00804238
A_23_P502142	1.23822	0.00804238
A_23_P502142	1.23822	0.00804238
A_23_P502142	1.23822	0.00804238
A_23_P502142	1.23822	0.00804238
A_23_P502142	1.23822	0.00804238
A_23_P502142	1.23822	0.00804238
A_24_P304439	1.24488	0.00830497
A_23_P37503	1.25689	0.00656769
A_23_P68198	1.25727	0.00961209
A_23_P329573	1.26449	0.00615807
A_23_P329573	1.26449	0.00615807
A_23_P329573	1.26449	0.00615807
A_23_P329573	1.26449	0.00615807
A_23_P329573	1.26449	0.00615807
A_23_P329573	1.26449	0.00615807
A_23_P81522	1.26672	0.00506821
A_23_P15045	1.26898	0.0097319
A_24_P149766	1.27735	0.0095108
A_23_P402899	1.27942	0.00805212
A_24_P25285	1.28501	0.0074551
A_23_P80040	1.28533	0.00965282
A_24_P919995	1.28691	0.00937886
A_32_P70483	1.28902	0.00757638
A_23_P396981	1.29037	0.00804238
A_23_P55099	1.29849	0.00447277
A_23_P55099	1.29849	0.00447277
A_23_P55099	1.29849	0.00447277
A_23_P55099	1.29849	0.00447277
A_24_P601576	1.29883	0.00805212
A_24_P10214	1.31167	0.00396472
A_23_P56865	1.31884	0.0068933
A_23_P56865	1.31884	0.0068933
A_23_P56865	1.31884	0.0068933
A_23_P56865	1.31884	0.0068933
A_23_P56865	1.31884	0.0068933
A_32_P160025	1.31947	0.00616071
A_23_P23765	1.32212	0.00498473
A_23_P23765	1.32212	0.00498473
A_23_P23765	1.32212	0.00498473
A_23_P145024	1.32641	0.0071206
A_23_P145024	1.32641	0.0071206
A_23_P145024	1.32641	0.0071206
A_23_P145024	1.32641	0.0071206
A_23_P214821	1.3297	0.00850756
A_23_P214821	1.3297	0.00850756
A_23_P214821	1.3297	0.00850756
A_23_P214821	1.3297	0.00850756
A_23_P365267	1.33199	0.00659829
A_23_P81811	1.33366	0.00746526
A_23_P415411	1.34412	0.00457792
A_23_P167276	1.3453	0.00656769
A_23_P107206	1.34553	0.00687194
A_23_P107206	1.34553	0.00687194
A_23_P46627	1.3513	0.00615963
A_23_P398275	1.35397	0.00935351
A_32_P128368	1.35439	0.00447277
A_23_P93169	1.3635	0.00949175
A_23_P313278	1.36352	0.00672838
A_24_P588235	1.36521	0.00549283
A_24_P829541	1.37207	0.00349947
A_23_P103897	1.37218	0.00850756
A_32_P229132	1.37243	0.00535227
A_23_P119562	1.37514	0.00420825
A_23_P131036	1.37569	0.00425948
A_23_P211835	1.376	0.0059972
A_24_P221475	1.37751	0.00496981
A_32_P140823	1.38102	0.00349947
A_23_P99452	1.38195	0.00805212
A_23_P99452	1.38195	0.00805212
A_23_P99452	1.38195	0.00805212
A_23_P35883	1.38995	0.00311754
A_24_P330385	1.39137	0.00496981
A_23_P324633	1.39812	0.0049122
A_32_P201579	1.39883	0.00958059
A_24_P587443	1.39999	0.0097319
A_32_P22191	1.40238	0.00304203
A_23_P377909	1.40319	0.00592114
A_32_P444104	1.40689	0.0066731
A_24_P87931	1.41098	0.00345191
A_24_P69267	1.41322	0.0048652
A_23_P121423	1.41685	0.00524927
A_24_P315769	1.42215	0.00383329
A_23_P77430	1.42406	0.00589166
A_24_P324630	1.42417	0.00412394
A_23_P150818	1.42461	0.00148504
A_23_P45811	1.42724	0.00314034
A_23_P314666	1.42741	0.00311754
A_24_P310667	1.42783	0.00999575
A_24_P185909	1.43159	0.00428267
A_23_P209389	1.43268	0.00336565
A_23_P209389	1.43268	0.00336565
A_23_P209389	1.43268	0.00336565
A_23_P209389	1.43268	0.00336565
A_23_P209389	1.43268	0.00336565
A_23_P209389	1.43268	0.00336565
A_24_P476215	1.43932	0.00243982
A_24_P456723	1.44038	0.00907119
A_32_P183987	1.44084	0.00494841
A_24_P241792	1.44233	0.00804238
A_24_P925062	1.44332	0.00937886
A_32_P110780	1.44386	0.0050164
A_24_P247039	1.44416	0.00805212
A_23_P362261	1.44731	0.00193697
A_23_P203773	1.44928	0.00499588
A_24_P19268	1.45015	0.00830497
A_32_P84049	1.45149	0.00354918
A_23_P146339	1.45613	0.00295023
A_23_P46045	1.45657	0.00746526
A_23_P151653	1.45856	0.00737854
A_24_P381136	1.4628	0.00697015
A_24_P100664	1.46365	0.00906941
A_23_P259955	1.464	0.00506821
A_23_P10591	1.46454	0.00703282
A_23_P146576	1.46518	0.0097933
A_23_P205355	1.46548	0.00436993
A_23_P133284	1.46698	0.00650073
A_23_P133284	1.46698	0.00650073
A_23_P28886	1.46887	0.0059972
A_23_P28886	1.46887	0.0059972
A_23_P28886	1.46887	0.0059972
A_23_P28886	1.46887	0.0059972
A_23_P28886	1.46887	0.0059972
A_23_P28886	1.46887	0.0059972
A_32_P156373	1.47276	0.00618613
A_24_P205268	1.47687	0.00232487
A_24_P349616	1.47718	0.00349947
A_32_P5976	1.47957	0.00230022
A_32_P127339	1.47971	0.00271039
A_32_P29451	1.48036	0.00230022
A_23_P2355	1.48062	0.00168551
A_32_P162494	1.48331	0.00139886
A_23_P11372	1.48409	0.00357753
A_23_P11372	1.48409	0.00357753
A_23_P11372	1.48409	0.00357753
A_24_P39484	1.48874	0.00396472
A_23_P102694	1.48882	0.00263556
A_23_P105873	1.4926	0.00184698
A_23_P70148	1.49297	0.0013602
A_23_P151565	1.49391	0.00210501
A_23_P339954	1.49601	0.00295023
A_23_P79993	1.49682	0.00429265
A_32_P80255	1.49718	0.00246911
A_24_P50368	1.49755	0.00784821
A_23_P75260	1.49887	0.00651318
A_23_P47980	1.49922	0.0020465
A_32_P105549	1.4994	0.00201533
A_23_P71867	1.49964	0.00304203
A_24_P784203	1.50048	0.00256894
A_23_P33015	1.50135	0.00763628
A_24_P152491	1.50208	0.0093526
A_23_P62840	1.5025	0.00353476
A_32_P121226	1.50314	0.0062476
A_24_P170717	1.50343	0.00470293
A_24_P345993	1.50418	0.00236079
A_24_P50759	1.50576	0.00197762
A_24_P50759	1.50576	0.00197762
A_24_P50759	1.50576	0.00197762
A_24_P50759	1.50576	0.00197762
A_24_P50759	1.50576	0.00197762
A_23_P205057	1.50631	0.00298324
A_32_P210691	1.50699	0.000890456
A_24_P759747	1.50803	0.00224817
A_23_P427217	1.5081	0.00297465
A_23_P7087	1.50889	0.00120661
A_24_P930707	1.51013	0.00496981
A_23_P69188	1.51207	0.00251793
A_32_P187817	1.51268	0.00359763
A_23_P153360	1.51275	0.00813852
A_24_P25234	1.51437	0.000851347
A_23_P88630	1.51536	0.0068933
A_23_P314101	1.51575	0.00343159
A_32_P219657	1.51681	0.00724391
A_23_P334664	1.517	0.00406145
A_32_P83784	1.51935	0.000919558
A_24_P418044	1.51959	0.00240165
A_24_P418044	1.51959	0.00240165
A_24_P418044	1.51959	0.00240165
A_24_P418044	1.51959	0.00240165
A_24_P170733	1.52099	0.00768198
A_23_P95594	1.52288	0.00304203
A_23_P407601	1.52317	0.0013602
A_32_P347617	1.52343	0.00837366
A_23_P84063	1.52389	0.00161546
A_23_P92983	1.52403	0.00139886
A_23_P116168	1.52425	0.00361943
A_23_P409648	1.52496	0.00278941
A_23_P132619	1.52527	0.00937886
A_23_P377197	1.5253	0.00304507
A_24_P164815	1.52608	0.0095108
A_24_P333532	1.52629	0.00182965
A_32_P39384	1.52668	0.00122526
A_23_P41948	1.52692	0.00207115
A_23_P41948	1.52692	0.00207115
A_23_P41948	1.52692	0.00207115
A_23_P212617	1.52744	0.00994732
A_23_P89727	1.52822	0.00248478
A_23_P149812	1.52846	0.00876274
A_24_P452326	1.53039	0.00184698
A_32_P497742	1.5307	0.0097319
A_32_P4318	1.53188	0.00354918
A_24_P74932	1.53202	0.00308631
A_24_P126873	1.53319	0.0059972
A_23_P37441	1.53349	0.00308337
A_23_P37441	1.53349	0.00308337
A_23_P37441	1.53349	0.00308337
A_23_P37441	1.53349	0.00308337
A_23_P37441	1.53349	0.00308337
A_23_P150950	1.53402	0.00608374
A_24_P777694	1.53445	0.0022595
A_32_P33765	1.53549	0.00457792
A_23_P308763	1.53558	0.000872203
A_24_P132813	1.5358	0.00501435
A_23_P57577	1.53605	0.00147154
A_23_P36129	1.53612	0.0032307
A_32_P115475	1.53615	0.00144234
A_23_P157879	1.53713	0.00496531
A_23_P138885	1.5374	0.00130319
A_24_P252043	1.53745	0.00219646
A_23_P70849	1.53973	0.00378712
A_23_P70849	1.53973	0.00378712
A_23_P70849	1.53973	0.00378712
A_23_P70849	1.53973	0.00378712
A_24_P341853	1.54	0.00659829
A_24_P342670	1.54299	0.0097624
A_24_P919727	1.54303	0.00154496
A_23_P60016	1.54304	0.00150834
A_23_P376704	1.54329	0.00242262
A_23_P200685	1.5435	0.00308631
A_23_P252023	1.54368	0.00793013
A_23_P209360	1.54381	0.00281837
A_32_P162862	1.54494	0.00154496
A_24_P147765	1.54547	0.00604024
A_23_P387552	1.54584	0.00501036
A_32_P95894	1.54657	0.00455432
A_23_P129313	1.54665	0.000847976
A_23_P77731	1.54781	0.00236497
A_23_P337292	1.54871	0.00380489
A_24_P264063	1.55069	0.00126264
A_24_P139993	1.55187	0.00240165
A_23_P16006	1.5522	0.00601248
A_23_P165372	1.55318	0.00783648
A_23_P59210	1.55393	0.00459359
A_23_P59210	1.55393	0.00459359
A_23_P59210	1.55393	0.00459359
A_23_P59210	1.55393	0.00459359
A_32_P222474	1.55418	0.00744153
A_24_P678418	1.55443	0.000831643
A_23_P104372	1.55444	0.00924335
A_24_P302038	1.55495	0.0071206
A_23_P137073	1.55559	0.00961209
A_23_P23048	1.55607	0.00585409
A_23_P209987	1.55746	0.00518154
A_24_P376516	1.55875	0.00604345
A_23_P402733	1.55922	0.00521383
A_23_P65963	1.55988	0.00281837
A_24_P370702	1.56165	0.00835975
A_23_P106761	1.56291	0.00865113
A_24_P219418	1.56381	0.00344475
A_24_P945188	1.5647	0.00849514
A_23_P395418	1.56499	0.00269975
A_23_P22013	1.565	0.00230022
A_24_P24256	1.56568	0.00342874
A_23_P387943	1.56647	0.00139757
A_23_P151915	1.56717	0.00650047
A_23_P94103	1.56792	0.00703282
A_23_P110253	1.57067	0.00271039
A_23_P110253	1.57067	0.00271039
A_23_P110253	1.57067	0.00271039
A_23_P110253	1.57067	0.00271039
A_23_P110253	1.57067	0.00271039
A_23_P110253	1.57067	0.00271039
A_24_P289884	1.57212	0.00803871
A_32_P162820	1.57213	0.00635043
A_24_P371303	1.57292	0.00654816
A_23_P502609	1.5735	0.00484872
A_23_P165136	1.57424	0.0012593
A_23_P23171	1.57451	0.00793013
A_24_P256155	1.57501	0.000831643
A_23_P139207	1.57549	0.00179255
A_23_P380954	1.57632	0.00343627
A_23_P74081	1.57703	0.0069368
A_23_P74081	1.57703	0.0069368
A_23_P74081	1.57703	0.0069368
A_23_P74081	1.57703	0.0069368
A_23_P74081	1.57703	0.0069368
A_23_P74081	1.57703	0.0069368
A_23_P74081	1.57703	0.0069368
A_32_P129950	1.57719	0.00116961
A_24_P930276	1.57787	0.0071206
A_32_P420520	1.57878	0.00396472
A_32_P128391	1.5801	0.00184698
A_32_P34920	1.58024	0.00907119
A_32_P213624	1.58031	0.00760228
A_23_P404016	1.58095	0.00776635
A_24_P129588	1.58127	0.00499588
A_23_P373645	1.58204	0.00107252
A_23_P154188	1.58306	0.00574038
A_23_P422766	1.58357	0.00760228
A_23_P82394	1.58362	0.000695942
A_23_P123164	1.58716	0.00804238
A_24_P333802	1.5882	0.00882967
A_32_P25273	1.58834	0.00584566
A_23_P44235	1.5905	0.00704338
A_24_P337867	1.59216	0.00134321
A_23_P113762	1.59246	0.0071206
A_32_P17484	1.595	0.000812519
A_23_P369485	1.59521	0.00141405
A_23_P104318	1.59541	0.00242262
A_23_P31810	1.59554	0.00615963
A_23_P120941	1.59571	0.00154496
A_24_P288612	1.59733	0.00379527
A_24_P177964	1.59874	0.00126868
A_24_P79855	1.59924	0.00882967
A_24_P256817	1.59968	0.00224817
A_23_P411825	1.60106	0.00387119
A_23_P203994	1.60371	0.00219646
A_23_P87839	1.60494	0.00351578
A_32_P44987	1.60516	0.00400983
A_23_P166353	1.60533	0.00614584
A_23_P256735	1.60582	0.0074594
A_32_P117232	1.60705	0.00746526
A_32_P113472	1.60793	0.00140666
A_32_P29118	1.60882	0.00768198
A_23_P73526	1.60915	0.00197762
A_32_P164246	1.61029	0.0076516
A_24_P943193	1.61033	0.0032307
A_24_P504621	1.61145	0.0068933
A_23_P133293	1.61152	0.00154433
A_32_P196287	1.61396	0.00406145
A_32_P98348	1.61511	0.00687194
A_32_P93517	1.61565	0.000872203
A_24_P607306	1.61726	0.00879915
A_32_P182388	1.61776	0.000831643
A_32_P191860	1.61943	0.00155845
A_24_P136551	1.61974	0.00333204
A_24_P324479	1.6198	0.00447277
A_24_P592591	1.62314	0.0022041
A_24_P273635	1.62447	0.00236079
A_24_P268893	1.62579	0.0046378
A_24_P68358	1.62626	0.000872203
A_24_P280664	1.62643	0.00585409
A_23_P394972	1.62693	0.0050164
A_23_P206612	1.62806	0.000872203
A_24_P565540	1.63041	0.00983481
A_23_P15639	1.63046	0.00996187
A_24_P572303	1.63067	0.00406145
A_32_P38500	1.63151	0.000831643
A_24_P255233	1.63155	0.00230022
A_23_P90925	1.63287	0.00555726
A_24_P64407	1.63373	0.00193697
A_23_P48637	1.63411	0.0018331
A_23_P48637	1.63411	0.0018331
A_23_P48637	1.63411	0.0018331
A_23_P48637	1.63411	0.0018331
A_23_P126735	1.63477	0.00223122
A_23_P126735	1.63477	0.00223122
A_23_P126735	1.63477	0.00223122
A_23_P126735	1.63477	0.00223122
A_23_P126735	1.63477	0.00223122
A_23_P126735	1.63477	0.00223122
A_24_P940375	1.63488	0.00139757
A_32_P157471	1.63566	0.00277576
A_23_P365060	1.63694	0.00126264
A_23_P67648	1.6378	0.00220727
A_23_P140698	1.6383	0.00713322
A_32_P23731	1.64222	0.00152372
A_23_P133868	1.64233	0.00090221
A_24_P44845	1.64401	0.000872203
A_23_P144980	1.6442	0.000872203
A_23_P422026	1.64456	0.000872203
A_23_P163567	1.64487	0.00124965
A_23_P134026	1.64581	0.00447277
A_23_P100220	1.6465	0.0051208
A_32_P41173	1.64823	0.00157639
A_23_P91423	1.6489	0.000872203
A_23_P204947	1.65055	0.00343627
A_23_P204947	1.65055	0.00343627
A_23_P204947	1.65055	0.00343627
A_23_P204947	1.65055	0.00343627
A_32_P71352	1.65071	0.00140368
A_24_P153732	1.65099	0.00081775
A_24_P17909	1.65125	0.00830497
A_24_P84220	1.65189	0.00349947
A_23_P323783	1.65196	0.00813852
A_32_P23145	1.6553	0.000831643
A_24_P126902	1.65579	0.00304203
A_23_P32785	1.657	0.00470832
A_24_P121956	1.657	0.000944867
A_23_P501193	1.6575	0.00490157
A_24_P457304	1.65821	0.0053564
A_23_P18903	1.6595	0.00430772
A_23_P393627	1.65956	0.00236079
A_24_P179244	1.66067	0.0077915
A_23_P341275	1.66088	0.000872203
A_24_P67988	1.66384	0.00081775
A_23_P89665	1.66577	0.00246362
A_23_P163059	1.6662	0.00375153
A_24_P586450	1.66652	0.00150691
A_24_P462428	1.66759	0.00283233
A_23_P58407	1.66826	0.00406145
A_32_P72927	1.66837	0.00459359
A_24_P109432	1.66941	0.00263062
A_32_P122468	1.67128	0.00935351
A_23_P121106	1.6729	0.00387119
A_24_P79529	1.673	0.00554343
A_32_P196837	1.67428	0.000872203
A_23_P20196	1.67677	0.000831643
A_32_P19752	1.67788	0.00763657
A_23_P393531	1.67906	0.00246911
A_24_P739785	1.68121	0.000695942
A_23_P414855	1.68129	0.00506821
A_32_P105110	1.68204	0.00236079
A_23_P134419	1.68284	0.00240165
A_23_P211543	1.68319	0.00696412
A_24_P281009	1.68349	0.00400983
A_24_P737492	1.68454	0.00242262
A_24_P179516	1.6848	0.00406145
A_24_P543460	1.68528	0.00562352
A_23_P166716	1.68715	0.00961209
A_23_P166716	1.68715	0.00961209
A_23_P166716	1.68715	0.00961209
A_23_P166716	1.68715	0.00961209
A_23_P166716	1.68715	0.00961209
A_24_P931974	1.68733	0.00469144
A_23_P202199	1.68772	0.00415343
A_23_P2322	1.6883	0.000872203
A_23_P49052	1.6884	0.00226708
A_32_P1516	1.68859	0.00457792
A_23_P111361	1.68978	0.00776635
A_23_P97473	1.69245	0.004386
A_24_P98251	1.69284	0.00135459
A_24_P273132	1.69612	0.00149942
A_24_P103434	1.69664	0.000831643
A_24_P1873	1.69743	0.00154496
A_24_P263524	1.69996	0.00103981
A_32_P4700	1.70024	0.000812519
A_32_P129894	1.70245	0.000812519
A_32_P143700	1.70268	0.00643037
A_24_P699896	1.70294	0.0081085
A_23_P109254	1.70397	0.000695942
A_24_P931736	1.70538	0.00361943
A_24_P271014	1.70862	0.0044743
A_24_P180680	1.70917	0.00472335
A_23_P256855	1.7095	0.00756554
A_32_P95265	1.70954	0.00635043
A_23_P129332	1.70982	0.000831643
A_24_P929441	1.71761	0.00236079
A_24_P418357	1.72093	0.00447277
A_32_P527371	1.72284	0.00182965
A_24_P860662	1.72439	0.00285754
A_32_P155043	1.72505	0.000890456
A_23_P31858	1.72545	0.000872203
A_32_P207151	1.72583	0.00161546
A_24_P321525	1.72914	0.00768198
A_23_P391396	1.72989	0.000872203
A_24_P324606	1.73019	0.00406145
A_23_P22854	1.73137	0.00354918
A_24_P31235	1.73328	0.00418381
A_23_P252155	1.73572	0.00219297
A_24_P886065	1.73637	0.00514279
A_24_P917044	1.73849	0.00310946
A_23_P421513	1.74013	0.000695942
A_32_P76122	1.74069	0.000831643
A_24_P19810	1.74284	0.00585409
A_24_P170584	1.74388	0.00274195
A_23_P56304	1.74562	0.00236079
A_24_P32215	1.74563	0.000873008
A_23_P21644	1.74955	0.00496531
A_23_P250963	1.75083	0.00139886
A_24_P838483	1.75309	0.00251618
A_23_P66306	1.75503	0.00081775
A_23_P215037	1.75912	0.00572178
A_24_P239538	1.76383	0.00496981
A_23_P101193	1.76835	0.00236079
A_23_P59828	1.77035	0.00804238
A_24_P19752	1.77069	0.00339131
A_32_P71456	1.77458	0.00505726
A_32_P26330	1.77632	0.000785885
A_23_P422204	1.77745	0.000872203
A_23_P102517	1.77755	0.0027411
A_32_P41065	1.7782	0.000872203
A_23_P64102	1.77993	0.00139886
A_23_P148609	1.78367	0.00820426
A_24_P10137	1.78814	0.00249002
A_24_P48187	1.7891	0.000695942
A_32_P166031	1.79304	0.00354918
A_23_P112652	1.79326	0.0032307
A_24_P272917	1.79534	0.00140368
A_24_P935093	1.79634	0.000872203
A_24_P923215	1.79734	0.0066731
A_32_P231880	1.81063	0.00959633
A_23_P214798	1.82053	0.00126829
A_23_P69606	1.82276	0.00316763
A_24_P394510	1.82568	0.000925769
A_24_P935585	1.82792	0.000695942
A_24_P247106	1.83039	0.00656769
A_23_P426511	1.83181	0.00201533
A_23_P169576	1.83549	0.00269518
A_23_P38519	1.83695	0.000831643
A_23_P38519	1.83695	0.000831643
A_23_P38519	1.83695	0.000831643
A_23_P38519	1.83695	0.000831643
A_24_P179175	1.84147	0.00447277
A_23_P359214	1.84252	0.00579069
A_32_P215474	1.84502	0.00268013
A_23_P210886	1.84558	0.00184698
A_23_P210886	1.84558	0.00184698
A_23_P210886	1.84558	0.00184698
A_23_P210886	1.84558	0.00184698
A_24_P936911	1.84901	0.00116961
A_24_P115511	1.84959	0.00207115
A_32_P45615	1.85059	0.00457792
A_24_P257759	1.85108	0.00188345
A_24_P247774	1.85154	0.0066731
A_24_P236799	1.85386	0.000695942
A_23_P101351	1.86109	0.000872203
A_23_P203475	1.86161	0.00139886
A_24_P119617	1.86224	0.00672838
A_32_P110917	1.86373	0.00139886
A_23_P113716	1.86476	0.00132464
A_23_P113716	1.86476	0.00132464
A_23_P113716	1.86476	0.00132464
A_23_P113716	1.86476	0.00132464
A_23_P113716	1.86476	0.00132464
A_24_P68783	1.86705	0.00935351
A_24_P191884	1.86868	0.000695942
A_23_P205697	1.86909	0.00139757
A_24_P734297	1.87092	0.0069368
A_23_P32500	1.87532	0.000872203
A_32_P190294	1.87626	0.000695942
A_23_P101281	1.87747	0.00256894
A_23_P258190	1.87914	0.0053564
A_24_P128068	1.90222	0.00258055
A_24_P273043	1.90633	0.000695942
A_24_P914722	1.9095	0.00719532
A_24_P471121	1.91093	0.00906941
A_23_P36611	1.91659	0.00277576
A_24_P216014	1.92239	0.00259796
A_24_P714140	1.9273	0.0097319
A_32_P100974	1.93713	0.00436993
A_23_P150198	1.93749	0.00303372
A_24_P333420	1.93924	0.00875916
A_24_P349636	1.94125	0.000872203
A_23_P5300	1.94875	0.000695942
A_23_P5300	1.94875	0.000695942
A_23_P5300	1.94875	0.000695942
A_23_P5300	1.94875	0.000695942
A_23_P8452	1.95356	0.000831643
A_23_P134991	1.95525	0.00345191
A_32_P28078	1.95602	0.00862398
A_24_P168456	1.95652	0.00349947
A_23_P330611	1.9611	0.000812519
A_23_P368154	1.96523	0.000575772
A_32_P157504	1.96986	0.0030872
A_23_P69437	1.97139	0.00223122
A_32_P230192	1.98085	0.00141405
A_23_P108743	1.98327	0.00144234
A_24_P879729	1.99524	0.0066731
A_32_P235796	1.99575	0.00100094
A_32_P627	2.00197	0.00120661
A_24_P555791	2.00623	0.000440367
A_23_P318348	2.01469	0.00126264
A_24_P510081	2.01779	0.000872203
A_23_P370588	2.02752	0.00134321
A_24_P201552	2.0325	0.00475064
A_23_P88817	2.03695	0.000440367
A_24_P134568	2.0394	0.00918889
A_23_P106024	2.04411	0.0013602
A_23_P19313	2.04746	0.00134321
A_23_P19313	2.04746	0.00134321
A_24_P341938	2.04818	0.000695942
A_24_P202581	2.04958	0.000785885
A_23_P209625	2.05098	0.00862398
A_23_P204801	2.05459	0.000872203
A_24_P923142	2.06012	0.000695942
A_23_P140907	2.06219	0.000831643
A_24_P212409	2.06372	0.00184698
A_32_P540407	2.07053	0.00703282
A_32_P179351	2.07233	0.000581875
A_24_P407439	2.07355	0.000695942
A_23_P150147	2.07385	0.000404172
A_23_P85371	2.07459	0.00254292
A_24_P333630	2.07618	0.000695942
A_23_P371107	2.07676	0.00490157
A_23_P86072	2.08562	0.00290488
A_32_P111524	2.08801	0.0013602
A_23_P64247	2.08844	0.00856942
A_23_P86975	2.09151	0.000440367
A_23_P15647	2.09491	0.00457792
A_24_P358554	2.09851	0.00223122
A_32_P225092	2.1067	0.0071206
A_32_P182760	2.10812	0.000812519
A_23_P60306	2.12134	0.00303372
A_23_P60306	2.12134	0.00303372
A_23_P60306	2.12134	0.00303372
A_23_P60306	2.12134	0.00303372
A_23_P60306	2.12134	0.00303372
A_24_P65910	2.12374	0.00220727
A_23_P85585	2.12423	0.00659829
A_24_P276583	2.12735	0.00111697
A_23_P325122	2.13002	0.00524927
A_32_P141664	2.14987	0.000695942
A_24_P84508	2.15758	0.00343627
A_23_P153320	2.16489	0.000404172
A_23_P153320	2.16489	0.000404172
A_23_P153320	2.16489	0.000404172
A_23_P153320	2.16489	0.000404172
A_23_P404134	2.175	0.00615963
A_23_P140342	2.20704	0.00386227
A_23_P212475	2.23289	0.00811359
A_23_P161386	2.25289	0.00201356
A_32_P217561	2.27925	0.000890456
A_24_P930415	2.33623	0.00666824
A_32_P82265	2.34251	0.00137906
A_32_P35575	2.36389	0.000695942
A_24_P641130	2.38189	0.00030273
A_24_P417189	2.39818	0.00378687
A_24_P928798	2.41943	0.000872203
A_23_P50008	2.4223	0.00850549
A_23_P120845	2.43358	0.000785885
A_32_P103508	2.46501	0.000851347
A_24_P139761	2.47816	0.000709687
A_23_P63798	2.48237	0.00507938
A_24_P306614	2.59489	0.000695942
A_23_P11936	2.66256	0.00576421
A_24_P184305	2.73872	0.00030273
A_23_P254626	2.79473	0.00696412
A_32_P35031	2.8638	0.00182965
A_23_P87752	4.4407	0.00168551

## Sheet: 72hFDR001
ID	FC72	FDR72
A_23_P47885	-8.53971	0.000277389
A_23_P77562	-5.31819	0.00031614
A_32_P73991	-5.26151	0.000754205
A_24_P264031	-5.18046	0.00111457
A_23_P201342	-5.09951	0.00326733
A_23_P317082	-5.09551	6.71217e-05
A_24_P393756	-5.03612	0.000730328
A_23_P22473	-5.01007	0.000341939
A_32_P59262	-4.9366	0.00618914
A_23_P60259	-4.92203	0.00446898
A_24_P26114	-4.88884	0.00162745
A_23_P322367	-4.87849	0.00122888
A_23_P54373	-4.84479	0.00488389
A_23_P155931	-4.82024	0.0034126
A_24_P92367	-4.81261	0.00435687
A_23_P160025	-4.80892	0.00346965
A_24_P58647	-4.8038	1.78567e-05
A_32_P116271	-4.80239	1.78567e-05
A_23_P35099	-4.79471	0.000633334
A_23_P51136	-4.72994	0.00577725
A_24_P43826	-4.71396	0.00165367
A_24_P329424	-4.55704	0.000207202
A_23_P394567	-4.44548	0.000320921
A_23_P92213	-4.43045	0.000310558
A_23_P369447	-4.42325	1.78567e-05
A_23_P126689	-4.40008	0.00211449
A_24_P308144	-4.35406	0.000234721
A_24_P914549	-4.28084	0.00973159
A_23_P103631	-4.27494	0.00358627
A_24_P189739	-4.17087	5.43603e-05
A_23_P149938	-4.15705	0.00299402
A_24_P401686	-4.15659	0.00197049
A_24_P8130	-4.13832	0.000586832
A_23_P375147	-4.09889	2.9878e-05
A_23_P420348	-4.0547	0.000100459
A_32_P113682	-4.04773	0.00345982
A_23_P361014	-4.02817	0.000886849
A_32_P30891	-4.02375	0.000775357
A_23_P207999	-3.96125	0.00283508
A_23_P207999	-3.96125	0.00283508
A_23_P207999	-3.96125	0.00283508
A_23_P207999	-3.96125	0.00283508
A_23_P207999	-3.96125	0.00283508
A_32_P48066	-3.94032	0.000704638
A_24_P167825	-3.93021	2.9878e-05
A_23_P352648	-3.92702	0.000151384
A_23_P41470	-3.91812	0.00326319
A_23_P310372	-3.91053	0.00356739
A_24_P788878	-3.9037	0.000875949
A_23_P65996	-3.90168	0.00175864
A_23_P213766	-3.89896	0.00203217
A_23_P201179	-3.84644	0.00113276
A_23_P8497	-3.82963	5.79583e-05
A_23_P215790	-3.82554	0.000233729
A_23_P215790	-3.82554	0.000233729
A_23_P215790	-3.82554	0.000233729
A_23_P215790	-3.82554	0.000233729
A_23_P215790	-3.82554	0.000233729
A_23_P215790	-3.82554	0.000233729
A_23_P124837	-3.81989	0.001421
A_23_P124837	-3.81989	0.001421
A_23_P124837	-3.81989	0.001421
A_23_P124837	-3.81989	0.001421
A_24_P238896	-3.79197	0.00611032
A_32_P210572	-3.78447	4.5913e-05
A_24_P307025	-3.77413	0.00175367
A_24_P936875	-3.76459	0.000715478
A_24_P204257	-3.76404	0.000692606
A_23_P502470	-3.75268	1.78567e-05
A_24_P930049	-3.74376	0.00237108
A_23_P47527	-3.73245	5.79583e-05
A_24_P560332	-3.68557	0.00230475
A_23_P162982	-3.66184	0.00265777
A_32_P111394	-3.64421	0.00598352
A_24_P414419	-3.63625	0.00191325
A_24_P673063	-3.62779	0.000394022
A_23_P310492	-3.59206	3.13989e-05
A_23_P154522	-3.57537	0.000978718
A_23_P145437	-3.57223	0.000647557
A_23_P170427	-3.56765	0.000341939
A_23_P115563	-3.56748	3.42693e-05
A_23_P117302	-3.56623	0.000712089
A_24_P247699	-3.54932	0.000964706
A_24_P333445	-3.54402	0.0007908
A_23_P258531	-3.53541	0.00406543
A_32_P30656	-3.53186	0.00225181
A_23_P251868	-3.52318	0.00226809
A_23_P152107	-3.51232	0.0014274
A_23_P84475	-3.4859	0.00152456
A_23_P417383	-3.48441	0.00203146
A_32_P102745	-3.47043	0.00209431
A_23_P411277	-3.4452	4.50362e-05
A_23_P313512	-3.44203	0.000508115
A_24_P250614	-3.4361	0.00544259
A_23_P2973	-3.43332	7.07673e-05
A_23_P152873	-3.41836	0.000135866
A_23_P16648	-3.41043	0.000985253
A_23_P97749	-3.3979	0.000378765
A_24_P372932	-3.39404	0.00134901
A_24_P926189	-3.38354	0.000126328
A_32_P135558	-3.37571	0.00295417
A_24_P129326	-3.37236	0.00824429
A_32_P45462	-3.3723	5.31055e-05
A_24_P926432	-3.36413	0.000800512
A_24_P114551	-3.355	0.00406543
A_24_P110601	-3.35091	8.19325e-05
A_23_P108641	-3.34443	0.00282042
A_23_P309292	-3.33914	0.00554299
A_23_P257905	-3.32787	0.00102673
A_23_P11713	-3.31837	0.00132739
A_32_P28872	-3.31621	0.000532091
A_24_P557019	-3.313	0.00173922
A_32_P200697	-3.30272	8.38749e-05
A_23_P171409	-3.29284	0.000135866
A_23_P41390	-3.28043	0.000278787
A_24_P4661	-3.26187	3.42693e-05
A_23_P12079	-3.23631	0.000415433
A_32_P195756	-3.23494	0.000112981
A_24_P4736	-3.23162	0.00532997
A_23_P22625	-3.21966	0.00023865
A_23_P87727	-3.21458	0.000105808
A_23_P201940	-3.21099	0.00137709
A_23_P141180	-3.21	0.000478471
A_23_P152181	-3.20855	0.000230668
A_32_P136662	-3.20213	0.00017946
A_24_P347411	-3.19387	1.78567e-05
A_24_P314585	-3.19027	0.000721823
A_24_P916195	-3.18808	3.75704e-05
A_23_P151459	-3.18297	8.38749e-05
A_24_P387437	-3.18147	0.000145947
A_24_P118721	-3.17158	0.000594311
A_24_P76521	-3.17105	0.00090931
A_24_P343233	-3.16759	0.00381617
A_24_P343233	-3.16759	0.00381617
A_24_P343233	-3.16759	0.00381617
A_24_P343233	-3.16759	0.00381617
A_23_P17382	-3.16358	0.00828861
A_24_P590537	-3.15614	0.00624085
A_32_P136982	-3.15088	5.79583e-05
A_32_P112970	-3.15017	0.00017946
A_23_P107911	-3.14948	0.00163886
A_23_P32036	-3.14894	0.00165413
A_24_P341489	-3.14703	0.00266801
A_23_P404536	-3.14185	6.6024e-05
A_23_P125990	-3.13982	0.000776591
A_24_P143138	-3.13871	2.55823e-05
A_23_P31765	-3.13515	0.000636608
A_24_P817223	-3.13287	0.000119708
A_32_P103162	-3.13265	5.31055e-05
A_32_P159192	-3.12674	0.000321831
A_23_P109017	-3.12283	0.00919667
A_24_P415624	-3.11009	0.000115873
A_23_P145904	-3.10625	0.00183564
A_24_P321752	-3.10585	0.00191096
A_23_P82738	-3.10374	0.00347253
A_23_P82738	-3.10374	0.00347253
A_23_P82738	-3.10374	0.00347253
A_23_P82738	-3.10374	0.00347253
A_32_P157580	-3.09732	0.00229304
A_24_P350186	-3.09055	0.00895335
A_24_P37355	-3.08685	0.000969366
A_23_P144911	-3.08032	0.000251515
A_23_P128319	-3.07668	0.000104122
A_23_P105562	-3.06371	0.000212463
A_23_P105562	-3.06371	0.000212463
A_23_P105562	-3.06371	0.000212463
A_23_P105562	-3.06371	0.000212463
A_23_P105562	-3.06371	0.000212463
A_23_P105562	-3.06371	0.000212463
A_24_P915276	-3.06331	0.00810419
A_32_P181891	-3.05518	0.000212424
A_24_P134235	-3.05464	0.00143245
A_32_P181339	-3.05111	0.00149551
A_24_P74731	-3.04314	0.00433818
A_23_P216915	-3.04248	0.000307884
A_23_P113716	-3.04098	0.000137387
A_23_P113716	-3.04098	0.000137387
A_23_P113716	-3.04098	0.000137387
A_23_P113716	-3.04098	0.000137387
A_23_P113716	-3.04098	0.000137387
A_32_P192586	-3.03868	4.50362e-05
A_24_P363609	-3.03346	8.06e-05
A_23_P162640	-3.03234	0.00041191
A_32_P69536	-3.02365	0.000385385
A_32_P898690	-3.01702	0.00130333
A_23_P253081	-3.01067	8.06e-05
A_23_P145889	-3.00738	0.00166437
A_23_P14340	-3.00069	0.000621156
A_23_P108501	-2.98222	0.00680891
A_23_P24870	-2.97952	5.31055e-05
A_23_P24870	-2.97952	5.31055e-05
A_23_P24870	-2.97952	5.31055e-05
A_23_P24870	-2.97952	5.31055e-05
A_24_P83799	-2.97764	0.000158928
A_24_P408981	-2.97714	0.000472442
A_32_P709998	-2.97247	8.02697e-05
A_23_P61050	-2.97018	0.00667624
A_24_P792389	-2.96614	0.00076877
A_32_P134772	-2.9649	0.000846635
A_23_P428080	-2.96302	0.00162589
A_23_P80832	-2.9611	0.000321831
A_23_P89123	-2.95781	0.00356739
A_24_P152468	-2.95167	0.00241526
A_24_P176374	-2.94662	0.000129955
A_32_P45309	-2.94373	3.75704e-05
A_23_P357966	-2.94143	0.00176251
A_23_P50508	-2.94003	0.00445866
A_23_P7313	-2.93718	5.79583e-05
A_23_P7313	-2.93718	5.79583e-05
A_23_P7313	-2.93718	5.79583e-05
A_23_P7313	-2.93718	5.79583e-05
A_23_P7313	-2.93718	5.79583e-05
A_24_P193011	-2.93685	0.000151915
A_23_P38876	-2.93499	0.00253736
A_24_P933418	-2.93148	0.000157085
A_23_P118042	-2.92766	0.00191352
A_23_P24433	-2.92761	2.9878e-05
A_24_P274270	-2.91666	0.000541946
A_24_P274270	-2.91666	0.000541946
A_24_P274270	-2.91666	0.000541946
A_23_P35330	-2.91563	0.00067971
A_23_P319466	-2.91069	0.000226043
A_24_P234822	-2.90136	7.64922e-05
A_23_P152727	-2.89892	0.000100459
A_23_P107051	-2.89202	0.00105587
A_24_P332364	-2.889	0.00367656
A_23_P145480	-2.88786	0.00159738
A_23_P43434	-2.88229	0.002309
A_32_P105465	-2.87839	8.02697e-05
A_23_P201628	-2.87241	0.00107018
A_24_P869138	-2.87194	0.000612955
A_24_P295452	-2.86522	0.000135866
A_23_P417173	-2.86052	0.00105642
A_32_P185718	-2.86051	0.000317643
A_23_P61487	-2.85904	0.000251515
A_23_P431410	-2.85735	8.27373e-05
A_32_P42213	-2.85174	0.000737064
A_32_P158355	-2.84039	0.000100459
A_24_P921584	-2.83217	0.000117271
A_23_P217498	-2.83067	0.00759284
A_23_P139265	-2.82981	0.000135866
A_32_P170178	-2.8237	6.84691e-05
A_23_P129903	-2.82324	0.00139936
A_23_P67072	-2.82072	5.79583e-05
A_24_P271049	-2.81869	0.000610824
A_23_P124022	-2.80784	0.00218314
A_24_P307714	-2.80639	0.000751744
A_24_P849319	-2.80335	4.15437e-05
A_23_P104335	-2.78818	0.000224417
A_24_P340474	-2.78763	0.000135866
A_23_P310086	-2.78074	2.9878e-05
A_23_P331072	-2.77773	0.000573964
A_23_P203150	-2.77729	0.00900469
A_23_P203498	-2.77445	0.00369715
A_23_P71503	-2.77351	0.000476366
A_23_P33539	-2.77344	0.000601574
A_32_P92171	-2.76799	0.00934832
A_32_P175934	-2.76629	2.9878e-05
A_23_P210900	-2.76359	0.000762533
A_24_P825942	-2.75947	0.000277174
A_23_P156209	-2.75572	8.19325e-05
A_23_P37275	-2.74778	0.00134382
A_24_P102080	-2.74679	5.06766e-05
A_23_P311632	-2.74678	0.00222812
A_23_P115838	-2.74657	0.000712089
A_32_P99032	-2.7359	0.00303056
A_24_P79054	-2.72471	0.00180998
A_32_P228438	-2.72098	0.00112911
A_23_P60458	-2.7193	0.000686045
A_23_P89327	-2.71589	0.00303566
A_23_P205686	-2.71162	0.000224068
A_23_P205686	-2.71162	0.000224068
A_23_P205686	-2.71162	0.000224068
A_23_P205686	-2.71162	0.000224068
A_23_P217430	-2.70486	0.00325792
A_23_P202448	-2.70302	0.00036468
A_23_P202448	-2.70302	0.00036468
A_23_P202448	-2.70302	0.00036468
A_32_P131940	-2.70226	0.00315575
A_23_P748	-2.69268	0.00165989
A_23_P212983	-2.69236	0.000221202
A_24_P210829	-2.68927	0.00111932
A_24_P490704	-2.68814	6.6024e-05
A_23_P259462	-2.68518	0.000858719
A_24_P642328	-2.68123	7.64922e-05
A_32_P178503	-2.67891	0.000237446
A_32_P170368	-2.66707	0.000916924
A_32_P169179	-2.66641	3.42693e-05
A_32_P735636	-2.66213	0.000143576
A_32_P212446	-2.66147	0.00903037
A_24_P184385	-2.65801	0.00367656
A_24_P481113	-2.65302	0.00101302
A_23_P167882	-2.65227	0.0087206
A_23_P161197	-2.65071	0.000878911
A_32_P29582	-2.64661	0.000687203
A_24_P167496	-2.64188	0.00841441
A_24_P135921	-2.63741	0.00177001
A_24_P628683	-2.63329	0.000145947
A_23_P393144	-2.63149	3.42693e-05
A_24_P926576	-2.62701	0.00225189
A_23_P204810	-2.62691	0.00120326
A_32_P16747	-2.61954	0.000515382
A_24_P169937	-2.61848	0.000928092
A_23_P8558	-2.6156	0.00378517
A_23_P377909	-2.61524	7.64922e-05
A_24_P7192	-2.61511	0.000542576
A_24_P265346	-2.61379	4.47758e-05
A_23_P218918	-2.61287	0.00156759
A_23_P218918	-2.61287	0.00156759
A_23_P218918	-2.61287	0.00156759
A_23_P218918	-2.61287	0.00156759
A_23_P218918	-2.61287	0.00156759
A_23_P218918	-2.61287	0.00156759
A_23_P90311	-2.61201	0.00123144
A_23_P23996	-2.61079	0.00667624
A_23_P96568	-2.60489	5.43603e-05
A_23_P379736	-2.60305	4.5913e-05
A_23_P8363	-2.60013	0.000451434
A_32_P187143	-2.5997	0.000695756
A_32_P197825	-2.59707	0.00472985
A_32_P70875	-2.57377	0.00175102
A_32_P780623	-2.56941	0.000114723
A_23_P126278	-2.55324	0.00133055
A_32_P230537	-2.54324	5.39574e-05
A_24_P296274	-2.54189	0.00079887
A_32_P98496	-2.53933	5.31055e-05
A_32_P205139	-2.53565	0.000288763
A_23_P18479	-2.53227	0.000720446
A_23_P411941	-2.53089	0.00010327
A_23_P5089	-2.52983	0.00305761
A_23_P69329	-2.52883	0.000234721
A_23_P373649	-2.52726	0.000197803
A_23_P111481	-2.52483	4.50362e-05
A_32_P221624	-2.51517	0.000321831
A_32_P42197	-2.51386	0.00609779
A_32_P198584	-2.51248	0.000298507
A_23_P350249	-2.51168	0.000209955
A_23_P119611	-2.51071	0.000889785
A_32_P795513	-2.50398	0.00050611
A_23_P30736	-2.5036	8.19325e-05
A_24_P886040	-2.50318	3.45739e-05
A_23_P54736	-2.49871	0.00148874
A_23_P58072	-2.49387	0.00229959
A_23_P79703	-2.49217	4.52827e-05
A_24_P247774	-2.49158	0.000652544
A_32_P100326	-2.48391	0.00310748
A_32_P184518	-2.48287	8.3923e-05
A_24_P496839	-2.48272	4.47758e-05
A_23_P7074	-2.48256	0.000488477
A_32_P169222	-2.47946	0.00769283
A_32_P11359	-2.47928	0.00128091
A_23_P99559	-2.47756	0.000897639
A_24_P318400	-2.47745	0.00432654
A_24_P934345	-2.4759	0.000737989
A_23_P35645	-2.47041	0.000649477
A_32_P97506	-2.46431	8.00578e-05
A_23_P56091	-2.46423	0.00908405
A_23_P153098	-2.46217	0.00175284
A_23_P26810	-2.45799	0.000844548
A_23_P26810	-2.45799	0.000844548
A_23_P26810	-2.45799	0.000844548
A_23_P26810	-2.45799	0.000844548
A_23_P26810	-2.45799	0.000844548
A_23_P16197	-2.45768	0.00338114
A_32_P10403	-2.45651	0.000888917
A_24_P46066	-2.4564	0.000308448
A_23_P354288	-2.45594	0.00992587
A_23_P31477	-2.45534	0.00153862
A_24_P315862	-2.4539	0.00165413
A_24_P911612	-2.45217	0.000611556
A_23_P71440	-2.44973	0.00768155
A_24_P256093	-2.44941	0.00756785
A_23_P204947	-2.44352	0.00815106
A_23_P204947	-2.44352	0.00815106
A_23_P204947	-2.44352	0.00815106
A_23_P204947	-2.44352	0.00815106
A_24_P193027	-2.43872	0.00630267
A_24_P699737	-2.43289	0.000195319
A_23_P37244	-2.42395	0.000307465
A_23_P156852	-2.42323	0.000247325
A_23_P407132	-2.41724	0.00509087
A_23_P41217	-2.40657	0.00250359
A_24_P226116	-2.4063	0.00214002
A_32_P18147	-2.39983	0.00279639
A_23_P27315	-2.39715	0.000484537
A_23_P43317	-2.3971	4.50362e-05
A_24_P293358	-2.39501	0.000620713
A_24_P367247	-2.39335	0.000598079
A_24_P325533	-2.39313	0.000515382
A_23_P9232	-2.39287	0.0025913
A_24_P693986	-2.3901	0.000942037
A_23_P97296	-2.38709	0.00751715
A_23_P139509	-2.38351	0.000131937
A_23_P139509	-2.38351	0.000131937
A_23_P206484	-2.37899	0.00365195
A_24_P32151	-2.37649	0.000447546
A_24_P818378	-2.37549	0.000230195
A_23_P321913	-2.37336	0.00288612
A_23_P205746	-2.37223	0.000515382
A_23_P418006	-2.37163	0.000224499
A_32_P145989	-2.36843	0.0010979
A_32_P41858	-2.36686	0.00586386
A_24_P281338	-2.36596	0.00807268
A_23_P431890	-2.36333	0.00101302
A_23_P201538	-2.36128	0.000813122
A_23_P201538	-2.36128	0.000813122
A_23_P201538	-2.36128	0.000813122
A_23_P201538	-2.36128	0.000813122
A_23_P201538	-2.36128	0.000813122
A_23_P201538	-2.36128	0.000813122
A_23_P201538	-2.36128	0.000813122
A_23_P201538	-2.36128	0.000813122
A_23_P6535	-2.36019	0.000314633
A_32_P217128	-2.35993	0.00375939
A_24_P331711	-2.35318	0.00169398
A_32_P75695	-2.35085	0.00536098
A_32_P427222	-2.3503	0.00617551
A_23_P50807	-2.34863	0.0081939
A_23_P131596	-2.34514	0.000840798
A_24_P932760	-2.34105	0.000954113
A_24_P67618	-2.34099	0.00263506
A_24_P62883	-2.33671	0.00330894
A_23_P147782	-2.33357	0.00588363
A_24_P842002	-2.33251	0.00356739
A_32_P30187	-2.33174	0.00379016
A_23_P92967	-2.33106	0.00110566
A_24_P185018	-2.32903	0.000353507
A_24_P150149	-2.32779	0.00062951
A_32_P55427	-2.326	0.00640077
A_32_P11	-2.32593	0.00665876
A_24_P716349	-2.32314	0.000461343
A_23_P151870	-2.32311	0.00594171
A_32_P48198	-2.32302	0.0046815
A_23_P156261	-2.32103	0.00022159
A_32_P187851	-2.31856	0.000730144
A_23_P306987	-2.31849	0.00135855
A_23_P378588	-2.31709	5.06766e-05
A_24_P408047	-2.31526	0.000541141
A_24_P258277	-2.31339	0.000526681
A_23_P38630	-2.31316	5.06766e-05
A_23_P128609	-2.31285	0.000141688
A_23_P402000	-2.30767	0.00170606
A_32_P92101	-2.30337	0.000610824
A_23_P425880	-2.3033	0.00977179
A_32_P213210	-2.29775	0.000558341
A_24_P150194	-2.29481	0.000954113
A_23_P363149	-2.29441	0.000602404
A_23_P86550	-2.29326	0.00285328
A_23_P97161	-2.28828	0.000143576
A_32_P40375	-2.28642	5.06766e-05
A_32_P46404	-2.28517	0.00126702
A_24_P174641	-2.28058	0.00266666
A_23_P106016	-2.28041	0.000185163
A_24_P479682	-2.2777	0.000254391
A_23_P65254	-2.27731	0.000266863
A_23_P107087	-2.27389	0.00650655
A_24_P218074	-2.27145	0.000105808
A_32_P319880	-2.27031	0.000954113
A_32_P104861	-2.26956	0.00326345
A_24_P542375	-2.26848	0.000523353
A_23_P325080	-2.26687	0.000231275
A_23_P132536	-2.26011	0.000446996
A_24_P35478	-2.25906	0.00016873
A_23_P257694	-2.2583	0.00721456
A_24_P53353	-2.25822	0.00059176
A_24_P935114	-2.25705	7.22331e-05
A_23_P358564	-2.25643	0.000160967
A_24_P83455	-2.25008	0.000731
A_23_P79836	-2.2479	0.0047498
A_24_P312058	-2.24603	0.0011609
A_23_P122152	-2.2459	5.71737e-05
A_23_P250735	-2.24334	0.00107491
A_23_P18078	-2.24139	0.000256825
A_32_P73775	-2.23878	0.00409207
A_23_P369994	-2.23693	0.000636073
A_23_P167723	-2.23649	0.00342095
A_23_P218569	-2.23562	0.00433818
A_23_P127727	-2.23466	0.00341552
A_32_P2068	-2.23411	0.000203189
A_23_P305120	-2.2333	0.00017995
A_23_P11192	-2.23323	0.00275558
A_24_P213277	-2.22861	0.00902442
A_23_P321160	-2.22823	0.000402486
A_23_P37137	-2.2268	0.00488968
A_24_P457912	-2.2249	0.00103105
A_32_P324533	-2.22343	0.00890709
A_23_P74269	-2.22325	0.000347768
A_32_P227845	-2.22296	0.00785852
A_32_P162939	-2.22129	0.00244866
A_23_P58337	-2.22121	0.00029889
A_23_P428329	-2.22089	0.00590154
A_24_P226541	-2.22051	0.0011659
A_24_P665504	-2.2205	7.64922e-05
A_24_P49298	-2.21892	0.000341939
A_23_P215944	-2.2136	7.22331e-05
A_23_P96872	-2.21345	0.000954006
A_23_P354855	-2.2116	7.64922e-05
A_23_P83599	-2.21022	0.000835588
A_24_P911648	-2.21003	7.79589e-05
A_23_P53126	-2.20946	0.000256825
A_23_P53126	-2.20946	0.000256825
A_23_P53126	-2.20946	0.000256825
A_23_P53126	-2.20946	0.000256825
A_23_P255503	-2.20943	0.000139901
A_32_P231415	-2.20812	0.000415433
A_32_P58361	-2.20663	7.64922e-05
A_24_P388659	-2.20606	0.000368807
A_23_P135966	-2.20423	0.00126656
A_23_P11262	-2.19783	0.0011838
A_23_P134502	-2.19648	0.00621463
A_23_P332789	-2.19462	0.00175367
A_23_P26824	-2.19283	0.00032259
A_23_P63829	-2.19251	7.64922e-05
A_24_P153880	-2.19159	0.00336838
A_32_P67209	-2.19034	0.000147239
A_23_P40926	-2.18985	0.000243472
A_24_P16470	-2.18925	0.00032259
A_23_P201687	-2.18566	5.31055e-05
A_24_P218509	-2.18398	0.00564314
A_23_P145024	-2.18155	0.00108015
A_23_P145024	-2.18155	0.00108015
A_23_P145024	-2.18155	0.00108015
A_23_P145024	-2.18155	0.00108015
A_23_P305692	-2.17709	0.00338801
A_23_P428248	-2.17678	0.00977179
A_24_P250666	-2.17453	0.000103035
A_24_P920826	-2.17451	6.50766e-05
A_24_P669854	-2.17116	0.00255717
A_23_P139434	-2.17034	0.00364682
A_23_P58359	-2.16868	0.00437761
A_32_P231346	-2.16842	0.00798405
A_24_P58477	-2.16609	0.00176004
A_23_P30122	-2.16568	5.31055e-05
A_23_P30122	-2.16568	5.31055e-05
A_23_P30122	-2.16568	5.31055e-05
A_24_P144881	-2.16457	0.000402271
A_23_P79221	-2.16445	0.00012379
A_32_P509169	-2.16273	0.00639148
A_24_P135862	-2.16168	0.0062612
A_24_P940666	-2.15907	0.000277174
A_24_P239578	-2.15726	0.000443654
A_24_P59667	-2.15612	0.00152173
A_23_P368691	-2.15496	0.000985253
A_23_P334870	-2.15424	5.31055e-05
A_23_P217049	-2.15082	0.00678227
A_24_P90005	-2.14854	0.00059176
A_23_P153586	-2.14765	0.000131937
A_23_P109843	-2.14611	0.00209474
A_32_P15288	-2.1454	0.00550161
A_23_P99837	-2.14496	0.000224499
A_32_P223370	-2.13915	0.00060941
A_23_P407203	-2.13375	0.00114182
A_23_P206501	-2.13228	0.00660202
A_24_P364236	-2.13224	0.000270122
A_24_P14328	-2.13137	0.000240763
A_24_P696133	-2.12778	0.00010338
A_24_P208721	-2.12705	0.00474228
A_23_P365081	-2.12605	0.000311138
A_24_P64362	-2.12356	0.0015258
A_24_P940776	-2.12352	0.000730144
A_23_P349147	-2.12243	0.000650303
A_24_P17710	-2.12084	0.000183193
A_23_P55099	-2.12065	8.70116e-05
A_23_P55099	-2.12065	8.70116e-05
A_23_P55099	-2.12065	8.70116e-05
A_23_P55099	-2.12065	8.70116e-05
A_32_P80523	-2.11778	0.000420527
A_32_P114246	-2.11654	0.00566292
A_23_P57927	-2.11631	0.000234454
A_23_P71513	-2.11472	0.00414521
A_23_P368338	-2.1146	0.00624548
A_23_P155487	-2.11431	0.000332333
A_23_P328836	-2.11382	6.50766e-05
A_23_P165608	-2.11265	8.91546e-05
A_24_P182182	-2.11077	0.000284904
A_23_P502612	-2.11046	0.000195319
A_23_P332413	-2.10792	0.00144781
A_24_P665105	-2.10665	0.000240763
A_32_P5205	-2.10396	0.00775147
A_24_P937582	-2.10369	0.000866715
A_23_P408341	-2.10313	7.53198e-05
A_24_P205327	-2.10161	0.000563176
A_23_P33141	-2.10079	0.00191213
A_32_P11764	-2.10003	0.000288763
A_23_P132444	-2.099	0.00115245
A_24_P99679	-2.09857	0.00388963
A_24_P99679	-2.09857	0.00388963
A_24_P99679	-2.09857	0.00388963
A_24_P99679	-2.09857	0.00388963
A_24_P99679	-2.09857	0.00388963
A_24_P99679	-2.09857	0.00388963
A_24_P941557	-2.09586	0.00590684
A_24_P341006	-2.09401	0.00101682
A_23_P131706	-2.09381	0.00148874
A_32_P102718	-2.09225	0.000892111
A_24_P349728	-2.09207	0.000594311
A_23_P83289	-2.09155	0.00323227
A_23_P135417	-2.09094	0.00751715
A_32_P373557	-2.0887	0.00017635
A_32_P113566	-2.088	0.00950671
A_24_P187948	-2.08679	0.000506108
A_24_P416131	-2.08672	0.00852051
A_24_P11142	-2.08603	0.000151915
A_24_P837234	-2.08516	0.00188344
A_23_P166400	-2.08377	0.00214784
A_23_P329727	-2.08213	0.00010338
A_24_P211351	-2.0817	0.00368929
A_23_P148798	-2.08125	7.79259e-05
A_23_P148798	-2.08125	7.79259e-05
A_23_P148798	-2.08125	7.79259e-05
A_23_P148798	-2.08125	7.79259e-05
A_23_P148798	-2.08125	7.79259e-05
A_23_P148798	-2.08125	7.79259e-05
A_23_P400078	-2.07642	7.64922e-05
A_23_P400078	-2.07642	7.64922e-05
A_23_P400078	-2.07642	7.64922e-05
A_23_P400078	-2.07642	7.64922e-05
A_23_P400078	-2.07642	7.64922e-05
A_24_P294703	-2.073	0.000730144
A_23_P430792	-2.06787	0.000742819
A_23_P25790	-2.06658	0.00010583
A_23_P143867	-2.0656	0.00138023
A_23_P16089	-2.06534	0.00454285
A_23_P214080	-2.06425	0.00468011
A_24_P269327	-2.06323	0.00922839
A_24_P697345	-2.06256	0.0039514
A_24_P287043	-2.0606	8.05128e-05
A_23_P65208	-2.05928	0.00269022
A_23_P377629	-2.05861	0.00010338
A_23_P409462	-2.05781	0.0019469
A_23_P56150	-2.05756	0.000224417
A_32_P179859	-2.05697	0.000475444
A_24_P93931	-2.05696	0.00161175
A_24_P630039	-2.05636	0.000532091
A_24_P348173	-2.05634	7.22331e-05
A_23_P140716	-2.05564	7.64922e-05
A_23_P107238	-2.05554	0.00156841
A_24_P8304	-2.05539	0.00269195
A_24_P911161	-2.0553	0.0029742
A_24_P350890	-2.05453	0.00883256
A_24_P934679	-2.05448	0.000341939
A_23_P430948	-2.05441	0.00131034
A_23_P161595	-2.05402	0.0064524
A_24_P916435	-2.05263	0.00188095
A_23_P212284	-2.05203	0.000970025
A_23_P380951	-2.052	0.00563429
A_23_P108948	-2.05183	0.00239171
A_24_P920949	-2.05153	0.00401834
A_24_P65803	-2.05152	0.00405872
A_24_P551758	-2.04806	0.00259121
A_24_P66125	-2.04583	0.000266854
A_24_P202558	-2.04525	0.000649477
A_24_P647163	-2.04472	0.00294931
A_24_P332647	-2.04467	0.0040744
A_32_P63848	-2.04072	8.38749e-05
A_32_P138939	-2.0398	0.000785376
A_24_P802562	-2.03883	0.00226595
A_23_P109143	-2.03745	0.000399368
A_23_P109143	-2.03745	0.000399368
A_23_P109143	-2.03745	0.000399368
A_23_P109143	-2.03745	0.000399368
A_23_P109143	-2.03745	0.000399368
A_24_P284213	-2.03631	0.00231799
A_23_P303286	-2.03559	0.00469505
A_23_P42746	-2.03414	0.00230592
A_23_P406508	-2.03277	0.000398366
A_23_P422071	-2.03221	0.000189328
A_32_P186710	-2.0288	8.02697e-05
A_24_P187407	-2.02834	0.00535849
A_23_P161792	-2.02626	0.000786041
A_32_P155811	-2.02554	0.00283465
A_24_P929762	-2.02506	0.000235295
A_23_P212042	-2.02502	0.000648791
A_23_P163278	-2.02463	0.000105808
A_23_P13820	-2.02334	0.000259302
A_24_P76546	-2.02228	0.00039958
A_24_P910060	-2.02122	0.00614308
A_23_P205046	-2.02065	0.000961902
A_24_P330303	-2.02062	0.00569846
A_23_P131111	-2.01975	0.000931204
A_23_P167349	-2.01871	0.000354445
A_23_P115375	-2.01865	0.000347768
A_23_P116765	-2.01783	0.000172852
A_23_P251680	-2.0173	0.000107427
A_24_P76142	-2.01721	0.00259787
A_32_P209094	-2.01659	0.00100779
A_23_P375524	-2.01422	0.00379605
A_23_P51410	-2.01159	0.00127736
A_23_P376870	-2.01118	0.00144692
A_32_P57717	-2.01058	0.00446127
A_23_P167509	-2.01021	0.000284628
A_32_P183765	-2.00861	0.00012379
A_23_P156807	-2.00861	0.000474175
A_24_P385000	-2.00614	7.79259e-05
A_32_P215100	-2.00406	0.000131937
A_23_P27346	-2.00396	0.001395
A_23_P27346	-2.00396	0.001395
A_23_P27346	-2.00396	0.001395
A_23_P27346	-2.00396	0.001395
A_23_P27346	-2.00396	0.001395
A_23_P51039	-2.00276	0.00036468
A_32_P235753	-2.00253	0.00366357
A_23_P24688	-1.99962	0.00340877
A_24_P548264	-1.9995	0.000730144
A_24_P172293	-1.99828	0.00175367
A_24_P35537	-1.99799	0.00317302
A_24_P261734	-1.9973	0.00417884
A_32_P453191	-1.99558	0.000110915
A_24_P226867	-1.9953	0.00106092
A_23_P9075	-1.99511	0.00854423
A_23_P216610	-1.99467	0.000598079
A_23_P140792	-1.99414	0.00329659
A_24_P359117	-1.99257	0.000971638
A_24_P184230	-1.99227	0.000431601
A_23_P259521	-1.99123	0.00017995
A_23_P29851	-1.9856	0.0026853
A_23_P137410	-1.98538	0.00010338
A_23_P370684	-1.98372	0.00405964
A_23_P42565	-1.98368	0.00183564
A_24_P497843	-1.9835	0.00102088
A_23_P39656	-1.98283	0.00110418
A_23_P307042	-1.98249	0.00120329
A_24_P943815	-1.98182	0.000105808
A_23_P255126	-1.98171	0.000515382
A_23_P215634	-1.98167	0.000112552
A_23_P215634	-1.98167	0.000112552
A_23_P215634	-1.98167	0.000112552
A_23_P215634	-1.98167	0.000112552
A_23_P206359	-1.98133	0.0044654
A_23_P206359	-1.98133	0.0044654
A_23_P206359	-1.98133	0.0044654
A_23_P406889	-1.98119	0.000264067
A_24_P579482	-1.97876	0.000402077
A_23_P384635	-1.97638	0.00341691
A_23_P165984	-1.97422	0.00255429
A_23_P211080	-1.9728	0.00159043
A_23_P346309	-1.97125	0.001395
A_23_P44794	-1.97085	0.00960353
A_23_P18887	-1.97054	0.000127767
A_24_P121846	-1.96986	0.000205011
A_24_P195528	-1.9698	0.000289797
A_24_P926960	-1.96928	0.000914083
A_23_P205367	-1.96554	0.000628613
A_23_P137031	-1.96548	0.00058962
A_24_P697493	-1.96486	0.00010338
A_23_P114075	-1.96447	0.00037205
A_23_P212149	-1.96363	0.000893323
A_24_P494440	-1.96304	0.00017946
A_24_P921660	-1.96261	0.0042488
A_23_P86021	-1.96214	0.00406543
A_32_P170879	-1.96187	0.00058962
A_24_P482592	-1.96088	9.0937e-05
A_23_P340312	-1.95999	0.000284628
A_24_P366033	-1.95998	0.0046529
A_32_P4934	-1.95945	0.000730144
A_23_P400794	-1.95943	9.0937e-05
A_32_P215714	-1.95921	0.0014578
A_32_P221096	-1.95761	0.00165367
A_23_P129717	-1.95499	0.00544275
A_23_P70849	-1.95459	0.00146155
A_23_P70849	-1.95459	0.00146155
A_23_P70849	-1.95459	0.00146155
A_23_P70849	-1.95459	0.00146155
A_32_P43349	-1.95453	0.000248833
A_23_P119102	-1.9544	0.00250984
A_23_P110569	-1.95438	0.00915178
A_24_P170295	-1.95437	0.000239575
A_32_P119616	-1.95381	0.00533153
A_23_P39766	-1.95284	0.00218009
A_23_P250629	-1.95277	0.00294931
A_23_P301372	-1.95202	0.00882461
A_23_P83493	-1.95166	0.00135855
A_32_P932089	-1.95122	0.0011838
A_23_P86064	-1.94966	0.0018906
A_23_P137543	-1.94755	0.00356739
A_23_P341503	-1.94721	0.00250386
A_32_P16493	-1.94689	0.000266863
A_32_P169383	-1.94683	0.00223877
A_24_P62615	-1.94612	0.00955499
A_24_P807935	-1.9455	8.27373e-05
A_23_P212854	-1.94528	0.000175001
A_23_P46928	-1.94174	0.0061688
A_24_P556503	-1.93929	0.000656986
A_24_P245330	-1.93905	0.0095717
A_24_P282031	-1.93813	8.19325e-05
A_32_P29395	-1.93779	0.00139306
A_32_P9048	-1.93319	0.00908221
A_24_P306925	-1.93304	0.000258566
A_24_P273114	-1.93183	0.000560311
A_23_P157628	-1.93158	0.00432177
A_24_P913819	-1.93089	0.0042309
A_23_P140821	-1.92809	0.00831441
A_24_P398691	-1.9277	0.00269476
A_32_P191717	-1.92693	0.000259836
A_32_P182683	-1.9246	0.00421132
A_23_P81805	-1.9242	0.00720422
A_23_P81805	-1.9242	0.00720422
A_23_P81805	-1.9242	0.00720422
A_24_P588235	-1.92416	0.000205804
A_24_P132039	-1.9239	0.0076253
A_32_P87631	-1.92343	0.00555892
A_24_P194508	-1.92162	0.00782338
A_23_P164507	-1.92125	0.00580153
A_32_P194004	-1.92	0.00945797
A_24_P481431	-1.91924	8.38749e-05
A_23_P43690	-1.91911	0.000485251
A_24_P392863	-1.91833	0.00906858
A_23_P422350	-1.9153	0.00144709
A_23_P96611	-1.91478	0.00109025
A_23_P114048	-1.91476	0.00563228
A_24_P231120	-1.91394	0.000235295
A_23_P311875	-1.91382	0.000209955
A_24_P398781	-1.9135	0.000234454
A_24_P670475	-1.91276	0.00736023
A_23_P28980	-1.91271	0.00512608
A_24_P943106	-1.91242	0.000586832
A_24_P642771	-1.91199	0.00246645
A_23_P114008	-1.91121	0.000111754
A_23_P152505	-1.90921	0.00229159
A_24_P187284	-1.9084	0.000150106
A_24_P635991	-1.90732	0.000476366
A_32_P144596	-1.90715	0.000243869
A_32_P33034	-1.90695	0.00895413
A_23_P55666	-1.90683	8.38749e-05
A_32_P157415	-1.90681	0.00270829
A_23_P254801	-1.90626	8.06e-05
A_23_P254801	-1.90626	8.06e-05
A_23_P254801	-1.90626	8.06e-05
A_23_P254801	-1.90626	8.06e-05
A_23_P254801	-1.90626	8.06e-05
A_23_P502750	-1.90504	0.002343
A_23_P502750	-1.90504	0.002343
A_23_P502750	-1.90504	0.002343
A_23_P502750	-1.90504	0.002343
A_23_P502750	-1.90504	0.002343
A_23_P502750	-1.90504	0.002343
A_23_P68910	-1.90234	0.00255429
A_32_P201041	-1.90232	0.000207202
A_23_P8513	-1.90039	0.00757073
A_23_P157895	-1.89973	0.000315483
A_24_P137461	-1.8995	0.00284833
A_23_P215625	-1.89666	0.00101784
A_23_P204564	-1.89629	0.0039514
A_32_P156947	-1.89595	0.000186709
A_23_P90436	-1.89545	0.00135492
A_23_P120776	-1.89465	0.000158801
A_23_P418493	-1.89402	0.00830685
A_23_P211363	-1.89342	0.00695787
A_24_P312671	-1.893	0.00163816
A_23_P201279	-1.8921	8.05128e-05
A_23_P150092	-1.89172	0.00118559
A_24_P927972	-1.89102	0.00977179
A_23_P21800	-1.89001	0.00129404
A_24_P49142	-1.88992	0.0029633
A_23_P51278	-1.88888	0.000270228
A_23_P204277	-1.88842	0.000474175
A_23_P82795	-1.88823	0.00333069
A_32_P121785	-1.88755	0.00254472
A_32_P162716	-1.88667	0.00065677
A_23_P58967	-1.88663	0.00588363
A_32_P466877	-1.8862	0.00108078
A_23_P107247	-1.88485	0.000627864
A_23_P111267	-1.88479	0.000105808
A_23_P1056	-1.88316	0.00143529
A_23_P218608	-1.8825	0.00487727
A_23_P218608	-1.8825	0.00487727
A_23_P218608	-1.8825	0.00487727
A_23_P218608	-1.8825	0.00487727
A_23_P106806	-1.88237	0.000135866
A_23_P412321	-1.88187	0.000894358
A_23_P412321	-1.88187	0.000894358
A_23_P412321	-1.88187	0.000894358
A_23_P412321	-1.88187	0.000894358
A_32_P27878	-1.88042	9.37982e-05
A_24_P232809	-1.87974	0.00928249
A_23_P27688	-1.87957	0.00742605
A_32_P220326	-1.87955	0.000754482
A_23_P334083	-1.87954	0.00451279
A_24_P199484	-1.87898	0.00747234
A_32_P220523	-1.87685	0.000315453
A_23_P119395	-1.87663	0.00824429
A_23_P250747	-1.87562	0.00614308
A_23_P54144	-1.87539	0.000601574
A_23_P85604	-1.87492	0.000236948
A_24_P222114	-1.87456	0.00338063
A_24_P76898	-1.87447	0.000197803
A_23_P15233	-1.87339	0.00141055
A_24_P1255	-1.87328	0.00141854
A_32_P843613	-1.87327	0.00977179
A_23_P3450	-1.87319	0.00265539
A_23_P167711	-1.87319	0.00110801
A_23_P47034	-1.87301	0.0056054
A_24_P263036	-1.87149	0.000541141
A_24_P349783	-1.87099	0.00730485
A_23_P87435	-1.86995	0.000711371
A_23_P394154	-1.86983	0.000954113
A_24_P493005	-1.86979	0.00258838
A_23_P69179	-1.86867	0.000574984
A_24_P585838	-1.86794	0.000620713
A_23_P123905	-1.86732	0.00491189
A_32_P30630	-1.86702	0.00121777
A_24_P339416	-1.86587	0.000259302
A_24_P497235	-1.86464	0.000457351
A_24_P264004	-1.86446	0.00914712
A_24_P375962	-1.86429	0.000145947
A_23_P215060	-1.86309	0.00090931
A_23_P17269	-1.86203	0.00307643
A_23_P17269	-1.86203	0.00307643
A_23_P17269	-1.86203	0.00307643
A_23_P17269	-1.86203	0.00307643
A_23_P17269	-1.86203	0.00307643
A_23_P17269	-1.86203	0.00307643
A_23_P17269	-1.86203	0.00307643
A_23_P17269	-1.86203	0.00307643
A_24_P209571	-1.86117	0.00296213
A_23_P41314	-1.85924	0.000755127
A_23_P122947	-1.85924	0.00175753
A_23_P48807	-1.85861	0.00924194
A_23_P49254	-1.85854	0.000256825
A_24_P917556	-1.85621	0.00464619
A_24_P368735	-1.85582	0.00460727
A_23_P323943	-1.85573	0.001395
A_23_P132684	-1.85529	0.00041191
A_32_P121751	-1.85383	0.00300955
A_24_P655849	-1.85342	0.000933907
A_24_P162287	-1.8524	0.00162487
A_24_P63109	-1.85221	0.00535512
A_24_P365025	-1.85148	0.00516116
A_24_P914688	-1.85018	0.000614107
A_23_P144005	-1.84942	0.00198335
A_23_P343671	-1.84843	0.00919615
A_24_P152566	-1.84797	0.00738673
A_32_P234294	-1.84779	0.00121049
A_23_P312752	-1.84753	0.000139527
A_23_P146294	-1.8474	0.00326345
A_23_P207783	-1.84724	0.00178159
A_23_P11764	-1.84651	0.00135855
A_23_P9756	-1.84527	0.00554299
A_24_P250922	-1.84505	0.000755127
A_24_P250922	-1.84505	0.000755127
A_24_P250922	-1.84505	0.000755127
A_24_P250922	-1.84505	0.000755127
A_24_P250922	-1.84505	0.000755127
A_24_P562369	-1.84484	0.000473469
A_24_P397817	-1.84368	0.000489565
A_24_P397817	-1.84368	0.000489565
A_24_P397817	-1.84368	0.000489565
A_24_P397817	-1.84368	0.000489565
A_23_P23765	-1.84185	0.00934832
A_23_P23765	-1.84185	0.00934832
A_23_P23765	-1.84185	0.00934832
A_23_P353679	-1.84161	0.000754482
A_32_P58912	-1.84154	0.00871261
A_23_P420373	-1.84129	0.003816
A_23_P133236	-1.84119	0.00217546
A_24_P920409	-1.84067	0.00348462
A_32_P173571	-1.83975	9.0937e-05
A_23_P114221	-1.8394	0.00231046
A_23_P70213	-1.83909	0.00254082
A_23_P70213	-1.83909	0.00254082
A_23_P70213	-1.83909	0.00254082
A_32_P187349	-1.83898	0.000145862
A_23_P126393	-1.83759	0.000127861
A_24_P925779	-1.83752	0.00849331
A_23_P211056	-1.83752	0.00241526
A_23_P77174	-1.83743	0.000699723
A_24_P285522	-1.8351	0.000237446
A_23_P308603	-1.83435	0.000476366
A_23_P308603	-1.83435	0.000476366
A_23_P308603	-1.83435	0.000476366
A_23_P325991	-1.83434	0.000864972
A_23_P70509	-1.83429	0.000417677
A_32_P126362	-1.83275	0.00474342
A_23_P48339	-1.83078	9.24162e-05
A_23_P84670	-1.82802	0.00092029
A_23_P209519	-1.82729	0.00163478
A_32_P174130	-1.82716	0.000844047
A_24_P940275	-1.82681	0.000321831
A_24_P829209	-1.82666	0.00272443
A_23_P89431	-1.8262	0.000139901
A_23_P89431	-1.8262	0.000139901
A_23_P89431	-1.8262	0.000139901
A_23_P210675	-1.82545	0.000162367
A_24_P934083	-1.82513	0.00184126
A_24_P185484	-1.82451	0.000145947
A_24_P18270	-1.82417	0.00165413
A_23_P130444	-1.824	0.00979357
A_32_P80231	-1.82253	0.00781327
A_32_P47121	-1.82195	0.00801416
A_32_P51848	-1.82188	0.00964851
A_23_P15937	-1.82145	0.00211387
A_23_P15937	-1.82145	0.00211387
A_23_P15937	-1.82145	0.00211387
A_23_P137573	-1.82067	0.00210158
A_23_P255637	-1.81922	0.00395417
A_23_P302654	-1.81903	0.00191917
A_24_P61029	-1.81797	0.00695782
A_23_P159764	-1.81789	0.000799701
A_24_P942621	-1.81754	0.00226101
A_24_P99152	-1.81753	0.002343
A_32_P142836	-1.81659	0.00143482
A_23_P431776	-1.81632	0.000402678
A_23_P102192	-1.81627	0.000298077
A_23_P49041	-1.81546	0.000308448
A_32_P207428	-1.81417	0.00695996
A_32_P78295	-1.81412	0.00726407
A_24_P301547	-1.81343	0.00285328
A_32_P224157	-1.81276	0.000273207
A_32_P39866	-1.8121	0.00402365
A_23_P26154	-1.81177	0.000157085
A_24_P924301	-1.81175	0.00352908
A_23_P309224	-1.81165	0.00127856
A_24_P810828	-1.81022	0.00067971
A_23_P364444	-1.81002	0.00786792
A_24_P890995	-1.80718	0.000332333
A_24_P203284	-1.807	0.000298507
A_24_P105564	-1.80622	0.00894596
A_23_P165090	-1.8056	0.00520825
A_24_P261383	-1.8056	0.00692919
A_24_P404458	-1.80527	0.00587949
A_24_P236935	-1.80453	0.00801931
A_23_P29566	-1.80379	0.00614308
A_24_P299108	-1.80374	0.00798118
A_24_P248240	-1.80336	0.00725299
A_24_P927850	-1.80295	0.00186068
A_24_P194000	-1.80178	0.0011331
A_23_P385690	-1.80121	0.00103808
A_24_P325691	-1.80077	0.000971128
A_24_P921366	-1.80047	0.00243628
A_23_P415806	-1.79912	0.000840235
A_32_P13337	-1.79895	0.00819632
A_23_P51587	-1.79811	0.00135855
A_23_P132760	-1.79748	0.00151017
A_23_P307274	-1.79701	0.00761312
A_23_P142688	-1.79694	0.000984972
A_24_P932710	-1.79657	0.00504214
A_23_P165325	-1.79629	0.00272049
A_23_P134225	-1.79562	0.00173195
A_23_P423419	-1.79368	0.00433818
A_23_P106727	-1.79338	0.00542516
A_32_P60076	-1.79189	0.00023379
A_24_P183334	-1.79175	0.00375703
A_24_P322474	-1.79091	0.000126328
A_32_P2452	-1.78953	0.000145947
A_24_P725998	-1.78836	0.00284328
A_24_P247978	-1.78611	0.000147239
A_24_P82848	-1.78599	0.00128459
A_24_P417352	-1.78562	0.00041191
A_23_P164436	-1.78549	0.00614308
A_23_P111306	-1.78497	0.00480762
A_24_P189464	-1.78492	0.0084115
A_23_P315273	-1.78441	0.00227544
A_24_P334378	-1.78434	0.0080784
A_32_P169114	-1.78362	0.00473458
A_24_P67096	-1.78338	0.00039958
A_23_P86037	-1.78332	0.000657414
A_32_P139260	-1.78282	0.00322376
A_23_P141092	-1.78261	0.000302407
A_32_P436884	-1.78202	0.00624725
A_23_P125253	-1.78175	0.00504431
A_23_P73702	-1.78063	0.00159826
A_23_P201816	-1.77989	0.00426505
A_23_P158176	-1.77988	0.00192029
A_23_P15247	-1.77937	0.00826103
A_23_P137797	-1.77825	0.00593622
A_23_P77714	-1.77751	0.00554299
A_32_P114831	-1.77644	0.000138162
A_23_P75749	-1.7754	0.0040447
A_32_P182186	-1.77442	0.000484537
A_23_P117580	-1.77381	0.00296975
A_24_P920157	-1.7737	0.00437175
A_23_P13772	-1.77311	0.00360659
A_23_P150325	-1.77307	0.000771919
A_32_P181603	-1.77228	0.00460879
A_23_P145584	-1.77214	0.00657119
A_23_P343843	-1.77104	0.0091337
A_24_P399888	-1.77023	0.00143529
A_23_P162374	-1.76986	0.000118924
A_24_P145629	-1.76767	0.00409207
A_24_P724212	-1.76739	0.00934091
A_24_P85117	-1.76734	0.00111163
A_24_P33595	-1.76669	0.00136499
A_23_P501583	-1.76651	0.000228643
A_24_P921412	-1.76626	0.000173164
A_24_P272254	-1.76619	0.00614308
A_23_P59481	-1.76596	0.00466906
A_23_P13907	-1.76563	0.00058962
A_23_P13907	-1.76563	0.00058962
A_23_P13907	-1.76563	0.00058962
A_23_P105833	-1.76531	0.00042322
A_24_P579826	-1.76531	0.000771525
A_23_P97283	-1.76457	0.000847395
A_23_P342067	-1.76418	0.000379353
A_23_P356021	-1.76414	0.0076253
A_32_P336776	-1.76373	0.00452444
A_24_P752416	-1.76342	0.00101682
A_24_P144773	-1.76236	0.000873105
A_23_P141142	-1.76122	0.0058789
A_24_P65779	-1.76115	0.000132524
A_24_P715719	-1.76099	0.00395018
A_23_P109508	-1.76009	0.00259121
A_24_P654255	-1.75999	0.00203034
A_32_P79763	-1.75942	0.00060223
A_23_P213706	-1.75898	0.00926459
A_23_P213706	-1.75898	0.00926459
A_23_P213706	-1.75898	0.00926459
A_23_P213706	-1.75898	0.00926459
A_23_P213706	-1.75898	0.00926459
A_23_P213706	-1.75898	0.00926459
A_23_P312358	-1.75796	0.000778362
A_23_P352365	-1.75761	0.00138023
A_23_P38100	-1.75751	0.000688143
A_32_P164378	-1.75739	0.000239339
A_23_P129458	-1.75435	0.00216553
A_23_P218584	-1.75387	0.000835879
A_23_P165162	-1.75307	0.00862452
A_24_P148503	-1.75285	0.00156512
A_23_P66481	-1.75257	0.000674811
A_32_P220762	-1.75253	0.00872384
A_23_P28105	-1.7517	0.000277174
A_23_P69791	-1.75132	0.0089016
A_32_P91902	-1.75109	0.00157618
A_23_P147423	-1.75082	0.00446024
A_23_P93739	-1.7508	0.000528234
A_24_P156886	-1.75039	0.000288763
A_24_P59220	-1.75011	0.00272432
A_24_P555473	-1.74986	0.00781327
A_24_P772147	-1.74976	0.00175443
A_24_P336596	-1.74932	0.00216948
A_23_P157758	-1.74829	0.0011659
A_24_P486462	-1.74828	0.00333423
A_23_P218158	-1.74795	0.00222045
A_23_P255194	-1.7473	0.000282304
A_24_P873757	-1.74726	0.00140464
A_24_P925709	-1.74685	0.000332333
A_23_P8142	-1.74561	0.0034617
A_23_P101374	-1.74551	0.000288763
A_23_P20480	-1.74492	0.00104378
A_23_P329573	-1.74475	0.00474784
A_23_P329573	-1.74475	0.00474784
A_23_P329573	-1.74475	0.00474784
A_23_P329573	-1.74475	0.00474784
A_23_P329573	-1.74475	0.00474784
A_23_P329573	-1.74475	0.00474784
A_32_P26443	-1.74411	0.000607769
A_23_P87216	-1.7427	0.00147855
A_24_P25872	-1.74242	0.000878789
A_23_P119627	-1.74216	0.00151829
A_24_P144556	-1.74173	0.00130237
A_23_P136671	-1.74155	0.000207202
A_23_P30976	-1.74065	0.00424924
A_32_P887687	-1.74036	0.00506164
A_23_P83339	-1.73894	0.00865352
A_24_P921957	-1.73893	0.00496666
A_23_P211047	-1.73838	0.000350102
A_24_P755505	-1.73741	0.00152456
A_23_P315772	-1.73696	0.00130437
A_24_P602255	-1.73592	0.000424412
A_32_P54274	-1.73551	0.00109753
A_32_P116881	-1.7355	0.00025875
A_32_P132545	-1.73502	0.00677838
A_23_P153070	-1.73451	0.00776762
A_23_P211106	-1.73447	0.00876396
A_23_P120504	-1.73391	0.00431719
A_23_P402899	-1.73363	0.000208045
A_32_P171903	-1.73344	0.000284904
A_24_P685241	-1.73253	0.00758301
A_23_P52266	-1.73173	0.00273265
A_24_P161317	-1.73091	0.00372494
A_32_P36046	-1.73063	0.000452346
A_23_P77145	-1.72959	0.000698195
A_24_P392351	-1.72931	0.000361072
A_23_P257578	-1.72923	0.00175081
A_23_P149613	-1.72893	0.00144816
A_23_P42855	-1.72837	0.000625225
A_23_P91727	-1.72825	0.00558324
A_23_P141389	-1.72615	0.00878613
A_23_P62406	-1.72569	0.00311107
A_24_P34186	-1.72443	0.00305761
A_32_P228521	-1.72334	0.00091733
A_23_P214658	-1.72098	0.000835879
A_24_P903460	-1.72016	0.00243496
A_23_P155900	-1.71971	0.000735153
A_23_P156319	-1.71934	0.000594311
A_23_P55319	-1.71882	0.00076877
A_24_P481411	-1.71832	0.00282635
A_24_P800824	-1.71832	0.000298507
A_23_P55749	-1.7183	0.000472197
A_24_P22939	-1.71804	0.00475119
A_23_P98898	-1.71627	0.00276809
A_23_P98898	-1.71627	0.00276809
A_23_P98898	-1.71627	0.00276809
A_23_P98898	-1.71627	0.00276809
A_23_P28886	-1.71414	0.00655845
A_23_P28886	-1.71414	0.00655845
A_23_P28886	-1.71414	0.00655845
A_23_P28886	-1.71414	0.00655845
A_23_P28886	-1.71414	0.00655845
A_23_P28886	-1.71414	0.00655845
A_32_P411592	-1.71375	0.00987337
A_24_P268015	-1.71335	0.000649477
A_24_P314962	-1.71269	0.000307978
A_24_P84668	-1.7111	0.00149551
A_24_P944444	-1.71089	0.00574811
A_23_P166716	-1.71019	0.00211132
A_23_P166716	-1.71019	0.00211132
A_23_P166716	-1.71019	0.00211132
A_23_P166716	-1.71019	0.00211132
A_23_P166716	-1.71019	0.00211132
A_23_P112531	-1.71017	0.00240455
A_23_P203318	-1.70839	0.000703876
A_23_P424710	-1.70792	0.000800783
A_23_P407115	-1.70765	0.00123157
A_23_P336644	-1.70755	0.00630047
A_32_P75559	-1.70722	0.00417601
A_23_P106602	-1.70688	0.000172513
A_32_P30320	-1.70681	0.000586832
A_23_P215956	-1.70556	0.000344684
A_23_P215956	-1.70556	0.000344684
A_23_P215956	-1.70556	0.000344684
A_24_P252078	-1.70392	0.00513584
A_24_P230907	-1.70388	0.000277389
A_32_P194095	-1.70353	0.0018006
A_23_P419503	-1.70273	0.00692766
A_32_P121834	-1.70239	0.000405791
A_32_P114866	-1.70237	0.00126656
A_24_P362904	-1.70099	0.00655845
A_23_P81298	-1.70072	0.00142017
A_24_P278273	-1.7004	0.00871381
A_32_P74901	-1.69991	0.00044161
A_23_P76761	-1.6995	0.000866275
A_23_P35467	-1.69936	0.000602457
A_23_P202156	-1.69931	0.000347768
A_23_P202156	-1.69931	0.000347768
A_23_P202156	-1.69931	0.000347768
A_23_P202156	-1.69931	0.000347768
A_23_P202156	-1.69931	0.000347768
A_24_P538478	-1.69715	0.00271033
A_24_P349616	-1.69705	0.00059176
A_24_P320171	-1.69606	0.00131988
A_23_P386384	-1.69602	0.00853817
A_23_P132730	-1.6959	0.00348956
A_23_P404005	-1.69577	0.00167655
A_23_P137865	-1.69535	0.000792874
A_32_P512500	-1.69417	0.00758397
A_23_P136986	-1.69257	0.00758397
A_23_P423389	-1.69244	0.00231799
A_32_P48466	-1.69221	0.000190905
A_24_P230037	-1.69033	0.0034946
A_24_P163632	-1.68973	0.00356739
A_24_P250185	-1.68823	0.00561314
A_23_P57492	-1.68631	0.00058962
A_23_P372467	-1.68468	0.00690839
A_23_P502142	-1.68467	0.00037205
A_23_P502142	-1.68467	0.00037205
A_23_P502142	-1.68467	0.00037205
A_23_P502142	-1.68467	0.00037205
A_23_P502142	-1.68467	0.00037205
A_23_P502142	-1.68467	0.00037205
A_23_P502142	-1.68467	0.00037205
A_32_P158892	-1.68449	0.00640077
A_32_P4071	-1.68386	0.00169561
A_24_P388252	-1.68338	0.00143903
A_24_P516246	-1.68297	0.00489281
A_24_P77219	-1.68279	0.00726652
A_23_P83835	-1.68257	0.000631635
A_32_P176790	-1.68239	0.00101415
A_24_P912606	-1.68233	0.00042322
A_23_P58328	-1.68016	0.00240455
A_24_P270829	-1.67989	0.000371789
A_24_P202769	-1.67942	0.000521148
A_23_P324989	-1.67937	0.000971126
A_24_P254551	-1.67844	0.00278623
A_23_P131785	-1.67843	0.000264067
A_23_P433760	-1.67817	0.00586386
A_24_P344295	-1.67812	0.00079238
A_32_P5666	-1.67765	0.00329856
A_23_P417753	-1.67728	0.00282314
A_23_P334328	-1.67607	0.00257875
A_23_P138910	-1.67587	0.00844517
A_32_P49654	-1.67581	0.000508115
A_24_P270460	-1.6758	0.000438572
A_23_P214727	-1.67551	0.000382122
A_23_P359015	-1.67533	0.00127054
A_23_P200443	-1.67477	0.000771919
A_23_P200443	-1.67477	0.000771919
A_23_P200443	-1.67477	0.000771919
A_23_P200443	-1.67477	0.000771919
A_23_P107116	-1.67443	0.00216838
A_23_P214432	-1.67441	0.000294419
A_24_P918792	-1.67398	0.00107752
A_23_P131954	-1.67388	0.00658245
A_23_P161968	-1.67353	0.00450711
A_32_P2844	-1.67317	0.0086691
A_23_P363163	-1.6731	0.000634695
A_24_P941090	-1.67306	0.00566777
A_23_P170839	-1.67234	0.000485251
A_32_P116556	-1.67215	0.000206733
A_32_P128773	-1.6719	0.00381818
A_23_P60856	-1.67189	0.00282042
A_23_P207014	-1.67183	0.00187531
A_24_P809786	-1.67124	0.000730536
A_24_P83846	-1.6698	0.00160868
A_24_P113264	-1.669	0.00286972
A_32_P147189	-1.66836	0.00522172
A_24_P193961	-1.66809	0.000224417
A_24_P350017	-1.66801	0.00655702
A_23_P56433	-1.66794	0.000283705
A_23_P217611	-1.66736	0.0050018
A_24_P919995	-1.66735	0.000254913
A_23_P347618	-1.66735	0.00349749
A_32_P131050	-1.66605	0.000360588
A_23_P417965	-1.66534	0.00346189
A_23_P11729	-1.66439	0.0001803
A_24_P723735	-1.66279	0.0070122
A_32_P213946	-1.66275	0.00702177
A_23_P22143	-1.66214	0.00208688
A_23_P201035	-1.66212	0.00594171
A_24_P937931	-1.6615	0.000642346
A_32_P233091	-1.66074	0.00250503
A_32_P186821	-1.6604	0.00614308
A_32_P111362	-1.66026	0.000259689
A_23_P210872	-1.65963	0.00234927
A_23_P82002	-1.65787	0.00130533
A_32_P164573	-1.65731	0.00542826
A_24_P246278	-1.65659	0.00101302
A_24_P84099	-1.6564	0.00347253
A_24_P136807	-1.65609	0.00259787
A_23_P69368	-1.65584	0.00333423
A_23_P145159	-1.65578	0.000442357
A_23_P96209	-1.65482	0.000456806
A_24_P912490	-1.65453	0.000224499
A_24_P398092	-1.65446	0.000556949
A_32_P100610	-1.65426	0.00606527
A_23_P74550	-1.65372	0.00240665
A_24_P19983	-1.65368	0.00319558
A_23_P216522	-1.65328	0.00153993
A_32_P184260	-1.65202	0.00116523
A_23_P27147	-1.65186	0.00889844
A_23_P36757	-1.6517	0.00930979
A_24_P538459	-1.65055	0.00990136
A_24_P912074	-1.65038	0.00602047
A_23_P201605	-1.65037	0.0016429
A_24_P857669	-1.64981	0.00267976
A_24_P923629	-1.64921	0.00121889
A_24_P53778	-1.6492	0.000523202
A_23_P254330	-1.64897	0.00392937
A_23_P74081	-1.64889	0.000412445
A_23_P74081	-1.64889	0.000412445
A_23_P74081	-1.64889	0.000412445
A_23_P74081	-1.64889	0.000412445
A_23_P74081	-1.64889	0.000412445
A_23_P74081	-1.64889	0.000412445
A_23_P74081	-1.64889	0.000412445
A_24_P219952	-1.64879	0.00633719
A_24_P935243	-1.64796	0.00347253
A_23_P396832	-1.6472	0.00613906
A_23_P114689	-1.64624	0.00601122
A_23_P63447	-1.64487	0.00375432
A_23_P51479	-1.64447	0.000203493
A_32_P36778	-1.64446	0.0016429
A_23_P80129	-1.64331	0.00996419
A_24_P122137	-1.64305	0.00423226
A_24_P921748	-1.64303	0.00465046
A_23_P52634	-1.64243	0.000521416
A_23_P163955	-1.641	0.00515628
A_32_P133780	-1.64094	0.00126816
A_23_P397341	-1.64058	0.000653141
A_24_P306304	-1.64015	0.000811567
A_24_P98555	-1.63956	0.00023636
A_32_P105083	-1.63908	0.00158213
A_32_P23113	-1.63822	0.00630894
A_24_P194714	-1.63786	0.00652816
A_23_P56170	-1.63772	0.000209955
A_23_P133216	-1.63742	0.000321831
A_23_P103424	-1.63704	0.00030324
A_23_P58529	-1.63699	0.00325785
A_24_P940599	-1.63597	0.00769283
A_23_P104651	-1.63538	0.00110555
A_24_P190894	-1.63515	0.000552542
A_32_P306678	-1.6348	0.000299024
A_24_P221928	-1.63465	0.00348098
A_23_P250462	-1.63429	0.00135855
A_24_P938597	-1.63337	0.00237233
A_23_P89941	-1.63331	0.00241313
A_23_P309739	-1.63252	0.00149087
A_23_P309739	-1.63252	0.00149087
A_23_P309739	-1.63252	0.00149087
A_23_P121851	-1.63224	0.00135855
A_24_P332541	-1.63183	0.000883779
A_24_P256830	-1.63086	0.000315483
A_23_P127547	-1.6304	0.00210158
A_32_P139505	-1.63033	0.000526681
A_24_P212549	-1.63022	0.00567987
A_32_P81657	-1.6291	0.00891018
A_24_P212389	-1.62838	0.00552447
A_23_P141847	-1.62807	0.00121049
A_23_P170273	-1.6268	0.00775268
A_23_P142045	-1.62679	0.00218101
A_24_P79199	-1.6242	0.000542501
A_24_P130296	-1.62392	0.00487981
A_24_P208567	-1.62388	0.0023979
A_23_P68007	-1.62377	0.000998239
A_23_P328545	-1.62372	0.00652816
A_24_P481824	-1.62361	0.000273207
A_23_P207600	-1.62358	0.00833902
A_23_P8820	-1.62303	0.00083186
A_24_P599396	-1.62228	0.00135533
A_23_P368101	-1.62168	0.000334027
A_23_P113728	-1.62121	0.000234721
A_23_P207170	-1.62089	0.0018923
A_23_P352291	-1.62081	0.00131657
A_24_P163009	-1.62071	0.00189108
A_23_P145669	-1.62065	0.00294931
A_23_P168909	-1.61961	0.00060223
A_24_P130952	-1.61955	0.0010322
A_23_P62227	-1.61838	0.000700705
A_32_P5628	-1.61805	0.00313949
A_24_P419286	-1.6177	0.00515628
A_24_P786713	-1.61733	0.00343338
A_24_P398950	-1.61664	0.00229742
A_23_P26367	-1.61658	0.000344684
A_24_P362540	-1.61623	0.000459157
A_23_P70168	-1.6162	0.000485251
A_23_P362637	-1.6155	0.00345516
A_24_P76635	-1.61498	0.00293928
A_23_P1361	-1.61427	0.00123257
A_23_P55076	-1.61238	0.00700832
A_24_P625683	-1.61234	0.000361072
A_24_P211832	-1.61225	0.00333689
A_24_P48898	-1.61219	0.00235392
A_24_P657117	-1.61182	0.00318684
A_23_P206441	-1.61166	0.000326259
A_23_P206441	-1.61166	0.000326259
A_23_P206441	-1.61166	0.000326259
A_24_P410627	-1.61149	0.000913187
A_23_P48513	-1.61027	0.00335442
A_23_P48513	-1.61027	0.00335442
A_23_P48513	-1.61027	0.00335442
A_23_P348194	-1.6097	0.00420904
A_23_P155807	-1.60939	0.00156566
A_23_P208812	-1.60863	0.00876396
A_23_P28075	-1.60789	0.0033128
A_32_P45285	-1.60754	0.000941797
A_24_P125335	-1.60733	0.00266801
A_24_P123616	-1.60713	0.000240368
A_23_P125815	-1.6067	0.00345982
A_24_P7570	-1.60594	0.00217768
A_24_P382026	-1.60585	0.00138023
A_24_P43681	-1.60567	0.000525796
A_23_P95417	-1.60506	0.00160169
A_24_P245767	-1.60497	0.00163816
A_23_P90220	-1.60471	0.00279188
A_23_P345799	-1.60448	0.000864972
A_23_P363203	-1.60384	0.000442357
A_23_P126899	-1.60347	0.00382868
A_24_P71468	-1.60295	0.00243886
A_32_P228455	-1.60284	0.00441018
A_24_P151213	-1.6021	0.00832711
A_23_P26878	-1.60097	0.000268008
A_24_P277155	-1.60008	0.00284612
A_32_P5168	-1.60004	0.00383162
A_24_P419017	-1.60004	0.00453531
A_23_P9614	-1.59905	0.00392691
A_23_P300255	-1.59851	0.00312515
A_23_P304304	-1.5977	0.00560032
A_23_P124003	-1.59762	0.00354915
A_23_P164387	-1.59745	0.00829843
A_24_P239419	-1.59731	0.00225181
A_32_P23525	-1.59712	0.00427079
A_32_P205596	-1.59555	0.00933136
A_24_P388622	-1.59495	0.00305761
A_23_P58036	-1.59365	0.00811978
A_23_P431430	-1.59361	0.000332333
A_23_P406330	-1.59237	0.00706267
A_23_P129322	-1.59205	0.00455449
A_23_P388301	-1.59132	0.00162003
A_32_P86173	-1.59021	0.000918516
A_32_P44808	-1.59015	0.00263487
A_23_P388170	-1.58929	0.00317499
A_23_P121037	-1.58926	0.00177714
A_24_P377775	-1.58876	0.00158804
A_23_P309930	-1.58621	0.0039591
A_23_P72157	-1.58616	0.00122533
A_23_P93623	-1.5861	0.000349926
A_23_P71530	-1.58587	0.000993745
A_23_P71530	-1.58587	0.000993745
A_23_P71530	-1.58587	0.000993745
A_23_P71530	-1.58587	0.000993745
A_23_P71530	-1.58587	0.000993745
A_32_P211188	-1.58563	0.00214329
A_24_P487766	-1.58446	0.00359328
A_32_P210407	-1.58424	0.00406543
A_23_P392544	-1.58362	0.00254068
A_23_P374294	-1.5835	0.000442357
A_24_P910898	-1.58327	0.00630894
A_32_P50846	-1.58311	0.00575985
A_24_P210406	-1.58308	0.00635778
A_23_P303891	-1.58204	0.00250503
A_23_P122674	-1.58077	0.00208416
A_23_P122674	-1.58077	0.00208416
A_24_P886197	-1.58076	0.00241526
A_23_P57036	-1.57981	0.00067013
A_23_P57036	-1.57981	0.00067013
A_23_P57036	-1.57981	0.00067013
A_23_P57036	-1.57981	0.00067013
A_23_P103511	-1.57968	0.00976146
A_24_P786025	-1.57827	0.000360588
A_24_P578641	-1.57799	0.00166437
A_32_P758538	-1.57783	0.00129934
A_23_P218892	-1.57757	0.00291675
A_23_P137503	-1.57727	0.00633011
A_24_P290046	-1.57641	0.000475444
A_24_P345837	-1.57608	0.00425111
A_24_P195785	-1.57589	0.00311688
A_23_P204472	-1.57583	0.00216338
A_23_P204472	-1.57583	0.00216338
A_23_P204472	-1.57583	0.00216338
A_23_P55716	-1.57564	0.00091869
A_24_P35228	-1.57549	0.00442847
A_23_P127446	-1.57529	0.00224272
A_24_P936419	-1.57522	0.000601267
A_24_P74828	-1.57479	0.000268008
A_24_P254101	-1.57471	0.00544259
A_23_P135190	-1.57467	0.00815666
A_23_P302750	-1.57438	0.00948759
A_24_P396881	-1.57431	0.0086988
A_24_P299429	-1.57264	0.00228892
A_23_P35943	-1.57231	0.00124732
A_23_P360744	-1.57142	0.0039514
A_32_P11786	-1.57102	0.00456332
A_32_P17343	-1.56988	0.000761524
A_32_P209909	-1.56976	0.00265539
A_24_P722068	-1.56961	0.00146952
A_23_P91207	-1.56903	0.00211449
A_23_P207927	-1.56836	0.000878699
A_32_P360193	-1.56818	0.000477125
A_24_P75245	-1.56809	0.000506526
A_24_P372580	-1.56586	0.00323674
A_24_P178148	-1.56438	0.00556357
A_24_P944320	-1.56381	0.000302407
A_23_P165007	-1.56327	0.00623595
A_23_P144726	-1.56305	0.00944389
A_24_P814872	-1.56232	0.00907311
A_24_P717462	-1.56169	0.00992587
A_24_P39639	-1.56106	0.00321687
A_32_P214781	-1.55905	0.00364449
A_24_P914797	-1.55829	0.000601267
A_24_P938553	-1.55799	0.00881647
A_23_P57248	-1.55789	0.00491225
A_23_P33759	-1.55698	0.00126013
A_32_P29149	-1.55635	0.00356496
A_24_P523530	-1.55588	0.00232249
A_23_P335661	-1.55512	0.00579009
A_23_P74449	-1.55465	0.00348462
A_24_P280274	-1.55423	0.00180211
A_24_P24724	-1.55385	0.00255717
A_23_P350001	-1.55321	0.00391741
A_24_P349151	-1.55268	0.00934832
A_24_P155058	-1.55212	0.00190713
A_24_P919168	-1.55186	0.000710555
A_24_P242646	-1.55172	0.0012871
A_32_P50603	-1.55148	0.00897049
A_24_P488352	-1.5514	0.00432692
A_24_P126892	-1.55092	0.00637968
A_32_P9737	-1.55069	0.000444269
A_24_P247316	-1.55046	0.0005923
A_23_P138058	-1.55037	0.00259121
A_24_P226076	-1.55023	0.00261564
A_23_P160968	-1.55017	0.000590515
A_24_P196774	-1.54939	0.00411108
A_24_P630875	-1.54886	0.00279635
A_24_P914922	-1.54614	0.000801
A_24_P573978	-1.54609	0.00730485
A_23_P9523	-1.54556	0.00254905
A_32_P35256	-1.54536	0.00950745
A_23_P165541	-1.54494	0.0024184
A_24_P223518	-1.54471	0.00192133
A_23_P44636	-1.54426	0.00272443
A_32_P157124	-1.54388	0.00144816
A_24_P170538	-1.54292	0.00433343
A_23_P125829	-1.54284	0.00177714
A_23_P125829	-1.54284	0.00177714
A_23_P92650	-1.54275	0.00669341
A_24_P362850	-1.54242	0.00693353
A_23_P106362	-1.54193	0.00585515
A_32_P229329	-1.54133	0.0011331
A_24_P209428	-1.5412	0.0010708
A_24_P375819	-1.54016	0.000586832
A_23_P153256	-1.53945	0.000649477
A_23_P117506	-1.53923	0.00278704
A_24_P563966	-1.53917	0.00681204
A_24_P92411	-1.5386	0.00555085
A_24_P106057	-1.53844	0.00387197
A_24_P699252	-1.5377	0.00074298
A_24_P279520	-1.5372	0.00586386
A_24_P306905	-1.53718	0.00403369
A_23_P65757	-1.53656	0.00329767
A_24_P104538	-1.5358	0.00214329
A_32_P112623	-1.53485	0.00665876
A_32_P82515	-1.53469	0.00058962
A_23_P500614	-1.53435	0.00209215
A_23_P12911	-1.5332	0.00153131
A_23_P152963	-1.53258	0.00979357
A_32_P191859	-1.532	0.00300955
A_24_P891276	-1.53192	0.000769784
A_23_P138826	-1.53179	0.0042488
A_23_P360316	-1.53153	0.000603635
A_24_P88775	-1.5311	0.0069539
A_23_P200960	-1.53099	0.000379353
A_23_P339954	-1.53077	0.00102088
A_23_P417100	-1.53011	0.00263879
A_24_P46725	-1.52993	0.000415586
A_24_P109417	-1.5299	0.000695142
A_23_P500824	-1.52978	0.00270829
A_23_P136909	-1.52846	0.00868592
A_23_P136909	-1.52846	0.00868592
A_23_P136909	-1.52846	0.00868592
A_23_P136909	-1.52846	0.00868592
A_23_P46903	-1.52834	0.00036468
A_24_P302584	-1.52827	0.00695996
A_24_P929570	-1.52826	0.00644428
A_32_P111609	-1.52812	0.00123866
A_23_P259333	-1.5276	0.000399368
A_24_P384636	-1.52689	0.00134382
A_23_P307346	-1.5265	0.00978345
A_24_P674924	-1.52648	0.00970864
A_24_P303974	-1.52568	0.00220569
A_23_P79416	-1.52563	0.00255699
A_23_P166548	-1.52536	0.00895335
A_24_P503866	-1.52486	0.00673165
A_32_P201923	-1.52446	0.00327308
A_32_P106925	-1.52427	0.000538727
A_23_P391443	-1.52423	0.00391326
A_32_P216809	-1.52384	0.0030165
A_23_P91970	-1.52362	0.00801931
A_24_P102636	-1.5231	0.00992587
A_23_P138289	-1.52256	0.00240665
A_24_P58034	-1.52254	0.00047352
A_32_P173922	-1.52185	0.00266186
A_24_P203678	-1.52176	0.00554299
A_23_P99320	-1.52172	0.00220569
A_23_P344568	-1.52169	0.00119279
A_23_P74737	-1.52165	0.00258838
A_24_P146892	-1.52114	0.00560032
A_24_P367496	-1.52079	0.000555461
A_24_P206305	-1.52054	0.00713051
A_24_P161068	-1.52028	0.00074298
A_23_P35989	-1.52016	0.00118626
A_23_P20864	-1.51994	0.0010708
A_24_P82074	-1.51994	0.00927406
A_24_P33444	-1.51975	0.00149551
A_23_P210060	-1.51952	0.00758397
A_32_P35603	-1.5192	0.00163816
A_24_P108301	-1.5185	0.00394344
A_24_P153803	-1.51828	0.0033762
A_24_P192183	-1.51805	0.00773724
A_23_P69491	-1.51804	0.00299968
A_23_P69491	-1.51804	0.00299968
A_23_P69491	-1.51804	0.00299968
A_23_P69491	-1.51804	0.00299968
A_23_P69491	-1.51804	0.00299968
A_23_P69491	-1.51804	0.00299968
A_24_P482202	-1.51779	0.000810858
A_32_P221991	-1.51729	0.00290551
A_32_P226858	-1.51726	0.00679973
A_32_P91228	-1.51694	0.00902684
A_23_P120442	-1.51687	0.00948333
A_32_P135385	-1.5162	0.00630267
A_32_P56713	-1.51616	0.000987611
A_24_P281025	-1.51563	0.0099209
A_24_P603453	-1.51404	0.00364639
A_23_P216622	-1.51373	0.00775268
A_23_P202496	-1.5121	0.000532091
A_23_P202496	-1.5121	0.000532091
A_23_P202496	-1.5121	0.000532091
A_23_P202496	-1.5121	0.000532091
A_24_P385205	-1.51208	0.00569846
A_24_P461881	-1.51131	0.000423214
A_23_P169092	-1.51131	0.00490561
A_23_P117286	-1.51109	0.000931906
A_23_P62881	-1.5109	0.0016543
A_23_P251342	-1.51085	0.001395
A_23_P251342	-1.51085	0.001395
A_23_P251342	-1.51085	0.001395
A_23_P251342	-1.51085	0.001395
A_23_P250196	-1.51082	0.00226298
A_23_P250196	-1.51082	0.00226298
A_23_P250196	-1.51082	0.00226298
A_23_P250196	-1.51082	0.00226298
A_23_P250196	-1.51082	0.00226298
A_32_P49284	-1.51076	0.00113934
A_23_P132863	-1.51062	0.0010708
A_24_P149766	-1.51014	0.00041735
A_32_P217390	-1.50966	0.00371891
A_23_P138461	-1.5094	0.000483623
A_23_P434416	-1.50869	0.00978336
A_32_P79610	-1.50862	0.00176251
A_23_P30024	-1.50794	0.00105159
A_23_P30024	-1.50794	0.00105159
A_23_P30024	-1.50794	0.00105159
A_23_P30024	-1.50794	0.00105159
A_23_P30024	-1.50794	0.00105159
A_32_P30693	-1.50778	0.00144537
A_32_P217428	-1.50747	0.00962599
A_23_P87653	-1.50715	0.00083309
A_23_P37441	-1.5056	0.00268569
A_23_P37441	-1.5056	0.00268569
A_23_P37441	-1.5056	0.00268569
A_23_P37441	-1.5056	0.00268569
A_23_P37441	-1.5056	0.00268569
A_24_P933492	-1.50539	0.00209036
A_23_P403466	-1.50532	0.00497136
A_23_P13535	-1.50515	0.00818007
A_23_P124988	-1.50333	0.00131062
A_23_P74252	-1.50113	0.00954805
A_23_P25873	-1.50109	0.000737064
A_23_P25873	-1.50109	0.000737064
A_23_P25873	-1.50109	0.000737064
A_23_P109442	-1.50062	0.00678636
A_23_P147326	-1.5001	0.00707134
A_23_P86133	-1.49994	0.00224818
A_24_P592591	-1.4957	0.00268314
A_32_P38436	-1.49412	0.00133997
A_23_P82588	-1.49127	0.00148799
A_23_P92410	-1.4905	0.000647557
A_24_P306994	-1.48992	0.00311602
A_23_P24104	-1.48472	0.000541141
A_23_P24104	-1.48472	0.000541141
A_24_P42624	-1.48468	0.000647557
A_32_P90709	-1.48044	0.00391326
A_32_P133005	-1.47602	0.00598352
A_24_P11384	-1.47548	0.0070143
A_24_P556883	-1.47334	0.00640077
A_23_P75741	-1.47311	0.000786041
A_24_P246229	-1.4731	0.00155947
A_24_P633283	-1.46504	0.00128091
A_32_P228290	-1.46332	0.000938315
A_23_P63896	-1.45736	0.00387265
A_23_P42802	-1.45364	0.000602404
A_24_P917886	-1.45051	0.00117257
A_23_P30755	-1.41996	0.000971128
A_24_P98251	-1.4182	0.00279883
A_23_P57626	-1.41737	0.00934832
A_23_P39294	-1.41033	0.00701539
A_23_P253524	-1.40776	0.00347433
A_23_P253524	-1.40776	0.00347433
A_24_P1873	-1.39546	0.00422996
A_32_P13565	-1.38602	0.00802107
A_24_P917384	-1.38503	0.00279635
A_23_P423695	-1.37923	0.00714679
A_23_P256131	-1.3689	0.00288632
A_24_P357933	-1.3469	0.00231262
A_32_P38500	-1.34551	0.00207514
A_32_P138260	-1.3407	0.00471391
A_24_P281101	-1.32838	0.00406543
A_24_P173754	-1.30949	0.00880687
A_23_P16866	-1.27469	0.00545334
A_24_P919727	1.25789	0.00831441
A_23_P91423	1.27395	0.0074313
A_32_P61061	1.27422	0.00408067
A_23_P120941	1.29011	0.00715071
A_24_P678418	1.2995	0.00360271
A_23_P313938	1.30152	0.00659845
A_24_P641130	1.30383	0.00337963
A_23_P324633	1.30587	0.00959724
A_24_P68358	1.31249	0.00415078
A_23_P422204	1.31773	0.00782359
A_23_P341275	1.3311	0.00536136
A_24_P264063	1.33463	0.00234916
A_32_P190294	1.33565	0.00700294
A_24_P252043	1.34735	0.00421956
A_23_P400515	1.35275	0.00623595
A_23_P202316	1.35413	0.0090467
A_24_P33705	1.3545	0.0016543
A_32_P115475	1.36752	0.00363498
A_32_P187817	1.37596	0.00914712
A_23_P144980	1.3776	0.0015148
A_24_P345993	1.38245	0.00275514
A_24_P103434	1.38605	0.00261442
A_23_P138885	1.38695	0.00250111
A_32_P41173	1.38931	0.00350239
A_32_P44987	1.3933	0.00934832
A_23_P134419	1.39401	0.00977179
A_24_P457345	1.40302	0.00934091
A_23_P165136	1.40398	0.00252194
A_24_P184305	1.40505	0.00455719
A_23_P67648	1.40968	0.00516248
A_23_P60306	1.4184	0.00482696
A_23_P60306	1.4184	0.00482696
A_23_P60306	1.4184	0.00482696
A_23_P60306	1.4184	0.00482696
A_23_P60306	1.4184	0.00482696
A_23_P337292	1.42496	0.00482028
A_23_P377197	1.42731	0.00496666
A_24_P759747	1.43364	0.00172507
A_23_P116173	1.44103	0.002343
A_23_P421513	1.44227	0.00091869
A_32_P207151	1.44332	0.00442214
A_24_P144487	1.44956	0.00208998
A_23_P393627	1.45374	0.00630894
A_24_P399490	1.45546	0.00487727
A_23_P206612	1.45792	0.00111163
A_32_P444104	1.45916	0.00378128
A_32_P144133	1.46242	0.00101415
A_32_P182388	1.4685	0.000776591
A_23_P80040	1.46872	0.000710502
A_24_P586450	1.47047	0.00265539
A_23_P129313	1.47426	0.000651054
A_23_P73526	1.47555	0.00265777
A_32_P110917	1.48491	0.0052874
A_24_P219418	1.49166	0.00443057
A_23_P32785	1.4926	0.00860787
A_23_P116168	1.49385	0.00323861
A_23_P150147	1.49414	0.000447202
A_24_P218757	1.50006	0.00456871
A_23_P131036	1.50039	0.000895139
A_32_P37704	1.50052	0.00112842
A_23_P70148	1.50062	0.00074298
A_32_P22654	1.50074	0.00589074
A_32_P127339	1.50131	0.00169561
A_32_P150856	1.5019	0.00101415
A_24_P42316	1.50312	0.00968853
A_23_P301995	1.50331	0.0070143
A_24_P409346	1.50339	0.00141055
A_32_P127583	1.50346	0.00383951
A_23_P62840	1.50383	0.00255717
A_23_P301896	1.50413	0.00225189
A_23_P29939	1.50417	0.000614107
A_23_P29939	1.50417	0.000614107
A_23_P29939	1.50417	0.000614107
A_23_P29939	1.50417	0.000614107
A_23_P29939	1.50417	0.000614107
A_23_P29939	1.50417	0.000614107
A_24_P162718	1.50421	0.000583953
A_23_P252783	1.5044	0.00717847
A_23_P8763	1.50454	0.00373162
A_24_P290623	1.50462	0.00349582
A_32_P23731	1.50468	0.00141285
A_23_P13524	1.50476	0.00382081
A_24_P387321	1.5048	0.00868592
A_23_P211835	1.50498	0.00175864
A_23_P99027	1.50588	0.00134901
A_23_P99027	1.50588	0.00134901
A_24_P8371	1.50589	0.00271555
A_23_P41645	1.50641	0.00667624
A_23_P165927	1.50649	0.00347253
A_23_P56865	1.50657	0.000886357
A_23_P56865	1.50657	0.000886357
A_23_P56865	1.50657	0.000886357
A_23_P56865	1.50657	0.000886357
A_23_P56865	1.50657	0.000886357
A_32_P4647	1.50666	0.00283508
A_23_P92909	1.50671	0.00667624
A_32_P162494	1.50674	0.00071668
A_23_P93169	1.5074	0.00177714
A_23_P56913	1.50742	0.00370835
A_24_P928901	1.50769	0.00066746
A_24_P191884	1.5078	0.000969165
A_24_P37253	1.50792	0.00136499
A_23_P258281	1.50833	0.00113144
A_23_P420551	1.50835	0.000594311
A_32_P94521	1.50916	0.00367102
A_24_P66605	1.50923	0.0087159
A_23_P361841	1.50956	0.00399346
A_32_P26330	1.5097	0.00121073
A_24_P148590	1.50978	0.00392691
A_24_P34052	1.51023	0.0030404
A_24_P4678	1.51086	0.00305308
A_23_P152926	1.51104	0.00143186
A_32_P183301	1.51135	0.00414521
A_24_P886589	1.51193	0.00209899
A_23_P258972	1.5126	0.00533234
A_23_P349676	1.51287	0.0036837
A_23_P312874	1.51375	0.00571017
A_24_P925274	1.51399	0.00161275
A_23_P163567	1.51418	0.000853371
A_32_P76853	1.5143	0.00079887
A_23_P32500	1.51447	0.00214697
A_23_P9086	1.515	0.000526482
A_23_P135948	1.51544	0.00794667
A_24_P860662	1.51638	0.00609779
A_23_P103897	1.51682	0.0019661
A_32_P197524	1.5169	0.00488095
A_24_P324630	1.51696	0.00163666
A_24_P576650	1.51697	0.00385016
A_24_P103893	1.51715	0.00668925
A_24_P798431	1.5175	0.000608589
A_23_P48936	1.51756	0.000674811
A_23_P48936	1.51756	0.000674811
A_23_P48936	1.51756	0.000674811
A_23_P48936	1.51756	0.000674811
A_24_P915245	1.5181	0.00784188
A_32_P70420	1.51899	0.00164113
A_23_P130787	1.51944	0.00504296
A_32_P233870	1.51947	0.000447202
A_23_P52639	1.51967	0.00155176
A_32_P482979	1.51981	0.00199251
A_24_P282013	1.51988	0.0080784
A_24_P39484	1.52003	0.00228518
A_24_P129588	1.52041	0.00443891
A_24_P936911	1.52047	0.00285328
A_23_P120364	1.52075	0.00598983
A_32_P113322	1.52075	0.00602875
A_24_P19268	1.52132	0.0033089
A_24_P144377	1.52149	0.00352713
A_32_P233834	1.5216	0.00711473
A_24_P270890	1.52177	0.00897598
A_32_P14737	1.5228	0.00417884
A_24_P141629	1.52318	0.00218314
A_23_P96432	1.52369	0.00128596
A_32_P4318	1.52372	0.0017778
A_32_P179562	1.52417	0.00440254
A_24_P717609	1.52529	0.00402365
A_23_P205697	1.52543	0.00374711
A_23_P133432	1.52576	0.00483785
A_24_P242204	1.52675	0.000895081
A_23_P105044	1.52682	0.00191325
A_32_P175864	1.52732	0.00174437
A_32_P101039	1.52776	0.000895139
A_23_P22224	1.52848	0.00446024
A_23_P214121	1.5288	0.000938315
A_23_P359376	1.52921	0.00569515
A_23_P252653	1.52953	0.00065677
A_24_P179516	1.53001	0.00512128
A_23_P384108	1.5307	0.00778083
A_23_P27133	1.53072	0.00649551
A_24_P1731	1.53167	0.00285408
A_32_P130577	1.53193	0.00109906
A_23_P20728	1.53195	0.00846817
A_32_P105539	1.53208	0.000604681
A_23_P66306	1.5326	0.000864972
A_24_P126282	1.53284	0.00299408
A_32_P156373	1.53315	0.00354411
A_24_P272073	1.53325	0.00158238
A_32_P50223	1.53441	0.00421956
A_23_P148194	1.53446	0.00554299
A_23_P427217	1.53486	0.00161454
A_23_P314202	1.53513	0.0018906
A_23_P209995	1.53567	0.00258838
A_23_P1691	1.53573	0.00227412
A_23_P1691	1.53573	0.00227412
A_23_P1691	1.53573	0.00227412
A_24_P384200	1.53579	0.00278623
A_24_P336759	1.53596	0.000385385
A_23_P368773	1.53604	0.00916898
A_24_P222454	1.53609	0.00909046
A_23_P368886	1.53738	0.00309301
A_32_P156017	1.53769	0.00200895
A_23_P29719	1.53834	0.00667624
A_24_P137582	1.53877	0.000528234
A_24_P807248	1.53884	0.00722769
A_23_P109254	1.53905	0.00040195
A_24_P142305	1.53947	0.00899812
A_32_P34920	1.53988	0.00827142
A_32_P205792	1.54047	0.000515921
A_32_P437227	1.54078	0.000842683
A_23_P38618	1.54105	0.00134017
A_23_P60016	1.54123	0.000649477
A_23_P37503	1.54174	0.000361439
A_24_P739785	1.54186	0.000483623
A_23_P429581	1.54197	0.00589203
A_23_P24493	1.54224	0.00722292
A_24_P350457	1.54234	0.00188375
A_23_P168836	1.5428	0.000428984
A_23_P168836	1.5428	0.000428984
A_23_P168836	1.5428	0.000428984
A_23_P168836	1.5428	0.000428984
A_23_P168836	1.5428	0.000428984
A_23_P168836	1.5428	0.000428984
A_32_P23308	1.54298	0.00146319
A_24_P330385	1.54306	0.00105344
A_24_P25063	1.54334	0.000429232
A_24_P870176	1.54335	0.00726407
A_32_P175739	1.54369	0.00049663
A_23_P46045	1.54427	0.00294162
A_24_P85365	1.54428	0.000721109
A_23_P164718	1.5444	0.00080709
A_24_P371670	1.54457	0.00152765
A_24_P230734	1.54562	0.00826184
A_32_P18012	1.54602	0.00285216
A_23_P34644	1.54678	0.00280476
A_23_P320846	1.54681	0.00693353
A_23_P401904	1.54746	0.00498131
A_23_P380917	1.54758	0.0068939
A_24_P394865	1.54812	0.00326444
A_23_P401084	1.54862	0.00144816
A_23_P252764	1.54882	0.00175658
A_23_P306148	1.54939	0.00759577
A_23_P380076	1.54971	0.00535018
A_23_P142606	1.55046	0.00293703
A_23_P81811	1.55103	0.000811567
A_24_P888941	1.55154	0.00653347
A_32_P137883	1.55203	0.00510311
A_24_P268893	1.55217	0.00617078
A_23_P202658	1.55219	0.00609779
A_23_P202658	1.55219	0.00609779
A_23_P202658	1.55219	0.00609779
A_23_P202658	1.55219	0.00609779
[truncated: 1,486 more rows]

## Sheet: FC Same Trend
IDcommon	FC24	FDR24	FC48	FDR48	FC72	FDR72
A_23_P204810	-2.60544	0.000568644	-2.62044	0.00256894	-2.62691	0.00120326			**all the values that are regulated in the same direction
A_32_P43349	-2.56874	3.92e-05	-1.36589	0.0104616	-1.95453	0.000248833
A_24_P167825	-2.56475	3.92e-05	-1.27355	0.0160986	-3.93021	2.9878e-05
A_23_P216915	-2.39586	0.000342676	-1.31729	0.0873894	-3.04248	0.000307884
A_23_P375147	-2.37243	7.6e-05	-1.31151	0.0202894	-4.09889	2.9878e-05
A_23_P2973	-2.27011	0.000194406	-1.23162	0.0807014	-3.43332	7.07673e-05
A_23_P105562	-2.22796	0.000457254	-1.91399	0.00308925	-3.06371	0.000212463
A_32_P103162	-2.20591	0.000111551	-1.89407	0.000890456	-3.13265	5.31055e-05
A_23_P43317	-2.20397	3.92e-05	-1.1656	0.0539705	-2.3971	4.50362e-05
A_23_P369447	-2.13217	5.58e-05	-1.83389	0.000695942	-4.42325	1.78567e-05
A_23_P171409	-2.11006	0.000342676	-1.50892	0.012684	-3.29284	0.000135866
A_23_P2683	-2.07372	0.00286336	-1.64327	0.0544867	-1.62434	0.0606652
A_23_P92410	-2.05823	0.0104779	-1.22784	0.0119587	-1.4905	0.000647557
A_23_P319466	-2.0559	0.000462334	-1.92374	0.00282037	-2.91069	0.000226043
A_32_P192586	-2.00954	0.000141488	-1.90409	0.000827201	-3.03868	4.50362e-05
A_23_P45496	-2.00407	0.0047237	-1.56521	0.0755864	-1.739	0.0406212
A_23_P165201	-1.98672	0.00165544	-1.34567	0.0793546	-1.55558	0.0209459
A_32_P131940	-1.98258	0.00571613	-2.31707	0.00835975	-2.70226	0.00315575
A_23_P97749	-1.97985	0.00124244	-2.15833	0.00447277	-3.3979	0.000378765
A_24_P32118	-1.95202	0.00800606	-1.7449	0.04953	-1.52357	0.0881776
A_32_P111394	-1.94535	0.0242243	-1.98114	0.0621459	-3.64421	0.00598352
A_24_P295452	-1.924	0.000447748	-1.7562	0.00339131	-2.86522	0.000135866
A_24_P936067	-1.92399	0.0357829	-1.9346	0.098797	-2.10175	0.0730266
A_32_P27878	-1.92092	0.00020081	-1.27398	0.00585409	-1.88042	9.37982e-05
A_23_P65254	-1.91744	0.000451469	-1.30546	0.0344063	-2.27731	0.000266863
A_32_P136982	-1.91632	0.000241192	-1.9324	0.000904418	-3.15088	5.79583e-05
A_23_P30122	-1.90205	9.34e-05	-2.23216	0.00383778	-2.16568	5.31055e-05
A_23_P31765	-1.9005	0.0024332	-1.81277	0.0137171	-3.13515	0.000636608
A_23_P213766	-1.89788	0.0112667	-1.89452	0.0442381	-3.89896	0.00203217
A_23_P114075	-1.89369	0.000457254	-1.63035	0.00220727	-1.96447	0.00037205
A_32_P136662	-1.89363	0.000757461	-1.48302	0.0184444	-3.20213	0.00017946
A_32_P210572	-1.89103	0.000451469	-1.6712	0.00282037	-3.78447	4.5913e-05
A_24_P83799	-1.87021	0.000636933	-1.96336	0.00220727	-2.97764	0.000158928
A_23_P317082	-1.85806	0.000862305	-1.81699	0.00521383	-5.09551	6.71217e-05
A_24_P366033	-1.85788	0.00215633	-1.41433	0.070306	-1.95998	0.0046529
A_24_P916195	-1.83988	0.000241192	-1.27652	0.0240364	-3.18808	3.75704e-05
A_24_P363609	-1.83969	0.000451469	-1.8803	0.00141405	-3.03346	8.06e-05
A_32_P133005	-1.829	0.000443997	-1.49255	0.00875511	-1.47602	0.00598352
A_23_P141180	-1.82369	0.00262568	-1.96516	0.00618998	-3.21	0.000478471
A_23_P208369	-1.82288	0.00347739	-1.44714	0.0739466	-1.77262	0.0151397
A_23_P370684	-1.82282	0.00190024	-1.58917	0.0204932	-1.98372	0.00405964
A_23_P165162	-1.81789	0.00207026	-1.56489	0.0207604	-1.75307	0.00862452
A_24_P239578	-1.8169	0.000457254	-1.56946	0.00642071	-2.15726	0.000443654
A_32_P105465	-1.81344	0.000446773	-1.24338	0.0447951	-2.87839	8.02697e-05
A_23_P63829	-1.80983	0.00020889	-1.34226	0.00459359	-2.19251	7.64922e-05
A_23_P205686	-1.80949	0.00204645	-1.37763	0.0322928	-2.71162	0.000224068
A_32_P102745	-1.80502	0.0109615	-1.83196	0.0392878	-3.47043	0.00209431
A_24_P849319	-1.80376	0.000218907	-2.45422	0.00030273	-2.80335	4.15437e-05
A_23_P144911	-1.79104	0.00126062	-1.86647	0.00411238	-3.08032	0.000251515
A_23_P145437	-1.78755	0.00787309	-1.597	0.0440087	-3.57223	0.000647557
A_23_P103522	-1.77269	0.000462606	-1.24158	0.0443059	-1.33678	0.0134549
A_23_P89123	-1.77268	0.0145228	-1.61929	0.0799233	-2.95781	0.00356739
A_24_P457912	-1.76607	0.00127056	-1.84505	0.00447277	-2.2249	0.00103105
A_32_P30926	-1.76471	0.00906542	-1.58716	0.0599465	-1.98099	0.0159374
A_23_P329271	-1.76179	0.000903876	-1.30564	0.0623784	-1.44513	0.0171216
A_23_P201342	-1.76148	0.0444393	-2.53694	0.0312879	-5.09951	0.00326733
A_24_P264031	-1.75418	0.0242171	-1.94702	0.0468223	-5.18046	0.00111457
A_23_P200443	-1.75397	0.000554253	-1.42706	0.0105417	-1.67477	0.000771919
A_32_P69536	-1.75269	0.00190024	-2.01157	0.00373108	-3.02365	0.000385385
A_23_P54373	-1.75056	0.0607587	-2.48222	0.0413213	-4.84479	0.00488389
A_23_P375524	-1.75011	0.00284927	-1.86771	0.0081085	-2.01422	0.00379605
A_23_P35099	-1.74705	0.0151592	-1.79275	0.037239	-4.79471	0.000633334
A_32_P128773	-1.74152	0.00117443	-1.79907	0.00281837	-1.6719	0.00381818
A_32_P200697	-1.74034	0.00127992	-1.723	0.00357613	-3.30272	8.38749e-05
A_24_P42624	-1.72961	0.000256997	-1.21639	0.0135995	-1.48468	0.000647557
A_23_P50508	-1.72533	0.018063	-1.61263	0.0927858	-2.94003	0.00445866
A_24_P99679	-1.71942	0.00405083	-2.14638	0.00521383	-2.09857	0.00388963
A_32_P224157	-1.71636	0.000281385	-1.65766	0.00116081	-1.81276	0.000273207
A_24_P264004	-1.71578	0.00449362	-1.89646	0.00937886	-1.86446	0.00914712
A_23_P51136	-1.71409	0.0696825	-2.51428	0.0423274	-4.72994	0.00577725
A_23_P93623	-1.70753	0.000141488	-1.23721	0.0144389	-1.5861	0.000349926
A_23_P354288	-1.70493	0.0166605	-1.59195	0.0942636	-2.45594	0.00992587
A_23_P82795	-1.70444	0.00178506	-1.31042	0.0911425	-1.88823	0.00333069
A_24_P913819	-1.70286	0.0029977	-1.44794	0.0558727	-1.93089	0.0042309
A_24_P58647	-1.69175	0.000558757	-1.40856	0.00383778	-4.8038	1.78567e-05
A_24_P408981	-1.68839	0.00453143	-2.18151	0.00345191	-2.97714	0.000472442
A_24_P265346	-1.68772	0.00020081	-1.4311	0.00236079	-2.61379	4.47758e-05
A_23_P201179	-1.68599	0.0139272	-2.3188	0.0105185	-3.84644	0.00113276
A_23_P63896	-1.68375	0.000553621	-1.24314	0.0456548	-1.45736	0.00387265
A_23_P162982	-1.68352	0.0331952	-2.02229	0.0314601	-3.66184	0.00265777
A_23_P218918	-1.68342	0.00904413	-1.3052	0.031629	-2.61287	0.00156759
A_23_P201940	-1.6831	0.00901477	-1.93554	0.0168721	-3.21099	0.00137709
A_24_P925611	-1.68135	0.0444393	-1.97588	0.0540391	-2.22178	0.0346624
A_24_P321752	-1.68063	0.0127802	-1.49835	0.0985662	-3.10585	0.00191096
A_23_P206484	-1.68055	0.00682279	-1.70398	0.0277806	-2.37899	0.00365195
A_23_P107911	-1.67257	0.0115647	-2.28739	0.00757638	-3.14948	0.00163886
A_23_P212977	-1.6724	0.0076079	-1.47473	0.0764126	-1.52849	0.0658129
A_23_P77174	-1.65913	0.000564157	-1.1931	0.0942645	-1.83743	0.000699723
A_24_P135862	-1.65893	0.0083305	-1.5709	0.0473662	-2.16168	0.0062612
A_32_P94976	-1.65505	0.00749707	-1.36878	0.0830302	-1.64587	0.0151406
A_23_P11713	-1.65356	0.0120875	-2.21037	0.0085963	-3.31837	0.00132739
A_24_P18270	-1.64938	0.00135386	-1.30608	0.0487902	-1.82417	0.00165413
A_23_P343843	-1.64642	0.00455885	-1.37686	0.0832463	-1.77104	0.0091337
A_23_P69329	-1.64566	0.0015308	-2.1987	0.00120661	-2.52883	0.000234721
A_24_P115450	-1.6448	0.00152735	-1.46323	0.0152736	-1.28802	0.0502687
A_23_P79221	-1.64187	0.000462334	-1.36555	0.00924531	-2.16445	0.00012379
A_23_P255194	-1.64114	0.000451469	-1.2437	0.0198327	-1.7473	0.000282304
A_23_P402000	-1.63975	0.00584687	-1.69551	0.0161451	-2.30767	0.00170606
A_32_P227845	-1.63964	0.0115692	-1.57162	0.0619364	-2.22296	0.00785852
A_23_P202448	-1.63827	0.00197332	-1.28794	0.0891667	-2.70302	0.00036468
A_24_P918792	-1.63688	0.000664453	-1.56283	0.00460159	-1.67398	0.00107752
A_24_P409042	-1.63401	0.00484477	-1.74748	0.0105417	-1.43766	0.0478128
A_23_P155931	-1.63263	0.0668369	-2.38752	0.0361417	-4.82024	0.0034126
A_24_P84668	-1.63202	0.00165544	-1.67249	0.00252472	-1.7111	0.00149551
A_23_P128609	-1.63046	0.000620587	-1.50726	0.00407468	-2.31285	0.000141688
A_24_P239419	-1.62776	0.00209436	-1.19514	0.0859196	-1.59731	0.00225181
A_23_P403466	-1.62195	0.00071202	-1.29991	0.0376966	-1.50532	0.00497136
A_23_P24104	-1.6198	0.000205557	-1.21066	0.0220432	-1.48472	0.000541141
A_32_P12202	-1.61665	0.00204531	-1.44582	0.0263211	-1.51701	0.0129192
A_24_P817223	-1.61541	0.0014609	-1.52477	0.00934779	-3.13287	0.000119708
A_23_P54736	-1.6114	0.00586305	-1.8932	0.00827308	-2.49871	0.00148874
A_23_P50807	-1.61121	0.0176366	-1.55307	0.0837724	-2.34863	0.0081939
A_24_P816073	-1.60887	0.00239347	-1.30326	0.0767192	-1.29239	0.0903206
A_24_P306925	-1.60716	0.000597614	-1.18636	0.0734217	-1.93304	0.000258566
A_23_P32036	-1.60661	0.0193844	-1.69808	0.0381919	-3.14894	0.00165413
A_24_P341489	-1.60586	0.0212198	-1.76814	0.044965	-3.14703	0.00266801
A_24_P250614	-1.60564	0.0485271	-2.05938	0.0439078	-3.4361	0.00544259
A_23_P138058	-1.60472	0.0012915	-1.3457	0.0138248	-1.55037	0.00259121
A_24_P174641	-1.60355	0.00688105	-1.49681	0.0527056	-2.28058	0.00266666
A_32_P50603	-1.60346	0.00268818	-1.75804	0.00444677	-1.55148	0.00897049
A_23_P61487	-1.60316	0.0025891	-1.82485	0.00412071	-2.85904	0.000251515
A_24_P211351	-1.60209	0.00668262	-1.54582	0.0354266	-2.0817	0.00368929
A_23_P125042	-1.60201	0.00256019	-1.33795	0.0577557	-1.52187	0.015873
A_23_P393144	-1.59792	0.000271045	-2.02738	0.000440367	-2.63149	3.42693e-05
A_24_P925709	-1.59644	0.000330184	-1.56122	0.00180365	-1.74685	0.000332333
A_23_P119395	-1.59569	0.00669317	-1.4703	0.05082	-1.87663	0.00824429
A_24_P153880	-1.59433	0.00953119	-1.53999	0.0455811	-2.19159	0.00336838
A_23_P92967	-1.59352	0.00435819	-1.5341	0.0220712	-2.33106	0.00110566
A_24_P911612	-1.59288	0.00338212	-1.53133	0.0169384	-2.45217	0.000611556
A_24_P890995	-1.59042	0.000564157	-1.27958	0.0212339	-1.80718	0.000332333
A_32_P509169	-1.58952	0.0107955	-1.75563	0.0242694	-2.16273	0.00639148
A_23_P87727	-1.5873	0.00238802	-2.17694	0.00134321	-3.21458	0.000105808
A_23_P427075	-1.58596	0.00691224	-1.43671	0.0650534	-1.61237	0.0277048
A_24_P398147	-1.58441	0.00286908	-1.42213	0.0345359	-1.52139	0.0163092
A_23_P153586	-1.58418	0.000996892	-1.29611	0.0126789	-2.14765	0.000131937
A_23_P51410	-1.58305	0.00561572	-1.49606	0.0140521	-2.01159	0.00127736
A_23_P391938	-1.5815	0.00308172	-1.38669	0.0348908	-1.37637	0.028709
A_23_P154801	-1.58138	0.00867927	-1.92107	0.00948186	-1.80197	0.0112111
A_24_P194508	-1.58049	0.00788241	-1.44445	0.0638278	-1.92162	0.00782338
A_23_P47527	-1.57643	0.00197003	-2.37095	0.00081775	-3.73245	5.79583e-05
A_32_P73991	-1.57519	0.0393708	-1.73745	0.0612735	-5.26151	0.000754205
A_23_P97283	-1.57508	0.000883222	-1.32877	0.019521	-1.76457	0.000847395
A_23_P18078	-1.57029	0.00105421	-1.32806	0.0210715	-2.24139	0.000256825
A_23_P349147	-1.57011	0.00314827	-1.4216	0.0235082	-2.12243	0.000650303
A_23_P7074	-1.56943	0.00256019	-1.54815	0.0118184	-2.48256	0.000488477
A_32_P235753	-1.56928	0.0075713	-2.08211	0.00436993	-2.00253	0.00366357
A_23_P34788	-1.56915	0.00488498	-1.43094	0.0327314	-1.28819	0.0892877
A_23_P107051	-1.56806	0.0125741	-1.57807	0.0381717	-2.89202	0.00105587
A_24_P818378	-1.56741	0.00171238	-1.47757	0.00844256	-2.37549	0.000230195
A_23_P124022	-1.56738	0.0188152	-2.20499	0.00836166	-2.80784	0.00218314
A_24_P308144	-1.56672	0.015112	-1.70498	0.0171746	-4.35406	0.000234721
A_23_P126689	-1.56606	0.0572907	-2.38839	0.0213372	-4.40008	0.00211449
A_23_P103631	-1.56515	0.0749493	-2.03628	0.0584614	-4.27494	0.00358627
A_32_P135558	-1.56321	0.0387524	-1.97054	0.031081	-3.37571	0.00295417
A_23_P212284	-1.56125	0.00344203	-1.625	0.00632756	-2.05203	0.000970025
A_23_P77562	-1.56041	0.0206878	-1.81455	0.0272964	-5.31819	0.00031614
A_32_P127368	-1.55949	0.0014609	-1.27406	0.066716	-1.43218	0.0130872
A_32_P5666	-1.55641	0.0025723	-1.77781	0.00310734	-1.67765	0.00329856
A_23_P132684	-1.55376	0.000682291	-1.39163	0.0103107	-1.85529	0.00041191
A_24_P362432	-1.55158	0.0834091	-2.66934	0.0153077	-2.34693	0.0243676
A_24_P560332	-1.55146	0.0398661	-1.81972	0.0494823	-3.68557	0.00230475
A_32_P211188	-1.55116	0.00127992	-1.69518	0.00207115	-1.58563	0.00214329
A_24_P236235	-1.55049	0.0335864	-1.78858	0.0474934	-2.19296	0.0152303
A_23_P140716	-1.54721	0.000462606	-1.43732	0.00282037	-2.05564	7.64922e-05
A_24_P62883	-1.54579	0.0111632	-1.47955	0.0675959	-2.33671	0.00330894
A_32_P139260	-1.54278	0.00344775	-1.27713	0.0929439	-1.78282	0.00322376
A_24_P144773	-1.5427	0.000819865	-1.21204	0.077636	-1.76236	0.000873105
A_23_P30736	-1.5422	0.00105421	-1.49524	0.00354918	-2.5036	8.19325e-05
A_23_P96568	-1.54211	0.000457254	-1.21233	0.0337436	-2.60489	5.43603e-05
A_23_P139265	-1.53829	0.00303256	-2.22491	0.000872203	-2.82981	0.000135866
A_23_P306352	-1.53393	0.0014609	-1.37962	0.0227912	-1.39851	0.016064
A_32_P210407	-1.53339	0.00308172	-1.68445	0.0035589	-1.58424	0.00406543
A_23_P147782	-1.53143	0.0222175	-1.56777	0.0608245	-2.33357	0.00588363
A_24_P185018	-1.53043	0.00285862	-1.34059	0.0324744	-2.32903	0.000353507
A_23_P55716	-1.52983	0.00102159	-1.41909	0.0067051	-1.57564	0.00091869
A_24_P665504	-1.52867	0.000564157	-1.54529	0.00155624	-2.2205	7.64922e-05
A_23_P357966	-1.52659	0.0233679	-2.29088	0.00643037	-2.94143	0.00176251
A_24_P350186	-1.52656	0.0758939	-2.06483	0.0455811	-3.09055	0.00895335
A_23_P201628	-1.52565	0.0140849	-2.30581	0.00371751	-2.87241	0.00107018
A_23_P31477	-1.52448	0.0101648	-1.41544	0.0637444	-2.45534	0.00153862
A_23_P369960	-1.5234	0.018641	-1.86487	0.0169935	-1.50967	0.0678852
A_23_P409462	-1.52212	0.00641916	-1.65875	0.0109516	-2.05781	0.0019469
A_23_P404536	-1.51573	0.00188027	-1.28271	0.0378641	-3.14185	6.6024e-05
A_23_P145480	-1.51536	0.0189399	-2.32703	0.00506821	-2.88786	0.00159738
A_24_P250666	-1.51234	0.00102159	-1.23787	0.0290472	-2.17453	0.000103035
A_23_P257905	-1.51219	0.0249462	-1.58038	0.0505065	-3.32787	0.00102673
A_23_P37275	-1.51202	0.0137682	-2.27018	0.00410979	-2.74778	0.00134382
A_23_P117580	-1.51062	0.0058585	-1.37215	0.0375021	-1.77381	0.00296975
A_24_P247699	-1.51057	0.0284183	-1.93193	0.0164835	-3.54932	0.000964706
A_24_P79054	-1.50971	0.0197178	-2.04676	0.00968012	-2.72471	0.00180998
A_23_P35330	-1.50915	0.010246	-2.28322	0.00290488	-2.91563	0.00067971
A_23_P40926	-1.50723	0.0015308	-1.2469	0.0435592	-2.18985	0.000243472
A_24_P681563	-1.50263	0.0014389	-1.23794	0.0307248	-1.21108	0.0492411
A_32_P49654	-1.50133	0.000564157	-1.39337	0.00672838	-1.67581	0.000508115
A_23_P118042	-1.50126	0.0247748	-2.31276	0.00650047	-2.92766	0.00191352
A_24_P109417	-1.49963	0.000749531	-1.14943	0.0608245	-1.5299	0.000695142
A_23_P90311	-1.49906	0.0105516	-2.02246	0.0056044	-2.61201	0.00123144
A_23_P62406	-1.49845	0.0035754	-1.24666	0.0967635	-1.72569	0.00311107
A_24_P279520	-1.49774	0.00231593	-1.72445	0.00371886	-1.5372	0.00586386
A_23_P43690	-1.49597	0.00245253	-1.47189	0.00805212	-1.91911	0.000485251
A_24_P221551	-1.49338	0.0177819	-1.54868	0.0455344	-1.45588	0.0723526
A_24_P926189	-1.49312	0.00672875	-1.66264	0.00818551	-3.38354	0.000126328
A_23_P112531	-1.49005	0.0027394	-1.34373	0.0426669	-1.71017	0.00240455
A_23_P37244	-1.48969	0.00517902	-2.26587	0.000944867	-2.42395	0.000307465
A_32_P53558	-1.48926	0.0746813	-1.74874	0.0752625	-2.20193	0.0236311
A_23_P347541	-1.48614	0.0133938	-1.6443	0.0233766	-1.62704	0.0247971
A_23_P24870	-1.48478	0.0014609	-1.45237	0.00659829	-2.97952	5.31055e-05
A_24_P325533	-1.4843	0.00748772	-1.38623	0.0366285	-2.39313	0.000515382
A_32_P175934	-1.48284	0.000426301	-1.21427	0.0244174	-2.76629	2.9878e-05
A_32_P185718	-1.48024	0.00489215	-1.49478	0.0201145	-2.86051	0.000317643
A_23_P135966	-1.47997	0.00608874	-1.62355	0.0113711	-2.20423	0.00126656
A_23_P23996	-1.47925	0.0458069	-1.60752	0.0834541	-2.61079	0.00667624
A_23_P129903	-1.4769	0.019812	-2.32263	0.00426461	-2.82324	0.00139936
A_32_P55427	-1.47689	0.028934	-1.5831	0.0599077	-2.326	0.00640077
A_24_P341006	-1.4754	0.00515871	-1.53294	0.0121683	-2.09401	0.00101682
A_24_P920409	-1.47435	0.00627195	-1.73804	0.00710073	-1.84067	0.00348462
A_24_P393303	-1.47189	0.010246	-1.41744	0.0592736	-1.5263	0.030623
A_23_P368691	-1.47154	0.0051096	-1.52348	0.0149512	-2.15496	0.000985253
A_24_P150149	-1.4689	0.00527616	-1.41997	0.028426	-2.32779	0.00062951
A_23_P33539	-1.46708	0.0150675	-1.70606	0.0105003	-2.77344	0.000601574
A_24_P67618	-1.46654	0.0190915	-1.55018	0.0410949	-2.34099	0.00263506
A_24_P943815	-1.46554	0.000717373	-1.30863	0.0097319	-1.98182	0.000105808
A_23_P407080	-1.46391	0.00522369	-1.56353	0.0109516	-1.53585	0.0115146
A_23_P365081	-1.46298	0.00210277	-1.94001	0.00139886	-2.12605	0.000311138
A_23_P30024	-1.46218	0.0767001	-1.63492	0.00717345	-1.50794	0.00105159
A_23_P152873	-1.46137	0.00995236	-1.70255	0.00650073	-3.41836	0.000135866
A_23_P162640	-1.45937	0.0149633	-1.35827	0.0694295	-3.03234	0.00041191
A_32_P50846	-1.45816	0.00338196	-1.25054	0.078131	-1.58311	0.00575985
A_32_P221624	-1.45504	0.00621143	-1.90546	0.00253307	-2.51517	0.000321831
A_24_P641673	-1.45401	0.0812084	-1.80248	0.0588335	-2.48187	0.0124597
A_24_P205074	-1.45306	0.0540518	-1.75757	0.0474934	-1.8541	0.0367924
A_23_P502470	-1.45103	0.0010126	-1.25033	0.017944	-3.75268	1.78567e-05
A_23_P170427	-1.45081	0.0175513	-1.77545	0.0132528	-3.56765	0.000341939
A_24_P282031	-1.44893	0.00087721	-1.48117	0.00115374	-1.93813	8.19325e-05
A_23_P431430	-1.44743	0.000883222	-1.13133	0.0682062	-1.59361	0.000332333
A_23_P164507	-1.44666	0.020572	-1.62383	0.0283905	-1.92125	0.00580153
A_23_P17269	-1.44639	0.00220538	-1.46452	0.023169	-1.86203	0.00307643
A_23_P22625	-1.44582	0.0083381	-1.51216	0.0192802	-3.21966	0.00023865
A_24_P76675	-1.44566	0.0583663	-1.7132	0.0548876	-1.84436	0.0394762
A_24_P923629	-1.44547	0.00232422	-1.29813	0.0249016	-1.64921	0.00121889
A_32_P233091	-1.44297	0.00343369	-1.23338	0.0812892	-1.66074	0.00250503
A_23_P141342	-1.44122	0.0675701	-1.74231	0.0559869	-2.03501	0.0251274
A_32_P494790	-1.43793	0.00691224	-1.73198	0.00684712	-1.57241	0.0106359
A_23_P120504	-1.43782	0.00555922	-1.4918	0.0225718	-1.73391	0.00431719
A_23_P48339	-1.43712	0.000693385	-1.18114	0.037239	-1.83078	9.24162e-05
A_23_P375494	-1.43652	0.0327546	-1.65548	0.0398432	-1.57749	0.0568904
A_23_P117302	-1.43607	0.0356791	-1.90142	0.0140014	-3.56623	0.000712089
A_23_P63432	-1.43482	0.0210574	-1.4294	0.0698987	-1.71986	0.0121209
A_32_P42197	-1.4336	0.0488992	-1.54358	0.0904639	-2.51386	0.00609779
A_24_P786025	-1.43298	0.000530834	-1.35842	0.00447277	-1.57827	0.000360588
A_24_P196774	-1.43254	0.00359544	-1.62648	0.0044136	-1.54939	0.00411108
A_23_P46903	-1.43172	0.00141625	-1.62235	0.000695942	-1.52834	0.00036468
A_23_P379736	-1.42997	0.00117253	-1.49516	0.00263556	-2.60305	4.5913e-05
A_32_P126183	-1.42964	0.0154789	-1.72686	0.0132499	-1.63622	0.0198857
A_24_P202558	-1.42896	0.00297273	-1.2353	0.0838805	-2.04525	0.000649477
A_24_P58477	-1.4281	0.0101452	-1.56111	0.0189176	-2.16609	0.00176004
A_23_P108103	-1.4269	0.0127867	-1.66145	0.0140534	-1.59591	0.0172128
A_23_P325862	-1.42462	0.00891703	-1.56206	0.016564	-1.51595	0.0170311
A_23_P164179	-1.42232	0.0195322	-1.70611	0.0132672	-1.73822	0.0101494
A_23_P79703	-1.42185	0.00109774	-1.44167	0.00308631	-2.49217	4.52827e-05
A_23_P133216	-1.42108	0.000614704	-1.31018	0.00616071	-1.63742	0.000321831
A_24_P842002	-1.41689	0.0294521	-1.45115	0.076517	-2.33251	0.00356739
A_23_P156807	-1.41291	0.00253446	-1.28999	0.0357399	-2.00861	0.000474175
A_23_P251868	-1.41274	0.0863598	-2.10182	0.0205797	-3.52318	0.00226809
A_23_P36757	-1.41117	0.0120633	-1.46979	0.0296192	-1.6517	0.00930979
A_24_P670475	-1.41069	0.0202679	-1.64012	0.022303	-1.91276	0.00736023
A_24_P926576	-1.41042	0.0376154	-1.60569	0.04309	-2.62701	0.00225189
A_24_P932710	-1.40962	0.0115479	-1.40269	0.0426669	-1.79657	0.00504214
A_23_P85682	-1.40881	0.0132763	-1.64131	0.00784821	-1.50147	0.0165399
A_23_P311875	-1.4058	0.00246129	-1.38613	0.0060045	-1.91382	0.000209955
A_23_P156852	-1.40446	0.00641104	-1.43056	0.0178944	-2.42323	0.000247325
A_24_P940396	-1.40385	0.0516181	-2.02295	0.0109516	-1.58797	0.0418465
A_24_P78590	-1.40235	0.00823211	-1.53484	0.0143658	-1.5059	0.0175229
A_32_P92101	-1.40221	0.0098457	-1.88145	0.0027475	-2.30337	0.000610824
A_23_P5089	-1.40216	0.0488992	-1.53311	0.073385	-2.52983	0.00305761
A_23_P435904	-1.40138	0.0170232	-1.54727	0.0247204	-1.49073	0.0366126
A_24_P205105	-1.40108	0.0210179	-1.64326	0.0109447	-1.603	0.0115271
A_24_P704446	-1.40087	0.0164782	-1.58777	0.0143658	-1.38635	0.0457257
A_23_P56091	-1.39885	0.0767197	-1.72732	0.0556066	-2.46423	0.00908405
A_23_P34554	-1.39704	0.01337	-1.29488	0.0995983	-1.54932	0.0173176
A_23_P70213	-1.39671	0.0147919	-2.01011	0.0026055	-1.83909	0.00254082
A_32_P98496	-1.39536	0.000918238	-1.75135	0.000831643	-2.53933	5.31055e-05
A_24_P16470	-1.39484	0.00288768	-1.23189	0.0681584	-2.18925	0.00032259
A_23_P41390	-1.39395	0.0160232	-1.61096	0.0150819	-3.28043	0.000278787
A_32_P79610	-1.39254	0.0015308	-1.38345	0.00663013	-1.50862	0.00176251
A_23_P133315	-1.39126	0.0853763	-1.58715	0.0894188	-1.7784	0.0511699
A_23_P433760	-1.38594	0.0111862	-1.29677	0.079543	-1.67817	0.00586386
A_32_P170178	-1.38542	0.00284927	-1.64858	0.00198073	-2.8237	6.84691e-05
A_32_P30630	-1.38499	0.00562351	-1.99508	0.00168551	-1.86702	0.00121777
A_24_P315862	-1.3847	0.026375	-1.6953	0.0163149	-2.4539	0.00165413
A_23_P206501	-1.38249	0.0410748	-1.6169	0.0412541	-2.13228	0.00660202
A_23_P593	-1.38163	0.0222175	-1.52284	0.0307248	-1.56601	0.0209926
A_24_P548264	-1.38161	0.00583632	-1.24958	0.0765673	-1.9995	0.000730144
A_23_P131111	-1.38028	0.00638415	-1.36841	0.0312352	-2.01975	0.000931204
A_32_P187851	-1.37968	0.0118793	-1.6876	0.0067051	-2.31856	0.000730144
A_23_P35467	-1.37601	0.0027356	-1.18817	0.0553729	-1.69936	0.000602457
A_23_P406644	-1.37578	0.0306464	-1.5677	0.0380732	-1.76779	0.0152783
A_23_P212870	-1.37398	0.0217998	-1.73621	0.0119391	-1.60528	0.0192968
A_24_P196851	-1.37373	0.0694689	-1.64244	0.0609261	-1.55283	0.0914888
A_32_P97506	-1.37336	0.00198166	-1.18382	0.0670674	-2.46431	8.00578e-05
A_23_P11764	-1.37293	0.0100117	-1.32866	0.0324605	-1.84651	0.00135855
A_23_P369994	-1.37268	0.0101452	-1.74038	0.00496531	-2.23693	0.000636073
A_23_P111141	-1.37167	0.0189503	-1.44956	0.0400894	-1.51893	0.0244943
A_24_P76854	-1.37146	0.0152238	-1.40914	0.0383765	-1.51019	0.0207079
A_23_P74887	-1.36852	0.0156879	-1.69232	0.0068933	-1.33156	0.0461822
A_24_P232809	-1.36692	0.0348967	-1.49118	0.0489935	-1.87974	0.00928249
A_23_P211363	-1.36646	0.0349619	-1.42234	0.0694295	-1.89342	0.00695787
A_23_P304304	-1.36515	0.00759071	-1.25379	0.0827472	-1.5977	0.00560032
A_23_P106016	-1.36332	0.00635832	-1.2037	0.0926207	-2.28041	0.000185163
A_24_P65803	-1.36249	0.042225	-1.71191	0.0186054	-2.05152	0.00405872
A_24_P11142	-1.36202	0.00231355	-1.28911	0.0138382	-2.08603	0.000151915
A_23_P26810	-1.36188	0.0197786	-1.17842	0.0774705	-2.45799	0.000844548
A_24_P37020	-1.35929	0.0863598	-1.56944	0.0827472	-2.12466	0.0142676
A_23_P106727	-1.35802	0.020328	-1.66178	0.0126831	-1.79338	0.00542516
A_23_P155057	-1.35701	0.045086	-1.70266	0.0252349	-1.44337	0.0864294
A_23_P86550	-1.35482	0.0357829	-2.0185	0.0066731	-2.29326	0.00285328
A_32_P205139	-1.35468	0.0136687	-1.54647	0.0125427	-2.53565	0.000288763
A_32_P30187	-1.3541	0.0515054	-1.41364	0.0980604	-2.33174	0.00379016
A_24_P264383	-1.35047	0.0536187	-1.929	0.0138579	-1.65209	0.0335198
A_24_P715719	-1.34961	0.0157391	-1.31142	0.0885566	-1.76099	0.00395018
A_23_P149613	-1.34852	0.0060471	-1.64555	0.00291477	-1.72893	0.00144816
A_32_P45462	-1.34797	0.00602486	-1.34292	0.0126905	-3.3723	5.31055e-05
A_24_P46159	-1.34796	0.0455057	-1.64255	0.0211525	-1.39951	0.0777504
A_24_P64362	-1.34741	0.0207939	-1.58489	0.0149028	-2.12356	0.0015258
A_23_P91095	-1.34696	0.0400018	-1.4375	0.0569922	-1.54299	0.0311446
A_23_P148798	-1.34657	0.00172569	-1.39776	0.00390386	-2.08125	7.79259e-05
A_23_P156209	-1.34376	0.00698646	-1.56069	0.00502846	-2.75572	8.19325e-05
A_32_P174130	-1.34316	0.00614815	-1.22	0.0679422	-1.82716	0.000844047
A_32_P228438	-1.34048	0.0448472	-1.91092	0.00851917	-2.72098	0.00112911
A_24_P938597	-1.34038	0.00586305	-1.51176	0.00760228	-1.63337	0.00237233
A_23_P7313	-1.33867	0.00597968	-1.24027	0.0442807	-2.93718	5.79583e-05
A_23_P201538	-1.33752	0.019792	-1.46177	0.0257736	-2.36128	0.000813122
A_23_P163955	-1.33749	0.0103169	-1.66925	0.00744568	-1.641	0.00515628
A_24_P867342	-1.33635	0.00870272	-1.60038	0.00797786	-1.44786	0.0126587
A_24_P673063	-1.33421	0.0487518	-1.46601	0.0620196	-3.62779	0.000394022
A_32_P213210	-1.33307	0.014034	-1.30306	0.0562426	-2.29775	0.000558341
A_24_P71468	-1.33238	0.00608874	-1.38582	0.0151991	-1.60295	0.00243886
A_23_P392544	-1.33167	0.00583398	-1.5626	0.00354918	-1.58362	0.00254068
A_24_P93931	-1.33083	0.0199791	-1.3123	0.0752521	-2.05696	0.00161175
A_23_P385690	-1.33066	0.0100214	-1.2349	0.061617	-1.80121	0.00103808
A_32_P217390	-1.33006	0.00621143	-1.44073	0.00746526	-1.50966	0.00371891
A_32_P231346	-1.32864	0.0733479	-1.59174	0.0557476	-2.16842	0.00798405
A_32_P121834	-1.32797	0.00408364	-1.28272	0.0175097	-1.70239	0.000405791
A_23_P371758	-1.32791	0.0393806	-1.37209	0.0873931	-1.52732	0.0331057
A_24_P156886	-1.325	0.00377495	-1.31476	0.0118184	-1.75039	0.000288763
A_23_P422350	-1.32489	0.014848	-1.32999	0.0408934	-1.9153	0.00144709
A_32_P104617	-1.32475	0.00770802	-1.50935	0.00847513	-1.4411	0.0110853
A_32_P134788	-1.32294	0.0815053	-1.59299	0.0607327	-1.91193	0.0181528
A_23_P210872	-1.32249	0.0125334	-1.54217	0.00696412	-1.65963	0.00234927
A_23_P424710	-1.32244	0.00428314	-1.42521	0.0068933	-1.70792	0.000800783
A_23_P8497	-1.32214	0.0156199	-1.70098	0.00305787	-3.82963	5.79583e-05
A_23_P74269	-1.32208	0.012062	-1.34405	0.026157	-2.22325	0.000347768
A_24_P376848	-1.32154	0.097717	-1.50497	0.0948295	-1.8103	0.0312454
A_23_P253524	-1.31835	0.00550696	-1.60888	0.00193697	-1.40776	0.00347433
A_32_P2452	-1.31764	0.00255004	-1.29725	0.0077993	-1.78953	0.000145947
A_24_P123768	-1.31734	0.0281947	-1.52079	0.022937	-1.35992	0.071819
A_24_P77219	-1.31733	0.0414884	-1.63895	0.0124332	-1.68279	0.00726652
A_24_P912490	-1.31658	0.00192917	-1.26073	0.0105417	-1.65453	0.000224499
A_24_P674924	-1.31585	0.0188861	-1.39043	0.0286792	-1.52648	0.00970864
A_32_P112970	-1.31535	0.0198279	-1.26305	0.0951202	-3.15017	0.00017946
A_23_P48513	-1.31085	0.00225535	-1.39989	0.00447277	-1.61027	0.00335442
A_32_P215100	-1.31023	0.0028363	-1.24034	0.0196642	-2.00406	0.000131937
A_23_P218215	-1.30988	0.00804884	-1.68673	0.00249647	-1.39497	0.0107344
A_23_P431776	-1.30918	0.00292758	-1.2398	0.0414253	-1.81632	0.000402678
A_23_P13907	-1.30815	0.0308692	-1.47493	0.00533112	-1.76563	0.00058962
A_32_P134772	-1.30688	0.0705576	-2.30414	0.00345191	-2.9649	0.000846635
A_24_P239302	-1.30625	0.0420007	-1.50541	0.0357399	-1.44617	0.0441749
A_23_P368101	-1.30598	0.0028033	-1.38773	0.00249647	-1.62168	0.000334027
A_24_P555473	-1.30572	0.033916	-1.37798	0.0584614	-1.74986	0.00781327
A_24_P917384	-1.30449	0.00339088	-1.50427	0.00223122	-1.38503	0.00279635
A_32_P10403	-1.30332	0.0391201	-1.41399	0.0434196	-2.45651	0.000888917
A_32_P198584	-1.30288	0.023703	-1.83338	0.00282037	-2.51248	0.000298507
A_23_P114649	-1.30237	0.0611593	-1.90215	0.0095108	-1.59621	0.0330684
A_23_P75800	-1.30092	0.0274226	-1.43974	0.0344063	-1.64625	0.0107578
A_23_P207999	-1.29959	0.018558	-1.39879	0.0357601	-3.96125	0.00283508
A_32_P360193	-1.29947	0.00324058	-1.23773	0.0204826	-1.56818	0.000477125
A_24_P182182	-1.29867	0.0122625	-1.61605	0.00258055	-2.11077	0.000284904
A_24_P903460	-1.29743	0.0153861	-1.57196	0.00768198	-1.72016	0.00243496
A_32_P181891	-1.29648	0.0256942	-1.48037	0.0186686	-3.05518	0.000212424
A_23_P215790	-1.29544	0.0469471	-1.76444	0.0271942	-3.82554	0.000233729
A_23_P151459	-1.29366	0.0118793	-1.24207	0.0825957	-3.18297	8.38749e-05
A_23_P257578	-1.2933	0.0154833	-1.29202	0.0380814	-1.72923	0.00175081
A_24_P4661	-1.29311	0.00726235	-1.16709	0.0994246	-3.26187	3.42693e-05
A_24_P270829	-1.29107	0.00264701	-1.16524	0.0620196	-1.67989	0.000371789
A_23_P329727	-1.29033	0.00288768	-1.64027	0.00137906	-2.08213	0.00010338
A_24_P11384	-1.28965	0.0136366	-1.87727	0.00157639	-1.47548	0.0070143
A_32_P187349	-1.2879	0.00431254	-1.31005	0.00906579	-1.83898	0.000145862
A_23_P303891	-1.28753	0.0090518	-1.41316	0.0095108	-1.58204	0.00250503
A_32_P201041	-1.28502	0.00303038	-1.20691	0.0360046	-1.90232	0.000207202
A_23_P255637	-1.28442	0.0335707	-1.3452	0.0607349	-1.81922	0.00395417
A_23_P120776	-1.28425	0.00804884	-1.16782	0.0495012	-1.89465	0.000158801
A_24_P153803	-1.28364	0.00957937	-1.43938	0.00785032	-1.51828	0.0033762
A_24_P647163	-1.28111	0.0730453	-1.55334	0.0220646	-2.04472	0.00294931
A_23_P8363	-1.27766	0.0417444	-2.09222	0.00240962	-2.60013	0.000451434
A_23_P358564	-1.2772	0.00595849	-1.31673	0.0171221	-2.25643	0.000160967
A_23_P137573	-1.27652	0.0250795	-2.0043	0.00184698	-1.82067	0.00210158
A_23_P218608	-1.27368	0.0728147	-1.78218	0.0306432	-1.8825	0.00487727
A_32_P215714	-1.27347	0.0311763	-1.61271	0.00818322	-1.95921	0.0014578
A_23_P254801	-1.27254	0.00320482	-1.17831	0.0367792	-1.90626	8.06e-05
A_24_P482592	-1.27183	0.00229161	-1.14486	0.0819498	-1.96088	9.0937e-05
A_23_P363149	-1.26909	0.0551049	-1.612	0.00746526	-2.29441	0.000602404
A_23_P15247	-1.26755	0.0589497	-1.37068	0.078488	-1.77937	0.00826103
A_24_P334378	-1.26576	0.0539848	-1.39867	0.0593466	-1.78434	0.0080784
A_24_P340474	-1.26426	0.0158231	-1.37415	0.0209208	-2.78763	0.000135866
A_23_P396832	-1.26336	0.0439401	-1.29882	0.09132	-1.6472	0.00613906
A_32_P184518	-1.26296	0.0136489	-1.55089	0.00323839	-2.48287	8.3923e-05
A_24_P579826	-1.2626	0.0105516	-1.21585	0.0612879	-1.76531	0.000771525
A_23_P83289	-1.26234	0.0826136	-1.67768	0.016564	-2.09155	0.00323227
A_24_P208567	-1.26109	0.0234895	-1.45261	0.0109153	-1.62388	0.0023979
A_24_P320171	-1.26083	0.0140849	-1.33496	0.0174035	-1.69606	0.00131988
A_32_P13565	-1.26036	0.0118782	-1.62164	0.00240962	-1.38602	0.00802107
A_32_P157124	-1.26034	0.0107566	-1.26258	0.0273629	-1.54388	0.00144816
A_32_P2844	-1.25995	0.0699705	-1.62919	0.0152736	-1.67317	0.0086691
A_23_P215625	-1.259	0.0230133	-1.25171	0.0757195	-1.89666	0.00101784
A_23_P334083	-1.25897	0.0536405	-1.45327	0.0402356	-1.87954	0.00451279
A_32_P163247	-1.2577	0.090909	-1.43052	0.0693842	-1.50889	0.044951
A_32_P170368	-1.25707	0.0664894	-1.35302	0.0877716	-2.66707	0.000916924
A_23_P57036	-1.25685	0.00781377	-1.24762	0.0154363	-1.57981	0.00067013
A_23_P170839	-1.2564	0.00905655	-1.29664	0.01283	-1.67234	0.000485251
A_32_P306678	-1.2561	0.00447575	-1.22481	0.0242853	-1.6348	0.000299024
A_23_P98898	-1.25538	0.0309254	-1.49237	0.01056	-1.71627	0.00276809
A_24_P375819	-1.25501	0.00533853	-1.27329	0.00797786	-1.54016	0.000586832
A_23_P774	-1.25444	0.0498541	-1.86008	0.00349947	-1.5255	0.0128456
A_23_P415806	-1.25405	0.0244354	-1.30786	0.0351108	-1.79912	0.000840235
A_24_P699252	-1.25298	0.00646503	-1.34102	0.00811359	-1.5377	0.00074298
A_24_P202769	-1.25182	0.00819055	-1.31128	0.0119962	-1.67942	0.000521148
A_23_P363203	-1.25084	0.00638415	-1.19342	0.0318613	-1.60384	0.000442357
A_24_P542375	-1.25033	0.042818	-1.60768	0.0074551	-2.26848	0.000523353
A_24_P273114	-1.2487	0.0232044	-2.02255	0.000897531	-1.93183	0.000560311
A_23_P332789	-1.24837	0.0690219	-1.59301	0.0191085	-2.19462	0.00175367
A_24_P35478	-1.24821	0.0119699	-1.24031	0.0392076	-2.25906	0.00016873
A_23_P137751	-1.24778	0.0716231	-1.72783	0.00879915	-1.47181	0.0285
A_24_P752416	-1.24761	0.0116621	-1.2849	0.0336427	-1.76342	0.00101682
A_32_P133780	-1.24721	0.0118781	-1.251	0.0501323	-1.64094	0.00126816
A_24_P314962	-1.24498	0.00867927	-1.37531	0.00594813	-1.71269	0.000307978
A_24_P14328	-1.24385	0.0118793	-1.24478	0.0472369	-2.13137	0.000240763
A_24_P891276	-1.24156	0.00473397	-1.34605	0.0067792	-1.53192	0.000769784
A_24_P65779	-1.24128	0.00904413	-1.12693	0.0648305	-1.76115	0.000132524
A_23_P67072	-1.23924	0.0157722	-1.62174	0.00148504	-2.82072	5.79583e-05
A_23_P397341	-1.23913	0.0106445	-1.30801	0.0141004	-1.64058	0.000653141
A_23_P41314	-1.23907	0.028674	-1.24822	0.0685663	-1.85924	0.000755127
A_23_P57927	-1.23848	0.0123039	-1.32429	0.0175358	-2.11631	0.000234454
A_32_P158355	-1.23828	0.0206714	-1.67873	0.00245617	-2.84039	0.000100459
A_23_P11729	-1.23758	0.00414795	-1.1558	0.0553165	-1.66439	0.0001803
A_23_P54144	-1.23372	0.0225274	-1.78405	0.00156676	-1.87539	0.000601574
A_24_P481411	-1.23304	0.0352728	-1.55363	0.00760228	-1.71832	0.00282635
A_23_P86133	-1.23196	0.00925935	-1.50039	0.0035589	-1.49994	0.00224818
A_24_P481431	-1.23149	0.00726235	-1.1771	0.0252592	-1.91924	8.38749e-05
A_24_P911648	-1.23101	0.00789518	-1.16222	0.0794417	-2.21003	7.79589e-05
A_23_P346309	-1.23076	0.0493517	-1.75239	0.00457792	-1.97125	0.001395
A_24_P658584	-1.23074	0.0356127	-1.50259	0.0161451	-1.45077	0.0158387
A_32_P17343	-1.23073	0.00613496	-1.21685	0.0314091	-1.56988	0.000761524
A_24_P306905	-1.2299	0.0310144	-1.26965	0.0403397	-1.53718	0.00403369
A_23_P144726	-1.22924	0.0614182	-1.92924	0.00283233	-1.56305	0.00944389
A_23_P141389	-1.2289	0.0948726	-1.96899	0.00415343	-1.72615	0.00878613
A_23_P165608	-1.22869	0.00927338	-1.16554	0.069201	-2.11265	8.91546e-05
A_23_P204277	-1.22725	0.0177308	-1.1842	0.0962668	-1.88842	0.000474175
A_32_P466877	-1.22445	0.0380335	-1.42186	0.0163289	-1.8862	0.00108078
A_23_P82588	-1.22442	0.0152663	-1.60046	0.00210599	-1.49127	0.00148799
A_23_P163278	-1.22288	0.00738241	-1.16254	0.0634005	-2.02463	0.000105808
A_24_P85117	-1.22229	0.037586	-1.25381	0.0467861	-1.76734	0.00111163
A_32_P220762	-1.22184	0.0981363	-1.38035	0.0827472	-1.75253	0.00872384
A_32_P75559	-1.22137	0.0537539	-1.30638	0.0648305	-1.70722	0.00417601
A_23_P113777	-1.21943	0.0880242	-1.5072	0.0259385	-1.47824	0.0260434
A_23_P125829	-1.21146	0.0159989	-1.22369	0.073385	-1.54284	0.00177714
A_23_P144005	-1.21035	0.0597361	-1.27836	0.0911674	-1.84942	0.00198335
A_23_P30976	-1.20994	0.0668066	-1.33307	0.0540493	-1.74065	0.00424924
A_24_P348173	-1.20986	0.0101452	-1.55907	0.00129009	-2.05634	7.22331e-05
A_23_P209519	-1.20882	0.0438024	-1.27165	0.0681584	-1.82729	0.00163478
A_24_P258277	-1.20566	0.0809007	-1.50691	0.0152736	-2.31339	0.000526681
A_24_P82848	-1.20207	0.0340068	-1.50487	0.00682853	-1.78599	0.00128459
A_23_P25873	-1.20096	0.00806553	-1.28834	0.00726117	-1.50109	0.000737064
A_23_P99891	-1.20032	0.095073	-1.6067	0.0113256	-1.45238	0.0254862
A_32_P114831	-1.19863	0.0104779	-1.12412	0.0863049	-1.77644	0.000138162
A_24_P933492	-1.19714	0.0331301	-1.25641	0.028139	-1.50539	0.00209036
A_23_P141092	-1.1958	0.0185025	-1.37435	0.00558586	-1.78261	0.000302407
A_23_P321160	-1.19422	0.0712367	-1.57985	0.00830497	-2.22823	0.000402486
A_24_P556883	-1.19225	0.0354073	-1.52589	0.00558586	-1.47334	0.00640077
A_23_P406508	-1.19191	0.061258	-1.35435	0.017999	-2.03277	0.000398366
A_32_P91902	-1.19141	0.0438041	-1.34467	0.023169	-1.75109	0.00157618
A_23_P373649	-1.1914	0.0726334	-1.27371	0.0460422	-2.52726	0.000197803
A_24_P256830	-1.19025	0.0208742	-1.14645	0.0556066	-1.63086	0.000315483
A_23_P69242	-1.18966	0.0784084	-1.5205	0.0104828	-1.2824	0.059297
A_23_P128319	-1.18822	0.0716942	-1.28373	0.0579286	-3.07668	0.000104122
A_23_P166548	-1.18736	0.0670478	-1.27932	0.0682248	-1.52536	0.00895335
A_24_P53778	-1.1869	0.0258304	-1.47602	0.00296009	-1.6492	0.000523202
A_24_P102091	-1.18595	0.0925465	-1.50865	0.0186539	-1.33844	0.0532821
A_24_P397817	-1.18593	0.0367634	-1.37654	0.0485093	-1.84368	0.000489565
A_32_P173922	-1.18562	0.031838	-1.31747	0.0180289	-1.52185	0.00266186
A_24_P122137	-1.18487	0.0728255	-1.41319	0.0212522	-1.64305	0.00423226
A_23_P115375	-1.18442	0.0347459	-1.25996	0.0353876	-2.01865	0.000347768
A_32_P232523	-1.18365	0.0545391	-1.62692	0.00349947	-1.24694	0.0590087
A_23_P167711	-1.18326	0.0835947	-1.66804	0.00406145	-1.87319	0.00110801
A_23_P217611	-1.18313	0.0897861	-1.28719	0.0713163	-1.66736	0.0050018
A_23_P132863	-1.18298	0.0394821	-1.4551	0.00236079	-1.51062	0.0010708
A_32_P932089	-1.1815	0.0786453	-1.38838	0.0257607	-1.95122	0.0011838
A_24_P347411	-1.17826	0.0147237	-1.32456	0.00471729	-3.19387	1.78567e-05
A_24_P357933	-1.17675	0.0279819	-1.65667	0.000695942	-1.3469	0.00231262
A_32_P226858	-1.17639	0.0879719	-1.35552	0.0257706	-1.51726	0.00679973
A_24_P398781	-1.17564	0.0352728	-1.28676	0.0191911	-1.9135	0.000234454
A_23_P340312	-1.17517	0.0403046	-1.40243	0.00696412	-1.95999	0.000284628
A_24_P185484	-1.16983	0.0212659	-1.21462	0.0171085	-1.82451	0.000145947
A_23_P256131	-1.16833	0.0305729	-1.711	0.00100094	-1.3689	0.00288632
A_23_P138289	-1.16449	0.0542365	-1.17865	0.098059	-1.52256	0.00240665
A_23_P138826	-1.16448	0.086081	-1.2868	0.044994	-1.53179	0.0042488
A_24_P218074	-1.16361	0.0398503	-1.53868	0.00308689	-2.27145	0.000105808
A_23_P53126	-1.16317	0.0458569	-1.26612	0.0467546	-2.20946	0.000256825
A_23_P122674	-1.15631	0.0690219	-1.44967	0.0243892	-1.58077	0.00208416
A_24_P642328	-1.15396	0.0806073	-1.69082	0.00204897	-2.68123	7.64922e-05
A_24_P385205	-1.15165	0.0888759	-1.48718	0.00850756	-1.51208	0.00569846
A_23_P55319	-1.15005	0.0537799	-1.23873	0.0536477	-1.71882	0.00076877
A_32_P90709	-1.13768	0.0721699	-1.51276	0.00457535	-1.48044	0.00391326
A_32_P758538	-1.12376	0.0813885	-1.26657	0.0307248	-1.57783	0.00129934
A_23_P203318	-1.12041	0.0966769	-1.2476	0.0295403	-1.70839	0.000703876
A_23_P374294	-1.10692	0.0770398	-1.79705	0.000695942	-1.5835	0.000442357
A_24_P247978	-1.10581	0.0952622	-1.33176	0.00469675	-1.78611	0.000147239
A_24_P652786	1.10171	0.065368	1.2416	0.0135995	1.5549	0.000526681
A_23_P168864	1.10433	0.0985873	1.24237	0.0321295	1.64119	0.000712089
A_32_P196837	1.10467	0.0870637	1.67428	0.000872203	1.87975	0.000129425
A_32_P41173	1.10772	0.0981363	1.64823	0.00157639	1.38931	0.00350239
A_23_P66306	1.11598	0.0900597	1.75503	0.00081775	1.5326	0.000864972
A_23_P105873	1.11616	0.0910749	1.4926	0.00184698	2.35199	6.12928e-05
A_23_P200685	1.12135	0.0751982	1.5435	0.00308631	1.78498	0.000559493
A_24_P242204	1.12141	0.0751021	1.16712	0.0522791	1.52675	0.000895081
A_32_P181527	1.126	0.0844675	1.25347	0.0201096	1.69642	0.000538543
A_23_P79993	1.12761	0.0893874	1.49682	0.00429265	1.78002	0.000500363
A_23_P45811	1.13191	0.0340536	1.42724	0.00314034	1.77661	0.000233736
A_24_P252043	1.13302	0.0300482	1.53745	0.00219646	1.34735	0.00421956
A_23_P500000	1.13529	0.0793818	1.19652	0.0740328	2.33833	0.000151915
A_23_P1691	1.13631	0.0744094	1.2394	0.0569214	1.53573	0.00227412
A_23_P377197	1.13726	0.0960433	1.5253	0.00304507	1.42731	0.00496666
A_23_P101699	1.138	0.0819544	1.31583	0.0294487	1.62001	0.00218377
A_23_P8571	1.13906	0.0387108	1.18203	0.0487363	1.87356	0.000131937
A_23_P10385	1.14051	0.0446071	1.36051	0.0447369	1.63049	0.000351229
A_23_P398275	1.14158	0.0487014	1.35397	0.00935351	1.56062	0.00101682
A_24_P734268	1.14182	0.0774229	1.36147	0.0156167	1.95263	0.000469518
A_24_P85881	1.14208	0.085768	1.28505	0.0233113	1.55663	0.00175864
A_24_P218757	1.14605	0.0667206	1.25783	0.0466621	1.50006	0.00456871
A_23_P391396	1.14745	0.0570053	1.72989	0.000872203	2.20802	8.06e-05
A_23_P6786	1.14847	0.0437199	1.25798	0.0335311	1.71906	0.000649477
A_23_P54000	1.14945	0.0703497	1.22117	0.0623784	2.0061	0.00038378
A_23_P82394	1.15013	0.0506411	1.58362	0.000695942	1.89147	8.02697e-05
A_24_P925062	1.15014	0.0742172	1.44332	0.00937886	1.92344	0.000430521
A_24_P67988	1.15124	0.0359299	1.66384	0.00081775	1.88284	0.000143289
A_23_P87839	1.15199	0.0617548	1.60494	0.00351578	2.34168	0.000223898
A_24_P304311	1.15316	0.096668	1.34782	0.0297776	1.62423	0.00409207
A_23_P2322	1.1532	0.0356894	1.6883	0.000872203	1.66635	0.000288763
A_24_P221475	1.15473	0.0254867	1.37751	0.00496981	2.23451	6.90646e-05
A_23_P101193	1.15516	0.0969115	1.76835	0.00236079	2.3853	0.000276568
A_24_P304439	1.15636	0.0416702	1.24488	0.00830497	1.72141	0.000162367
A_23_P144929	1.15662	0.0586259	1.23942	0.0473967	2.0214	0.000216726
A_32_P182388	1.15749	0.0156199	1.61776	0.000831643	1.4685	0.000776591
A_23_P81811	1.15952	0.0226185	1.33366	0.00746526	1.55103	0.000811567
A_23_P340218	1.15983	0.0509145	1.34051	0.0137689	1.74307	0.000688143
A_23_P211835	1.16062	0.0314839	1.376	0.0059972	1.50498	0.00175864
A_23_P429581	1.16136	0.0773472	1.37832	0.0196003	1.54197	0.00589203
A_23_P146576	1.16148	0.0671789	1.46518	0.0097933	2.24851	0.000311062
A_32_P139113	1.16204	0.0722436	1.45257	0.0113722	1.58397	0.00336838
A_23_P60306	1.16317	0.0475447	2.12134	0.00303372	1.4184	0.00482696
A_23_P203773	1.16381	0.0400907	1.44928	0.00499588	2.04895	0.00017946
A_24_P136551	1.16425	0.0567283	1.61974	0.00333204	2.06464	0.000446966
A_32_P83784	1.16547	0.0137211	1.51935	0.000919558	1.16011	0.0347373
A_23_P210886	1.16591	0.0712942	1.84558	0.00184698	1.58602	0.00345598
A_23_P36484	1.16618	0.0733294	1.2143	0.0683268	2.12091	0.000289607
A_24_P784203	1.16651	0.0307312	1.50048	0.00256894	1.55883	0.00123866
A_23_P165927	1.16685	0.0459179	1.25898	0.0414779	1.50649	0.00347253
A_24_P68358	1.1673	0.018641	1.62626	0.000872203	1.31249	0.00415078
A_23_P163567	1.16765	0.0183366	1.64487	0.00124965	1.51418	0.000853371
A_23_P355439	1.16849	0.029394	1.19723	0.0520241	1.8757	0.000234111
A_23_P212617	1.17049	0.0863267	1.52744	0.00994732	1.34543	0.0294016
A_23_P114929	1.17064	0.0688255	1.33543	0.0222418	1.70921	0.00135533
A_32_P210691	1.17553	0.022844	1.50699	0.000890456	1.95442	8.00578e-05
A_24_P923028	1.17572	0.0591437	1.29072	0.0541391	1.66563	0.00313946
A_32_P33765	1.17588	0.0474238	1.53549	0.00457792	1.95609	0.000373054
A_32_P192842	1.17612	0.0438041	1.42095	0.0111015	1.62881	0.00177001
A_23_P214798	1.17704	0.0347459	1.82053	0.00126829	1.80708	0.000754205
A_23_P250963	1.17746	0.0308467	1.75083	0.00139886	1.88419	0.000430521
A_32_P183987	1.17789	0.0269451	1.44084	0.00494841	1.75969	0.000485251
A_24_P641130	1.17855	0.0128662	2.38189	0.00030273	1.30383	0.00337963
A_23_P376704	1.1791	0.0217998	1.54329	0.00242262	1.55355	0.00133706
A_23_P365267	1.18003	0.0234407	1.33199	0.00659829	2.04987	0.00012379
A_24_P829541	1.18145	0.00759071	1.37207	0.00349947	1.86655	8.19325e-05
A_24_P944782	1.18151	0.0804804	1.30435	0.0435316	2.16702	0.000484537
A_32_P50431	1.18241	0.0546865	1.35609	0.0171644	2.00132	0.000509715
A_32_P160025	1.18249	0.00972122	1.31947	0.00616071	1.64053	0.000283705
A_24_P242036	1.18288	0.00715394	1.1282	0.0903169	2.16013	5.43603e-05
A_24_P110983	1.18296	0.0842573	1.45962	0.0226503	1.64734	0.00609265
A_24_P179244	1.18317	0.0846855	1.66067	0.0077915	1.80717	0.00326645
A_32_P44987	1.18345	0.0452541	1.60516	0.00400983	1.3933	0.00934832
A_24_P381136	1.18387	0.0399389	1.4628	0.00697015	1.64426	0.00160465
A_32_P129894	1.1881	0.00841993	1.70245	0.000812519	1.19901	0.0251645
A_24_P925389	1.18833	0.0712367	1.35446	0.0446052	1.85024	0.00201066
A_24_P881562	1.18905	0.0143648	1.25624	0.0140014	1.61027	0.000583953
A_23_P104689	1.18935	0.0295354	1.40706	0.0116511	1.63815	0.0390763
A_24_P257759	1.19015	0.0564717	1.85108	0.00188345	2.08569	0.000483401
A_23_P404016	1.19164	0.0534184	1.58095	0.00776635	1.26134	0.0789059
A_23_P38181	1.19169	0.0860389	1.33179	0.0543743	1.66081	0.00542516
A_23_P135257	1.19278	0.00818784	1.27616	0.0110881	1.77411	0.000190805
A_32_P132860	1.19341	0.0183366	1.19533	0.0735839	1.63508	0.000916924
A_23_P86587	1.19427	0.0115479	1.14709	0.0606509	2.03425	7.22331e-05
A_23_P252023	1.19467	0.0488992	1.54368	0.00793013	1.61751	0.00417884
A_23_P147984	1.19661	0.0269484	1.38097	0.013718	1.93373	0.0003851
A_24_P462428	1.19783	0.0289696	1.66759	0.00283233	1.38599	0.0112308
A_24_P587443	1.19808	0.0329802	1.39999	0.0097319	1.71956	0.00100443
A_23_P421513	1.19822	0.00628929	1.74013	0.000695942	1.44227	0.00091869
A_24_P586450	1.19904	0.0265384	1.66652	0.00150691	1.47047	0.00265539
A_23_P202540	1.19912	0.059189	1.16026	0.0639627	1.66351	0.00293703
A_23_P153197	1.20048	0.0809241	1.30481	0.0850542	1.50409	0.018449
A_23_P104199	1.20095	0.015428	1.25679	0.0488043	1.56345	0.00361684
A_23_P93169	1.20146	0.0147802	1.3635	0.00949175	1.5074	0.00177714
A_32_P140521	1.20288	0.093986	1.51272	0.0213372	1.57401	0.0156338
A_24_P330385	1.203	0.0117736	1.39137	0.00496981	1.54306	0.00105344
A_23_P217151	1.20314	0.0299418	1.20331	0.0770188	1.79778	0.000647557
A_23_P166	1.20353	0.0846197	1.32821	0.0583736	1.52593	0.0125469
A_24_P160868	1.2037	0.0961301	1.54288	0.0194369	1.55919	0.0156522
A_24_P943193	1.20415	0.0277874	1.61033	0.0032307	1.34191	0.0127119
A_23_P72737	1.2043	0.0938498	1.56534	0.0120099	2.0913	0.00110418
A_23_P258190	1.20534	0.0958219	1.87914	0.0053564	1.73749	0.00735584
A_32_P121226	1.20549	0.022898	1.50314	0.0062476	1.93184	0.000593843
A_24_P72178	1.20549	0.0515374	1.396	0.0270673	1.76208	0.00249389
A_24_P81841	1.20554	0.041647	1.72324	0.015545	2.27296	0.000227748
A_23_P323783	1.2071	0.0763823	1.65196	0.00813852	1.54361	0.0125413
A_24_P860662	1.20744	0.0352114	1.72439	0.00285754	1.51638	0.00609779
A_24_P32215	1.20984	0.0114847	1.74563	0.000873008	1.66138	0.00058962
A_23_P168610	1.21014	0.0733294	1.3822	0.0384211	2.6299	0.000288763
A_23_P300033	1.21137	0.0820602	1.34122	0.070306	1.87639	0.00306006
A_24_P940863	1.21151	0.0918303	1.3895	0.0534914	1.57941	0.0134882
A_23_P251118	1.21202	0.0719919	1.50493	0.0158544	1.58697	0.0066921
A_23_P502174	1.21276	0.00716365	1.14506	0.0683429	1.57727	0.000277224
A_23_P29939	1.21339	0.0098935	1.24935	0.048282	1.50417	0.000614107
A_24_P345993	1.21368	0.0115736	1.50418	0.00236079	1.38245	0.00275514
A_23_P106887	1.21473	0.0630797	1.50853	0.016564	1.38175	0.0428004
A_24_P332862	1.21566	0.0264459	1.3246	0.0192922	1.58526	0.00198335
A_23_P211543	1.21617	0.0529013	1.68319	0.00696412	1.42742	0.028069
A_23_P4353	1.2191	0.0442984	1.43205	0.0215159	1.68471	0.00443057
A_23_P409489	1.21958	0.0499642	1.41553	0.0186686	2.17535	0.000480309
A_24_P42140	1.22011	0.0254094	1.24492	0.0616296	1.5755	0.00301301
A_23_P41948	1.22013	0.00646503	1.52692	0.00207115	1.9268	0.000190173
A_23_P391946	1.22069	0.0678674	1.42859	0.0302138	1.7373	0.00467274
A_23_P122127	1.22118	0.0695521	1.44879	0.0242842	1.77862	0.00288632
A_32_P234691	1.22171	0.0563507	1.43063	0.0270881	1.86453	0.00272219
A_23_P92909	1.22175	0.0277498	1.2149	0.0923597	1.50671	0.00667624
A_24_P209204	1.22403	0.0809098	1.68229	0.0126646	1.41742	0.0495741
A_32_P153889	1.22543	0.0553627	1.44216	0.0249016	1.68552	0.0050452
A_23_P137097	1.22552	0.0135197	1.19291	0.0657418	1.55984	0.00149551
A_23_P77430	1.22556	0.0141892	1.42406	0.00589166	1.81394	0.000298507
A_24_P408206	1.22611	0.00584687	1.1636	0.0527448	1.72237	0.000145947
A_23_P37375	1.22616	0.0058585	1.2497	0.0109516	1.78223	0.000143576
A_24_P233850	1.22954	0.0513651	1.45363	0.0140014	1.77503	0.00220671
A_23_P205355	1.22988	0.0110034	1.46548	0.00436993	2.0386	0.000155468
A_24_P147765	1.23059	0.0274226	1.54547	0.00604024	1.77182	0.00131062
A_23_P92499	1.23093	0.0779405	1.39349	0.040364	1.77195	0.00479558
A_23_P151690	1.23121	0.0235899	1.48037	0.0106063	1.81505	0.00122533
A_24_P179516	1.23139	0.0246497	1.6848	0.00406145	1.53001	0.00512128
A_24_P461547	1.23142	0.00671471	1.22125	0.0284888	1.55275	0.00090931
A_23_P130787	1.23177	0.0329535	1.34744	0.0241156	1.51944	0.00504296
A_24_P25285	1.23258	0.00621143	1.28501	0.0074551	1.6237	0.000214494
A_24_P339272	1.23404	0.0162154	1.24807	0.0403964	1.71281	0.0010708
A_23_P406521	1.23427	0.0453365	1.43421	0.0250456	1.68835	0.00420806
A_23_P45345	1.23475	0.0266541	1.25971	0.0833474	1.71992	0.00265993
A_24_P678418	1.23491	0.0105516	1.55443	0.000831643	1.2995	0.00360271
A_24_P183994	1.23576	0.020975	1.30766	0.0268205	1.64665	0.001395
A_23_P214059	1.2378	0.00659727	1.44807	0.0985519	1.68236	0.000617667
A_23_P89665	1.23832	0.0150675	1.66577	0.00246362	1.61609	0.0015258
A_23_P111361	1.23851	0.0619372	1.68978	0.00776635	1.65386	0.00862452
A_23_P150818	1.23865	0.00904413	1.42461	0.00148504	2.08401	6.6024e-05
A_24_P935575	1.23884	0.00867927	1.21127	0.0220696	2.13049	8.02697e-05
A_24_P928798	1.23928	0.0357592	2.41943	0.000872203	1.84198	0.00180998
A_32_P172198	1.2399	0.0597361	1.50451	0.0246694	1.40074	0.0455566
A_32_P4318	1.24096	0.0123039	1.53188	0.00354918	1.52372	0.0017778
A_24_P307827	1.24097	0.0290903	1.41934	0.0211525	1.57343	0.00624548
A_23_P69606	1.2419	0.0393459	1.82276	0.00316763	2.34188	0.000538543
A_23_P133293	1.24217	0.0083381	1.61152	0.00154433	1.26717	0.0133045
A_23_P100315	1.24263	0.020394	1.2614	0.0387691	1.65025	0.00141854
A_23_P29723	1.24315	0.0538664	1.61299	0.0171644	1.99114	0.00272432
A_23_P33723	1.24384	0.0553151	1.36599	0.0476764	1.86975	0.00315352
A_24_P933647	1.24419	0.0199106	1.25992	0.0555739	1.68979	0.00185248
A_23_P88753	1.24438	0.0341908	1.24808	0.0866028	1.69899	0.00280865
A_32_P25357	1.24497	0.00939671	1.32352	0.0143868	1.91302	0.000344185
A_23_P313428	1.24503	0.0263416	1.27852	0.0852834	1.90447	0.0014807
A_23_P11372	1.24524	0.0118327	1.48409	0.00357753	1.63332	0.000711371
A_32_P82530	1.24558	0.0793818	1.64633	0.0192802	1.74133	0.00897386
A_23_P355510	1.24616	0.0214529	1.30465	0.0368761	1.82612	0.00130533
A_23_P501193	1.24772	0.0239792	1.6575	0.00490157	1.61784	0.00487727
A_32_P71352	1.24847	0.00868043	1.65071	0.00140368	1.6571	0.00068431
A_23_P21134	1.25033	0.024466	1.39337	0.023169	1.59017	0.00477102
A_32_P133926	1.25132	0.012163	1.22109	0.0657686	1.80247	0.000555461
A_23_P216655	1.25358	0.0439216	1.50278	0.0170109	1.77636	0.00351882
A_23_P76731	1.25387	0.0313561	1.55287	0.0125871	1.83748	0.00233557
A_23_P136238	1.25403	0.0184379	1.4995	0.0105003	1.83809	0.00118904
A_24_P50759	1.25643	0.00366429	1.50576	0.00197762	1.74455	0.000302407
A_24_P17909	1.25664	0.0383785	1.65125	0.00830497	1.71367	0.00473454
A_23_P34741	1.25825	0.0905368	1.40256	0.0859396	1.53279	0.0437797
A_23_P396981	1.25907	0.00405083	1.29037	0.00804238	1.85832	8.88424e-05
A_23_P306148	1.26042	0.0231425	1.32152	0.0447119	1.54939	0.00759577
A_23_P90925	1.26219	0.0250427	1.63287	0.00555726	1.83284	0.00146779
A_32_P34703	1.26271	0.0125741	1.40785	0.0136524	1.8419	0.000730144
A_23_P385206	1.26332	0.0577326	1.48079	0.0351316	1.50554	0.0288508
A_23_P410587	1.26338	0.0460622	1.51696	0.0240344	1.5856	0.0169333
A_23_P56865	1.26352	0.0043331	1.31884	0.0068933	1.50657	0.000886357
A_23_P253046	1.26391	0.00823211	1.26626	0.0236085	1.56858	0.000869231
A_24_P752279	1.26451	0.0744666	1.40803	0.0669287	1.72693	0.0115581
A_23_P421638	1.26554	0.00623597	1.32515	0.0128071	1.76339	0.000347768
A_24_P921343	1.26739	0.0231643	1.37805	0.0303777	1.98011	0.000964706
A_32_P94521	1.26743	0.00950939	1.23626	0.0546839	1.50916	0.00367102
A_23_P380954	1.26897	0.0113424	1.57632	0.00343627	1.68304	0.00100574
A_24_P180680	1.26918	0.0217998	1.70917	0.00472335	2.72414	0.000204296
A_24_P255233	1.27092	0.0106327	1.63155	0.00230022	1.30844	0.0176279
A_23_P309261	1.27102	0.0347033	1.46833	0.0203292	1.80898	0.00286731
A_23_P13425	1.27112	0.0168112	1.34651	0.0302778	1.8397	0.00111993
A_23_P62840	1.27148	0.00652606	1.5025	0.00353476	1.50383	0.00255717
A_23_P119095	1.27241	0.0314491	1.43486	0.0274924	2.68159	0.000336341
A_32_P53852	1.27501	0.0454488	1.31849	0.09132	1.64606	0.0107878
A_24_P928901	1.27559	0.00390198	1.20253	0.0315759	1.50769	0.00066746
A_23_P155596	1.27572	0.0924679	1.76935	0.0187019	1.80596	0.0146228
A_32_P50326	1.27612	0.0211893	1.38373	0.0290766	1.94805	0.00107405
A_24_P350136	1.27673	0.00651252	1.23435	0.0401841	1.86957	0.000308448
A_32_P93517	1.27697	0.00171111	1.61565	0.000872203	1.15049	0.0530118
A_24_P212811	1.27783	0.0295488	1.44879	0.0250194	1.66162	0.00618722
A_23_P349676	1.27822	0.0140849	1.28911	0.0378393	1.51287	0.0036837
A_24_P152491	1.27902	0.0134867	1.50208	0.0093526	1.58084	0.00338114
A_23_P144438	1.27914	0.0534206	1.55077	0.021095	1.81353	0.00624572
A_32_P197340	1.27939	0.00238382	1.16304	0.0565851	1.5899	0.000354408
A_24_P301629	1.27982	0.00972122	1.33031	0.0157326	2.08136	0.000212463
A_23_P32785	1.2806	0.0156353	1.657	0.00470832	1.4926	0.00860787
A_32_P33213	1.28074	0.0809007	1.41761	0.0860309	1.99007	0.00691132
A_23_P123164	1.28151	0.0252964	1.58716	0.00804238	2.13499	0.000533862
A_23_P151915	1.28167	0.0158416	1.56717	0.00650047	2.15871	0.000521416
A_24_P931974	1.28228	0.017266	1.68733	0.00469144	2.23391	0.000599135
A_23_P68198	1.28256	0.0035301	1.25727	0.00961209	1.67655	0.000277174
A_23_P48637	1.28266	0.00470138	1.63411	0.0018331	1.20887	0.0458189
A_23_P359214	1.28301	0.0332702	1.84252	0.00579069	1.66833	0.00829554
A_23_P10591	1.28383	0.00883897	1.46454	0.00703282	2.91306	7.79589e-05
A_23_P27167	1.28387	0.0853498	1.55027	0.0450537	1.8334	0.0146511
A_24_P723655	1.28444	0.00927338	1.22345	0.0690545	1.78901	0.000915243
A_23_P83498	1.28473	0.0959368	1.48091	0.023169	1.50022	0.0188745
A_24_P135276	1.28481	0.052087	1.59276	0.0284888	1.36747	0.0946072
A_24_P315754	1.28522	0.0167698	1.38975	0.016564	1.76147	0.00129679
A_24_P67784	1.28625	0.076184	1.7276	0.0194445	2.10802	0.00487727
A_32_P29451	1.2873	0.00378206	1.48036	0.00230022	1.61309	0.000353507
A_23_P75260	1.28816	0.0143648	1.49887	0.00651318	1.63124	0.00202876
A_23_P36129	1.28956	0.0059425	1.53612	0.0032307	1.59407	0.0011672
A_24_P288612	1.29042	0.00952707	1.59733	0.00379527	1.87525	0.000754205
A_23_P26777	1.29066	0.0109761	1.25542	0.0545495	1.88135	0.000612955
A_32_P64936	1.29303	0.00884055	1.19715	0.0843995	1.60896	0.0014345
A_32_P82265	1.29368	0.0243116	2.34251	0.00137906	1.65632	0.00605017
A_23_P131036	1.29395	0.00262568	1.37569	0.00425948	1.50039	0.000895139
A_23_P103897	1.29468	0.00539276	1.37218	0.00850756	1.51682	0.0019661
A_24_P944331	1.29652	0.0356894	1.32494	0.0890054	1.69487	0.00821447
A_32_P126928	1.2998	0.00571613	1.17169	0.069201	2.71161	6.12928e-05
A_24_P418044	1.30005	0.00439417	1.51959	0.00240165	2.70041	5.31055e-05
A_23_P334664	1.30056	0.0058585	1.517	0.00406145	2.5354	9.95537e-05
A_23_P356755	1.30184	0.079428	1.77193	0.0197831	1.66026	0.029455
A_23_P55477	1.30205	0.0694593	1.4084	0.0740289	2.22836	0.00300684
A_24_P7600	1.30273	0.0041673	1.20538	0.0130389	1.7826	0.000112981
A_24_P19810	1.30289	0.0262346	1.74284	0.00585409	1.66256	0.00627101
A_32_P124521	1.30314	0.0221607	1.2806	0.0968313	2.31469	0.000667105
A_24_P269624	1.30393	0.0160833	1.32237	0.0395028	1.74841	0.00207686
A_23_P109254	1.3051	0.00248483	1.70397	0.000695942	1.53905	0.00040195
A_24_P935093	1.3062	0.0043666	1.79634	0.000872203	1.59398	0.00090931
A_23_P86072	1.30679	0.031598	2.08562	0.00290488	1.7236	0.00815234
A_23_P126735	1.30703	0.00498229	1.63477	0.00223122	1.63241	0.0010312
A_23_P353005	1.30731	0.00288768	1.30135	0.0143868	2.32924	7.64922e-05
A_24_P229871	1.30888	0.0403046	1.36948	0.0868088	2.91407	0.000602404
A_24_P273043	1.3093	0.00189932	1.90633	0.000695942	2.42168	5.81536e-05
A_24_P4678	1.31167	0.00530986	1.21038	0.0700315	1.51086	0.00305308
A_24_P924791	1.31377	0.00426034	1.19623	0.0586574	2.25915	8.38749e-05
A_23_P142606	1.31419	0.00945996	1.31105	0.0296156	1.55046	0.00293703
A_32_P89310	1.31503	0.0249881	1.32124	0.0624033	1.71961	0.00513584
A_24_P342670	1.31531	0.0147247	1.54299	0.0097624	1.69991	0.00282872
A_24_P409390	1.3185	0.0015308	1.1831	0.0443407	1.63755	0.000371916
A_23_P44665	1.31887	0.031838	1.399	0.0569922	1.65238	0.0142782
A_32_P138032	1.32018	0.0222878	1.42232	0.0356356	1.81883	0.00360069
A_32_P159651	1.32127	0.0129793	1.26846	0.0885104	1.6607	0.0046891
A_23_P152984	1.32128	0.0433972	1.43604	0.0634966	1.70332	0.0149182
A_32_P73821	1.32184	0.033232	1.60423	0.019521	1.71504	0.00813819
A_24_P245298	1.32243	0.0300632	1.49457	0.0385562	1.5794	0.0218386
A_23_P129332	1.32389	0.00191425	1.70982	0.000831643	1.58978	0.000321831
A_24_P759747	1.32526	0.00297477	1.50803	0.00224817	1.43364	0.00172507
A_23_P216667	1.32591	0.0132058	1.27488	0.0374976	2.30837	0.000233729
A_23_P211572	1.32596	0.00849287	1.38678	0.0187594	1.7241	0.00173922
A_24_P528586	1.32781	0.039708	1.67486	0.019778	1.42781	0.0728358
A_24_P14634	1.3285	0.0100144	1.41048	0.0247204	1.60246	0.00496188
A_23_P170761	1.32899	0.00219311	1.3204	0.0118123	1.93083	0.00017946
A_32_P127200	1.32975	0.0150675	1.29523	0.0772382	1.9317	0.00155782
A_32_P23731	1.33139	0.00367237	1.64222	0.00152372	1.50468	0.00141285
A_32_P14737	1.33145	0.00512305	1.34906	0.0177214	1.5228	0.00417884
A_23_P310094	1.3339	0.0528639	1.56126	0.0469477	2.21726	0.0047849
A_24_P884376	1.33403	0.0336524	1.35682	0.0882381	2.06364	0.00325792
A_32_P12169	1.33411	0.00314385	1.22704	0.0212628	2.23092	8.02697e-05
A_24_P33652	1.33802	0.0523795	1.46076	0.0776508	1.58905	0.0421768
A_23_P20196	1.33845	0.00166092	1.67677	0.000831643	1.61158	0.000282304
A_24_P128068	1.33871	0.0154789	1.90222	0.00258055	1.65914	0.00420904
A_24_P60634	1.33925	0.0138716	1.43066	0.0270621	1.5005	0.0160649
A_23_P250353	1.33981	0.00325843	1.18607	0.0496872	2.35868	7.22331e-05
A_23_P134347	1.34013	0.00778723	1.30915	0.0297881	1.70538	0.00177714
A_23_P414855	1.34076	0.00907057	1.68129	0.00506821	1.84004	0.00175783
A_24_P61753	1.341	0.0559989	1.47003	0.0782735	1.9912	0.00902837
A_23_P139635	1.3416	0.0103014	1.4381	0.0146446	1.80731	0.0013071
A_32_P183918	1.34177	0.0102696	1.47545	0.0140014	2.78717	0.000193224
A_24_P930707	1.34248	0.00427982	1.51013	0.00496981	2.57581	0.000103035
A_32_P35031	1.34286	0.0442951	2.8638	0.00182965	2.72146	0.00132633
A_32_P80255	1.34367	0.00167582	1.49718	0.00246911	2.89574	3.45739e-05
A_23_P420551	1.34485	0.00219311	1.2006	0.0186746	1.50835	0.000594311
A_32_P1516	1.34534	0.0114847	1.68859	0.00457792	1.78777	0.00196205
A_23_P168916	1.34616	0.0126301	1.51742	0.0141613	2.79568	0.000251515
A_23_P27936	1.34872	0.00268818	1.16039	0.031629	2.02897	6.99921e-05
A_24_P87686	1.35048	0.0284968	1.56806	0.0244514	1.66621	0.014565
A_24_P456723	1.35057	0.00621143	1.44038	0.00907119	2.2914	0.00017995
A_23_P107206	1.35091	0.00197313	1.34553	0.00687194	1.77676	0.000344684
A_24_P87931	1.35173	0.00112283	1.41098	0.00345191	2.14721	7.64922e-05
A_23_P87323	1.35424	0.00122669	1.27529	0.0160199	1.68486	0.000308448
A_24_P48187	1.35541	0.00119385	1.7891	0.000695942	2.17625	5.31055e-05
A_23_P252362	1.35616	0.00312503	1.33887	0.012024	1.6227	0.00129934
A_23_P22224	1.3578	0.0065687	1.35002	0.0294598	1.52848	0.00446024
A_24_P179277	1.3581	0.0506199	1.43779	0.096307	2.71685	0.00189692
A_32_P76122	1.35864	0.000693385	1.74069	0.000831643	1.66114	0.000308448
A_24_P333532	1.35936	0.00133918	1.52629	0.00182965	2.83353	3.45739e-05
A_24_P938475	1.35966	0.0675556	1.8096	0.0279997	1.67616	0.0463808
A_23_P34733	1.36034	0.0438231	1.75282	0.021991	2.57285	0.00229304
A_23_P398254	1.36316	0.0458825	1.56602	0.044125	1.95786	0.00933289
A_23_P49136	1.36403	0.0333032	1.68373	0.0208651	1.88148	0.00973659
A_23_P104351	1.36476	0.050882	1.60928	0.046014	1.8929	0.016259
A_24_P83808	1.36646	0.0126508	1.3689	0.0539888	1.90233	0.00300684
A_24_P936809	1.3668	0.00318596	1.31202	0.0134272	1.94864	0.000256888
A_23_P342612	1.36855	0.0125885	1.38739	0.0269252	1.86636	0.00161175
A_24_P938015	1.36921	0.039645	1.43237	0.093066	2.263	0.00429705
A_32_P32876	1.37286	0.0103423	1.5049	0.0109516	2.12457	0.000730144
A_23_P7087	1.37328	0.000693385	1.50889	0.00120661	1.58867	0.000272336
A_23_P209389	1.37529	0.00133893	1.43268	0.00336565	1.63434	0.00036761
A_32_P71171	1.37553	0.0229219	1.59146	0.0256373	1.42386	0.06807
A_32_P162862	1.37578	0.00136127	1.54494	0.00154496	1.84012	0.000204893
A_23_P46045	1.37673	0.00340105	1.45657	0.00746526	1.54427	0.00294162
A_23_P59167	1.38253	0.00927736	1.56718	0.0126646	1.58384	0.00773333
A_32_P215318	1.38497	0.00405083	1.3204	0.0155722	1.76347	0.000704638
A_23_P315571	1.38598	0.00143339	1.14125	0.0783115	2.27206	7.22331e-05
A_23_P31866	1.39162	0.0166678	1.50341	0.0228168	1.30995	0.0767673
A_32_P87769	1.39209	0.00355426	1.282	0.0235068	1.84835	0.000509715
A_23_P130241	1.39316	0.0308467	1.83384	0.0189097	1.80779	0.014639
A_24_P53976	1.39458	0.0347459	1.45166	0.0824187	2.64743	0.00193208
A_24_P940375	1.39459	0.0012915	1.63488	0.00139757	2.31945	7.19847e-05
A_23_P166353	1.39504	0.00685623	1.60533	0.00614584	1.45489	0.0145133
A_32_P105281	1.3967	0.019277	1.37096	0.0834865	1.96261	0.00538207
A_23_P165372	1.39692	0.00621351	1.55318	0.00783648	1.65286	0.00360533
A_32_P190294	1.3977	0.00127992	1.87626	0.000695942	1.33565	0.00700294
A_32_P121674	1.40046	0.0321995	1.88878	0.0140014	1.74561	0.0211312
A_32_P166031	1.4055	0.00633053	1.79304	0.00354918	1.74129	0.00327061
A_32_P210106	1.40728	0.0126456	1.57101	0.0186738	1.47063	0.034001
A_24_P261691	1.40742	0.0537223	1.56743	0.0446052	1.72237	0.0246724
A_24_P202857	1.41019	0.0575524	1.52179	0.0758528	1.76907	0.0304083
A_23_P15647	1.41047	0.0183366	2.09491	0.00457792	1.6785	0.0135588
A_24_P920521	1.41191	0.0760175	2.16832	0.0187019	2.26071	0.0152232
A_23_P59210	1.41358	0.0157487	1.55393	0.00459359	1.852	0.000730144
A_32_P229132	1.41619	0.00127276	1.37243	0.00535227	1.58534	0.000469137
A_23_P137073	1.41777	0.00584355	1.55559	0.00961209	1.62773	0.00520531
A_32_P225092	1.41779	0.0270755	2.1067	0.0071206	2.24089	0.00382975
A_24_P50368	1.41888	0.00314707	1.49755	0.00784821	1.61206	0.00259787
A_32_P84049	1.42123	0.000883222	1.45149	0.00354918	2.29056	7.64922e-05
A_24_P926507	1.42191	0.00488937	1.41341	0.0216892	1.72282	0.00263735
A_23_P9186	1.42621	0.00515722	1.46424	0.0167317	1.68254	0.00456704
A_32_P4700	1.42623	0.000821429	1.70024	0.000812519	1.603	0.000302407
A_23_P502241	1.43214	0.00131783	1.3547	0.0129007	2.01457	0.000307978
A_23_P166779	1.43267	0.0521503	1.67707	0.0556507	1.76655	0.042159
A_32_P528311	1.43317	0.00421919	1.19016	0.0953455	1.83949	0.000735286
A_24_P298723	1.43322	0.0582073	1.52528	0.0794068	1.92736	0.0191179
A_24_P392480	1.43465	0.00915586	1.60327	0.0114073	1.83478	0.00356142
A_23_P11543	1.43862	0.0121334	1.72243	0.0106063	1.79666	0.00476876
A_24_P358606	1.4389	0.0237801	1.49866	0.0637578	1.51098	0.0508645
A_23_P27180	1.43983	0.0519711	1.55052	0.0676761	1.63722	0.0527024
A_23_P91423	1.44022	0.000698705	1.6489	0.000872203	1.27395	0.0074313
A_23_P99452	1.44203	0.00160593	1.38195	0.00805212	1.79184	0.000397111
A_24_P838483	1.44897	0.00406609	1.75309	0.00251618	1.79728	0.00121889
A_23_P256735	1.44908	0.0050804	1.60582	0.0074594	1.37071	0.0298844
A_23_P102694	1.45045	0.000766692	1.48882	0.00263556	1.85961	0.000288763
A_23_P119562	1.45937	0.000601048	1.37514	0.00420825	1.65294	0.000266863
A_23_P15067	1.46284	0.0115647	1.54711	0.026365	1.54418	0.0276699
A_23_P111132	1.46311	0.0348967	1.51631	0.0546839	1.80978	0.0163463
A_23_P209088	1.4744	0.0172166	1.64795	0.0141047	1.59177	0.0192052
A_24_P11640	1.47453	0.000698705	1.29271	0.0103107	2.07021	0.00012379
A_23_P140342	1.47567	0.0123711	2.20704	0.00386227	2.34471	0.0018923
A_32_P53822	1.47638	0.0584246	1.56261	0.0935791	1.85006	0.0379889
A_24_P702871	1.47813	0.00172569	1.38672	0.0109635	1.58317	0.00187571
A_23_P404134	1.4787	0.0195577	2.175	0.00615963	2.41749	0.00270567
A_23_P64247	1.48612	0.0204629	2.08844	0.00856942	2.43511	0.00312515
A_24_P365526	1.49139	0.00229161	1.25609	0.0435316	2.91874	8.27373e-05
A_24_P332953	1.49357	0.0080067	1.35774	0.0700908	1.74268	0.00658818
A_24_P219266	1.50016	0.00775121	1.29478	0.0818661	1.7856	0.00348462
A_23_P61524	1.50185	0.0200225	1.60305	0.0499874	1.91355	0.0149099
A_24_P920904	1.51603	0.000688712	1.22315	0.0520213	1.79085	0.000415433
A_24_P74932	1.51796	0.00057764	1.53202	0.00308631	1.67163	0.000541141
A_24_P282363	1.51855	0.00531606	1.45192	0.0335804	1.54831	0.0199064
A_23_P371107	1.51877	0.0102131	2.07676	0.00490157	2.27254	0.00195746
A_24_P349636	1.52977	0.00117489	1.94125	0.000872203	2.94343	6.6024e-05
A_32_P122468	1.52994	0.00644869	1.67128	0.00935351	1.69035	0.00809413
A_32_P23145	1.53594	0.000451469	1.6553	0.000831643	1.57191	0.000285053
A_23_P80040	1.54141	0.000301033	1.28533	0.00965282	1.46872	0.000710502
A_23_P70328	1.54171	0.00550696	1.74066	0.0113256	2.18996	0.00220595
A_23_P85585	1.54339	0.0125885	2.12423	0.00659829	2.31524	0.00315613
A_23_P145657	1.54544	0.00990884	1.57235	0.0302138	1.54855	0.0369605
A_24_P65910	1.54599	0.00424527	2.12374	0.00220727	2.33182	0.000670995
A_32_P444104	1.54979	0.00181838	1.40689	0.0066731	1.45916	0.00378128
A_24_P923142	1.55328	0.000530834	2.06012	0.000695942	1.81114	0.000361439
A_23_P135990	1.55758	0.0080067	1.37841	0.0937117	2.02291	0.00544563
A_23_P337292	1.56859	0.000698705	1.54871	0.00380489	1.42496	0.00482028
A_24_P276583	1.58479	0.0016089	2.12735	0.00111697	2.26306	0.000289607
A_24_P203882	1.59283	0.00230391	1.39636	0.0328708	2.07382	0.0013071
A_32_P70483	1.60381	0.000457254	1.28902	0.00757638	2.36114	5.79583e-05
A_32_P177595	1.61217	0.00151009	1.24613	0.0595717	1.63907	0.0026412
A_32_P143793	1.61284	0.0115479	1.50684	0.0545105	1.44324	0.0800674
A_24_P43391	1.62456	0.00209585	1.38508	0.0222418	1.25468	0.081743
A_23_P253464	1.64417	0.00201599	1.58003	0.0135995	2.04412	0.00175864
A_23_P34644	1.66669	0.00102159	1.26705	0.032582	1.54678	0.00280476
A_23_P258891	1.67759	0.0118515	1.47451	0.0752521	2.27843	0.00471936
A_32_P50734	1.72839	0.0109615	1.61987	0.0710305	3.47237	0.00162931
A_23_P323924	1.7357	0.000256997	1.17049	0.0270278	1.20562	0.0146333
A_24_P393582	1.76681	0.000315331	1.22581	0.0575273	1.81511	0.000509715
A_23_P144944	1.77961	0.000698705	1.33268	0.0378325	1.30877	0.0458069
A_32_P124580	1.78389	0.0060374	1.89537	0.0167972	2.61673	0.00300684
A_24_P144487	1.79398	0.000342676	1.24211	0.0214263	1.44956	0.00208998
A_24_P917044	1.83475	0.00198616	1.73849	0.00310946	2.93994	0.000145947
A_23_P426511	1.93411	0.000597614	1.83181	0.00201533	1.85607	0.00119799
A_32_P201579	1.94364	0.000451469	1.39883	0.00958059	1.26723	0.0369433
A_24_P776036	2.01796	0.000614704	1.27878	0.0674203	1.4876	0.0109369
A_32_P187817	2.02076	0.000256997	1.51268	0.00359763	1.37596	0.00914712
A_23_P19313	2.11265	0.000564157	2.04746	0.00134321	2.94896	0.000145862
A_23_P257063	2.17092	0.0121067	1.83394	0.0793546	4.7167	0.00216803
A_32_P235796	2.19824	0.000457254	1.99575	0.00100094	2.90416	0.000103035
A_32_P627	2.20013	0.000462334	2.00197	0.00120661	2.72663	0.00014894
A_23_P153320	2.20472	0.000199633	2.16489	0.000404172	3.52436	2.9878e-05
A_24_P510081	2.2411	0.000350119	2.01779	0.000872203	2.76933	0.000103481
A_23_P106024	2.24777	0.000510328	2.04411	0.0013602	2.97612	0.000143576
A_23_P157196	2.25753	0.000527142	1.35613	0.051855	1.50901	0.0189744
A_23_P86975	2.26249	0.00020081	2.09151	0.000440367	3.18215	3.42693e-05
A_32_P230192	2.26508	0.000462334	1.98085	0.00141405	2.85289	0.000152179
A_24_P333630	2.27579	0.000218907	2.07618	0.000695942	2.77322	7.22331e-05
A_23_P140907	2.31146	0.000301033	2.06219	0.000831643	2.90054	8.25777e-05
A_24_P407439	2.44675	0.00020081	2.07355	0.000695942	3.03136	6.26685e-05
A_24_P325107	2.4543	0.000141488	1.2453	0.0648305	2.24422	0.000289797
A_32_P84933	2.52032	3.92e-05	1.17897	0.0856527	1.71151	0.000444269
A_24_P352445	2.6126	0.000256997	1.30616	0.0547941	1.62226	0.00522798
A_23_P254594	2.75447	0.000218907	1.27467	0.0814334	2.45591	0.000399368

## Sheet: FC>±2
IDcommon	FC24	FDR24	FC48	FDR48	FC72	FDR72
A_23_P204810	-2.60544	0.000568644	-2.62044	0.00256894	-2.62691	0.00120326		**All values with at least one fold change above 2
A_32_P43349	-2.56874	3.92e-05	-1.36589	0.0104616	-1.95453	0.000248833
A_24_P167825	-2.56475	3.92e-05	-1.27355	0.0160986	-3.93021	2.9878e-05
A_23_P216915	-2.39586	0.000342676	-1.31729	0.0873894	-3.04248	0.000307884
A_23_P375147	-2.37243	7.6e-05	-1.31151	0.0202894	-4.09889	2.9878e-05
A_23_P2973	-2.27011	0.000194406	-1.23162	0.0807014	-3.43332	7.07673e-05
A_23_P105562	-2.22796	0.000457254	-1.91399	0.00308925	-3.06371	0.000212463
A_32_P103162	-2.20591	0.000111551	-1.89407	0.000890456	-3.13265	5.31055e-05
A_23_P43317	-2.20397	3.92e-05	-1.1656	0.0539705	-2.3971	4.50362e-05
A_23_P369447	-2.13217	5.58e-05	-1.83389	0.000695942	-4.42325	1.78567e-05
A_23_P171409	-2.11006	0.000342676	-1.50892	0.012684	-3.29284	0.000135866
A_23_P2683	-2.07372	0.00286336	-1.64327	0.0544867	-1.62434	0.0606652
A_23_P92410	-2.05823	0.0104779	-1.22784	0.0119587	-1.4905	0.000647557
A_23_P319466	-2.0559	0.000462334	-1.92374	0.00282037	-2.91069	0.000226043
A_32_P192586	-2.00954	0.000141488	-1.90409	0.000827201	-3.03868	4.50362e-05
A_23_P45496	-2.00407	0.0047237	-1.56521	0.0755864	-1.739	0.0406212
A_32_P131940	-1.98258	0.00571613	-2.31707	0.00835975	-2.70226	0.00315575
A_23_P97749	-1.97985	0.00124244	-2.15833	0.00447277	-3.3979	0.000378765
A_32_P111394	-1.94535	0.0242243	-1.98114	0.0621459	-3.64421	0.00598352
A_24_P295452	-1.924	0.000447748	-1.7562	0.00339131	-2.86522	0.000135866
A_24_P936067	-1.92399	0.0357829	-1.9346	0.098797	-2.10175	0.0730266
A_23_P65254	-1.91744	0.000451469	-1.30546	0.0344063	-2.27731	0.000266863
A_32_P136982	-1.91632	0.000241192	-1.9324	0.000904418	-3.15088	5.79583e-05
A_23_P30122	-1.90205	9.34e-05	-2.23216	0.00383778	-2.16568	5.31055e-05
A_23_P31765	-1.9005	0.0024332	-1.81277	0.0137171	-3.13515	0.000636608
A_23_P213766	-1.89788	0.0112667	-1.89452	0.0442381	-3.89896	0.00203217
A_32_P136662	-1.89363	0.000757461	-1.48302	0.0184444	-3.20213	0.00017946
A_32_P210572	-1.89103	0.000451469	-1.6712	0.00282037	-3.78447	4.5913e-05
A_24_P83799	-1.87021	0.000636933	-1.96336	0.00220727	-2.97764	0.000158928
A_23_P317082	-1.85806	0.000862305	-1.81699	0.00521383	-5.09551	6.71217e-05
A_24_P916195	-1.83988	0.000241192	-1.27652	0.0240364	-3.18808	3.75704e-05
A_24_P363609	-1.83969	0.000451469	-1.8803	0.00141405	-3.03346	8.06e-05
A_23_P141180	-1.82369	0.00262568	-1.96516	0.00618998	-3.21	0.000478471
A_24_P239578	-1.8169	0.000457254	-1.56946	0.00642071	-2.15726	0.000443654
A_32_P105465	-1.81344	0.000446773	-1.24338	0.0447951	-2.87839	8.02697e-05
A_23_P63829	-1.80983	0.00020889	-1.34226	0.00459359	-2.19251	7.64922e-05
A_23_P205686	-1.80949	0.00204645	-1.37763	0.0322928	-2.71162	0.000224068
A_32_P102745	-1.80502	0.0109615	-1.83196	0.0392878	-3.47043	0.00209431
A_24_P849319	-1.80376	0.000218907	-2.45422	0.00030273	-2.80335	4.15437e-05
A_23_P144911	-1.79104	0.00126062	-1.86647	0.00411238	-3.08032	0.000251515
A_23_P145437	-1.78755	0.00787309	-1.597	0.0440087	-3.57223	0.000647557
A_23_P89123	-1.77268	0.0145228	-1.61929	0.0799233	-2.95781	0.00356739
A_24_P457912	-1.76607	0.00127056	-1.84505	0.00447277	-2.2249	0.00103105
A_23_P201342	-1.76148	0.0444393	-2.53694	0.0312879	-5.09951	0.00326733
A_24_P264031	-1.75418	0.0242171	-1.94702	0.0468223	-5.18046	0.00111457
A_32_P69536	-1.75269	0.00190024	-2.01157	0.00373108	-3.02365	0.000385385
A_23_P54373	-1.75056	0.0607587	-2.48222	0.0413213	-4.84479	0.00488389
A_23_P375524	-1.75011	0.00284927	-1.86771	0.0081085	-2.01422	0.00379605
A_23_P35099	-1.74705	0.0151592	-1.79275	0.037239	-4.79471	0.000633334
A_32_P200697	-1.74034	0.00127992	-1.723	0.00357613	-3.30272	8.38749e-05
A_23_P50508	-1.72533	0.018063	-1.61263	0.0927858	-2.94003	0.00445866
A_24_P99679	-1.71942	0.00405083	-2.14638	0.00521383	-2.09857	0.00388963
A_23_P51136	-1.71409	0.0696825	-2.51428	0.0423274	-4.72994	0.00577725
A_23_P354288	-1.70493	0.0166605	-1.59195	0.0942636	-2.45594	0.00992587
A_24_P58647	-1.69175	0.000558757	-1.40856	0.00383778	-4.8038	1.78567e-05
A_24_P408981	-1.68839	0.00453143	-2.18151	0.00345191	-2.97714	0.000472442
A_24_P265346	-1.68772	0.00020081	-1.4311	0.00236079	-2.61379	4.47758e-05
A_23_P201179	-1.68599	0.0139272	-2.3188	0.0105185	-3.84644	0.00113276
A_23_P162982	-1.68352	0.0331952	-2.02229	0.0314601	-3.66184	0.00265777
A_23_P218918	-1.68342	0.00904413	-1.3052	0.031629	-2.61287	0.00156759
A_23_P201940	-1.6831	0.00901477	-1.93554	0.0168721	-3.21099	0.00137709
A_24_P925611	-1.68135	0.0444393	-1.97588	0.0540391	-2.22178	0.0346624
A_24_P321752	-1.68063	0.0127802	-1.49835	0.0985662	-3.10585	0.00191096
A_23_P206484	-1.68055	0.00682279	-1.70398	0.0277806	-2.37899	0.00365195
A_23_P107911	-1.67257	0.0115647	-2.28739	0.00757638	-3.14948	0.00163886
A_24_P135862	-1.65893	0.0083305	-1.5709	0.0473662	-2.16168	0.0062612
A_23_P11713	-1.65356	0.0120875	-2.21037	0.0085963	-3.31837	0.00132739
A_23_P69329	-1.64566	0.0015308	-2.1987	0.00120661	-2.52883	0.000234721
A_23_P79221	-1.64187	0.000462334	-1.36555	0.00924531	-2.16445	0.00012379
A_23_P402000	-1.63975	0.00584687	-1.69551	0.0161451	-2.30767	0.00170606
A_32_P227845	-1.63964	0.0115692	-1.57162	0.0619364	-2.22296	0.00785852
A_23_P202448	-1.63827	0.00197332	-1.28794	0.0891667	-2.70302	0.00036468
A_23_P155931	-1.63263	0.0668369	-2.38752	0.0361417	-4.82024	0.0034126
A_23_P128609	-1.63046	0.000620587	-1.50726	0.00407468	-2.31285	0.000141688
A_24_P817223	-1.61541	0.0014609	-1.52477	0.00934779	-3.13287	0.000119708
A_23_P54736	-1.6114	0.00586305	-1.8932	0.00827308	-2.49871	0.00148874
A_23_P50807	-1.61121	0.0176366	-1.55307	0.0837724	-2.34863	0.0081939
A_23_P32036	-1.60661	0.0193844	-1.69808	0.0381919	-3.14894	0.00165413
A_24_P341489	-1.60586	0.0212198	-1.76814	0.044965	-3.14703	0.00266801
A_24_P250614	-1.60564	0.0485271	-2.05938	0.0439078	-3.4361	0.00544259
A_24_P174641	-1.60355	0.00688105	-1.49681	0.0527056	-2.28058	0.00266666
A_23_P61487	-1.60316	0.0025891	-1.82485	0.00412071	-2.85904	0.000251515
A_24_P211351	-1.60209	0.00668262	-1.54582	0.0354266	-2.0817	0.00368929
A_23_P393144	-1.59792	0.000271045	-2.02738	0.000440367	-2.63149	3.42693e-05
A_24_P153880	-1.59433	0.00953119	-1.53999	0.0455811	-2.19159	0.00336838
A_23_P92967	-1.59352	0.00435819	-1.5341	0.0220712	-2.33106	0.00110566
A_24_P911612	-1.59288	0.00338212	-1.53133	0.0169384	-2.45217	0.000611556
A_32_P509169	-1.58952	0.0107955	-1.75563	0.0242694	-2.16273	0.00639148
A_23_P87727	-1.5873	0.00238802	-2.17694	0.00134321	-3.21458	0.000105808
A_23_P153586	-1.58418	0.000996892	-1.29611	0.0126789	-2.14765	0.000131937
A_23_P51410	-1.58305	0.00561572	-1.49606	0.0140521	-2.01159	0.00127736
A_23_P47527	-1.57643	0.00197003	-2.37095	0.00081775	-3.73245	5.79583e-05
A_32_P73991	-1.57519	0.0393708	-1.73745	0.0612735	-5.26151	0.000754205
A_23_P18078	-1.57029	0.00105421	-1.32806	0.0210715	-2.24139	0.000256825
A_23_P349147	-1.57011	0.00314827	-1.4216	0.0235082	-2.12243	0.000650303
A_23_P7074	-1.56943	0.00256019	-1.54815	0.0118184	-2.48256	0.000488477
A_32_P235753	-1.56928	0.0075713	-2.08211	0.00436993	-2.00253	0.00366357
A_23_P107051	-1.56806	0.0125741	-1.57807	0.0381717	-2.89202	0.00105587
A_24_P818378	-1.56741	0.00171238	-1.47757	0.00844256	-2.37549	0.000230195
A_23_P124022	-1.56738	0.0188152	-2.20499	0.00836166	-2.80784	0.00218314
A_24_P308144	-1.56672	0.015112	-1.70498	0.0171746	-4.35406	0.000234721
A_23_P126689	-1.56606	0.0572907	-2.38839	0.0213372	-4.40008	0.00211449
A_23_P103631	-1.56515	0.0749493	-2.03628	0.0584614	-4.27494	0.00358627
A_32_P135558	-1.56321	0.0387524	-1.97054	0.031081	-3.37571	0.00295417
A_23_P212284	-1.56125	0.00344203	-1.625	0.00632756	-2.05203	0.000970025
A_23_P77562	-1.56041	0.0206878	-1.81455	0.0272964	-5.31819	0.00031614
A_24_P362432	-1.55158	0.0834091	-2.66934	0.0153077	-2.34693	0.0243676
A_24_P560332	-1.55146	0.0398661	-1.81972	0.0494823	-3.68557	0.00230475
A_24_P236235	-1.55049	0.0335864	-1.78858	0.0474934	-2.19296	0.0152303
A_23_P140716	-1.54721	0.000462606	-1.43732	0.00282037	-2.05564	7.64922e-05
A_24_P62883	-1.54579	0.0111632	-1.47955	0.0675959	-2.33671	0.00330894
A_23_P30736	-1.5422	0.00105421	-1.49524	0.00354918	-2.5036	8.19325e-05
A_23_P96568	-1.54211	0.000457254	-1.21233	0.0337436	-2.60489	5.43603e-05
A_23_P139265	-1.53829	0.00303256	-2.22491	0.000872203	-2.82981	0.000135866
A_23_P147782	-1.53143	0.0222175	-1.56777	0.0608245	-2.33357	0.00588363
A_24_P185018	-1.53043	0.00285862	-1.34059	0.0324744	-2.32903	0.000353507
A_24_P665504	-1.52867	0.000564157	-1.54529	0.00155624	-2.2205	7.64922e-05
A_23_P357966	-1.52659	0.0233679	-2.29088	0.00643037	-2.94143	0.00176251
A_24_P350186	-1.52656	0.0758939	-2.06483	0.0455811	-3.09055	0.00895335
A_23_P201628	-1.52565	0.0140849	-2.30581	0.00371751	-2.87241	0.00107018
A_23_P31477	-1.52448	0.0101648	-1.41544	0.0637444	-2.45534	0.00153862
A_23_P409462	-1.52212	0.00641916	-1.65875	0.0109516	-2.05781	0.0019469
A_23_P404536	-1.51573	0.00188027	-1.28271	0.0378641	-3.14185	6.6024e-05
A_23_P145480	-1.51536	0.0189399	-2.32703	0.00506821	-2.88786	0.00159738
A_24_P250666	-1.51234	0.00102159	-1.23787	0.0290472	-2.17453	0.000103035
A_23_P257905	-1.51219	0.0249462	-1.58038	0.0505065	-3.32787	0.00102673
A_23_P37275	-1.51202	0.0137682	-2.27018	0.00410979	-2.74778	0.00134382
A_24_P247699	-1.51057	0.0284183	-1.93193	0.0164835	-3.54932	0.000964706
A_24_P79054	-1.50971	0.0197178	-2.04676	0.00968012	-2.72471	0.00180998
A_23_P35330	-1.50915	0.010246	-2.28322	0.00290488	-2.91563	0.00067971
A_23_P40926	-1.50723	0.0015308	-1.2469	0.0435592	-2.18985	0.000243472
A_23_P118042	-1.50126	0.0247748	-2.31276	0.00650047	-2.92766	0.00191352
A_23_P90311	-1.49906	0.0105516	-2.02246	0.0056044	-2.61201	0.00123144
A_24_P926189	-1.49312	0.00672875	-1.66264	0.00818551	-3.38354	0.000126328
A_23_P37244	-1.48969	0.00517902	-2.26587	0.000944867	-2.42395	0.000307465
A_32_P53558	-1.48926	0.0746813	-1.74874	0.0752625	-2.20193	0.0236311
A_23_P24870	-1.48478	0.0014609	-1.45237	0.00659829	-2.97952	5.31055e-05
A_24_P325533	-1.4843	0.00748772	-1.38623	0.0366285	-2.39313	0.000515382
A_32_P175934	-1.48284	0.000426301	-1.21427	0.0244174	-2.76629	2.9878e-05
A_32_P185718	-1.48024	0.00489215	-1.49478	0.0201145	-2.86051	0.000317643
A_23_P135966	-1.47997	0.00608874	-1.62355	0.0113711	-2.20423	0.00126656
A_23_P23996	-1.47925	0.0458069	-1.60752	0.0834541	-2.61079	0.00667624
A_23_P129903	-1.4769	0.019812	-2.32263	0.00426461	-2.82324	0.00139936
A_32_P55427	-1.47689	0.028934	-1.5831	0.0599077	-2.326	0.00640077
A_24_P341006	-1.4754	0.00515871	-1.53294	0.0121683	-2.09401	0.00101682
A_23_P368691	-1.47154	0.0051096	-1.52348	0.0149512	-2.15496	0.000985253
A_24_P150149	-1.4689	0.00527616	-1.41997	0.028426	-2.32779	0.00062951
A_23_P33539	-1.46708	0.0150675	-1.70606	0.0105003	-2.77344	0.000601574
A_24_P67618	-1.46654	0.0190915	-1.55018	0.0410949	-2.34099	0.00263506
A_23_P365081	-1.46298	0.00210277	-1.94001	0.00139886	-2.12605	0.000311138
A_23_P152873	-1.46137	0.00995236	-1.70255	0.00650073	-3.41836	0.000135866
A_23_P162640	-1.45937	0.0149633	-1.35827	0.0694295	-3.03234	0.00041191
A_32_P221624	-1.45504	0.00621143	-1.90546	0.00253307	-2.51517	0.000321831
A_24_P641673	-1.45401	0.0812084	-1.80248	0.0588335	-2.48187	0.0124597
A_23_P502470	-1.45103	0.0010126	-1.25033	0.017944	-3.75268	1.78567e-05
A_23_P170427	-1.45081	0.0175513	-1.77545	0.0132528	-3.56765	0.000341939
A_23_P22625	-1.44582	0.0083381	-1.51216	0.0192802	-3.21966	0.00023865
A_23_P141342	-1.44122	0.0675701	-1.74231	0.0559869	-2.03501	0.0251274
A_23_P117302	-1.43607	0.0356791	-1.90142	0.0140014	-3.56623	0.000712089
A_32_P42197	-1.4336	0.0488992	-1.54358	0.0904639	-2.51386	0.00609779
A_23_P379736	-1.42997	0.00117253	-1.49516	0.00263556	-2.60305	4.5913e-05
A_24_P202558	-1.42896	0.00297273	-1.2353	0.0838805	-2.04525	0.000649477
A_24_P58477	-1.4281	0.0101452	-1.56111	0.0189176	-2.16609	0.00176004
A_23_P79703	-1.42185	0.00109774	-1.44167	0.00308631	-2.49217	4.52827e-05
A_24_P842002	-1.41689	0.0294521	-1.45115	0.076517	-2.33251	0.00356739
A_23_P156807	-1.41291	0.00253446	-1.28999	0.0357399	-2.00861	0.000474175
A_23_P251868	-1.41274	0.0863598	-2.10182	0.0205797	-3.52318	0.00226809
A_24_P926576	-1.41042	0.0376154	-1.60569	0.04309	-2.62701	0.00225189
A_23_P156852	-1.40446	0.00641104	-1.43056	0.0178944	-2.42323	0.000247325
A_24_P940396	-1.40385	0.0516181	-2.02295	0.0109516	-1.58797	0.0418465
A_32_P92101	-1.40221	0.0098457	-1.88145	0.0027475	-2.30337	0.000610824
A_23_P5089	-1.40216	0.0488992	-1.53311	0.073385	-2.52983	0.00305761
A_23_P56091	-1.39885	0.0767197	-1.72732	0.0556066	-2.46423	0.00908405
A_23_P70213	-1.39671	0.0147919	-2.01011	0.0026055	-1.83909	0.00254082
A_32_P98496	-1.39536	0.000918238	-1.75135	0.000831643	-2.53933	5.31055e-05
A_24_P16470	-1.39484	0.00288768	-1.23189	0.0681584	-2.18925	0.00032259
A_23_P41390	-1.39395	0.0160232	-1.61096	0.0150819	-3.28043	0.000278787
A_32_P170178	-1.38542	0.00284927	-1.64858	0.00198073	-2.8237	6.84691e-05
A_24_P315862	-1.3847	0.026375	-1.6953	0.0163149	-2.4539	0.00165413
A_23_P206501	-1.38249	0.0410748	-1.6169	0.0412541	-2.13228	0.00660202
A_23_P131111	-1.38028	0.00638415	-1.36841	0.0312352	-2.01975	0.000931204
A_32_P187851	-1.37968	0.0118793	-1.6876	0.0067051	-2.31856	0.000730144
A_32_P97506	-1.37336	0.00198166	-1.18382	0.0670674	-2.46431	8.00578e-05
A_23_P369994	-1.37268	0.0101452	-1.74038	0.00496531	-2.23693	0.000636073
A_23_P106016	-1.36332	0.00635832	-1.2037	0.0926207	-2.28041	0.000185163
A_24_P65803	-1.36249	0.042225	-1.71191	0.0186054	-2.05152	0.00405872
A_24_P11142	-1.36202	0.00231355	-1.28911	0.0138382	-2.08603	0.000151915
A_23_P26810	-1.36188	0.0197786	-1.17842	0.0774705	-2.45799	0.000844548
A_24_P37020	-1.35929	0.0863598	-1.56944	0.0827472	-2.12466	0.0142676
A_23_P86550	-1.35482	0.0357829	-2.0185	0.0066731	-2.29326	0.00285328
A_32_P205139	-1.35468	0.0136687	-1.54647	0.0125427	-2.53565	0.000288763
A_32_P30187	-1.3541	0.0515054	-1.41364	0.0980604	-2.33174	0.00379016
A_32_P45462	-1.34797	0.00602486	-1.34292	0.0126905	-3.3723	5.31055e-05
A_24_P64362	-1.34741	0.0207939	-1.58489	0.0149028	-2.12356	0.0015258
A_23_P148798	-1.34657	0.00172569	-1.39776	0.00390386	-2.08125	7.79259e-05
A_23_P156209	-1.34376	0.00698646	-1.56069	0.00502846	-2.75572	8.19325e-05
A_32_P228438	-1.34048	0.0448472	-1.91092	0.00851917	-2.72098	0.00112911
A_23_P7313	-1.33867	0.00597968	-1.24027	0.0442807	-2.93718	5.79583e-05
A_23_P201538	-1.33752	0.019792	-1.46177	0.0257736	-2.36128	0.000813122
A_24_P673063	-1.33421	0.0487518	-1.46601	0.0620196	-3.62779	0.000394022
A_32_P213210	-1.33307	0.014034	-1.30306	0.0562426	-2.29775	0.000558341
A_24_P93931	-1.33083	0.0199791	-1.3123	0.0752521	-2.05696	0.00161175
A_32_P231346	-1.32864	0.0733479	-1.59174	0.0557476	-2.16842	0.00798405
A_23_P8497	-1.32214	0.0156199	-1.70098	0.00305787	-3.82963	5.79583e-05
A_23_P74269	-1.32208	0.012062	-1.34405	0.026157	-2.22325	0.000347768
A_32_P112970	-1.31535	0.0198279	-1.26305	0.0951202	-3.15017	0.00017946
A_32_P215100	-1.31023	0.0028363	-1.24034	0.0196642	-2.00406	0.000131937
A_32_P134772	-1.30688	0.0705576	-2.30414	0.00345191	-2.9649	0.000846635
A_32_P10403	-1.30332	0.0391201	-1.41399	0.0434196	-2.45651	0.000888917
A_32_P198584	-1.30288	0.023703	-1.83338	0.00282037	-2.51248	0.000298507
A_23_P207999	-1.29959	0.018558	-1.39879	0.0357601	-3.96125	0.00283508
A_24_P182182	-1.29867	0.0122625	-1.61605	0.00258055	-2.11077	0.000284904
A_32_P181891	-1.29648	0.0256942	-1.48037	0.0186686	-3.05518	0.000212424
A_23_P215790	-1.29544	0.0469471	-1.76444	0.0271942	-3.82554	0.000233729
A_23_P151459	-1.29366	0.0118793	-1.24207	0.0825957	-3.18297	8.38749e-05
A_24_P4661	-1.29311	0.00726235	-1.16709	0.0994246	-3.26187	3.42693e-05
A_23_P329727	-1.29033	0.00288768	-1.64027	0.00137906	-2.08213	0.00010338
A_24_P647163	-1.28111	0.0730453	-1.55334	0.0220646	-2.04472	0.00294931
A_23_P8363	-1.27766	0.0417444	-2.09222	0.00240962	-2.60013	0.000451434
A_23_P358564	-1.2772	0.00595849	-1.31673	0.0171221	-2.25643	0.000160967
A_23_P137573	-1.27652	0.0250795	-2.0043	0.00184698	-1.82067	0.00210158
A_23_P363149	-1.26909	0.0551049	-1.612	0.00746526	-2.29441	0.000602404
A_24_P340474	-1.26426	0.0158231	-1.37415	0.0209208	-2.78763	0.000135866
A_32_P184518	-1.26296	0.0136489	-1.55089	0.00323839	-2.48287	8.3923e-05
A_23_P83289	-1.26234	0.0826136	-1.67768	0.016564	-2.09155	0.00323227
A_32_P170368	-1.25707	0.0664894	-1.35302	0.0877716	-2.66707	0.000916924
A_24_P542375	-1.25033	0.042818	-1.60768	0.0074551	-2.26848	0.000523353
A_24_P273114	-1.2487	0.0232044	-2.02255	0.000897531	-1.93183	0.000560311
A_23_P332789	-1.24837	0.0690219	-1.59301	0.0191085	-2.19462	0.00175367
A_24_P35478	-1.24821	0.0119699	-1.24031	0.0392076	-2.25906	0.00016873
A_24_P14328	-1.24385	0.0118793	-1.24478	0.0472369	-2.13137	0.000240763
A_23_P67072	-1.23924	0.0157722	-1.62174	0.00148504	-2.82072	5.79583e-05
A_23_P57927	-1.23848	0.0123039	-1.32429	0.0175358	-2.11631	0.000234454
A_32_P158355	-1.23828	0.0206714	-1.67873	0.00245617	-2.84039	0.000100459
A_24_P911648	-1.23101	0.00789518	-1.16222	0.0794417	-2.21003	7.79589e-05
A_23_P165608	-1.22869	0.00927338	-1.16554	0.069201	-2.11265	8.91546e-05
A_23_P163278	-1.22288	0.00738241	-1.16254	0.0634005	-2.02463	0.000105808
A_24_P348173	-1.20986	0.0101452	-1.55907	0.00129009	-2.05634	7.22331e-05
A_24_P258277	-1.20566	0.0809007	-1.50691	0.0152736	-2.31339	0.000526681
A_23_P321160	-1.19422	0.0712367	-1.57985	0.00830497	-2.22823	0.000402486
A_23_P406508	-1.19191	0.061258	-1.35435	0.017999	-2.03277	0.000398366
A_23_P373649	-1.1914	0.0726334	-1.27371	0.0460422	-2.52726	0.000197803
A_23_P128319	-1.18822	0.0716942	-1.28373	0.0579286	-3.07668	0.000104122
A_23_P115375	-1.18442	0.0347459	-1.25996	0.0353876	-2.01865	0.000347768
A_24_P347411	-1.17826	0.0147237	-1.32456	0.00471729	-3.19387	1.78567e-05
A_24_P218074	-1.16361	0.0398503	-1.53868	0.00308689	-2.27145	0.000105808
A_23_P53126	-1.16317	0.0458569	-1.26612	0.0467546	-2.20946	0.000256825
A_24_P642328	-1.15396	0.0806073	-1.69082	0.00204897	-2.68123	7.64922e-05
A_23_P105873	1.11616	0.0910749	1.4926	0.00184698	2.35199	6.12928e-05
A_23_P500000	1.13529	0.0793818	1.19652	0.0740328	2.33833	0.000151915
A_23_P391396	1.14745	0.0570053	1.72989	0.000872203	2.20802	8.06e-05
A_23_P54000	1.14945	0.0703497	1.22117	0.0623784	2.0061	0.00038378
A_23_P87839	1.15199	0.0617548	1.60494	0.00351578	2.34168	0.000223898
A_24_P221475	1.15473	0.0254867	1.37751	0.00496981	2.23451	6.90646e-05
A_23_P101193	1.15516	0.0969115	1.76835	0.00236079	2.3853	0.000276568
A_23_P144929	1.15662	0.0586259	1.23942	0.0473967	2.0214	0.000216726
A_23_P146576	1.16148	0.0671789	1.46518	0.0097933	2.24851	0.000311062
A_23_P60306	1.16317	0.0475447	2.12134	0.00303372	1.4184	0.00482696
A_23_P203773	1.16381	0.0400907	1.44928	0.00499588	2.04895	0.00017946
A_24_P136551	1.16425	0.0567283	1.61974	0.00333204	2.06464	0.000446966
A_23_P36484	1.16618	0.0733294	1.2143	0.0683268	2.12091	0.000289607
A_24_P641130	1.17855	0.0128662	2.38189	0.00030273	1.30383	0.00337963
A_23_P365267	1.18003	0.0234407	1.33199	0.00659829	2.04987	0.00012379
A_24_P944782	1.18151	0.0804804	1.30435	0.0435316	2.16702	0.000484537
A_32_P50431	1.18241	0.0546865	1.35609	0.0171644	2.00132	0.000509715
A_24_P242036	1.18288	0.00715394	1.1282	0.0903169	2.16013	5.43603e-05
A_24_P257759	1.19015	0.0564717	1.85108	0.00188345	2.08569	0.000483401
A_23_P86587	1.19427	0.0115479	1.14709	0.0606509	2.03425	7.22331e-05
A_23_P72737	1.2043	0.0938498	1.56534	0.0120099	2.0913	0.00110418
A_24_P81841	1.20554	0.041647	1.72324	0.015545	2.27296	0.000227748
A_23_P168610	1.21014	0.0733294	1.3822	0.0384211	2.6299	0.000288763
A_23_P409489	1.21958	0.0499642	1.41553	0.0186686	2.17535	0.000480309
A_23_P205355	1.22988	0.0110034	1.46548	0.00436993	2.0386	0.000155468
A_23_P150818	1.23865	0.00904413	1.42461	0.00148504	2.08401	6.6024e-05
A_24_P935575	1.23884	0.00867927	1.21127	0.0220696	2.13049	8.02697e-05
A_24_P928798	1.23928	0.0357592	2.41943	0.000872203	1.84198	0.00180998
A_23_P69606	1.2419	0.0393459	1.82276	0.00316763	2.34188	0.000538543
A_24_P180680	1.26918	0.0217998	1.70917	0.00472335	2.72414	0.000204296
A_23_P119095	1.27241	0.0314491	1.43486	0.0274924	2.68159	0.000336341
A_24_P301629	1.27982	0.00972122	1.33031	0.0157326	2.08136	0.000212463
A_23_P123164	1.28151	0.0252964	1.58716	0.00804238	2.13499	0.000533862
A_23_P151915	1.28167	0.0158416	1.56717	0.00650047	2.15871	0.000521416
A_24_P931974	1.28228	0.017266	1.68733	0.00469144	2.23391	0.000599135
A_23_P10591	1.28383	0.00883897	1.46454	0.00703282	2.91306	7.79589e-05
A_24_P67784	1.28625	0.076184	1.7276	0.0194445	2.10802	0.00487727
A_32_P82265	1.29368	0.0243116	2.34251	0.00137906	1.65632	0.00605017
A_32_P126928	1.2998	0.00571613	1.17169	0.069201	2.71161	6.12928e-05
A_24_P418044	1.30005	0.00439417	1.51959	0.00240165	2.70041	5.31055e-05
A_23_P334664	1.30056	0.0058585	1.517	0.00406145	2.5354	9.95537e-05
A_23_P55477	1.30205	0.0694593	1.4084	0.0740289	2.22836	0.00300684
A_32_P124521	1.30314	0.0221607	1.2806	0.0968313	2.31469	0.000667105
A_23_P86072	1.30679	0.031598	2.08562	0.00290488	1.7236	0.00815234
A_23_P353005	1.30731	0.00288768	1.30135	0.0143868	2.32924	7.64922e-05
A_24_P229871	1.30888	0.0403046	1.36948	0.0868088	2.91407	0.000602404
A_24_P273043	1.3093	0.00189932	1.90633	0.000695942	2.42168	5.81536e-05
A_24_P924791	1.31377	0.00426034	1.19623	0.0586574	2.25915	8.38749e-05
A_23_P216667	1.32591	0.0132058	1.27488	0.0374976	2.30837	0.000233729
A_23_P310094	1.3339	0.0528639	1.56126	0.0469477	2.21726	0.0047849
A_24_P884376	1.33403	0.0336524	1.35682	0.0882381	2.06364	0.00325792
A_32_P12169	1.33411	0.00314385	1.22704	0.0212628	2.23092	8.02697e-05
A_23_P250353	1.33981	0.00325843	1.18607	0.0496872	2.35868	7.22331e-05
A_32_P183918	1.34177	0.0102696	1.47545	0.0140014	2.78717	0.000193224
A_24_P930707	1.34248	0.00427982	1.51013	0.00496981	2.57581	0.000103035
A_32_P35031	1.34286	0.0442951	2.8638	0.00182965	2.72146	0.00132633
A_32_P80255	1.34367	0.00167582	1.49718	0.00246911	2.89574	3.45739e-05
A_23_P168916	1.34616	0.0126301	1.51742	0.0141613	2.79568	0.000251515
A_23_P27936	1.34872	0.00268818	1.16039	0.031629	2.02897	6.99921e-05
A_24_P456723	1.35057	0.00621143	1.44038	0.00907119	2.2914	0.00017995
A_24_P87931	1.35173	0.00112283	1.41098	0.00345191	2.14721	7.64922e-05
A_24_P48187	1.35541	0.00119385	1.7891	0.000695942	2.17625	5.31055e-05
A_24_P179277	1.3581	0.0506199	1.43779	0.096307	2.71685	0.00189692
A_24_P333532	1.35936	0.00133918	1.52629	0.00182965	2.83353	3.45739e-05
A_23_P34733	1.36034	0.0438231	1.75282	0.021991	2.57285	0.00229304
A_24_P938015	1.36921	0.039645	1.43237	0.093066	2.263	0.00429705
A_32_P32876	1.37286	0.0103423	1.5049	0.0109516	2.12457	0.000730144
A_23_P315571	1.38598	0.00143339	1.14125	0.0783115	2.27206	7.22331e-05
A_24_P53976	1.39458	0.0347459	1.45166	0.0824187	2.64743	0.00193208
A_24_P940375	1.39459	0.0012915	1.63488	0.00139757	2.31945	7.19847e-05
A_23_P15647	1.41047	0.0183366	2.09491	0.00457792	1.6785	0.0135588
A_24_P920521	1.41191	0.0760175	2.16832	0.0187019	2.26071	0.0152232
A_32_P225092	1.41779	0.0270755	2.1067	0.0071206	2.24089	0.00382975
A_32_P84049	1.42123	0.000883222	1.45149	0.00354918	2.29056	7.64922e-05
A_23_P502241	1.43214	0.00131783	1.3547	0.0129007	2.01457	0.000307978
A_24_P11640	1.47453	0.000698705	1.29271	0.0103107	2.07021	0.00012379
A_23_P140342	1.47567	0.0123711	2.20704	0.00386227	2.34471	0.0018923
A_23_P404134	1.4787	0.0195577	2.175	0.00615963	2.41749	0.00270567
A_23_P64247	1.48612	0.0204629	2.08844	0.00856942	2.43511	0.00312515
A_24_P365526	1.49139	0.00229161	1.25609	0.0435316	2.91874	8.27373e-05
A_23_P371107	1.51877	0.0102131	2.07676	0.00490157	2.27254	0.00195746
A_24_P349636	1.52977	0.00117489	1.94125	0.000872203	2.94343	6.6024e-05
A_23_P70328	1.54171	0.00550696	1.74066	0.0113256	2.18996	0.00220595
A_23_P85585	1.54339	0.0125885	2.12423	0.00659829	2.31524	0.00315613
A_24_P65910	1.54599	0.00424527	2.12374	0.00220727	2.33182	0.000670995
A_24_P923142	1.55328	0.000530834	2.06012	0.000695942	1.81114	0.000361439
A_23_P135990	1.55758	0.0080067	1.37841	0.0937117	2.02291	0.00544563
A_24_P276583	1.58479	0.0016089	2.12735	0.00111697	2.26306	0.000289607
A_24_P203882	1.59283	0.00230391	1.39636	0.0328708	2.07382	0.0013071
A_32_P70483	1.60381	0.000457254	1.28902	0.00757638	2.36114	5.79583e-05
A_23_P253464	1.64417	0.00201599	1.58003	0.0135995	2.04412	0.00175864
A_23_P258891	1.67759	0.0118515	1.47451	0.0752521	2.27843	0.00471936
A_32_P50734	1.72839	0.0109615	1.61987	0.0710305	3.47237	0.00162931
A_32_P124580	1.78389	0.0060374	1.89537	0.0167972	2.61673	0.00300684
A_24_P917044	1.83475	0.00198616	1.73849	0.00310946	2.93994	0.000145947
A_24_P776036	2.01796	0.000614704	1.27878	0.0674203	1.4876	0.0109369
A_32_P187817	2.02076	0.000256997	1.51268	0.00359763	1.37596	0.00914712
A_23_P19313	2.11265	0.000564157	2.04746	0.00134321	2.94896	0.000145862
A_23_P257063	2.17092	0.0121067	1.83394	0.0793546	4.7167	0.00216803
A_32_P235796	2.19824	0.000457254	1.99575	0.00100094	2.90416	0.000103035
A_32_P627	2.20013	0.000462334	2.00197	0.00120661	2.72663	0.00014894
A_23_P153320	2.20472	0.000199633	2.16489	0.000404172	3.52436	2.9878e-05
A_24_P510081	2.2411	0.000350119	2.01779	0.000872203	2.76933	0.000103481
A_23_P106024	2.24777	0.000510328	2.04411	0.0013602	2.97612	0.000143576
A_23_P157196	2.25753	0.000527142	1.35613	0.051855	1.50901	0.0189744
A_23_P86975	2.26249	0.00020081	2.09151	0.000440367	3.18215	3.42693e-05
A_32_P230192	2.26508	0.000462334	1.98085	0.00141405	2.85289	0.000152179
A_24_P333630	2.27579	0.000218907	2.07618	0.000695942	2.77322	7.22331e-05
A_23_P140907	2.31146	0.000301033	2.06219	0.000831643	2.90054	8.25777e-05
A_24_P407439	2.44675	0.00020081	2.07355	0.000695942	3.03136	6.26685e-05
A_24_P325107	2.4543	0.000141488	1.2453	0.0648305	2.24422	0.000289797
A_32_P84933	2.52032	3.92e-05	1.17897	0.0856527	1.71151	0.000444269
A_24_P352445	2.6126	0.000256997	1.30616	0.0547941	1.62226	0.00522798
A_23_P254594	2.75447	0.000218907	1.27467	0.0814334	2.45591	0.000399368

## Sheet: FDR<0.01 & FC >±2
IDcommon	FC24	FDR24	FC48	FDR48	FC72	FDR72
A_23_P204810	-2.60544	0.000568644	-2.62044	0.00256894	-2.62691	0.00120326		**all values with all FDR below 1%
A_23_P105562	-2.22796	0.000457254	-1.91399	0.00308925	-3.06371	0.000212463
A_32_P103162	-2.20591	0.000111551	-1.89407	0.000890456	-3.13265	5.31055e-05
A_23_P369447	-2.13217	5.58e-05	-1.83389	0.000695942	-4.42325	1.78567e-05
A_23_P319466	-2.0559	0.000462334	-1.92374	0.00282037	-2.91069	0.000226043
A_32_P192586	-2.00954	0.000141488	-1.90409	0.000827201	-3.03868	4.50362e-05
A_32_P131940	-1.98258	0.00571613	-2.31707	0.00835975	-2.70226	0.00315575
A_23_P97749	-1.97985	0.00124244	-2.15833	0.00447277	-3.3979	0.000378765
A_24_P295452	-1.924	0.000447748	-1.7562	0.00339131	-2.86522	0.000135866
A_32_P136982	-1.91632	0.000241192	-1.9324	0.000904418	-3.15088	5.79583e-05
A_23_P30122	-1.90205	9.34e-05	-2.23216	0.00383778	-2.16568	5.31055e-05
A_32_P210572	-1.89103	0.000451469	-1.6712	0.00282037	-3.78447	4.5913e-05
A_24_P83799	-1.87021	0.000636933	-1.96336	0.00220727	-2.97764	0.000158928
A_23_P317082	-1.85806	0.000862305	-1.81699	0.00521383	-5.09551	6.71217e-05
A_24_P363609	-1.83969	0.000451469	-1.8803	0.00141405	-3.03346	8.06e-05
A_23_P141180	-1.82369	0.00262568	-1.96516	0.00618998	-3.21	0.000478471
A_24_P239578	-1.8169	0.000457254	-1.56946	0.00642071	-2.15726	0.000443654
A_23_P63829	-1.80983	0.00020889	-1.34226	0.00459359	-2.19251	7.64922e-05
A_24_P849319	-1.80376	0.000218907	-2.45422	0.00030273	-2.80335	4.15437e-05
A_23_P144911	-1.79104	0.00126062	-1.86647	0.00411238	-3.08032	0.000251515
A_24_P457912	-1.76607	0.00127056	-1.84505	0.00447277	-2.2249	0.00103105
A_32_P69536	-1.75269	0.00190024	-2.01157	0.00373108	-3.02365	0.000385385
A_23_P375524	-1.75011	0.00284927	-1.86771	0.0081085	-2.01422	0.00379605
A_32_P200697	-1.74034	0.00127992	-1.723	0.00357613	-3.30272	8.38749e-05
A_24_P99679	-1.71942	0.00405083	-2.14638	0.00521383	-2.09857	0.00388963
A_24_P58647	-1.69175	0.000558757	-1.40856	0.00383778	-4.8038	1.78567e-05
A_24_P408981	-1.68839	0.00453143	-2.18151	0.00345191	-2.97714	0.000472442
A_24_P265346	-1.68772	0.00020081	-1.4311	0.00236079	-2.61379	4.47758e-05
A_23_P69329	-1.64566	0.0015308	-2.1987	0.00120661	-2.52883	0.000234721
A_23_P79221	-1.64187	0.000462334	-1.36555	0.00924531	-2.16445	0.00012379
A_23_P128609	-1.63046	0.000620587	-1.50726	0.00407468	-2.31285	0.000141688
A_24_P817223	-1.61541	0.0014609	-1.52477	0.00934779	-3.13287	0.000119708
A_23_P54736	-1.6114	0.00586305	-1.8932	0.00827308	-2.49871	0.00148874
A_23_P61487	-1.60316	0.0025891	-1.82485	0.00412071	-2.85904	0.000251515
A_23_P393144	-1.59792	0.000271045	-2.02738	0.000440367	-2.63149	3.42693e-05
A_23_P87727	-1.5873	0.00238802	-2.17694	0.00134321	-3.21458	0.000105808
A_23_P47527	-1.57643	0.00197003	-2.37095	0.00081775	-3.73245	5.79583e-05
A_32_P235753	-1.56928	0.0075713	-2.08211	0.00436993	-2.00253	0.00366357
A_24_P818378	-1.56741	0.00171238	-1.47757	0.00844256	-2.37549	0.000230195
A_23_P212284	-1.56125	0.00344203	-1.625	0.00632756	-2.05203	0.000970025
A_23_P140716	-1.54721	0.000462606	-1.43732	0.00282037	-2.05564	7.64922e-05
A_23_P30736	-1.5422	0.00105421	-1.49524	0.00354918	-2.5036	8.19325e-05
A_23_P139265	-1.53829	0.00303256	-2.22491	0.000872203	-2.82981	0.000135866
A_24_P665504	-1.52867	0.000564157	-1.54529	0.00155624	-2.2205	7.64922e-05
A_24_P926189	-1.49312	0.00672875	-1.66264	0.00818551	-3.38354	0.000126328
A_23_P37244	-1.48969	0.00517902	-2.26587	0.000944867	-2.42395	0.000307465
A_23_P24870	-1.48478	0.0014609	-1.45237	0.00659829	-2.97952	5.31055e-05
A_23_P365081	-1.46298	0.00210277	-1.94001	0.00139886	-2.12605	0.000311138
A_23_P152873	-1.46137	0.00995236	-1.70255	0.00650073	-3.41836	0.000135866
A_32_P221624	-1.45504	0.00621143	-1.90546	0.00253307	-2.51517	0.000321831
A_23_P379736	-1.42997	0.00117253	-1.49516	0.00263556	-2.60305	4.5913e-05
A_23_P79703	-1.42185	0.00109774	-1.44167	0.00308631	-2.49217	4.52827e-05
A_32_P92101	-1.40221	0.0098457	-1.88145	0.0027475	-2.30337	0.000610824
A_32_P98496	-1.39536	0.000918238	-1.75135	0.000831643	-2.53933	5.31055e-05
A_32_P170178	-1.38542	0.00284927	-1.64858	0.00198073	-2.8237	6.84691e-05
A_23_P148798	-1.34657	0.00172569	-1.39776	0.00390386	-2.08125	7.79259e-05
A_23_P156209	-1.34376	0.00698646	-1.56069	0.00502846	-2.75572	8.19325e-05
A_23_P329727	-1.29033	0.00288768	-1.64027	0.00137906	-2.08213	0.00010338
A_23_P150818	1.23865	0.00904413	1.42461	0.00148504	2.08401	6.6024e-05
A_23_P10591	1.28383	0.00883897	1.46454	0.00703282	2.91306	7.79589e-05
A_24_P418044	1.30005	0.00439417	1.51959	0.00240165	2.70041	5.31055e-05
A_23_P334664	1.30056	0.0058585	1.517	0.00406145	2.5354	9.95537e-05
A_24_P273043	1.3093	0.00189932	1.90633	0.000695942	2.42168	5.81536e-05
A_24_P930707	1.34248	0.00427982	1.51013	0.00496981	2.57581	0.000103035
A_32_P80255	1.34367	0.00167582	1.49718	0.00246911	2.89574	3.45739e-05
A_24_P456723	1.35057	0.00621143	1.44038	0.00907119	2.2914	0.00017995
A_24_P87931	1.35173	0.00112283	1.41098	0.00345191	2.14721	7.64922e-05
A_24_P48187	1.35541	0.00119385	1.7891	0.000695942	2.17625	5.31055e-05
A_24_P333532	1.35936	0.00133918	1.52629	0.00182965	2.83353	3.45739e-05
A_24_P940375	1.39459	0.0012915	1.63488	0.00139757	2.31945	7.19847e-05
A_32_P84049	1.42123	0.000883222	1.45149	0.00354918	2.29056	7.64922e-05
A_24_P349636	1.52977	0.00117489	1.94125	0.000872203	2.94343	6.6024e-05
A_24_P65910	1.54599	0.00424527	2.12374	0.00220727	2.33182	0.000670995
A_24_P923142	1.55328	0.000530834	2.06012	0.000695942	1.81114	0.000361439
A_24_P276583	1.58479	0.0016089	2.12735	0.00111697	2.26306	0.000289607
A_32_P70483	1.60381	0.000457254	1.28902	0.00757638	2.36114	5.79583e-05
A_24_P917044	1.83475	0.00198616	1.73849	0.00310946	2.93994	0.000145947
A_32_P187817	2.02076	0.000256997	1.51268	0.00359763	1.37596	0.00914712
A_23_P19313	2.11265	0.000564157	2.04746	0.00134321	2.94896	0.000145862
A_32_P235796	2.19824	0.000457254	1.99575	0.00100094	2.90416	0.000103035
A_32_P627	2.20013	0.000462334	2.00197	0.00120661	2.72663	0.00014894
A_23_P153320	2.20472	0.000199633	2.16489	0.000404172	3.52436	2.9878e-05
A_24_P510081	2.2411	0.000350119	2.01779	0.000872203	2.76933	0.000103481
A_23_P106024	2.24777	0.000510328	2.04411	0.0013602	2.97612	0.000143576
A_23_P86975	2.26249	0.00020081	2.09151	0.000440367	3.18215	3.42693e-05
A_32_P230192	2.26508	0.000462334	1.98085	0.00141405	2.85289	0.000152179
A_24_P333630	2.27579	0.000218907	2.07618	0.000695942	2.77322	7.22331e-05
A_23_P140907	2.31146	0.000301033	2.06219	0.000831643	2.90054	8.25777e-05
A_24_P407439	2.44675	0.00020081	2.07355	0.000695942	3.03136	6.26685e-05
